# Supplementary material for: Genetic links between endometriosis and cancers in women
Source: PeerJ. 2019 Dec 20;7:e8135. doi: 10.7717/peerj.8135 (PMC6927350; doi:10.7717/peerj.8135)
Supplement: Table S1 [file peerj-07-8135-s003.xlsx]

## Sheet: Sheet1
Technology_type	GeneID	Gene_symbol	PubMedID	Sentence
expression analysis	693565	PGRMC2	22307145	Data suggest that reduced levels of membrane-bound PGRMC2 are associated with progesterone insensitivity observed in endometrium in a primate model of endometriosis.
expression analysis	52	ACP1	18490013	These findings suggest that carriers of high activity ACP1 genotypes are more susceptible to endometriosis but less susceptible to allergic manifestations than carriers of other ACP1 genotypes.
expression analysis	52	ACP1	23453606	A significant increase of PTPN22 *T allele in endometriosis is observed in women carrying ACP1*C allele, in women carrying p53 codon 72 *Pro allele
expression analysis	52	ACP1	26216523	ADA6, PTPN22 and ACP1 are involved in immune reactions: since endometriosis has an autoimmune component.
expression analysis	87	ACTN1	17525629	ACT1 is de-expressed in endometriosis and endometrioid carcinoma compared with normal uterine epithelium.
expression analysis	100	ADA	26216523	ADA6, PTPN22 and ACP1 are involved in immune reactions: since endometriosis has an autoimmune component.
expression analysis	100	ADA	29194839	this study shows that ADA is biomarker candidate for endometriosis
expression analysis	133	ADM	27491770	The levels of IL-8, IL-12, and adrenomedullin may be good indicators of embryo and oocyte quality in endometriosis patients undergoing IVF.
expression analysis	173	AFM	20858448	Afamin levels were altered significantly in the peritoneal fluid of women with endometriosis compared with disease-free controls.
expression analysis	177	AGER	19088375	Increased soluble RAGE is localized in ectopic endometrial cells of both adenomyosis and ovarian endometriomas; RAGE may contribute to the pathogenesis of endometriosis.
polymorphism	183	AGT	29303211	M235T polymorphism of the AGT gene seems unrelated to the development or the clinical course of endometriosis.
expression analysis	185	AGTR1	26366788	Our findings indicate that epidermal growth factor, interleukin-1beta and angiotensin II receptor, type 1 may play important roles in the pathogenesis of endometriosis.
expression analysis	196	AHR	11756572	The female reproductive tract expresses AHR and ARNT mRNA, and changes in expression at target sites in conditions such as endometriosis and uterine leiomyomas suggest a potential role for these factors in the pathogenesis of these conditions.
expression analysis	196	AHR	12200463	functional AhR are present in endometrial and endometriotic stromal cells and that TCDD up-regulates the expression of RANTES, providing a possible mechanistic link between dioxin exposure and chemokine expression in endometriosis.
expression analysis	196	AHR	23141164	The combined genotype GG + AG [from AhR -1661G/A (GG) and GSTP1 -313A/G (AG)] might be related with susceptibility to endometriosis.
expression analysis	197	AHSG	15589849	Proportion of noncarriers of AHSG 2 allele significantly higher in women with endometriosis than in women without. Women not carrying AHSG 2 allele were found to have twice the risk of endometriosis than those carrying at least one copy of this allele.
expression analysis	207	AKT1	19429661	Our results suggest that up-regulation of AKT1 and 4EBP1 in eutopic endometrium may be associated with the pathogenesis of endometriosis.
mutation analysis	207	AKT1	20493625	Direct sequencing analysis of endometrial DNA analysis did not reveal any activating somatic mutations in either PI3KCA or AKT1 gene, indicating that these mutations are rarely associated with endometriosis in South Indian women.
expression analysis	207	AKT1	21718677	mTOR/AKT inhibition by temsirolimus decreased endometriotic cell proliferation both in vitro and in vivo in a mouse model of deep infiltrating endometriosis
expression analysis	207	AKT1	22563025	CXCL8 and CXCR1 are involved in the pathogenesis of endometriosis by up-regulating proliferation and growth and restricting apoptosis in endometrial stromal cells by activating the PTEN/Akt pathway and mediating the expression of survivin and Bcl-2
expression analysis	207	AKT1	24605828	Data suggest that activation/phosphorylation/post-translational protein processing of AKT plays activ role in establishment of ectopic endometrial tissues as in endometriosis; phosphorylation of AKT at serine-473 appears to be involved.
expression analysis	231	AKR1B1	25446850	Higher expression of PLA2G2A, PTGS2, AKR1B1, AKR1C3 and ABCC4 was seen in 22-B endometriosis cells.
polymorphism	246	ALOX15	18692814	ALOX15 -292 C/T functional polymorphism was not correlated either with the risk of developing an endometriosis or with the risk of infertility.
expression analysis	268	AMH	17624337	Infertile patients with endometriosis have a decreased serum anti-Mullerian hormone.
expression analysis	268	AMH	20797901	This study shows that infertile patients with minimal/mild endometriosis have a similar concentration of AMH in the follicular fluid after natural IVF as compared with control subjects.
expression analysis	268	AMH	24210790	Patients with severe endometriosis had significantly lower serum AMH than controls, demonstrating of the damage of endometriosis on ovarian reserve.
expression analysis	268	AMH	24613539	Increased expression of antimullerian hormone in patients with endometriosis suggests a possible involvement of AMH in endometriosis.
expression analysis	268	AMH	24886254	The role of AMH in regulating cell viability and proliferation of endometriosis cells.
expression analysis	268	AMH	25824010	Anti-Mullerian hormone declined with women's increasing age in both plasma and peritoneal fluid in women with and without endometriosis.
polymorphism	268	AMH	28831646	AMH single nucleotide polymorphism is associated with Endometriosis-associated infertility.
expression analysis	269	AMHR2	24613539	Antimullerian hormone receptor expression is increased in endometrium from patients with endometriosis.
expression analysis	283	ANG	15236995	The inflammation associated with endometriosis, through increasing levels of peritoneal fluid angiogenin, might promote angiogenesis for progression of the disease and correlate with the extent of the disorder.
expression analysis	284	ANGPT1	16723371	Results suggest that the eutopic endometrium from endometriosis patients is more angiogenic and prone to growth because of greater Ang-1 mRNA and protein expression than the endometrium from women without endometriosis.
expression analysis	285	ANGPT2	16723371	Results suggest that the eutopic endometrium from endometriosis patients is more angiogenic and prone to growth because of higher Ang-2 mRNA expression than the endometrium from women without endometriosis.
expression analysis	285	ANGPT2	17141400	The higher expression of Hpa and Ang-2 in ectopic and eutopic endometrium may play an important role in the pathogenesis and development of endometriosis.
expression analysis	301	ANXA1	18706208	Annexin-1 is overexpressed in eutopic endometrium and presents in the peritoneal fluids of patients with endometriosis, and may play a role in the pathogenesis of endometriosis.
expression analysis	307	ANXA4	22883517	Lower expression of annexin A4 during window of implantation in infertile patients with endometriosis might be associated with the decrease of endometrial receptivity.
expression analysis	328	APEX1	25422360	The APEX1 Asp(148)Glu genotype correlates well with its mRNA and protein expression among endometriosis patients.
expression analysis	332	BIRC5	16644787	Results suggest that survivin and splice variant survivin-EX3 may be closely linked to escape from apoptosis and the development of endometriosis.
expression analysis	332	BIRC5	22563025	CXCL8 and CXCR1 are involved in the pathogenesis of endometriosis by up-regulating proliferation and growth and restricting apoptosis in endometrial stromal cells by activating the PTEN/Akt pathway and mediating the expression of survivin and Bcl-2
expression analysis	332	BIRC5	23729541	Data support biological model suggesting over-expression of survivin/BIRC5 in endometriosis serves as protective mechanism that defends pancreatic beta-cells from apoptosis during Th1-cell (helper-inducer T-lymphocytes) autoimmune assault. [LETTER]
expression analysis	348	APOE	22266326	Data suggest that there may be an association between APOE allelic frequency and spontaneous pregnancy loss in patients with endometriosis, which appears to be independent of mechanisms associated with infertility.
expression analysis	355	FAS	26156853	In women with endometriosis, immunostaining for Fas in the eutopic endometrium showed a reduced staining during the proliferative phase, whereas it was strong in the secretory phase. The epithelial cells of the ectopic endometrium showed a reduced staining for Fas independently from the menstrual phase with respect to the eutopic tissue
expression analysis	356	FASLG	12372468	serum and peritoneal fluid of women with moderate to severe endometriosis contain elevated concentrations of soluble Fas ligand compared to women with minimal or mild endometriosis and women without endometriosis
expression analysis	356	FASLG	26156853	In women with endometriosis, immunostaining for Fas-Ligand in the eutopic endometrium was stronger in the epithelial cells of secretory phase, while the epithelial cells of endometriotic lesions showed a significantly stronger staining for Fas-Ligand independently from the menstrual phase
polymorphism	367	AR	20190557	(CAG)n repeat polymorphism have some influence, but have not a straight relationship in infertile women with polycystic ovary syndrome and with endometriosis in Han Chinese women.
polymorphism	367	AR	28915409	AR gene CAG repeat polymorphisms are associated with the increased risk of mild endometriosis
expression analysis	387	RHOA	21303778	Ras/Raf/MAPK and RhoA/ROCKII signalling pathways are abnormally activated in eutopic endometrial stromal cells of patients with endometriosis
expression analysis	389	RHOC	23302395	Increased RHOC expression was detected in endometriotic lesions compared to the eutopic endometrium of women with endometriosis and control women.
expression analysis	405	ARNT	11756572	The female reproductive tract expresses AHR and ARNT mRNA, and changes in expression at target sites in conditions such as endometriosis and uterine leiomyomas suggest a potential role for these factors in the pathogenesis of these conditions.
polymorphism	405	ARNT	26101050	ARNT Val189Val polymorphism is not associated with endometriosis in Asians.
expression analysis	412	STS	15302278	Gonadotropin-releasing hormone agonist (leuprolide)inhibits estrone sulfatase expression in cystic endometriosis in the ovary.
expression analysis	412	STS	17454161	Sulfatase was significantly upregulated in ovarian tissue of patients with ovarian endometriosis.
expression analysis	412	STS	26723541	Effects of steroid hormone on estrogen sulfotransferase and on steroid sulfatase expression in endometriosis tissue and stromal cells
expression analysis	551	AVP	24488583	Serum copeptin levels were significantly higher in patients with endometriosis as compared to healthy controls. Moreover, severity of the disease was correlated with serum copeptin levels.
expression analysis	558	AXL	19055724	In human endometriosis, the PI3K-Akt and MAPK signaling pathways may be activated via overexpression of AXL and SHC1, respectively.
expression analysis	595	CCND1	16616093	Differences in oncoprotein expression between endometriotic and adenomyotic tissues provide further evidence that the pathogenesis of endometriosis is different from that of adenomyosis.
expression analysis	595	CCND1	19589865	The MAPK kinase-1/2 inhibitor, U0126, fully restored cAMP down-regulation of CCND1 in endometrial stromal fibroblasts of women with vs. without endometriosis.
expression analysis	595	CCND1	22884659	Cyclin D1 mRNA/protein expression levels were increased in ectopic tissue in peritoneal endometriosis.
expression analysis	596	BCL2	22563025	CXCL8 and CXCR1 are involved in the pathogenesis of endometriosis by up-regulating proliferation and growth and restricting apoptosis in endometrial stromal cells by activating the PTEN/Akt pathway and mediating the expression of survivin and Bcl-2
expression analysis	598	BCL2L1	19467764	Results suggest that an increased transcription of pro-apoptotic genes (p53 and Bcl-x(S)) in eutopic endometrium is significantly associated with endometriosis, which indicates dysregulation of apoptotic gene transcription associated with disease.
expression analysis	604	BCL6	26054109	peritoneal fluid mRNA level significantly lower in endometriosis
expression analysis	604	BCL6	27222232	Data suggest that B-cell CLL/lymphoma 6 is a promising candidate as a single diagnostic biomarker for detection of endometriosis in women with otherwise unexplained infertility and may be associated with endometrial dysfunction, including progesterone resistance.
polymorphism	627	BDNF	22447624	results suggest that the brain-derived neurotrophic factor (BDNF)(Met) single-nucleotide polymorphism might contribute to the increased susceptibility to the Stage III-IV endometriosis and endometriosis-related infertility
expression analysis	627	BDNF	26409150	Elevated plasma BDNF is a potentially useful clinical marker of endometriosis.
expression analysis	627	BDNF	28954602	Study shows that brain-derived neurotrophic factor concentrations in serum and peritoneal fluid were significantly higher in women with endometriosis with pain compared to women with endometriosis without pain.
expression analysis	633	BGN	21397694	Differential expression of 4 out of 5 genes related to estrogen metabolism and action (ESR1, ESR2, PGR and BGN) was confirmed in endometriosis.
expression analysis	639	PRDM1	26054109	peritoneal fluid mRNA level significantly elevated in endometriosis
expression analysis	668	FOXL2	24520083	FOXL2 mRNA is hyperexpressed in the endometrium in endometriosis.
mutation analysis	672	BRCA1	12568865	mutational analysis in a case of familial endometriosis
expression analysis	672	BRCA1	25380576	BRCA1 rs71361504 SNP may modify the endometriosis risk in Indian women. In addition, decreased expression of BRCA1 may play an important role in the pathophysiology of endometriosis in Indian population.
expression analysis	673	BRAF	21303778	Ras/Raf/MAPK and RhoA/ROCKII signalling pathways are abnormally activated in eutopic endometrial stromal cells of patients with endometriosis
expression analysis	673	BRAF	27087167	the BRAF pathway is activated in endometriotic cells from patients with endometriosis, and inhibition of the BRAF pathway can significantly decrease proliferation in both epithelial and stromal endometriotic cells in vitro and in vivo
expression analysis	673	BRAF	29286077	CREB1 may activate the transcription of wtBRAF through directly binding to its promoter, increasing BRAF expression and regulating the cell proliferation, migration and invasion of endometriosis.
mutation analysis	675	BRCA2	12568865	mutation analysis of this gene in a case of familial endometriosis
polymorphism	675	BRCA2	25380576	BRCA2 polymorphisms show no detectable endometriosis risk in Indian population.
expression analysis	682	BSG	24661733	Suggest that abnormally high expression of CD147 in ovarian endometriosis lesions with enhanced cell survival (reduced apoptosis) and migration, in an MMP-2-independent manner, may underlie the progression of endometriosis in humans.
expression analysis	687	KLF9	22259059	Loss of KLF9 coregulation of endometrial stromal progesterone receptor-responsive gene networks may underlie progesterone resistance in endometriosis.
expression analysis	718	C3	17482181	Impairment of the mechanisms involved in the regulation of activation of complement system factor C3c fragment may be important in the pathogenesis of endometriosis and endometriosis-associated infertility.
expression analysis	718	C3	19694644	plasma C3a levels can be used as diagnostic test for endometriosis
SNPs	718	C3	21733505	SNPs in the lysyl oxidase-like protein 4 and complement component 3 genes are associated with increased risk for endometriosis and endometriosis-associated infertility in a Puerto Rican population.
expression analysis	726	CAPN5	18829447	Calpain5 was expressed in endometrial stromal and glandular cells throughout the menstrual cycle and in decidua, and its expression was decreased in both stromal and glandular cells from women with endometriosis compared with that of fertile controls.
expression analysis	727	C5	17482181	Impairment of the mechanisms involved in the regulation of activation of complement system factors C5b-9 may be important in the pathogenesis of endometriosis and endometriosis-associated infertility.
expression analysis	727	C5	24316322	a significant up-regulation (173 fold increase, p < 0.0001) in the expression of inflammatory complement component 5 (C5) in endometriosis was detected for the first time.
expression analysis	735	C9	17482181	Impairment of the mechanisms involved in the regulation of activation of complement system factors C5b-9 may be important in the pathogenesis of endometriosis and endometriosis-associated infertility.
expression analysis	793	CALB1	20452033	upregulated in endometriosis tissues
expression analysis	800	CALD1	23575144	Caldesmon is a possible predictor of endometrial dysregulation in patients with endometriosis.
expression analysis	834	CASP1	22537218	lower secretion by peritoneal macrophages in endometriosis
expression analysis	847	CAT	12372460	Abnormal expression of catalase in the eutopic and ectopic endometrium strongly suggests pathologic involvement of free radicals in endometriosis and adenomyosis
polymorphism	847	CAT	25154023	This study indicates that catalase C-262T polymorphism is associated with the endometriosis.
expression analysis	864	RUNX3	25333219	RUNX3 inactivation by promoter hypermethylation plays a role in the progression of malignant transformation of ovarian endometriosis.
expression analysis	891	CCNB1	18353325	Cyclin B1 and Plk1 may play important roles in the pathogenesis of endometriosis by mediating ectopic endometrial cell proliferation under regulation of ovarian hormones.
expression analysis	909	CD1A	19321495	CD1a and CD83 may be involved in pain generation and the pathogenesis of endometriosis
expression analysis	960	CD44	25711649	a high expression of sCD44 is correlated with advanced stages of endometriosis. It is also concluded that the detection of serum and/or peritoneal fluid sCD44 may be useful in classifying endometriosis.
SNPs	998	CDC42	28171565	Results suggest that SNPs increasing endometriosis risk in this region act through CDC42.
polymorphism	999	CDH1	17660246	a relation between the E-cadherin 3'-UTR C --> T polymorphism, the -160 A/-347 GA haplotype of two promoter polymorphisms and risk of endometriosis
expression analysis	999	CDH1	22184339	Differential expression of E-cadherin has an important role in pathogenesis of endometriosis.
polymorphism	999	CDH1	22434855	E-cadherin gene polymorphism rs4783689 was marginally associated with endometriosis in the Japanese population
SNPs	999	CDH1	25150394	The rs8049282 SNP of the E-cadherin gene may be a potential molecular marker for the development of primary infertility in northern Chinese women with ovarian endometriosis.
expression analysis	999	CDH1	26198055	CDH1 is reduced in endometriosis.
expression analysis	999	CDH1	26484421	The CDH1 +54C/T was associated with susceptibility to endometriosis in Iranian population, and +54T allele may have a protective role in progression of endometriosis.
expression analysis	1000	CDH2	19898423	alterations of N-cadherin expression in gastrointestinal endometriosis may have an important role in the mechanism that underlies deep tissue invasion, and possibly also in the development of malignancy
expression analysis	1001	CDH3	12112590	may play a central role in the development of endometriosis by mediating endometrial-peritoneal cell interactions in a homophilic manner
expression analysis	1026	CDKN1A	22199295	p53 and CDKN1A genotypes are associated with endometriosis
expression analysis	1027	CDKN1B	18321488	P27Kip1 is down-regulated in the endometrium of women with endometriosis.
expression analysis	1027	CDKN1B	19493606	). Women who had at least one mutated allele presented twofold chances for endometriosis development (OR=1.9; 95% CI, 1.120-3.343).
expression analysis	1027	CDKN1B	20546339	Alteration of the p27(Kip1)-interacting cell-cycle regulators appeared strongly involved in the progression of endometriosis-associated ovarian clear cell carcinogenesis through increasing cell proliferative activity.
expression analysis	1027	CDKN1B	25534318	p27kip1 overexpression regulates VEGF expression, cell proliferation and apoptosis in cell culture from eutopic endometrium of women with endometriosis.
expression analysis	1027	CDKN1B	25666480	while p27 expression was similar in the endometriosis and non-endometriosis groups.
expression analysis	1027	CDKN1B	26817396	p27(kip1) overexpression regulates IL-1beta in the microenvironment of stem cells and eutopic endometriosis
expression analysis	1029	CDKN2A	16616093	Differences in oncoprotein expression between endometriotic and adenomyotic tissues provide further evidence that the pathogenesis of endometriosis is different from that of adenomyosis.
expression analysis	1050	CEBPA	23833041	Our findings suggest that C/EBP-alpha is involved in the pathogenesis of endometriosis by creating the proliferative, antiapoptotic, and other disease-specific characteristics of endometriosis.
polymorphism	1071	CETP	23772784	I405V polymorphism of CETP gene plays an important role as independent factor in the risk of endometriosis in women.
expression analysis	1072	CFL1	20646534	capacity and cofilin-1 expression level of eutopic endometrium of endometriosis were more intensive than that of normal endometrium.
expression analysis	1072	CFL1	20713416	The overexpression of CFL1 in stromal cells derived from eutopic endometria of women with endometriosis is associated with enhanced proliferation, adhesion, invasion and angiogenesis and reduced apoptosis in eutopic endometria with endometriosis.
expression analysis	1116	CHI3L1	19701838	YKL-40 is related to severity of peritoneal endometriosis.
expression analysis	1118	CHIT1	22132778	activity of chitotriosidase in plasma was statistically higher in severe endometriosis patients than women without endometriosis
expression analysis	1139	CHRNA7	27766701	alpha7nAChR activation inhibits the development of endometriosis by regulating inflammation.
expression analysis	1191	CLU	27071964	Study demonstrate high concentrations of clusterin (CLU) in mucus samples and significantly reduced CLU levels in cases with endometriosis receiving contraception compared to cases with endometriosis without contraception.
expression analysis	1230	CCR1	15950672	Increased constitutive expression of CCR1 in peritoneal macrophages of women with endometriosis may play a contributory role in the pathogenesis of endometriosis.
expression analysis	1230	CCR1	23219091	Elevated immunoreactivity of RANTES and CCR1 correlate with the severity of stages and dysmenorrhea in women with deep infiltrating endometriosis.
expression analysis	1236	CCR7	28856757	these data indicate CCL19/CCR7 contributes to proliferation and invasion of ESCs, which are conducive to the pathogenesis of endometriosis through activating PI3K/Akt pathway
expression analysis	1237	CCR8	17693327	The combination of 17beta-E(2) with the environmental pollutant TCDD is involved in the pathogenesis of endometriosis via up-regulating the chemokine CCR8-I-309.
expression analysis	1268	CNR1	22789143	Our studies reveal a role for the anti-inflammatory actions of progesterone in regulating endometrial cannabinoid signaling, which is disrupted in women with endometriosis.
polymorphism	1312	COMT	16527884	COMT, but not CYP1A1 or CYP17, appears to have roles in adenomyosis and endometriosis
polymorphism	1312	COMT	21495799	The COMT val/met polymorphism is not associated to endometriosis-related infertility in the Brazilian population evaluated.
meta analysis	1312	COMT	24965973	Meta-analysis. COMT 158G/A and CYP1B1 432C/G polymorphisms may contribute to the risk of endometriosis and adenomyosis, particularly in Asian populations.
methylation	1312	COMT	28074437	To summarize, significant differential methylation of HOXA10 and COMT promoter regions was found between the ectopic and eutopic endometrial tissues. This is the first study investigating the methylation of HOXA10 and COMT genes and their linkage to endometriosis in Chinese patients.
expression analysis	1364	CLDN4	18384777	Down-regulated expression of claudin-3 and claudin-4 in ectopic endometrium suggests that claudin-3 and claudin-4 might play a pathogenic role in the formation of endometriosis.
expression analysis	1364	CLDN4	19035134	Down-regulated expression of claudin-4 might play a pathogenic role in the formation of endometriosis.
expression analysis	1365	CLDN3	18384777	Down-regulated expression of claudin-3 and claudin-4 in ectopic endometrium suggests that claudin-3 and claudin-4 might play a pathogenic role in the formation of endometriosis.
expression analysis	1385	CREB1	29286077	CREB1 may activate the transcription of wtBRAF through directly binding to its promoter, increasing BRAF expression and regulating the cell proliferation, migration and invasion of endometriosis.
expression analysis	1392	CRH	21289256	Women with endometriosis show an impaired endometrial expression of CRH and Ucn mRNA.
expression analysis	1410	CRYAB	24945100	Data suggest expression of CRYAB in endometrium in women with endometriosis may be biomarker for subsequent fertility; CRYAB levels in normal range (neither up- nor down-regulated) are indicative of fertility following medical or surgical treatment.
expression analysis	1432	MAPK14	26394174	Data suggest PGE2 induces aromatase and ERB/ESR2 expression by interacting with c-Jun and p38a/MAPK14, thus influencing estradiol production in endometrial stromal cells; inactivation of c-Jun and p38a may be effective in treatment of endometriosis.
expression analysis	1435	CSF1	21481374	CSF-1, in an autocrine fashion, has a direct effect on endometrial epithelial cell proliferation and attachment to peritoneal mesothelial cells, early steps in endometriosis lesion formation on the peritoneum.
expression analysis	1435	CSF1	22365076	Suggest that CSF-1 and its receptor, C-FMS, are involved in the genesis of early endometriotic lesions and that endometriotic lesions contribute to elevated CSF-1 levels in the peritoneal fluid of women with endometriosis.
expression analysis	1436	CSF1R	22365076	Suggest that CSF-1 and its receptor, C-FMS, are involved in the genesis of early endometriotic lesions and that endometriotic lesions contribute to elevated CSF-1 levels in the peritoneal fluid of women with endometriosis.
polymorphism	1493	CTLA4	21599853	The data suggest that the CTLA4 polymorphism is not associated with endometriosis and/or infertility in Brazilian women.
expression analysis	1499	CTNNB1	18295959	Increased MMP-2 and -9 and altered beta-catenin may play a role in the pathogenesis of endometriosis.
mutation analysis	1499	CTNNB1	26276776	Distinct beta-catenin and PIK3CA mutation are linked in endometriosis-associated ovarian endometrioid and clear cell carcinomas
expression analysis	1499	CTNNB1	26432349	Estradiol promotes endometrial cell invasion by activating beta-catenin signaling pathway in endometriosis.
expression analysis	1499	CTNNB1	26888969	The promotion of MMP9 by the Wnt/beta-catenin signaling pathway under the regulation of E2 may contribute to the pathophysiology of human endometriosis.
expression analysis	1509	CTSD	20385381	Cathepsin D expression in ovarian endometriosis.
mutation analysis	1543	CYP1A1	12903034	Data show that the mutation allele of CYP1A1 gene appears to increase the risk of endometriosis
expression analysis	1543	CYP1A1	18849443	suggest an up-regulation of dioxin-inducible CYP1A1 and gamma-SYNUCLEIN occurs in endometriosis
polymorphism	1543	CYP1A1	27706624	This study showed that the CYP1A MspI polymorphism is associated with endometriosis, and that this type of polymorphism is more frequently observed in patients with infertility and severe endometriosis.
polymorphism	1545	CYP1B1	19199255	The gene polymorphisms of CYP1B1 in exon 2 codon 119 may be a genetic risky factor for endometriosis.
polymorphism	1557	CYP2C19	19499406	that CYP2C19*2 heterozygote genotype has higher risk of developing endometriosis. CYP2C19*2 allele gene polymorphisms may be associated with genetic susceptibility of endometriosis.
expression analysis	1557	CYP2C19	21497341	High-density fine-mapping of a chromosome 10q26 linkage peak suggests association between endometriosis and variants close to CYP2C19.
SNPs	1557	CYP2C19	24796765	Functional variants in CYP2C19 may contribute to endometriosis susceptibility in both familial and sporadic cases.
expression analysis	1576	CYP3A4	27995413	findings suggest that steroid hormones are able to regulate CYP3A4 mRNA expression, although the circulating levels of these hormones can only regulate control endometrium and not endometriosis tissues, probably because of dysregulated local steroid concentration in these latter samples.
expression analysis	1586	CYP17A1	15749482	ER alpha* 14 TA repeats and the CYP17* A1 allele are associated with an increased risk of endometriosis
polymorphism	1586	CYP17A1	18930188	CYP17 gene polymorphism in women affected with endometriosis.
polymorphism	1586	CYP17A1	20113968	Polymorphisms within the CYP17 gene is associated with endometriosis.
expression analysis	1586	CYP17A1	23809139	The CYP17 -34 G variant, previously associated with increased 17beta-estradiol production, displayed a contribution to stage I-II endometriosis in women from a Polish population.
polymorphism	1586	CYP17A1	25511200	the meta-analysis suggested that the CYP17 gene polymorphism was not associated with endometriosis risk.
expression analysis	1588	CYP19A1	15083380	Key enzyme for biosynthesis of estrogen, which is an essential hormone for the establishment and growth of endometriosis. Aromatase inhibitors could decrease pelvic pain associated with endometriosis. (Review)
expression analysis	1588	CYP19A1	15840311	Aromatase increases estrogen and estrogen receptor levels in the local ectopic tissues, thus promoting the growth and implantation of endometriosis.
expression analysis	1588	CYP19A1	16024248	Aromatase enzyme activity and mRNA levels are readily detectable in endometriosis and uterine leiomyomata.
PCR	1588	CYP19A1	16566930	We found, by reverse transcription--real time--polymerase chain reaction, that the expression of aromatase (CYP19) in ovarian, peritoneal endometriosis, and deep endometriotic nodules is significantly different.
expression analysis	1588	CYP19A1	16595205	Aromatase mRNA was higher in epithelial than in stromal cells in eutopic and ectopic endometrium in endometriosis. 17betaHSD2 in epithelial cells was increased during secretory phases compared with late proliferative phase.
expression analysis	1588	CYP19A1	17336977	Molecular alterations such as the presence of aromatase in endometriotic tissues could be involved in the development or maintenance of endometriosis.
expression analysis	1588	CYP19A1	17678915	Aberrant mRNA expression of aromatase, cytokines, and adhesion factors in endometrium and peritoneum suggests that both tissues are involved in the pathogenesis of endometriosis.
expression analysis	1588	CYP19A1	18048499	Aromatase expression in eutopic endometrium from endometriosis patients was significantly increased.
polymorphism	1588	CYP19A1	18930188	In patients affected with endometriosis, we observed that AA and CC genotypes were significantly represented in Val80 and C1558T polymorphisms of CYP19.
expression analysis	1588	CYP19A1	19137777	Aromatase expression by endometrial epithelial and stromal cells is an important part in pahtogenesis of endometriosis.
expression analysis	1588	CYP19A1	19493871	Unlike previous studies, we observed no aromatase protein in any of the endometriosis types, and barely detectable aromatase mRNA expression.
expression analysis	1588	CYP19A1	20430378	P450Arom induction in isolated control endometrial cells by peritoneal fluid from women with endometriosis.
expression analysis	1588	CYP19A1	20655525	The up-regulation of the aromatase gene in endometriosis may be ascribed to the epigenetic disorder associated with aberrant DNA demethylation in a nonpromoter CpG island
expression analysis	1588	CYP19A1	22578533	Lower estradiol production and P450 aromatase mRNA expression of cultured granulosa cells were found in women with endometriosis.
polymorphism	1588	CYP19A1	24411031	Polymorphisms of the aromatase gene confer susceptibility to advanced stage endometriosis in the Taiwanese Han population.
expression analysis	1588	CYP19A1	24654751	PGC-1alpha stimulated by TNF-alpha regulates aromatase expression and activity to promote local estrogen biosynthesis in ovarian endometriosis, suggesting that PGC-1alpha is a promising candidate for novel targeted therapies in endometriosis treatment.
expression analysis	1588	CYP19A1	25773531	results show reduced expression of the CYP19A1 in cumulus cells of infertile women with endometriosis, which may play a role in the pathogenesis of endometriosis-related infertility
expression analysis	1588	CYP19A1	26394174	Data suggest PGE2 induces aromatase and ERB/ESR2 expression by interacting with c-Jun and p38a/MAPK14, thus influencing estradiol production in endometrial stromal cells; inactivation of c-Jun and p38a may be effective in treatment of endometriosis.
expression analysis	1588	CYP19A1	27167072	Significant reduction of CYP19A1 gene expression in Cumulus cells of endometriosis patients may be the result of epigenetic alterations in its regulatory regions, either by DNA methylation or histone modifications.
expression analysis	1588	CYP19A1	27320036	Aromatase inhibitor treatment significantly increased expression of let-7f in Ishikawa cells and endometrial stroma cells from patients with endometriosis.
expression analysis	1612	DAPK1	26191186	miR-191-DAPK1 axis may play an important role modulating the response of ovarian endometriosis and endometrioid carcinoma cells to TNF-alpha.
expression analysis	1634	DCN	25244916	Decorin induced by dienogest appears to play a crucial role in suppressing endometriosis by exerting anti-proliferative effects and inducing cell cycle arrest.
polymorphism	1636	ACE	15531592	Alleles and genetic polymorphisms of angiotensin I-converting enzyme associated with susceptibility to and development of endometriosis were found.
polymorphism	1636	ACE	17186537	Data suggest that angiotensin I-converting enzyme gene polymorphisms are strongly related to the occurrence of endometriosis and moderately related to the occurrence of leiomyoma.
polymorphism	1636	ACE	24571615	ACE A2350G polymorphism associates with endometriosis in Polish individuals.
expression analysis	1667	DEFA1	21831449	Increased levels of human neutrophil peptides 1, 2, and 3 in peritoneal fluid of patients with endometriosis: association with neutrophils, T cells and IL-8.
expression analysis	1668	DEFA3	21831449	Increased levels of human neutrophil peptides 1, 2, and 3 in peritoneal fluid of patients with endometriosis: association with neutrophils, T cells and IL-8.
expression analysis	1676	DFFA	19535198	A decreased level of DFF45 observed in ovarian endometriosis may be a part of an apoptosis-resistant mechanism enhancing the disease progression.
expression analysis	1786	DNMT1	17081533	The genes DNMT1, DNMT3A, and DNMT3B were over-expressed in the ectopic endometrium as compared with normal control subjects or the eutopic endometrium of women with endometriosis.
expression analysis	1786	DNMT1	22349384	Decreased expression levels of DNMT1, DNMT3a, and DNMT3b in the ectopic endometrium and eutopic endometrium may play a role in patients with abnormal epigenetics which may lead to endometriosis.
expression analysis	1788	DNMT3A	17081533	The genes DNMT1, DNMT3A, and DNMT3B were over-expressed in the ectopic endometrium as compared with normal control subjects or the eutopic endometrium of women with endometriosis
expression analysis	1788	DNMT3A	22349384	Decreased expression levels of DNMT1, DNMT3a, and DNMT3b in the ectopic endometrium and eutopic endometrium may play a role in patients with abnormal epigenetics which may lead to endometriosis.
expression analysis	1789	DNMT3B	17081533	The genes DNMT1, DNMT3A, and DNMT3B were over-expressed in the ectopic endometrium as compared with normal control subjects or the eutopic endometrium of women with endometriosis
expression analysis	1789	DNMT3B	22349384	Decreased expression levels of DNMT1, DNMT3a, and DNMT3b in the ectopic endometrium and eutopic endometrium may play a role in patients with abnormal epigenetics which may lead to endometriosis.
expression analysis	1789	DNMT3B	26239024	The inability to downregulate DNMT3B expression in Endometriosis may contribute to an aberrant epigenetic fingerprint that misdirects gene expression in endometriosis and contributes to its altered response to steroid hormones.
PCR	1803	DPP4	24825423	Loss of CD26/DPPIV under hypoxia and the subsequent increase in migratory and angiogenic factors may favor conditions for lesion development in endometriosis.
expression analysis	1813	DRD2	20574053	Data indicate that DRD2 is expressed in human endometrium (both eutopic tissue and the ectopic tissue of endometriosis) and is regulated by dopamine
polymorphism	1813	DRD2	23260856	Our results revealed that an excess of DRD2 polymorphism 2 was found in exon 7 in women with peritoneal moderate/severe endometriosis.
expression analysis	1844	DUSP2	21984126	DUSP2 is an important molecule in endometrial physiology and that hypoxia-inhibited DUSP2 expression is a critical factor for the development of endometriosis.
polymorphism	1950	EGF	21982438	Discussion of hypothesis that endometriosis may be caused by interactions between EGF genotype variability and telomerase activity; shortening of telomeres (prevented by telomerase) regulates cell division and apoptosis. [LETTER]
expression analysis	1950	EGF	26366788	Our findings indicate that epidermal growth factor, interleukin-1beta and angiotensin II receptor, type 1 may play important roles in the pathogenesis of endometriosis.
polymorphism	1956	EGFR	15749523	EGFR gene 2073*T-related genotypes and allele are associated with higher susceptibilities to endometriosis and leiomyoma
expression analysis	1978	EIF4EBP1	19429661	Our results suggest that up-regulation of AKT1 and 4EBP1 in eutopic endometrium may be associated with the pathogenesis of endometriosis.
expression analysis	1991	ELANE	25284053	Three proteins-matrix metalloproteinase-9, neutrophil elastase, and FAM49B-were significantly lower in abundance in samples from women with endometriosis.
expression analysis	2018	EMX2	15126568	Endometrial EMX2 expression is aberrant in women with endometriosis and is mediated by altered HOXA10 expression.
SNPs	2018	EMX2	17563403	It is unlikely that the EMX2 or PTEN gene variants investigated contribute to risk for initiation and/or development of endometriosis.
expression analysis	2056	EPO	12525458	Epo and Epo-R localized within glandular epithelial cells in both peritoneal endometriosis and eutopic endometrium. Role in pathophysiology of endometriosis.
expression analysis	2057	EPOR	12525458	Epo and Epo-R localized within glandular epithelial cells in both peritoneal endometriosis and eutopic endometrium. Epo-R expression lower in black peritoneal lesions.
polymorphism	2099	ESR1	15749482	ER alpha* 14 TA repeats and the CYP17* A1 allele are associated with an increased risk of endometriosis
polymorphism	2099	ESR1	16169423	Patients with stage I/II endometriosis show a higher incidence of estrogen receptor alpha alleles with fewer (TA)n repeats (12-15 repeats) compared with controls.
expression analysis	2099	ESR1	16210018	In patients with endometriosis, epithelial and stromal cells from endometriotic lesions both express significantly higher levels of matrix metalloproteinase 1 and lower levels of ER alpha than corresponding cells in uterine endometrium.
polymorphism	2099	ESR1	16500359	Women affected by endometriosis with ERalpha polymorphic allele, even if heterozygous, have worse prognosis. ERalpha gene polymorphisms may be included among genetic risk factors for endometriosis.
expression analysis	2099	ESR1	16855153	both ERs were significantly overexpressed in macrophages of women with endometriosis compared with controls
polymorphism	2099	ESR1	17121748	ERalpha-351 XbaI*G- and -397 PvuII*C-related genotypes/alleles were correlated with higher susceptibilities of endometriosis or leiomyoma.
expression analysis	2099	ESR1	17413977	This is the first report demonstrating estrogen receptors and progesterone receptors in the smooth muscle cells in smooth muscle metaplasia outside the endometriotic foci of rectovaginal endometriosis.
expression analysis	2099	ESR1	17454161	Estrogen receptor alpha (ERalpha) was significantly downregulated in ovarian tissue of patients with ovarian endometriosis
expression analysis	2099	ESR1	17548071	Expression of ERalpha correlates with cytokine production in women with endometriosis.
expression analysis	2099	ESR1	18048499	ERbeta/ERalpha mRNA was significantly elevated in endometriosis. Expression of PR-C mRNA relative to PR-A and PR-B mRNA was significantly increased in endometriosis.
polymorphism	2099	ESR1	18687423	The X allele of ERalpha is associated with endometriosis in a Chinese population.
expression analysis	2099	ESR1	19217090	Expression of estrogen (ER) and progesterone (PR) receptors in the smooth muscle component (SMC) of deep infiltrating endometriosis.
polymorphism	2099	ESR1	19729795	ERalpha C allele confers approximately 2-fold increased risk of causing both endometriosis and fibroids, indicating that it can be considered risk marker in Asian Indian Women.
polymorphism	2099	ESR1	20586553	Genetic variants in ESR1, ESR2, and HSD17B1 genes could modify susceptibility to endometriosis and might influence the fertility status in endometriosis patients.
expression analysis	2099	ESR1	21269613	The higher PR-A and ER-alpha gene expression in granulosa cells in patients with endometriosis, compared with patients with tubal infertility, might be a leading cause of ovarian dysfunction due to endometriosis
expression analysis	2099	ESR1	21397694	Differential expression of 4 out of 5 genes related to estrogen metabolism and action (ESR1, ESR2, PGR and BGN) was confirmed in endometriosis.
expression analysis	2099	ESR1	21840910	analysis of Aurora A and B kinases, Ki-67 and the estrogen and progesterone receptors from an endometriosis tissue microarray model
expression analysis	2099	ESR1	22884659	Estrogen receptor alpha mRNA/protein expression levels were increased in ectopic tissue in peritoneal endometriosis.
polymorphism	2099	ESR1	23177411	The ESR1 polymorphism rs3798573 A/G was associated with risk of endometriosis and infertile endometriosis in Han women from central China.
polymorphism	2099	ESR1	24427778	An association between ESR1 rs9340799 polymorphism and infertile women with endometriosis.
methylation	2099	ESR1	24481237	The present study aimed to gain further insight into the DNA methylation patterns of alternative promoters of the steroid receptor genes ESR1, ESR2 and PGR in intestinal deep endometriosis.
expression analysis	2099	ESR1	24945100	Data suggest expression of ESR1 (but not ESR2) in endometrium in women with endometriosis may be biomarker for subsequent fertility; ESR1 levels in normal range or down-regulated are indicative of fertility following medical or surgical treatment.
expression analysis	2099	ESR1	25217304	ESR1 is strongly expressed in rectosigmoid endometriosis tissue.
polymorphism	2099	ESR1	27373811	Polymorphisms of the ESR1 gene are associated with the pathogenesis of endometriosis. [review]
expression analysis	2099	ESR1	29664547	Observed significant increase in HSD3B2 and ESR1 transcripts in follicular eutropic endometrium from infertile women with endometriosis may be related to abnormal biological effect of E2 in endometrium, further affecting the development of human embryos.
polymorphism	2100	ESR2	15193490	The AluI polymorphism in the ERbeta gene is associated with an increased risk of stage IV endometriosis in a Japanese population.
expression analysis	2100	ESR2	16855153	both ERs were significantly overexpressed in macrophages of women with endometriosis compared with controls
polymorphism	2100	ESR2	17474167	For advanced endometriosis, ESR2 gene RsaI polymorphism appeared to modify the effects of genistein (P for interaction = 0.03)
expression analysis	2100	ESR2	17548071	ERbeta expression was positively correlated with the expression of inflammatory cytokines in women with and without endometriosis.
methylation	2100	ESR2	17625110	Methylation of a CpG island at the ESR2 promoter region is a primary mechanism responsible for differential expression of ESR2 in endometriosis and endometrium.
expression analysis	2100	ESR2	18048499	ERbeta/ERalpha mRNA was significantly elevated in endometriosis. Expression of PR-C mRNA relative to PR-A and PR-B mRNA was significantly increased in endometriosis.
expression analysis	2100	ESR2	19217090	Expression of estrogen (ER) and progesterone (PR) receptors in the smooth muscle component (SMC) of deep infiltrating endometriosis.
polymorphism	2100	ESR2	19878085	ERbeta gene +1730 G/A polymorphism can be associated with the risk of endometriosis development, regardless of the stage of the disease.
polymorphism	2100	ESR2	20586553	Genetic variants in ESR1, ESR2, and HSD17B1 genes could modify susceptibility to endometriosis and might influence the fertility status in endometriosis patients.
polymorphism	2100	ESR2	20857063	The data suggest that the estrogen receptor beta gene (ERbeta) +1730 G/A polymorphism can be associated with risk of infertility and endometriosis-associated infertility.
expression analysis	2100	ESR2	21397694	Differential expression of 4 out of 5 genes related to estrogen metabolism and action (ESR1, ESR2, PGR and BGN) was confirmed in endometriosis.
polymorphism	2100	ESR2	21476192	frequency of heterozygous genotype AG of the RsaI polymorphism of the ERbeta gene in patients with endometriosis was approximately nine times higher than in control patients
methylation	2100	ESR2	22271293	discussion of role of ERbeta In endometrial tissue in endometriosis: Deficient methylation of ERbeta promoter results in pathological overexpression of ERbeta in endometriotic stromal cells. High levels of ERbeta suppress ERalpha expression. [REVIEW]
expression analysis	2100	ESR2	22884659	Estrogen receptor beta mRNA/protein expression levels were increased in ectopic tissue in peritoneal endometriosis.
methylation	2100	ESR2	24481237	The present study aimed to gain further insight into the DNA methylation patterns of alternative promoters of the steroid receptor genes ESR1, ESR2 and PGR in intestinal deep endometriosis.
expression analysis	2100	ESR2	26394174	Data suggest PGE2 induces aromatase and ERB/ESR2 expression by interacting with c-Jun and p38a/MAPK14, thus influencing estradiol production in endometrial stromal cells; inactivation of c-Jun and p38a may be effective in treatment of endometriosis.
expression analysis	2103	ESRRB	21561608	Data confirm the up-regulation of ER-beta as the principal receptor involved in the progression of human endometriosis.
expression analysis	2147	F2	15755869	findings imply that the thrombin/protease-activated receptor 1 system system might be involved in the pathophysiology of endometriosis, stimulating inflammatory responses of endometriotic cells and their mitogenic activity
expression analysis	2149	F2R	15755869	findings imply that the thrombin/protease-activated receptor 1 system system might be involved in the pathophysiology of endometriosis, stimulating inflammatory responses of endometriotic cells and their mitogenic activity
expression analysis	2214	FCGR3A	24807109	Women, w/ or w/o endometriosis, having larger populations of cytotoxic CD16(+) uterine NK cells and/or higher populations of NKp46(+)CD56(+) cells may be at greater risk of infertility resulting from inflammatory environment during implantation or later
PCR-RFLP	2237	FEN1	29109095	The FEN1 rs174538 A allele is a novel protective biomarker for endometriosis
expression analysis	2246	FGF1	12788899	According to phase of menstrual cycle, endometrial stromal cells from endometriosis patients in late proliferative phase had higher bFGF mRNA values and lower 1B FGF-antisense mRNA compared with controls
expression analysis	2247	FGF2	17578349	expression not different in endometriosis
polymorphism	2247	FGF2	20504870	The FGF2 754C/G polymorphism is associated with a risk of developing endometriosis and adenomyosis in north Chinese women.
expression analysis	2260	FGFR1	25500535	FGFR1 was found commonly overexpressed in ectopic endometrium of endometriosis compared with either its eutopic counterpart or endometrium from normal patients
expression analysis	2272	FHIT	19620087	Fhit may play an important role in the development of endometriosis.
expression analysis	2277	VEGFD	23585340	Dysregulated expression of VEGF-D likely contributes to altered angiogenesis, lymphangiogenesis, neurogenesis and immune function in endometriosis.
expression analysis	2288	FKBP4	27778641	Low expression of FKBP4 is associated with Progesterone Resistance in Endometriosis.
expression analysis	2321	FLT1	22230112	Report expression of VEGF/Flt1 in peritoneal and endometrial environment in patients with endometriosis.
expression analysis	2335	FN1	23142796	We confirm WNT4, CDKN2BAS and FN1 as the first identified common loci for endometriosis.
SNPs	2335	FN1	23315067	genome-wide association study of population in Northern Belgium: Data confirm a weak association between SNP in FN1 (rs1250248) and endometriosis. Authors recommend caution in interpreting genetic associations in complex diseases.
expression analysis	2353	FOS	17888430	Expression of c-fos in the human endometrium may be regulated by 17beta-E(2), and c-fos may be involved in development of endometriosis by promoting MMP-9 gene expression and subsequently the invasive potential of endometrial explants.
expression analysis	2353	FOS	19199093	Data suggest that c-fos may play a role in the molecular mechanisms of estrogen action on the induction, promotion or progression of endometriosis.
expression analysis	2475	MTOR	16884363	Activation of mammalian target of rapamycin is associated with postmenopausal ovarian endometriosis
expression analysis	2475	MTOR	21718677	mTOR/AKT inhibition by temsirolimus decreased endometriotic cell proliferation both in vitro and in vivo in a mouse model of deep infiltrating endometriosis
expression analysis	2475	MTOR	25721338	DJ-1 protein may be involved in endometrial cells proliferation, migration and angiogenesis by modulating the PI3K/Akt/p-mTOR signaling pathway, which provides an underlying theoretical target for endometriosis and adenomyosis
expression analysis	2488	FSHB	28901453	We found a genetic association between rs11031006 (FSHB) SNP and endometriosis. WNT4 and VEZT genes constitute the most consistently associated genes with endometriosis. In the present study, an association of rs7521902 (WNT4) and rs10859871 (VEZT) was confirmed in women with endometriosis at the genotypic but not the allelic level.
polymorphism	2492	FSHR	20817169	both the GG genotype (680Ser/Ser) and GA genotype (680Ser/Asn) were associated with a significantly lower risk of endometriosis
PCR	2492	FSHR	21474127	Patients with endometriosis and patients with poor ovarian reserve have abnormal follicle-stimulating hormone receptor signaling pathways.
polymorphism	2492	FSHR	25502184	The distributions of FSHR polymorphisms may not have an effect on endometriosis development but they are associated with the severity of the disease.
polymorphism	2492	FSHR	29683332	Findings suggest that 680Ser-Ser/GG genotype and "GG/307Ala680Ser" haplotype increase the risk of endometriosis in fertile women, while "GA/307Ala680Asn" haplotype decreases the risk of endometriosis development and progression.
expression analysis	2516	NR5A1	18165439	Data show that the elevated levels of USF2 in endometriosis account for, in part, the aberrant expression of SF-1 and its target gene StAR and aromatase.
expression analysis	2516	NR5A1	19549922	SF1 increases local concentrations of estrogen and mediates the proliferative effects of synthetic estrogens such as tamoxifen, in promoting endometriosis and endometrial cancers.
expression analysis	2516	NR5A1	19875956	strong expression in cortical and medullary ovarian mesenchymatous cells adjacent to endometriosis, potential role in steroidogenesis
expression analysis	2516	NR5A1	19930843	Increased steroidogenic factor 1 expression is associated with endometriosis severity.
expression analysis	2516	NR5A1	21926385	study demonstrated that methylation of a coding exon/intron sequence in the steroidogenic factor 1 gene positively regulated its expression in endometriosis
expression analysis	2624	GATA2	24603652	GATA6, which is hypomethylated and abundant in endometriotic cells, potently blocked hormone sensitivity, repressed GATA2, and induced markers of endometriosis when expressed in healthy endometrial cells.
expression analysis	2625	GATA3	26890586	GATA-3 was induced by estrogen and may promote the occurrence and development of endometriosis by regulating the secretion of cytokines in the eutopic endometrial cells of endometriosis patients.
methylation	2627	GATA6	24603652	GATA6, which is hypomethylated and abundant in endometriotic cells, potently blocked hormone sensitivity, repressed GATA2, and induced markers of endometriosis when expressed in healthy endometrial cells.
expression analysis	2638	GC	22158084	excretion of VDBP: Data suggest that urinary VDBP levels are elevated in patients with endometriosis; however, urinary VDBP levels appear to have limited potential as diagnostic biomarker for endometriosis.
expression analysis	2638	GC	24064663	Results of the present study therefore showed that DBP may play an important role in the progression of endometriosis.
expression analysis	2660	MSTN	28345488	Study showed the expression of myostatin in healthy endometrium and a higher expression in endometriosis and endometrial cancer, suggesting myostatin involvement in human endometrial physiology and related pathologies.
expression analysis	2661	GDF9	19931079	GDF-9 concentration in women with severe endometriosis was lower than in those without
expression analysis	2688	GH1	16564564	The results suggest that both IL-6 and GH may play a role in the progression of both endometriosis and endometrial carcinoma.
expression analysis	2691	GHRH	18684444	Variations in GHRH splice variants may play a role in promoting the development of endometriosis.
expression analysis	2697	GJA1	24270393	Connexin 43 is down-regulated in eutopic endometrium and cultured endometrial stromal cells from subjects with endometriosis.
expression analysis	2798	GNRHR	25592315	A high prevalence of endometriosis, polymorphism in the LHCGR and GnRH1 and progonadoliberin-2 antibodies in serum was found among the patients with severe dysmotility after treatment with GnRH analogs.
expression analysis	2852	GPER1	19549922	GPR30 increases local concentrations of estrogen and mediates the proliferative effects of synthetic estrogens such as tamoxifen, in promoting endometriosis and endometrial cancers.
expression analysis	2852	GPER1	22378861	Data suggest that normal endometrial GPER expression is cyclic and regulated by nuclear estrogen and progesterone receptors, while expression is dysregulated in endometriosis.
expression analysis	2852	GPER1	22495744	Hgih GPR30 expression is associated with endometriosis-associated ovarian carcinoma.
expression analysis	2852	GPER1	22520060	The present data indicate a unique GPER expression pattern in endometriosis, especially in endometriomas as compared to the normal endometrium.
expression analysis	2852	GPER1	23432876	This study found GPER expression to be modulated by stress-related hormones as well as inflammation and to be up-regulated in endometriosis-associated macrophages.
expression analysis	2852	GPER1	26193952	a significant positive correlation was found between GPER and Gankyrin both in ectopic and eutopic endometrium of the ovarian endometriosis.
expression analysis	2852	GPER1	27939762	G protein-coupled estrogen receptor stabilizes HIF-1alpha and thus promotes HIF-1alpha-induced VEGF and MMP9 in endometrial stromal cells, which play critical roles in endometriosis.
expression analysis	2852	GPER1	29845209	The findings indicate that GPER/miR148a/HLAG signaling pathway may mediates the development of ovarian endometriosis and may become a potential therapeutic target for the treatment of endometriosis.
expression analysis	2919	CXCL1	12012624	may play a role in the pathogenesis of endometriosis, possibly by chemoattraction and activation of neutrophils present in higher numbers in the peritoneal fluid of women with endometriosis
expression analysis	2919	CXCL1	22902060	IL-17A produced by neutrophils stimulates Gro-alpha secretion from endometrial stromal cells, thereby recruiting more neutrophils and inducing perpetuating inflammation in endometriosis.
expression analysis	2944	GSTM1	15059587	An association was found between glutathione S-transferase M1-null genotype and endometriosis.
polymorphism	2944	GSTM1	15861041	there is an association between endometriosis and the GSTM1 null deletion, but not with GSTT1 null deletions or the CYP1A1 MspI polymorphism in South Indian women
polymorphism	2944	GSTM1	19535834	Women having higher concentration of polychlorinated biphenyls and GSTM1 null (*0/*0) polymorphism might have an increased susceptibility of endometriosis.
expression analysis	2944	GSTM1	20147336	both GSTM1 null genotype and phthalate exposure are associated with adenomyosis, leiomyoma and endometriosis
polymorphism	2944	GSTM1	20504102	This study suggests that GSTM1 null genotype is associated with higher risk of endometriosis.
SNPs	2944	GSTM1	22017422	In the single SNP analysis, GSTM1 null type and AhRR variant type were associated with a significantly increased risk of endometriosis.
expression analysis	2944	GSTM1	22424617	A gene-environment interaction was observed for GSTP1(Ile/Ile) and GSTM1 null genotypes, modulating the effect of polychlorinated biphenyls on endometriosis risk.
meta analysis	2944	GSTM1	25208225	null genotypes of GSTM1 and/or GSTT1 contribute to risk of endometriosis
meta analysis	2944	GSTM1	25443469	GSTM1 null genotype increases the overall risk of endometriosis. [meta-analysis]
meta analysis	2944	GSTM1	25461363	Meta-analysis provides strong evidence that the GSTM1 and GSTT1 polymorphisms are associated with the development of endometriosis.
polymorphism	2944	GSTM1	25549292	gene deficiency predisposes to endometriosis in a Tunisian population
polymorphism	2944	GSTM1	26350109	GSTM1 null genotype frequency was similar between Brazilian women with and without endometriosis.
meta analysis	2944	GSTM1	26370772	This meta-analysis supports that the GSTM1/GSTT1 null genotype might contribute to individual susceptibility to endometriosis in Chinese populations, especially in Chinese Han. [Meta-Analysis]
polymorphism	2950	GSTP1	15878920	GSTP1 polymorphism might modulate the risk of endometriosis with significantly decreased risk for GSTP1 val/val and marginally increased risk for GSTP1 ile/ile
expression analysis	2950	GSTP1	22424617	A gene-environment interaction was observed for GSTP1(Ile/Ile) and GSTM1 null genotypes, modulating the effect of polychlorinated biphenyls on endometriosis risk.
polymorphism	2950	GSTP1	24183097	GSTP1 -313A/G polymorphism may not be associated with endometriosis risk, while the observed increase in risk of endometriosis may be due to small-study bias
expression analysis	2952	GSTT1	14980314	findings suggest that the glutathione S-transferase M1 and T1 null mutations are not likely to be associated with an increased risk of endometriosis in a Japanese population
PCR	2952	GSTT1	15059587	An association was found between GSTT1-null genotype and endometriosis.
polymorphism	2952	GSTT1	15861041	there is an association between endometriosis and the GSTM1 null deletion, but not with GSTT1 null deletions or the CYP1A1 MspI polymorphism in South Indian women
polymorphism	2952	GSTT1	17513317	the AhRR codon 185 and GSTT1 polymorphisms are associated with the risk of advanced stage endometriosis
meta analysis	2952	GSTT1	25208225	null genotypes of GSTM1 and/or GSTT1 contribute to risk of endometriosis
meta analysis	2952	GSTT1	25461363	Meta-analysis provides strong evidence that the GSTM1 and GSTT1 polymorphisms are associated with the development of endometriosis.
polymorphism	2952	GSTT1	25549292	gene deficiency predisposes to endometriosis in a Tunisian population
polymorphism	2952	GSTT1	26350109	The GSTT1 null genotype was more frequent in Brazilian women without endometriosis.
meta analysis	2952	GSTT1	26370772	This meta-analysis supports that the GSTM1/GSTT1 null genotype might contribute to individual susceptibility to endometriosis in Chinese populations, especially in Chinese Han. [Meta-Analysis]
expression analysis	3065	HDAC1	22344732	studies suggest that endometriosis etiology may be partially explained by epigenetic regulation of gene expression due to dysregulations in the expression of histone deacetylase 1 and 2
expression analysis	3065	HDAC1	23690335	HDAC-1, but not HDAC-2/-3, was significantly increased in endometriosis and associated with steroid hormone receptor expression.
expression analysis	3066	HDAC2	22344732	studies suggest that endometriosis etiology may be partially explained by epigenetic regulation of gene expression due to dysregulations in the expression of histone deacetylase 1 and 2
expression analysis	3082	HGF	14764801	HGF/Met system is involved in the pathogenesis of endometriosis by promoting stromal cell proliferation and invasion of shed endometria and endometrial lesions via autocrine and paracrine pathways.
expression analysis	3082	HGF	15602080	is produced by peritoneal macrophages and is possibly involved in the growth of endometriosis
expression analysis	3082	HGF	16006475	IL-6 and TNFalpha are involved in the production of HGF by endometrial stromal cells and may be involved in the growth of endometriosis by an autocrine mechanism
expression analysis	3091	HIF1A	17545054	HIF-1alpha expression increases in ectopic endometrium, suggesting that HIF-1alpha plays an important role in the pathogenesis of endometriosis.
expression analysis	3091	HIF1A	27094478	Both hypoxia and epithelial-mesenchymal transition are associated in the establishment of endometriosis, and that HIF-1a-induced EMT can be observed in endometrial epithelial cells derived from normal fresh human endometria and eutopic endometrial tissues from patients with endometriosis.
expression analysis	3091	HIF1A	27939762	G protein-coupled estrogen receptor stabilizes HIF-1alpha and thus promotes HIF-1alpha-induced VEGF and MMP9 in endometrial stromal cells, which play critical roles in endometriosis.
expression analysis	3091	HIF1A	28348069	High HIF1A expression is associated with endometriosis.
expression analysis	3091	HIF1A	30074218	the expression of MMIF, HIF-1alpha, and VEGF in the serum and endometrial tissues may be used to assess the stage of endometriosis and the severity of dysmenorrhea.
expression analysis	3105	HLA-A	18458507	The present study suggest that the susceptibility to advanced endometriosis, unlike in the Japanese population, is not associated with HLA-A antigens in the Korean population.
polymorphism	3123	HLA-DRB1	11870103	Genotyping of HLA-DRB1 alleles in endometriosis.
PCR	3123	HLA-DRB1	16155070	Susceptibility of advanced endometriosis is not associated with HLA-DRB1 alleles in a Korean population, which is apparently not the case in the Japanese population.
polymorphism	3123	HLA-DRB1	20797713	We found an association of CCL21 (rs2812378) and HLA-DRB1 (rs660895) with moderate to severe endometriosis
expression analysis	3135	HLA-G	17509578	Soluble HLA-G level in the peritoneal fluid of women with endometriosis is similar to that of the control group.
polymorphism	3135	HLA-G	29234882	Results show that HLA-G rs1233334:CT protected against progression of endometriosis.
expression analysis	3135	HLA-G	29845209	The findings indicate that GPER/miR148a/HLAG signaling pathway may mediates the development of ovarian endometriosis and may become a potential therapeutic target for the treatment of endometriosis.
expression analysis	3146	HMGB1	26872033	HMGB1 and TLR4 are overexpressed in endometriosis patients and correlate with the extent of stromal and epithelial cell death.
expression analysis	3146	HMGB1	29017437	HMGB1 expression was higher in menstrual blood compared to serum or peritoneal fluid and may promote endometriosis.
expression analysis	3159	HMGA1	22221703	These findings suggest that HMGA rearrangements likely contribute to the pathogenesis of endometriosis.
expression analysis	3164	NR4A1	29669342	Inhibition of NR4A1 in stromal cells increased the TGF-beta1-dependent elevated expression of fibrotic markers, and loss of NR4A1 stimulated fibrogenesis in mice with endometriosis.
expression analysis	3170	FOXA2	29233503	might be a progesterone-induced gene, which may participate in the 'metastatic' process of eutopic endometrium to ectopic loci in patients with endometriosis
expression analysis	3206	HOXA10	16098858	The aberrant methylation at HOXA10 may be responsible for the aberrant gene expression in the endometrium of women with endometriosis.
expression analysis	3206	HOXA10	16647375	However, the diminished expression of HOXA10 in ectopic endometrium might not allow for normal endometrial development and might contribute to the pathogenesis of endometriosis by creating P resistance.
polymorphism	3206	HOXA10	18339267	Endometriosis patients with HOXA10 polymorphism were associated with a lower serum cancer antigen-125, a lower American Fertility Society score and less severe obliterated cul-de-sac.
expression analysis	3206	HOXA10	18829447	Calpain5 expression is regulated by HOXA10. Calpain5 expression was decreased in endometriosis likely as a result of decreased HOXA10 expression.
expression analysis	3206	HOXA10	20821045	Abnormal endometrial HOXA10 expression is associated with infertility in endometriosis patients.
expression analysis	3206	HOXA10	20971605	DNA hypermethylation can be one of the potential molecular mechanisms silencing HOXA10 expression in the midluteal endometrium associated with infertility in women with endometriosis.
expression analysis	3206	HOXA10	21576276	results indicate that the coding regions of INHBA, SFRP4 and HOXA10 do not harbour mutations responsible for linkage to endometriosis in the families studied
expression analysis	3206	HOXA10	21956427	HOXA10 was aberrantly regulated in the endometrium of women with endometriosis by both miR135a and miR135b.
expression analysis	3206	HOXA10	22915150	The level of HOXA10 decreases in the eutopic endometrium of patients with endometriosis.
expression analysis	3206	HOXA10	23412855	There are complex etiopathogenic mechanisms for endometriosis between INFG and HOXA10.
expression analysis	3206	HOXA10	23979130	Lower expression of HOXA10 is associated with endometriosis-associated infertility.
methylation	3206	HOXA10	24963168	The HOXA10 gene is more methylated in the eutopic endometrium of patients with endometriosis.
expression analysis	3206	HOXA10	25217304	HOXA10 is expressed in rectosigmoid endometriosis, where it likely imparts the de novo identity of endometriotic lesions.
expression analysis	3206	HOXA10	26552702	Regulated HOXA10 and HOXA11 expression is necessary for endometrial receptivity; decreased HOXA10 or HOXA11 expression leads to decreased implantation rates. Alternation of HOXA10 and HOXA11 expression has been identified as a mechanism of the decreased implantation associated with endometriosis, polycystic ovarian syndrome, leiomyoma, polyps, adenomyosis, and hydrosalpinx.
methylation	3206	HOXA10	26865543	The HOXA10 gene in women with endometriosis was hypomethylated compared to controls.
methylation	3206	HOXA10	28074437	To summarize, significant differential methylation of HOXA10 and COMT promoter regions was found between the ectopic and eutopic endometrial tissues. This is the first study investigating the methylation of HOXA10 and COMT genes and their linkage to endometriosis in Chinese patients.
expression analysis	3207	HOXA11	20695189	Our results suggest that altered HOXA11 gene expression in the endometrium during a menstrual cycle may be a common phenomenon among patients with endometriosis and may cause infertility in this group of patients
expression analysis	3207	HOXA11	21987111	Endometrial HOXA11 and LIF mRNA expression levels (normalized to beta-actin expression) were significantly decreased in endometrium of infertile patients with endometriosis compared with healthy fertile controls
expression analysis	3207	HOXA11	22233680	reduced HOXA11 expression may contribute to endometriosis-associated infertility
expression analysis	3207	HOXA11	23979130	Lower expression of HOXA11 is associated with endometriosis-associated infertility.
expression analysis	3207	HOXA11	26552702	Regulated HOXA10 and HOXA11 expression is necessary for endometrial receptivity; decreased HOXA10 or HOXA11 expression leads to decreased implantation rates. Alternation of HOXA10 and HOXA11 expression has been identified as a mechanism of the decreased implantation associated with endometriosis, polycystic ovarian syndrome, leiomyoma, polyps, adenomyosis, and hydrosalpinx.
expression analysis	3240	HP	15866595	Women with endometriosis have higher peritoneal fluid and plasma expression levels of haptoglobin beta chain isoform E (molecular weight, 38.40 +/- 0.94 kD; and isoelectric point, 5.63 +/- 0.17).
expression analysis	3265	HRAS	21303778	Ras/Raf/MAPK and RhoA/ROCKII signalling pathways are abnormally activated in eutopic endometrial stromal cells of patients with endometriosis
expression analysis	3284	HSD3B2	29664547	Observed significant increase in HSD3B2 and ESR1 transcripts in follicular eutropic endometrium from infertile women with endometriosis may be related to abnormal biological effect of E2 in endometrium, further affecting the development of human embryos.
polymorphism	3292	HSD17B1	15640252	Evidence for association between the Ser312Gly polymorphism in HSD17B1 and endometriosis was found in a Japanese population
expression analysis	3292	HSD17B1	17454161	17beta-hydroxysteroid dehydrogenase type 1 was significantly upregulated in ovarian tissue of patients with ovarian endometriosis.
expression analysis	3292	HSD17B1	20586553	Genetic variants in ESR1, ESR2, and HSD17B1 genes could modify susceptibility to endometriosis and might influence the fertility status in endometriosis patients.
polymorphism	3292	HSD17B1	22613790	In this review, the results suggest that HSD17B1 and PR polymorphism may play a role in the risk of endometriosis
expression analysis	3292	HSD17B1	27102893	The structure of human 17beta-HSD1 and biological function have been studied extensively in the last two decades. In humans, the enzyme is expressed in placenta, ovary, endometrium and breast; high activity of estrogen activation provides the basis of 17beta-HSD1's implication in estrogen-dependent diseases, such as breast cancer, endometriosis and non-small cell lung carcinomas. [Review]
polymorphism	3292	HSD17B1	28405865	Our genetic study demonstrated HSD17B1 937 G variant as a risk factor for infertility in women with stage I and II endometriosis in Polish Caucasian patients.
expression analysis	3294	HSD17B2	16595205	Aromatase mRNA was higher in epithelial than in stromal cells in eutopic and ectopic endometrium in endometriosis. 17betaHSD2 in epithelial cells was increased during secretory phases compared with late proliferative phase.
expression analysis	3294	HSD17B2	17505937	The expression of 17beta-hydroxysteroid dehydrogenase type 2 (17beta-HSD2) in eutopic and ectopic endometrial tissues of women with endometriosis is reported.
expression analysis	3371	TNC	17681310	The modulation of tenascin as an extracellular matrix protein by estradiol in endometriotic stromal cells may be one of the factors playing a role in the development of endometriosis.
expression analysis	3383	ICAM1	11716965	A defective expression of ICAM-1 (CD54) on secretory endometrial cells is associated with endometriosis.
expression analysis	3383	ICAM1	11963839	women with stage III and IV endometriosis had higher serum concentrations of soluble VCAM-1, lower serum concentration of soluble ICAM-1
polymorphism	3383	ICAM1	12529420	the potential associations of ICAM-1 gene polymorphisms with endometriosis and its severity
expression analysis	3383	ICAM1	15212674	The ICAM-1 expression in visually normal peritoneal cells from women with endometriosis may play a role in the early implantation of peritoneal endometriosis.
polymorphism	3383	ICAM1	16938116	IL-6 -634C/G and ICAM-1 469K/E polymorphisms synergistically affect the susceptibility for endometriosis in the Japanese population.
expression analysis	3383	ICAM1	19661147	The deregulation of MMP9, and the TNF participation in the MMP1 and proMMP9 secretions, in the MMP9 expression and in the expression and cleavage of ICAM1 may contribute to the pathophysiology of endometriosis disease.
polymorphism	3383	ICAM1	20422421	polymorphism in codon 241 associated with development of endometriosis susceptibility in the population of northern Iran
polymorphism	3383	ICAM1	25859827	protection of the ICAM-1 K469E polymorphism among the Asians (OR 0.91-0.95, p = 0.35-0.71) with endometriosis. These effects were weak but non-heterogeneous (P heterogeneity = 0.17-0.57, I (2) = 0-40 %)(Meta-Analysis)
expression analysis	3397	ID1	26577912	Peritoneal VEGF-A expression is regulated by TGF-beta1 through an ID1 pathway in women with endometriosis
expression analysis	3398	ID2	27385728	ID2 is localized to peritoneal mesothelial and stromal cells of women with and without endometriosis. ID2 mRNA expression is lower in peritoneum adjacent to the endometriosis lesions compared to distal sites
expression analysis	3398	ID2	28678915	The ID2 gene expression was increased in the most advanced stage of endometriosis and in ovarian endometriomas. Considering that the genes studied participate either directly or indirectly in cellular processes that can lead to cell migration, angiogenesis, and inappropriate invasion, it is possible that the deregulation of these genes caused the development and maintenance of ectopic tissue.
expression analysis	3426	CFI	17482181	Impairment of the mechanisms involved in the regulation of activation of complement system factor iC3b may be important in the pathogenesis of endometriosis and endometriosis-associated infertility.
polymorphism	3458	IFNG	15166131	IFNG CA-repeat polymorphism is associated with susceptibility to endometriosis in a Japanese population.
expression analysis	3458	IFNG	17582674	Serum of subjects with endometriosis contains significantly higher levels of interleukin-6, monocyte chemotactic protein-1, and interferon-gamma than control women.
polymorphism	3458	IFNG	21477169	Our results suggest that the (CA)(n) repeat polymorphism in the IFN-gamma gene may be associated with a risk of endometriosis in the South Korean population.
expression analysis	3458	IFNG	23412855	There are complex etiopathogenic mechanisms for endometriosis between INFG and HOXA10.
radioimmunoassay	3479	IGF1	12571183	Follicular fluid IGF-1 and IGFBP-3 levels were not significantly different among the groups; however, follicular fluid IGFBP-1 levels were lower in those patients with moderate/severe endometriosis
expression analysis	3479	IGF1	20844834	IGF-1Ec transcript might generate, apart from mature IGF-1 peptide, another posttranslational bioactive product that may have an important role in endometriosis pathophysiology
polymorphism	3479	IGF1	21251749	In genetic association studies, no association was found between the IGF-I SNPs investigated (-603A>T; -553T>C) and endometriosis in a Korean population of women.
polymorphism	3481	IGF2	21251749	genetic association studies: IGF-II SNP 820G>A (in 3' untranslated region) is associated with endometriosis in a Korean population of women; endometriosis was observed 1.99 times more frequently in GG genotype
expression analysis	3486	IGFBP3	12571183	Follicular fluid IGF-1 and IGFBP-3 levels were not significantly different among the groups; however, follicular fluid IGFBP-1 levels were lower in those patients with moderate/severe endometriosis
expression analysis	3486	IGFBP3	14644829	IGFBP-3 mRna expression is increased in endometriosis, compared to normal endomatrium.
expression analysis	3486	IGFBP3	22381038	The AAG haplotype allele of the -672A>G, -202A>C and c.95C>G polymorphisms in the IGFBP3 gene may be associated with advanced endometriosis in Korean women.
expression analysis	3490	IGFBP7	19019211	Patients with endometriosis and those with type II diabetes mellitus undergoing hemodialysis had significantly higher serum concentrations of IGFBP7 than the relevant control subjects.
expression analysis	3491	CCN1	15044605	Results suggest that Cyr61 may represent a gene characteristic for endometriosis and may play an important role in the development and persistence of endometriotic lesions.
expression analysis	3491	CCN1	27644084	this study found that expression of Cyr61 was higher in the ectopic endometrium than in the eutopic endometrium and that Cyr61 expression in the endometrium was correlated with age, number of natural labors, blood loss, uterine volume, adenomyosis type, and concurrent endometriosis
expression analysis	3549	IHH	21640343	Nuclear and cytoplasmic endometrial expression of Indian hedgehog is decreased in women with endometriosis.
expression analysis	3552	IL1A	17919610	Defect in the local control of IL1 may be involved in the pathophysiology of endometriosis and related infertility.
SNPs	3552	IL1A	23635948	The nonsynonymous variant of IL1A might confer genetic susceptibility to endometriosis in Japanese population.
SNPs	3552	IL1A	25336714	SNPs within the IL1A gene are associated with endometriosis risk.
polymorphism	3553	IL1B	12699881	an association between the interleukin-1beta exon 5 polymorphism, endometriosis, or increased serum IL-1beta levels was not found
expression analysis	3553	IL1B	17678915	Endometrial mRNA levels of IL-1 beta and RANTES were increased in women with endometriosis compared with control subjects.
expression analysis	3553	IL1B	22537218	higher secretion by peritoneal macrophages in endometriosis
expression analysis	3553	IL1B	24974860	IL-1beta is suggested to stimulate tryptophan catabolism and production of IL-6 and IL-8 by increasing TDO expression in endometriosis.
expression analysis	3553	IL1B	26366788	Our findings indicate that epidermal growth factor, interleukin-1beta and angiotensin II receptor, type 1 may play important roles in the pathogenesis of endometriosis.
expression analysis	3553	IL1B	26817396	p27(kip1) overexpression regulates IL-1beta in the microenvironment of stem cells and eutopic endometriosis
expression analysis	3554	IL1R1	15472211	the dysregulation of IL-1/IL-1-R system relates to immunological dysfunction in endometriosis
polymorphism	3554	IL1R1	16911713	Distributions of single-base polymorphisms of the human IL-1RI gene were evaluated and a C-->A transition in exon 1C showed protective effect against endometriosis in heterozygotes.
expression analysis	3554	IL1R1	17324958	Our study showed an imbalance in the expression of IL1R1 and IL1R2 in eutopic, and particularly in ectopic, endometrial tissues of women with endometriosis
expression analysis	3554	IL1R1	17517439	Abnormal interleukin 1 receptor types I and II gene expression in eutopic and ectopic endometrial tissues of women with endometriosis.
polymorphism	3554	IL1R1	22509941	The IL-1R1 1498T>C polymorphism is associated with early-stage endometriosis in Korean women.
expression analysis	3556	IL1RAP	21272866	This study showed a significant downregulation of soluble interleukin-1 receptor accessory protein expression in the endometrium of women with endometriosis.
expression analysis	3556	IL1RAP	21958553	decreased protein levels in the peritoneal fluid of women with endometriosis
expression analysis	3556	IL1RAP	24935223	Data suggest serum levels of soluble IL1RAP (from alternative splicing) are down-regulated in endometriosis throughout menstrual cycle; IL1RAP levels (which peak in proliferative phase in fertile women) exhibit minor variations in endometriosis.
expression analysis	3557	IL1RN	17292896	Decreased levels of IRAP in patients with endometriosis and disease-related dysmenorrhea may play an important role in the pathogenesis of this disease.
polymorphism	3560	IL2RB	16084898	Interleukin-2 receptor beta-627*C homozygote and C allele correlate with higher susceptibility to endometriosis.
expression analysis	3565	IL4	15166131	There were no differences in IL-4 -590C/T genotypes and allele frequencies between control women and all patients with endometriosis or between control women and each subgroup of patients with endometriosis.
expression analysis	3565	IL4	18599603	proliferation of endometriotic stromal cells induced by locally produced IL-4 is involved in the development of endometriosis.
polymorphism	3569	IL6	12517591	The interleukin-6 promoter polymorphism -174 G/C does not contribute significantly to overall disease susceptibility but does predispose the carrier to distinct endometriosis with chocolate cysts
expression analysis	3569	IL6	15166129	IL-6 and sIL-6R may contribute to the pathogenesis of endometriosis-associated infertility
expression analysis	3569	IL6	16006475	IL-6 and TNFalpha are involved in the production of HGF by endometrial stromal cells and may be involved in the growth of endometriosis by an autocrine mechanism
expression analysis	3569	IL6	16564564	The results suggest that both IL-6 and GH may play a role in the progression of both endometriosis and endometrial carcinoma.
polymorphism	3569	IL6	16938116	IL-6 -634C/G and ICAM-1 469K/E polymorphisms synergistically affect the susceptibility for endometriosis in the Japanese population.
expression analysis	3569	IL6	17207568	CD14+ cells producing TNF-alpha, IL-6, IL-10, MCP-1, and IL-8 were significantly higher in peripheral blood than peritoneal fluid mononuclear cells of women with endometriosis.
expression analysis	3569	IL6	17582674	Serum of subjects with endometriosis contains significantly higher levels of interleukin-6, monocyte chemotactic protein-1, and interferon-gamma than control women.
expression analysis	3569	IL6	17953945	The significant IL-6 mRNA increase in endometriosis compared with in eutopic endometrium may play a role in the development of endometriosis.
expression analysis	3569	IL6	19129371	in eutopic endometrium from endometriosis patients expression decreases rather than increases during late secretory phase
expression analysis	3569	IL6	20074813	peritoneal fluid levels in patients with endometriosis correlate positively with pelvic pain
expression analysis	3569	IL6	22563871	Data suggest that, in post-menarche girls (13-19 years) with endometriosis, peritoneal fluid levels of IL-6 (interleukin-6), TNF-alpha (tumor necrosis factor-alpha), and glycodelin A are significantly higher than in control subjects.
polymorphism	3569	IL6	22883518	There is a significant association between genetic susceptibility to endometriosis and the combination polymorphisms of TNF-alpha -1031T/C and IL-6 -634C/G.
expression analysis	3569	IL6	23545836	Serum IL-6 with a threshold of 15.4 pg/ml was found to be able to diagnose minimal to mild endometriosis with 89.5 % sensitivity and 82.5 % specificity.
expression analysis	3569	IL6	23553197	IL-6 concentrations were significantly higher in peritoneal fluid of endometriosis patients than in controls.
polymorphism	3569	IL6	24308758	TNF-alpha and IL-6 gene polymorphisms were associated with endometriosis in Asians. [review]
expression analysis	3569	IL6	24845415	leptin and IL6 levels in peritoneal fluid correlated in endometriosis
expression analysis	3569	IL6	28779573	An increase in soluble IL-6R in peritoneal fluid promotes the development of endometriosis by enhancing the bioactivity of IL-6.
PCR	3570	IL6R	15166129	IL-6 and sIL-6R may contribute to the pathogenesis of endometriosis-associated infertility
expression analysis	3570	IL6R	28779573	An increase in soluble IL-6R in peritoneal fluid promotes the development of endometriosis by enhancing the bioactivity of IL-6.
expression analysis	3576	CXCL8	15613411	both estradiol and progesterone stimulated IL-8 mRNA and protein expression in endometrial cells from women with endometriosis
expression analysis	3576	CXCL8	17207568	CD14+ cells producing TNF-alpha, IL-6, IL-10, MCP-1, and IL-8 were significantly higher in peripheral blood than peritoneal fluid mononuclear cells of women with endometriosis.
expression analysis	3576	CXCL8	18079209	IL-17A enhances the expression of cyclooxygensase-2 and IL-8 and the proliferation of endometriotic stromal cells. IL-17A may play a role in the development of endometriosis.
expression analysis	3576	CXCL8	18314120	Findings suggest that IL-8 and MCP-1 may be involved in the pathogenesis of endometriosis.
expression analysis	3576	CXCL8	18635170	Measuring of serum IL-8 concentration may be a valuable tool in diagnosing endometriosis.
expression analysis	3576	CXCL8	19694638	neutrophils and T cells release differential levels of interferon-gamma-induced protein-10 and IL-8 in response to stimulation with peritoneal fluid obtained from patients with endometriosis
PCR	3576	CXCL8	21601196	The secretion of interleukin-8 is increased in endometriosis stimulated by interleukin-17F secretion.
expression analysis	3576	CXCL8	21831449	Increased levels of human neutrophil peptides 1, 2, and 3 in peritoneal fluid of patients with endometriosis: association with neutrophils, T cells and IL-8.
expression analysis	3576	CXCL8	21848410	both leptin and interleukin-8 levels are raised in peritoneal fluid of women with endometriosis reflecting inflammation and dysregulated immunomodulation
expression analysis	3576	CXCL8	22563025	CXCL8 and CXCR1 are involved in the pathogenesis of endometriosis by up-regulating proliferation and growth and restricting apoptosis in endometrial stromal cells by activating the PTEN/Akt pathway and mediating the expression of survivin and Bcl-2
expression analysis	3576	CXCL8	24966899	In endometriosis, TSLP is involved in estrogen mediated regulation of the secretion of MCP-1 and IL-8, and the growth of endometrial stromal cells through JNK and NF-kappaB signal pathways.
expression analysis	3576	CXCL8	25704572	observed significantly higher concentrations of IL-8 (p < 0.001), MCP-1 (p = 0.014), and MIP-3beta (p = 0.022) in the PF of women with endometriosis than in the controls.
expression analysis	3576	CXCL8	27491770	The levels of IL-8, IL-12, and adrenomedullin may be good indicators of embryo and oocyte quality in endometriosis patients undergoing IVF.
expression analysis	3577	CXCR1	15618253	In eutopic endometrium of women with endometriosis, significant increase in both proliferative and secretory phases for epithelial CXCR2 expression, and in proliferative phase for CXCR1 expression. May be involved in pathogenesis of endometriosis.
expression analysis	3577	CXCR1	22563025	CXCL8 and CXCR1 are involved in the pathogenesis of endometriosis by up-regulating proliferation and growth and restricting apoptosis in endometrial stromal cells by activating the PTEN/Akt pathway and mediating the expression of survivin and Bcl-2
expression analysis	3579	CXCR2	15618253	In eutopic endometrium of women with endometriosis, significant increase in both proliferative and secretory phases for epithelial CXCR2 expression, and in proliferative phase for CXCR1 expression. May be involved in pathogenesis of endometriosis.
polymorphism	3586	IL10	11883743	IL-10 promoter polymorphisms were associated with the production of anti-CA II ab in patients with endometriosis, suggesting a role in the genetic susceptibility for endometriosis.
expression analysis	3586	IL10	12700072	Endometriosis is associated with with an elevated level of IL-10 in the peritoneal fluid: cells resident in the peritoneum are a major source of IL-10.
polymorphism	3586	IL10	17178764	Polymorphisms at -819 and -592 sites in IL10 promoter and their protein production are associated with endometriosis risk.
expression analysis	3586	IL10	17207568	CD14+ cells producing TNF-alpha, IL-6, IL-10, MCP-1, and IL-8 were significantly higher in peripheral blood than peritoneal fluid mononuclear cells of women with endometriosis.
expression analysis	3586	IL10	18687423	The -592 or -819 C alleles of IL-10 are associated with endometriosis in a Chinese population.
polymorphism	3586	IL10	18930197	The functional promoter polymorphism at IL-10 may play a role in the development of endometriosis.
expression analysis	3586	IL10	20618176	the IL-10 ACC/ACC genotype, which is known to be a 'low-producer' of IL-10, is associated with endometriosis
polymorphism	3586	IL10	21055074	The allele C of IL-10-819 or IL-10-592 is correlated with risk of endometriosis.
expression analysis	3586	IL10	24326257	IL-10 may suppress immunity against endometrial implants, contributing to development of endometriosis.
expression analysis	3586	IL10	28971893	Suggest that the interaction between macrophages and endometrial stromal cells downregulates cytotoxicity of NK cells possibly by stimulating the secretion of IL-10 and TGF-beta, and may further trigger the immune escape of ectopic fragments and promote the occurrence and the development of endometriosis.
expression analysis	3593	IL12B	27491770	The levels of IL-8, IL-12, and adrenomedullin may be good indicators of embryo and oocyte quality in endometriosis patients undergoing IVF.
polymorphism	3593	IL12B	29738836	The rs17860508 polymorphism in the IL12B promoter region may influence the risk of developing ovarian endometriosis by altering the endometrial expression of IL12B of in Northern Chinese women.
expression analysis	3600	IL15	12571184	Peritoneal fluid IL-15 levels are increased in women with endometriosis. IL-15 levels are inversely correlated with depth of invasion and disease stage. Possible role in early pathogenesis of endometriosis.
expression analysis	3600	IL15	27190213	High IL15 expression is associated with endometriosis.
expression analysis	3603	IL16	15820794	IL-16 in peritoneal fluid may play a role in the pathogenesis of endometriosis by initiating or sustaining inflammatory responses in the peritoneal cavity
polymorphism	3603	IL16	20662556	the rs4778889 T/C polymorphism of the IL-16 gene may be associated with risk of endometriosis
expression analysis	3603	IL16	27484651	Data indicate an association between interleukin-16 (IL-16) rs4072111 and rs1131445 with progression to the severe stages (III-IV) of endometriosis.
expression analysis	3603	IL16	29328375	rs11556218 is associated with endometriosis in Greek women, probably by resulting in the aberrant expression of IL16
expression analysis	3605	IL17A	16008887	IL-17 level is associated with the pathogenesis of early endometriosis and endometriosis-associated infertility.
expression analysis	3605	IL17A	18079209	IL-17A enhances the expression of cyclooxygensase-2 and IL-8 and the proliferation of endometriotic stromal cells. IL-17A may play a role in the development of endometriosis.
expression analysis	3605	IL17A	22902060	IL-17A produced by neutrophils stimulates Gro-alpha secretion from endometrial stromal cells, thereby recruiting more neutrophils and inducing perpetuating inflammation in endometriosis.
expression analysis	3605	IL17A	26259585	endometriotic lesions produce IL-17A. removal of the lesion leads to reduction in systemic levels of IL-17A. data show an important role of IL-17A promoting angiogenesis and proinflammatory environment for establishment and maintenance of endometriosis.
expression analysis	3606	IL18	14556808	Levels significantly higher in previously untreated endometriosis. Women with superficial and deep peritoneal implants had significantly higher IL-18 levels than did women with endometriomas. Significantly higher in luteal phase than in follicular phase.
expression analysis	3606	IL18	14998974	The elevation of IL-18 in the peritoneal fluid of endometriosis patients and the induction of COX-II in peritoneal monocytes by IL-18 suggest that IL-18 plays a pathogenic role in endometriosis.
expression analysis	3606	IL18	20797704	IL-18 -607 *A homozygote and A allele were positively correlated with the risk of developing endometriosis or the stage of endometriosis
expression analysis	3606	IL18	22537218	lower secretion by peritoneal macrophages in endometriosis
expression analysis	3620	IDO1	22638210	IDO1 is possibly involved in endometriosis pathogenesis via promoting COX-2 and MMP-9 expression and regulation of endometrial stromal cells biological characteristics
expression analysis	3620	IDO1	25031694	through the activation of IL-33, the increased expression of IDO1 in ectopic endometrial stromal cells contributed to the truncated phagocytic ability of macrophages in endometriosis.
expression analysis	3620	IDO1	28260094	The aim of the present study was to clarify the effect of IDO1induced macrophages on the growth of endometrial stromal cells in endometriosis. IDO1 educated-macrophages may facilitate the survival of retrograde endometrial tissues, and be involved in the pathogenesis of endometriosis.
expression analysis	3624	INHBA	19386982	Activin A, activin receptor type II, nodal, and cripto mRNA are expressed by eutopic and ectopic endometrium in women with ovarian endometriosis.
expression analysis	3624	INHBA	21640344	Activin-A appears to promote endometriosis by stimulating interleukin-6 and protease-activated receptor-2 mRNA expression and increasing the proliferation of endometrioma stromal cells.
expression analysis	3624	INHBA	22416010	The present study demonstrated that serum activin A is not significantly altered in peritoneal or deep infiltrating endometriosis and has limited diagnostic accuracy in the diagnosis of ovarian endometrioma.
expression analysis	3627	CXCL10	18281042	Low serum and peritoneal fluid concentration of interferon-gamma-induced protein-10 (CXCL10) in women with endometriosis.
expression analysis	3627	CXCL10	19694638	neutrophils and T cells release differential levels of interferon-gamma-induced protein-10 and IL-8 in response to stimulation with peritoneal fluid obtained from patients with endometriosis
expression analysis	3646	EIF3E	28438065	These data suggest that eIF3e downregulation may be involved in epithelial-mesenchymal transition in endometriosis, possibly through preferential translation of Snail.
expression analysis	3685	ITGAV	12372469	in patients with endometriosis a significant negative correlation was observed between luminal expression of eNOS and alpha(v)beta(3) integrin and between glandular expression of eNOS and luminal expression of alpha(v)beta(3) integrin
expression analysis	3690	ITGB3	12372469	in patients with endometriosis a significant negative correlation was observed between luminal expression of eNOS and alpha(v)beta(3) integrin and between glandular expression of eNOS and luminal expression of alpha(v)beta(3) integrin
expression analysis	3725	JUN	24500404	contribution from c-Jun, c-Fos, and AP-1 effectors of mitogen-associated kinase signaling, in endometriosis, is reported.
expression analysis	3725	JUN	26394174	Data suggest PGE2 induces aromatase and ERB/ESR2 expression by interacting with c-Jun and p38a/MAPK14, thus influencing estradiol production in endometrial stromal cells; inactivation of c-Jun and p38a may be effective in treatment of endometriosis.
expression analysis	3732	CD82	21685244	Study demonstrated that the abnormal lower CD82 expression in ESCs induced by TCDD and estrogen may be an important molecular basis of endometriosis pathogenesis through enhancing the CCL2 secretion and CCR2 expression and the invasion of ESCs.
expression analysis	3732	CD82	26918694	KAI1 and KISS1 are implicated in the pathogenesis and maintenance of endometriosis.
expression analysis	3791	KDR	17765237	Vascularization and VEGF and Flk-1 expression are significantly higher in deeply infiltrating endometriosis affecting the rectum.
polymorphism	3791	KDR	23635398	The results suggested that the 1192C/T polymorphisms on the VEGFR-2 gene might affect the risk of developing endometriosis in Northern Chinese women of Han ethnicity.
expression analysis	3791	KDR	27453397	association of rs519664[T] in TTC39B on 9p22 with endometriosis, is reported.
expression analysis	3791	KDR	27836223	Our results indicate that VEGF SNPs -2578C>A and -1154G>A increase endometriosis risk, whereas VEGF +405G>C and VEGFR2 1192C>T are protective against disease development, with VEGFR2 1192C>T also reducing cyclical urinary symptoms. The combined analysis of VEGF-VEGFR2 genotypes suggests a gene-gene interaction in endometriosis susceptibility.
expression analysis	3809	KIR2DS4	25724317	KIR2DS4del presence in patients was associated with severity of endometriosis, which, due to strong negative linkage disequilibrium, may suggest an indirect effect of KIR2DS5 absence
expression analysis	3810	KIR2DS5	20865034	The presence of KIR2DS5 gene protects human from endometriosis, ankylosing spondylitis, and acute rejection of kidney graft.
expression analysis	3810	KIR2DS5	25724317	The presence ofKIR2DS5 reduced the risk of endometriosis if a female possessed alleles from group C2 of HLA-C.
expression analysis	3814	KISS1	22210725	Data suggest that the KISS1/KISS1R system may play a role in the pathophysiology of endometriosis only for a particular group of patients.
expression analysis	3814	KISS1	23550006	The development of peripherally active kisspeptin antagonists could offer a unique therapeutic agent for treating hormone-dependent disorders of reproduction, including precocious puberty, endometriosis, and metastatic prostate cancer.
expression analysis	3814	KISS1	26918694	KAI1 and KISS1 are implicated in the pathogenesis and maintenance of endometriosis.
SNPs	3845	KRAS	16973828	6 haplotype blocks were identified across the KRAS locus in endometriosis patients. No germline variants or differences in SNPs or haplotypes were seen between cases and controls.
mutation analysis	3845	KRAS	22305241	These findings support the hypothesis that endometriosis-associated and independent endometrioid adenocarcinoma may develop via different molecular pathways and that KRAS mutations have an important role only in the former tumors.
polymorphism	3845	KRAS	22307873	An inherited polymorphism of a let-7 miRNA binding site in KRAS leads to abnormal endometrial growth and endometriosis.
expression analysis	3845	KRAS	25361550	Although, the KRAS LCS6 is neither constitutional nor somatic biomarker for endometriosis, increased expression ratio of KRAS mRNA indicates its role in the implantation of endometrial tissue outside the uterine cavity.
expression analysis	3845	KRAS	25537670	K-Ras 4A expression was 2.7-fold higher in endometriosis than non-endometriosis eutopic samples; this overexpression mainly occurs through the proliferative phase of menstrual cycle
mutation analysis	3845	KRAS	28489996	KRAS mutations were found in 3 patients with endometriosis but found that lesions in deep infiltrating endometriosis, which are associated with virtually no risk of malignant transformation, harbor somatic cancer driver mutations.
expression analysis	3880	KRT19	24219598	In this study, the promising data reported in the recent literature about CK19 serving as a sufficient biomarker for endometriosis could not be verified when tested in a larger sample size.
expression analysis	3880	KRT19	25296695	Urinary cytokeratin 19 fragment, CYFRA 21-1, has limited value for clinical practice to discriminate between women with and without endometriosis.
expression analysis	3897	L1CAM	18332088	We propose that L1CAM could promote endometriosis development by increasing enervation and aggravation. L1CAM expression is higher in atypical endometriosis compared with normal endometriosis.
expression analysis	3918	LAMC2	24070183	LAMC2 is expressed at a higher level in ectopic endometrium (Ec) from women with endometriosis compared with eutopic endometrium (Eu) from women with endometriosis.
expression analysis	3925	STMN1	20819663	Stathmin is overexpressed in endometrium of patients with endometriosis and may play a role in the pathogenesis of endometriosis.
expression analysis	3952	LEP	11994543	the differential distribution of mRNA for leptin and its receptor suggests an important autocrine and paracrine role for leptin in human endometriosis.
expression analysis	3952	LEP	12773447	peritoneal fluid leptin levels are elevated in women with endometriosis, but inversely correlated with extent of disease
expression analysis	3952	LEP	16269446	Higher levels of leptin were observed in peritoneal fluid of patients with endometriosis compared to those without the disease.
expression analysis	3952	LEP	17706208	A four-marker panel of CA-125, macrophage chemotactic protein-1, leptin, and macrophage migration inhibitory factor could diagnose the presence of endometriosis with 93% accuracy.
expression analysis	3952	LEP	20047585	Elevated concentration of leptin in peritoneal fluid may contribute to the pathological process of endometriosis through activation of peritoneal macrophages.
expression analysis	3952	LEP	20825374	there was a positive correlation between leptin and MCP-1 levels in the peritoneal fluid of patients with endometriosis; conclude peritoneal leptin and MCP-1 play important roles in the pathogenesis of infertility in the early stage of endometriosis
expression analysis	3952	LEP	21848410	both leptin and interleukin-8 levels are raised in peritoneal fluid of women with endometriosis reflecting inflammation and dysregulated immunomodulation
expression analysis	3952	LEP	24845415	associated with inflammation in endometriosis
expression analysis	3952	LEP	29595066	AMH, IGF1 and leptin levels in follicular fluid have no relation to the fertility disorders caused by endometriosis or fallopian tube damage, though they are biomarkers for anovulatory fertility disorders.
expression analysis	3953	LEPR	11994543	the levels of mRNA for the long and total forms of leptin receptors were suppressed in association with the severity of endometriosis
expression analysis	3953	LEPR	23184927	Leptin receptor is induced in endometriosis and leptin stimulates the growth of endometriotic epithelial cells through the JAK2/STAT3 and ERK pathways.
expression analysis	3956	LGALS1	24979200	These results underline the essential role of Gal-1 during endometriosis
expression analysis	3958	LGALS3	21030859	overexpressed in various forms of endometriosis
expression analysis	3958	LGALS3	25069762	Gal3 was correlated with stage of endometriosis, symptom duration, Marinoff scale and VAS score in women with endometriosis.
expression analysis	3965	LGALS9	29202955	Significantly elevated Gal-9 levels were found in both minimal-mild (I-II) and moderate-severe (III-IV) stages of endometriosis in comparison with healthy controls.
expression analysis	3972	LHB	12042273	relationship between endometriosis and a variant of the beta-subunit of luteinizing hormone
polymorphism	3972	LHB	21764500	the presence of LHbeta G1502A and ERbeta G+1730A polymorphisms is associated with infertility and endometriosis associated infertility.When two polymorphisms are present it does not appear to increase the chance of developing endometriosis or infertility.
polymorphism	3973	LHCGR	25592315	A high prevalence of endometriosis, polymorphism in the LHCGR and GnRH1 and progonadoliberin-2 antibodies in serum was found among the patients with severe dysmotility after treatment with GnRH analogs.
polymorphism	3973	LHCGR	25935136	The insLQ polymorphism within LHR is associated with endometriosis and infertility.
expression analysis	3976	LIF	19545488	The results suggest that in LIF gene mutation-positive women the idiopathic infertility and endometriosis have a negative impact on the outcome of IVF treatment.
expression analysis	3976	LIF	21987111	Endometrial HOXA11 and LIF mRNA expression levels (normalized to beta-actin expression) were significantly decreased in endometrium of infertile patients with endometriosis compared with healthy fertile controls
polymorphism	3990	LIPC	24124978	The present study suggested that the LIPC-514 C/T polymorphism of the HL gene has no significant association with the risk of endometriosis in the studied Iranian women.
expression analysis	4016	LOXL1	20940247	gene expression profiles of peritoneal and ovarian endometriotic lesions compared to endometrial tissue of nonaffected women; different expression found for HTRA1 and LOXL1, upregulated in ectopic endometrium, suggesting involvement in endometriosis
expression analysis	4057	LTF	16644090	Women with minimal endometriosis had lower PF lactoferrin concentrations compared to both patients with high revised American Fertility Society classification scores and women with follicle ovarian cysts.
expression analysis	4087	SMAD2	26708185	correlation between TGFb1 and pSmad2 as well as between HtrA1 and TGFb1 and the very significant increase of Ki67 in stromal compartment of eutopic endometrium suggest a possible involvement of HtrA1 in the pathogenesis of endometriosis.
expression analysis	4088	SMAD3	25228630	Immunostaining of total SMAD3 was reduced in the endometriosis group, but the localization of pSMAD3 was not altered.
expression analysis	4192	MDK	15734764	MK may play roles, such as stimulation of endometriotic cell proliferation, in the development of endometriosis.
expression analysis	4211	MEIS1	24985084	MEIS1 is likely a key mediator between sex steroid and genes for uterine receptivity. Diminished endometrium MEIS1 expression may contribute to implantation failure in endometriosis.
expression analysis	4233	MET	23469222	MET is the most frequently amplified gene in endometriosis-associated ovarian clear cell adenocarcinoma and correlates with poor prognosis.
expression analysis	4240	MFGE8	28967712	This study showed for the first time that MFG-E8 expression is impaired in the endometrium of patients with endometriosis and infertility during the window of implantation.
expression analysis	4254	KITLG	26791471	women with endometriosis have low levels of endometrial SCF
expression analysis	4255	MGMT	29308563	The changes in MGMT expression reflect the impairment of DNA repair, which probably serves as a stage in the development and progression of endometriosis.
expression analysis	4277	MICB	25775242	This study suggests that NKG2D ligands shedding of MICA, MICB and ULBP-2 is a novel pathway in endometriosis complex pathogenesis that impairs Natural Killer Cells cell function.
expression analysis	4282	MIF	12009356	Monocyte chemotactic protein-1 and macrophage migration inhibitory factor production by peritoneal macrophages may contribute to paracrine and autocrine activation and to macrophage accumulation in peritoneal cavity of women with endometriosis.
expression analysis	4282	MIF	15820792	MIF may be involved in endometriosis-related pain and infertility
expression analysis	4282	MIF	17658526	MIF may play a physiological role in sperm capacitation but may have deleterious effects on sperm function at abnormal pathophysiological levels, and therefore may have a role in endometriosis-associated infertility.
expression analysis	4282	MIF	17706208	A four-marker panel of CA-125, macrophage chemotactic protein-1, leptin, and macrophage migration inhibitory factor could diagnose the presence of endometriosis with 93% accuracy.
expression analysis	4282	MIF	18710704	Involvement of the nuclear transcription factor NF-kappaB in MIF gene activation in ectopic endometrial cells in response to IL-1 beta and identifies a possible pathway of endometriosis-associated inflammation and ectopic cell growth.
expression analysis	4282	MIF	22649515	Specific inhibition of MIF alters endometriotic tissue growth and progression in vivo and may represent a promising potential therapeutic avenue for endometriosis.
expression analysis	4282	MIF	30074218	the expression of MMIF, HIF-1alpha, and VEGF in the serum and endometrial tissues may be used to assess the stage of endometriosis and the severity of dysmenorrhea.
expression analysis	4288	MKI67	21840910	analysis of Aurora A and B kinases, Ki-67 and the estrogen and progesterone receptors from an endometriosis tissue microarray model
expression analysis	4288	MKI67	23040923	A moderate correlation between the stage of endometriosis and the degree of Ki-67 staining was found.
expression analysis	4288	MKI67	26708185	correlation between TGFb1 and pSmad2 as well as between HtrA1 and TGFb1 and the very significant increase of Ki67 in stromal compartment of eutopic endometrium suggest a possible involvement of HtrA1 in the pathogenesis of endometriosis.
expression analysis	4292	MLH1	21556900	Epigenetic inactivation of hMLH1 was an early event in the malignant transformation of ovarian endometriosis.
expression analysis	4292	MLH1	22626277	The immunological expression of hMLH1 and hMLH2 protein decreased in the following order: endometriosis> ovarian carcinoma accompanied by endometriosis > solitary ovarian carcinoma.
expression analysis	4311	MME	23653392	CD10 might be involved in the development of endometriosis due to its influence on CD44-dependent cell adhesion.
expression analysis	4312	MMP1	12034345	destruction of the surrounding matrix by endometriosis might be caused by various MMPs, which are mainly produced in stromal cells.
expression analysis	4312	MMP1	15879464	MMP1 promoter SNP haplotype may modify susceptibility to endometriosis.
expression analysis	4312	MMP1	19345347	MMP-1 and MMP-2 are major factors involved in the invasion of endometrium into the peritoneum and in vascularization of endometriosis.
expression analysis	4312	MMP1	19661147	The deregulation of MMP9, and the TNF participation in the MMP1 and proMMP9 secretions, in the MMP9 expression and in the expression and cleavage of ICAM1 may contribute to the pathophysiology of endometriosis disease.
expression analysis	4312	MMP1	20423842	The high expression of MMP-1 and low expression of TIMP-1 in endometriotic tissues confer strong invasiveness of ectopic endometrial tissue, and may play an important role in the pathogenesis of endometriosis.
expression analysis	4312	MMP1	22024213	A single nucleotide polymorphism in the MMP1 gene significantly differed between cases and controls only when stratified by smoking status. Minor allele frequency was higher in control women who smoked than in women with endometriosis who smoked.
expression analysis	4313	MMP2	12034345	destruction of the surrounding matrix by endometriosis might be caused by various MMPs, which are mainly produced in stromal cells.
expression analysis	4313	MMP2	12372458	endometrium from women with endometriosis expressed higher levels of MMP-2 and MT1-MMP and lower levels of TIMP-2 than did endometrium from normal women
expression analysis	4313	MMP2	18177649	Report association of polymorphisms of the MMP-2 and TIMP-2 genes with the risk of endometriosis in North Chinese women.
expression analysis	4313	MMP2	18295959	Increased MMP-2 and -9 and altered beta-catenin may play a role in the pathogenesis of endometriosis.
expression analysis	4313	MMP2	19345347	MMP-1 and MMP-2 are major factors involved in the invasion of endometrium into the peritoneum and in vascularization of endometriosis.
polymorphism	4313	MMP2	20100617	Polymorphisms in MMP-2 and MMP-9 promoter regions are associated with endometriosis.
polymorphism	4313	MMP2	22985025	gene polymorphism is associated with advanced-stage endometriosis in Korean women
expression analysis	4313	MMP2	23171686	Advanced pelvic endometriosis severity is related to higher serum MMP-2 levels but does not influence follicular MMP-2 or MMP-9 levels in periovulatory follicles obtained from stimulated cycles.
expression analysis	4313	MMP2	23364396	A microRNA-520 mirSNP at the MMP2 gene influences susceptibility to endometriosis in Chinese women
expression analysis	4313	MMP2	23557756	Increases in circulating MMP-2 are associated with poor oocyte and embryo development in women with endometriosis undergoing in vitro fertilization.
polymorphism	4313	MMP2	27659332	A significant association has been found between MMP-1 -1607 1G/2G polymorphism and the susceptibility of endometriosis and adenomyosis under recessive model, while no significant association was found for MMP-2 -735 C/T, MMP-3 -1171 5A/6A and MMP-9 -1562 C/T polymorphisms. (Meta-analysis)
expression analysis	4314	MMP3	12034345	destruction of the surrounding matrix by endometriosis might be caused by various MMPs, which are mainly produced in stromal cells.
expression analysis	4314	MMP3	12832381	The increase in antigenic levels of uPA and MMP-3 in endometrium of women with endometriosis might contribute to the invasive potential of endometrial cells
expression analysis	4314	MMP3	15879464	MMP3 promoter SNP is unlikely to be associated with endometriosis in the population of North China.
expression analysis	4314	MMP3	20609072	Early induction of MMP-3 was distinct from MMP-9 during endometriosis, which was regulated by c-Fos and TIMP-3. Melatonin suppressed MMP-3 activity and amplified apoptosis while regressing endometriosis through a caspase-3 mediated pathway.
expression analysis	4314	MMP3	21150162	MMP-3 mRNA is a promising peripheral blood marker that discriminates between patients with endometriosis and healthy subjects.
expression analysis	4316	MMP7	12034345	destruction of the surrounding matrix by endometriosis might be caused by various MMPs, which are mainly produced in stromal cells.
polymorphism	4316	MMP7	16455621	The 181A/G polymorphism in MMP7 has a potential to be a susceptibility factor for endometriosis and adenomyosis.
expression analysis	4316	MMP7	20007614	MMP-7 protein expression in epithelial cells was significantly higher in red peritoneal lesions compared with that of deep infiltrating endometriosis, ovarian endometriosis and black peritoneal lesions, in all phases of the menstrual cycle.
expression analysis	4318	MMP9	12034345	destruction of the surrounding matrix by endometriosis might be caused by various MMPs, which are mainly produced in stromal cells.
expression analysis	4318	MMP9	15105396	Endometriosis-associated increase in proteolysis and imbalance between of MMP-9 and of TIMP-1 in culture medium of endometrial tissue may reflect in vivo enhanced capacity of this tissue to break down the extracellular matrix in host tissues.
expression analysis	4318	MMP9	16192641	Suppression of MMP-9 by dinoprostone in peritoneal macrophages is associated with severity of endometriosis.
expression analysis	4318	MMP9	16880228	These findings make plausible the involvement of MMP-9/TIMP-1 imbalance in the invasiveness of the endometrial tissue of patients with endometriosis and the ectopic development of the disease.
expression analysis	4318	MMP9	17888430	Expression of c-fos in the human endometrium may be regulated by 17beta-E(2), and c-fos may be involved in development of endometriosis by promoting MMP-9 gene expression and subsequently the invasive potential of endometrial explants.
expression analysis	4318	MMP9	18295959	Increased MMP-2 and -9 and altered beta-catenin may play a role in the pathogenesis of endometriosis.
expression analysis	4318	MMP9	18554596	Haplotypes in the MMP-9 gene may correlate with the progression of endometriosis.
expression analysis	4318	MMP9	19661147	The deregulation of MMP9, and the TNF participation in the MMP1 and proMMP9 secretions, in the MMP9 expression and in the expression and cleavage of ICAM1 may contribute to the pathophysiology of endometriosis disease.
polymorphism	4318	MMP9	20100617	Polymorphisms in MMP2 and 9 promoter regions are associated with endometriosis.
expression analysis	4318	MMP9	23557756	MMP-9 is increased in women with endometriosis undergoing in vitro fertilization associated with poor oocyte and embryo development.
expression analysis	4318	MMP9	25284053	Three proteins-matrix metalloproteinase-9, neutrophil elastase, and FAM49B-were significantly lower in abundance in samples from women with endometriosis.
methylation	4318	MMP9	25481181	DNA methylation at the promoter region of MMP-9 gene can enhance the expression of MMP-9 in ectopic endometrial stromal cells of endometriosis.
expression analysis	4318	MMP9	26744503	Increased concentrations of plasma and peritoneal fluid concentrations of matrix metalloproteinase-9 appear to be associated with disease severity of endometriosis and may serve as an alternative biomarker to determine disease severity of endometriosis.
expression analysis	4318	MMP9	26888969	The promotion of MMP9 by the Wnt/beta-catenin signaling pathway under the regulation of E2 may contribute to the pathophysiology of human endometriosis.
expression analysis	4323	MMP14	12372458	endometrium from women with endometriosis expressed higher levels of MMP-2 and MT1-MMP and lower levels of TIMP-2 than did endometrium from normal women
expression analysis	4323	MMP14	12587534	matrix metalloproteinase-2 and 9 and membrane-type 1 matrix metalloproteinase mRNA expression in endometriosis was higher than in normal endometrium whereas E-cadherin, alpha- and beta-catenin mRNA expression was not suppressed in endometriosis
expression analysis	4360	MRC1	27793384	Peritoneal dendritic cellss in endometriosis tissue express high levels of MR, which promotes phagocytosis of dead endometrial cells and thereby contributes to the etiology of endometriosis.
expression analysis	4485	MST1	15764806	Macrophage stimulating protein and its receptor RON are involved in the pathophysiology of endometriosis.
expression analysis	4486	MST1R	15764806	Receptor RON and uts ligand macrophage stimulating protein are involved in the pathophysiology of endometriosis.
expression analysis	4524	MTHFR	21429654	genetic association studies on endometriosis in a population of women in Poland: Data suggest interaction between an SNP in MTHFR (Ala222Val; rs1801133) and an SNP in PEMT (rs4244593) in infertile women with some indication of endometriosis.
expression analysis	4582	MUC1	24939955	MUC1, MUC4, and MUC16 expression does not vary significantly in normal endometrium during the menstrual cycle or in endometriosis relative to the epithelial marker, cytokeratin-18 (KRT18).
expression analysis	4582	MUC1	25155819	Decreased expression of MUC1 may attribute to progesterone receptor B variation in the mid-secretory phase of endometriosis endometrium; it might be one of the factors resulting in infertility in endometriosis patients
expression analysis	4582	MUC1	26246541	the diagnostic value of serum cancer antigen (CA)125, CA19-9 and CA15-3 concentrations in endometriosis, was evaluated.
expression analysis	4583	MUC2	22417007	Our data present MUC2 as a new candidate involved in development of endometriosis and related infertility
expression analysis	4585	MUC4	21349170	MUC4 polymorphisms are associated with endometriosis development and endometriosis-related infertility in the Taiwanese population.
expression analysis	4609	MYC	22884659	c-MYC mRNA/protein expression levels were increased in ectopic tissue in peritoneal endometriosis.
expression analysis	4684	NCAM1	24807109	Women, w/ or w/o endometriosis, having larger populations of cytotoxic CD16(+) uterine NK cells and/or higher populations of NKp46(+)CD56(+) cells may be at greater risk of infertility resulting from inflammatory environment during implantation or later
expression analysis	4790	NFKB1	19932734	17beta-estradiol can promote cell proliferation in endometriosis by activating PI3K/AKt pathway via an NFkappaB/PTEN-dependent pathway.
expression analysis	4790	NFKB1	20218898	This study suggests that the functional -94 insertion/deletion ATTG polymorphism in the promoter of NFKB1 is associated with an increased risk for endometriosis.
polymorphism	4790	NFKB1	22902396	In the population sample studied, the -94 insertion/deletion ATTG polymorphism in the NFKB1 gene was positively associated both with moderate/severe endometriosis and idiopathic infertility.
expression analysis	4803	NGF	21047631	the peritoneal fluid of endometriosis patients and endometriotic lesions have neurotropic properties, because the Western blot analysis and the cell culture stainings showed NGF expression
expression analysis	4803	NGF	23883529	results suggest that NGF produced locally in the peritoneal cavity may be involved in the generation of endometriosis-associated pelvic pain
expression analysis	4804	NGFR	23820422	Data suggest that expression of neuronal markers NGFp75 (p75 neurotrophin receptor), PGP9.5 (ubiquitin C-terminal hydroxylase-L1, human), and VR1 (vanilloid receptor 1) in endometrium of women is independent of presence of endometriosis.
expression analysis	4804	NGFR	27519317	The receptors p75 and TrkB are more highly expressed in deep infiltrating endometriosis than in peritoneal tissues.
expression analysis	4830	NME1	23856325	Abnormally low expression of NME1 in endometrial stromal cells (ESCs) may be involved in the pathogenesis of endometriosis by up-regulating growth, adhesion and invasion of ESCs.
expression analysis	4830	NME1	24133580	abnormal lower expression of NME1 in endometriotic stromal cells leads to more secretion of IL-8 and VEGF, up-regulates the level of CD62E and CD105, and leads to angiogenesis of vascular endothelial cells, which promotes development of endometriosis.
expression analysis	4838	NODAL	19386982	Activin A, activin receptor type II, nodal, and cripto mRNA are expressed by eutopic and ectopic endometrium in women with ovarian endometriosis.
expression analysis	4846	NOS3	12372469	in patients with endometriosis a significant negative correlation was observed between luminal expression of eNOS and alpha(v)beta(3) integrin and between glandular expression of eNOS and luminal expression of alpha(v)beta(3) integrin
polymorphism	4846	NOS3	14667898	The Glu298-->Asp polymorphism of this gene is associated with endometriosis.
polymorphism	4846	NOS3	19531501	The Glu298Asp polymorphism of the NOS3 is associated with advanced stage endometriosis in the Korean population.
expression analysis	4851	NOTCH1	27389878	Data demonstrate the possible involvement of Notch1 signaling in the pathogenesis and development of endometriosis, via regulating proliferation and migration of endometrial epithelial and stromal stem cells.
expression analysis	4851	NOTCH1	28486700	Oxidative stress is correlated with hyperactivation of the ADAM17/Notch signaling pathway and a consequent increase in fibrosis in patients with endometriosis.
expression analysis	4851	NOTCH1	29398419	High NOTCH1 expression is associated with endometriosis.
expression analysis	4852	NPY	19423065	a large amount of nerves are present around the blood vessels in the endometriosis samples, and a large number of these nerves are neuropeptide-Y sympathetic nerves.
expression analysis	4891	SLC11A2	27117373	Divalent metal transporter-1 overexpression in endometriosis patients' endometrium can increase iron influx to endometrial cells, inducing oxidative stress-mediated proinflammatory signaling. In turn, endometriosis-related conditions, as iron overload and inflammation (IL-1beta), enhance endometriosis patients endometrial DMT1 expression, creating a vicious circle on DMT-1-modulated pathways.
expression analysis	4904	YBX1	22095791	High YB-1 expression could have an impact on the development and progression of endometriosis
expression analysis	4904	YBX1	26093350	Data suggest that serum YB1/YBX1 levels are significantly up-regulated in patients with endometriosis as compared to control subjects; thus, serum YB1/YBX1 level is potential diagnostic biomarker for endometriosis.
expression analysis	4914	NTRK1	19635108	Both Trk A and Trk B revealed a pattern of immunoreactivity that was more prevalent in clear cell carcinoma of the ovary and endometriosis associated with the ovary, whereas reactivity was virtually absent in the eutopic endometrium and the ovary.
expression analysis	4915	NTRK2	17873329	TrkB expression may be greater in women with endometriosis compared to women without endometriosis.
expression analysis	4915	NTRK2	19635108	Both Trk A and Trk B revealed a pattern of immunoreactivity that was more prevalent in clear cell carcinoma of the ovary and endometriosis associated with the ovary, whereas reactivity was virtually absent in the eutopic endometrium and the ovary.
expression analysis	4915	NTRK2	27519317	The receptors, TrkB and p75 are more highly expressed in deep infiltrating endometriosis than in peritoneal tissues.
expression analysis	4968	OGG1	24032711	codon 326 genotype may have a joint effect with smoking on the development of endometriosis
expression analysis	4982	TNFRSF11B	15242994	These findings suggest that the TRAIL/OPG system is involved in the pathophysiology of endometriosis, possibly affecting the apoptosis of endometriotic cells.
polymorphism	4982	TNFRSF11B	22392486	Endometriosis is not associated with DR4 gene polymorphism.
expression analysis	5021	OXTR	28049501	Oxytocin receptor (OTR) expression in the endometrial-myometrial junction (JZ) of women with endometriosis changes significantly, which may result in abnormal uterine contractile activity.
expression analysis	5024	P2RX3	28898282	P2X3 expressions in endometriosis endometrium and endometriotic lesions were significantly higher as compared with control endometrium, and positively correlated with pain.
expression analysis	5047	PAEP	17156191	Gd and cyclooxygenase-2 might play important roles in promoting neovascularization and cell proliferation in the establishment of endometriosis
expression analysis	5047	PAEP	19903048	Patients with severe dysmenorrhoea had increased peritoneal fluid TNF-alpha and glycodelin. TNF-alpha and glycodelin may play role in endometriosis and severity of menstrual pain.
expression analysis	5047	PAEP	22563871	Data suggest that, in post-menarche girls (13-19 years) with endometriosis, peritoneal fluid levels of glycodelin A, IL-6 (interleukin-6), and TNF-alpha (tumor necrosis factor-alpha) are significantly higher than in control subjects.
expression analysis	5047	PAEP	23461865	Glycodelin-A is a potentially useful biomarker for ovarian endometriosis
expression analysis	5047	PAEP	23670949	Results suggest that PP-14 may play an important role in the pathogenesis of endometriosis.
expression analysis	5047	PAEP	28683601	This study indicate that GdA is a complex glycoprotein including up to 6 different glycoforms specifically expressed during the different phase of the menstrual cycle; in pathologic conditions such as endometriosis, the expression profile is altered possibly related to the impaired endometrial receptivity.
polymorphism	5054	SERPINE1	18423526	The PAI-1 genotype distribution was similar in endometriosis patients and controls. PAI-1 levels in endometrial tissue and peritoneal fluid seem to be associated with PAI-1 4G/5G polymorphism in controls.
polymorphism	5054	SERPINE1	21306344	data suggest that, in Brazilian women, the PAI-1 4G/5G polymorphism may be associated with a risk of endometriosis-associated infertility
expression analysis	5054	SERPINE1	28758928	PAI-1 levels are increased in patients with recurrent pregnancy losses (RPL), preeclampsia, intrauterine growth restriction (IUGR), gestational diabetes mellitus (GDM) in the previous pregnancy, endometriosis and polycystic ovary syndrome (PCOS). In general, an increased expression of PAI-1 in the blood is associated with an increased risk for infertility and a worse pregnancy outcome.
expression analysis	5076	PAX2	22473392	in endometriosis patients, paired box protein Pax2 is down-regulated in the lesions compared with the eutopic tissue, possibly due to low epidermal growth factor (EGF) signalling
expression analysis	5154	PDGFA	17578349	expression level might be decreased during the secretory phase in the eutopic endometrium of women with advanced stage endometriosis
expression analysis	5167	ENPP1	29194839	this study shows that ENPP1 is biomarker candidate for endometriosis
expression analysis	5176	SERPINF1	21122834	Significantly lower levels of peritoneal fluid PEDF in patients with endometriosis compared with patients without endometriosis, suggest that peritoneal fluid PEDF plays a role in the pathogenesis of this disorder.
expression analysis	5176	SERPINF1	22051848	Lower levels of serum PEDF were found in women with endometriosis than in those without endometriosis.
expression analysis	5176	SERPINF1	22819570	Data suggest that down-regulation of PEDF expression and increased microvascular density in ovarian endometriotic lesions play roles in pathogenesis of ovarian endometriosis; lesions were compared to endometrium from patients and control subjects.
expression analysis	5196	PF4	22555803	CXCL4 insufficiency may be involved in specific inflammatory microenvironment of ovarian cancers arising in endometriosis.
expression analysis	5196	PF4	24534089	eutopic endometrial stromal cells from deep infiltrating endometriosis patients are attracted into the peritoneal cavity through the interaction between CXCR4 expressed on their membrane and CXCL12 produced in the peritoneal cavity.
expression analysis	5228	PGF	14645176	findings suggest that production of placental growth factor is sensitive to the cyclic changes in ovarian steroids and may contribute to the pathogenesis of endometriosis
polymorphism	5241	PGR	16920727	PR gene polymorphic allele +331A is associated with a reduced risk of deep infiltrating endometriosis & adenomyosis compared with healthy population controls. The PROGINS polymorphism does not seem to modify the risk of deep infiltrating endometriosis.
expression analysis	5241	PGR	17413977	This is the first report demonstrating estrogen receptors and progesterone receptors in the smooth muscle cells in smooth muscle metaplasia outside the endometriotic foci of rectovaginal endometriosis.
expression analysis	5241	PGR	17484509	progesterone receptor heterozygosis genotype frequencies were shown to be statistically higher in endometriosis cases compared with controls
polymorphism	5241	PGR	17522428	306bp Alu insertion polymorphism in intron 7 can be considered as a predisposing risk marker for breast cancer but not for endometriosis and uterine fibroids
expression analysis	5241	PGR	17965625	Progesterone resistance in endometriosis in general and the down regulation of PR-B, but not PR-A, in particular, are a result of promoter hypermethylation of PR-B, but not PR-A.
expression analysis	5241	PGR	18048499	ERbeta/ERalpha mRNA was significantly elevated in endometriosis. Expression of PR-C mRNA relative to PR-A and PR-B mRNA was significantly increased in endometriosis.
expression analysis	5241	PGR	18249378	This suggests that PR-B knockdown might be responsible, at least in part, for increased proliferation and resistance to apoptosis as seen in the eutopic and ectopic endometrium of women with endometriosis.
polymorphism	5241	PGR	18281038	We excluded any relationship between endometriosis in general and the P receptor +331G/A polymorphism.
expression analysis	5241	PGR	19217090	Expression of estrogen (ER) and progesterone (PR) receptors in the smooth muscle component (SMC) of deep infiltrating endometriosis.
expression analysis	5241	PGR	21269613	The higher PR-A and ER-alpha gene expression in granulosa cells in patients with endometriosis, compared with patients with tubal infertility, might be a leading cause of ovarian dysfunction due to endometriosis
expression analysis	5241	PGR	21397694	Differential expression of 4 out of 5 genes related to estrogen metabolism and action (ESR1, ESR2, PGR and BGN) was confirmed in endometriosis.
polymorphism	5241	PGR	21751163	there is a significant correlation between progesterone receptor gene polymorphism and endometriosis.
expression analysis	5241	PGR	21840910	analysis of Aurora A and B kinases, Ki-67 and the estrogen and progesterone receptors from an endometriosis tissue microarray model
polymorphism	5241	PGR	22613790	In this review, the results suggest that HSD17B1 and PR polymorphism may play a role in the risk of endometriosis
methylation	5241	PGR	24481237	The present study aimed to gain further insight into the DNA methylation patterns of alternative promoters of the steroid receptor genes ESR1, ESR2 and PGR in intestinal deep endometriosis.
expression analysis	5241	PGR	24943061	the results showed trend towards an increased risk of the variant PROGINS allele and susceptibility for the endometriosis.
expression analysis	5241	PGR	24945100	Data suggest expression of PGR in endometrium in women with endometriosis may be biomarker for subsequent fertility; PGR levels in normal range or up-regulated are indicative of fertility following medical or surgical treatment.
expression analysis	5241	PGR	25155819	Decreased expression of MUC1 may attribute to progesterone receptor B variation in the mid-secretory phase of endometriosis endometrium
expression analysis	5241	PGR	25217304	Progesterone receptor is strongly expressed in rectosigmoid endometriosis tissue.
expression analysis	5241	PGR	26037298	Endometriotic lesions/eutopic endometrium from women with endometriosis are uniform in a PR-A-dominant state. Menstrual efflux of a PR-A-dominant endometrial tissue into the peritoneal cavity may play a role in the pathophysiology of endometriosis.
expression analysis	5241	PGR	27593876	PR-B expression was significantly reduced in the eutopic endometrium (p=0.031) and ovarian endometrioma (p=0.036) from women with advanced-stage endometriosis compared with eutopic endometrium tissues from control subjects.
expression analysis	5245	PHB	25444511	Knockdown of prohibitin expression promotes glucose metabolism in eutopic endometrial stromal cells from women with endometriosis.
expression analysis	5265	SERPINA1	25667209	Suggest the possible involvement of alpha1-AT in the pathophysiology of endometriosis.
expression analysis	5290	PIK3CA	26276776	Distinct beta-catenin and PIK3CA mutation are linked in endometriosis-associated ovarian endometrioid and clear cell carcinomas
expression analysis	5328	PLAU	12832381	The increase in antigenic levels of uPA and MMP-3 in endometrium of women with endometriosis might contribute to the invasive potential of endometrial cells
expression analysis	5328	PLAU	14644829	Increased uPa hydrolysis was associated with endometriotic lesion in patients diagnosed with endometriosis.
expression analysis	5328	PLAU	16855359	review of the expression of the plasminogen activator system in endometriosis
expression analysis	5347	PLK1	18353325	Cyclin B1 and Plk1 may play important roles in the pathogenesis of endometriosis by mediating ectopic endometrial cell proliferation under regulation of ovarian hormones.
expression analysis	5444	PON1	18000171	PON-1 activity was significantly lower whereas lipid hydroperoxide levels were significantly higher in women with moderate to severe endometriosis than in women with minimal to mild endometriosis.
expression analysis	5460	POU5F1	27881125	Increased expression of epithelial OCT4, SOX15 and TWIST1 was detected in endometriotic tissue compared to endometriosis patient endometrium. Epithelial expression of OCT4, SOX15, and TWIST1 was increased in the endometrium of endometriosis patients compared to controls.
expression analysis	5468	PPARG	12620489	PPAR-gamma may play a role in the pathogenesis of endometriosis related to the production of IL-6 and some other cytokines.
expression analysis	5468	PPARG	16725353	results suggest that the peroxisome proliferative activated receptor-gamma 161CC genotype could be a genetic risk factor for adenomyosis and endometriosis
polymorphism	5468	PPARG	20560917	Results suggest that the PPAR-gamma Pro12Ala polymorphism is associated with advanced-stage endometriosis in the Korean population.
expression analysis	5594	MAPK1	18559923	Abnormally high levels of ERK1/2 activity may be involved in endometriosis, possibly by stimulating endometrial cell survival.
expression analysis	5594	MAPK1	24923883	Lipoxin A4 suppresses the development of endometriosis in an ALX receptor-dependent manner via the p38 MAPK pathway
expression analysis	5595	MAPK3	18559923	Abnormally high levels of ERK1/2 activity may be involved in endometriosis, possibly by stimulating endometrial cell survival.
expression analysis	5654	HTRA1	20940247	gene expression profiles of peritoneal and ovarian endometriotic lesions compared to endometrial tissue of nonaffected women; different expression found for HTRA1 and LOXL1, upregulated in ectopic endometrium, suggesting involvement in endometriosis
expression analysis	5654	HTRA1	26708185	correlation between TGFb1 and pSmad2 as well as between HtrA1 and TGFb1 and the very significant increase of Ki67 in stromal compartment of eutopic endometrium suggest a possible involvement of HtrA1 in the pathogenesis of endometriosis.
expression analysis	5728	PTEN	16676097	The negative expression of PTEN in ovarian endometriosis without atypia (EN), ovarian endometriosis with atypia (EA), and endometriosis with adjacent ovarian carcinoma (ET) is a manifestation of the inactivation of this gene.
expression analysis	5728	PTEN	17563403	It is unlikely that the EMX2 or PTEN gene variants investigated contribute to risk for initiation and/or development of endometriosis.
expression analysis	5728	PTEN	17713092	decreased protein expressions due to increased MMAC gene mutation in advanced endometriosis and ovarian cancers were not observed; a significant difference in MMAC immunostaining between endometriosis and ovarian endometriod adenocarcinoma was seen
expression analysis	5728	PTEN	19932734	17beta-estradiol can promote cell proliferation in endometriosis by activating PI3K/AKt pathway via an NFkappaB/PTEN-dependent pathway.
expression analysis	5728	PTEN	22563025	CXCL8 and CXCR1 are involved in the pathogenesis of endometriosis by up-regulating proliferation and growth and restricting apoptosis in endometrial stromal cells by activating the PTEN/Akt pathway and mediating the expression of survivin and Bcl-2
expression analysis	5728	PTEN	24154570	PTEN and the PI3K/Akt-Bad axis may have a role in the pathogenesis of endometriosis
expression analysis	5728	PTEN	27481051	Structural mutation analysis of PTEN and its genotype-phenotype correlations in endometriosis and cancer have been presented.
expression analysis	5728	PTEN	27744455	PTEN inhibits the occurrence and development of endometriosis by regulating angiogenesis and the apoptosis and cell cycle of endometrial cells.
expression analysis	5733	PTGER3	20452033	downregulated in endometriosis tissues
expression analysis	5740	PTGIS	20452033	downregulated in endometriosis tissues
expression analysis	5743	PTGS2	14505259	High COX-2 expression in extragenital endometriosis is believed to be strongly correlated with the pathological abnormalities of this disease.
expression analysis	5743	PTGS2	15533352	Elevated Cox-2 expression in stromal cells in eutopic endometrium from patients with deep endometriosis may play a role in severe, endometriosis-related dysmenorrhea.
expression analysis	5743	PTGS2	15979990	COX-2 may have a role in preventing relapse of endometriosis after laparoscopic ablation
expression analysis	5743	PTGS2	16456945	COX-2 over-expression rate was greater in ovarian carcinoma that was associated with endometriosis than in isolated ovarian carcinoma.
expression analysis	5743	PTGS2	17156191	glycodelin and COX-2 might play important roles in promoting neovascularization and cell proliferation in the establishment of endometriosis
expression analysis	5743	PTGS2	17295901	Results suggest that expression of microsomal PGES in addition to COX-2 plays a role in increasing PGE(2) production in endometriosis.
expression analysis	5743	PTGS2	18048499	COX-2 expression was increased in women with endometriosis as compared with control endometrium.
expression analysis	5743	PTGS2	18053993	Cyclooxygenase-2 and VEGF were closely correlated with each other, and both of them appear to play a role in the angiogenesis of ovarian endometriosis.
expression analysis	5743	PTGS2	18079209	IL-17A enhances the expression of cyclooxygensase-2 and IL-8 and the proliferation of endometriotic stromal cells. IL-17A may play a role in the development of endometriosis.
expression analysis	5743	PTGS2	18367179	Cyclooxegenase-2 overexpression, along with previous medical treatment of endometriosis and the presence of adhesion, is predictive of recurrence of ovarian endometrioma within 30 months after surgery.
expression analysis	5743	PTGS2	19647233	Lipopolysaccharide promotes the proliferation and invasion of endometrial stromal cells via up-regulation of COX-2 and PGE2 expression, suggesting that pelvic inflammation may promote the progression of endometriosis.
expression analysis	5743	PTGS2	19917472	Cyclooxygenase-2 is expressed in the majority of endometriosis, but differences exist within the frequency of overexpression at different anatomical sites of the endometriosis.
expression analysis	5743	PTGS2	20068324	Cox-2 may be involved in the pathogenesis and progression of endometriosis.
expression analysis	5743	PTGS2	21145050	Peritoneal fluid of patients with endometriosis promotes proliferation of endometrial stromal cells and induces COX-2 expression.
expression analysis	5743	PTGS2	22587873	The COX-2 C allele (-765G/C) was associated with significantly lower risk of advanced-stage endometriosis in Korean women.
expression analysis	5743	PTGS2	22608095	The hypomethylation within the promoter of COX-2 may be responsible for the elevated gene expression in eutopic endometrium of endometriosis.
expression analysis	5743	PTGS2	23239446	The aberrant COX-2 and PGE(2) production play important roles in the pathogenesis of endometriosis.
expression analysis	5743	PTGS2	26054111	Genetic variation of G to A at -1195 locus in the promoter region of COX-2 gene increases the risk of endometriosis and adenomyosis.
expression analysis	5743	PTGS2	26153366	The present study identified that in Brazilian women the presence of the ancestral allele, -765G, of the COX-2 gene is associated with an increased risk for development of moderate/severe endometriosis associated with fertility.
expression analysis	5743	PTGS2	26276091	study demonstrated that DNA hypomethylation of the NF-IL6 site within the promoter of COX-2 gene could be a key mechanism for its elevated expression in the eutopic and ectopic tissues of endometriosis.
expression analysis	5747	PTK2	25973072	FAK expression in endometrial stromal cells from endometriosis was more sensitive to estrogen, which might contribute to the pathogenesis and progress of endometriosis.
expression analysis	5925	RB1	16616093	Differences in oncoprotein expression between endometriotic and adenomyotic tissues provide further evidence that the pathogenesis of endometriosis is different from that of adenomyosis.
expression analysis	5970	RELA	17889859	Activation of nuclear factor-kappa B p65 subunit is increased in peritoneal macrophages from patients with endometriosis.
expression analysis	5970	RELA	22196717	NF-kappaB activity is constitutive, physiologic, and variable in human endometrium. The physiologic cyclic p65 activation pattern was altered in endometriosis patients.
expression analysis	5970	RELA	24118362	The nuclear expression of NF-kappaB p65 is increased in the eutopic endometrium and ovarian endometrioma of women with advanced stage endometriosis, which strongly suggests that NF-small ka, CyrillicB signaling plays a crucial role in the pathophysiology of endometriosis.
expression analysis	6013	RLN1	20655530	Endometrial expression of relaxin and its receptor in endometriosis.
expression analysis	6093	ROCK1	25940707	17beta-estradiol induces proliferation of uterine smooth muscle cells in endometriosis through hyperactivation of the estrogen receptor-RhoA/ROCK signaling pathway.
expression analysis	6275	S100A4	22147918	investigation of expression of S100A4, S100P, and AGR2 at cellular level within endometrium of normal fertile women across menstrual cycle and comparison with expression in eutopic and peritoneal ectopic endometrial tissue in endometriosis
expression analysis	6286	S100P	22147918	investigation of expression of S100P, S100A4, and AGR2 at cellular level within endometrium of normal fertile women across menstrual cycle and comparison with expression in eutopic and peritoneal ectopic endometrial tissue in endometriosis
expression analysis	6346	CCL1	17693327	The combination of 17beta-E(2) with the environmental pollutant TCDD is involved in the pathogenesis of endometriosis via up-regulating the chemokine CCR8-I-309.
expression analysis	6347	CCL2	12009356	Monocyte chemotactic protein-1 and macrophage migration inhibitory factor production by peritoneal macrophages may contribute to paracrine and autocrine activation and to macrophage accumulation in peritoneal cavity of women with endometriosis.
expression analysis	6347	CCL2	12372466	first report of monocyte chemotactic protein-1 expression in mesothelial cells induced by oxidized LDL, and provides direct evidence of inflammatory action of peritoneal fluid of women with endometriosis
expression analysis	6347	CCL2	16997300	Women with endometriosis-associated infertility have a poor IVF outcome.
expression analysis	6347	CCL2	17207568	CD14+ cells producing TNF-alpha, IL-6, IL-10, MCP-1, and IL-8 were significantly higher in peripheral blood than peritoneal fluid mononuclear cells of women with endometriosis.
expression analysis	6347	CCL2	17582674	Serum of subjects with endometriosis contains significantly higher levels of interleukin-6, monocyte chemotactic protein-1, and interferon-gamma than control women.
expression analysis	6347	CCL2	17706208	A four-marker panel of CA-125, macrophage chemotactic protein-1, leptin, and macrophage migration inhibitory factor could diagnose the presence of endometriosis with 93% accuracy.
expression analysis	6347	CCL2	18314120	Findings suggest that IL-8 and MCP-1 may be involved in the pathogenesis of endometriosis.
expression analysis	6347	CCL2	20825374	there was a positive correlation between leptin and MCP-1 levels in the peritoneal fluid of patients with endometriosis; conclude peritoneal leptin and MCP-1 play important roles in the pathogenesis of infertility in the early stage of endometriosis
expression analysis	6347	CCL2	22381103	The ability of 17beta-estradiol (E2) to modulate MCP-1 production is impaired in endometriosis peritoneal fluid (ePF)-treated monocytes. Failure of E2 to suppress ePF-treated production of MCP-1 may be involved in the pathogenesis of endometriosis.
expression analysis	6347	CCL2	23474119	The levels of MCP-1 in peritoneal fluid are higher in the control group than those of the endometriosis group. The levels of MCP-1 in patients with stage II endometriosis are significantly lower in comparison with stage III and stage IV endometriosis.
expression analysis	6347	CCL2	24966899	In endometriosis, TSLP is involved in estrogen mediated regulation of the secretion of MCP-1 and IL-8, and the growth of endometrial stromal cells through JNK and NF-kappaB signal pathways.
expression analysis	6347	CCL2	25704572	observed significantly higher concentrations of IL-8 (p < 0.001), MCP-1 (p = 0.014), and MIP-3beta (p = 0.022) in the PF of women with endometriosis than in the controls.
expression analysis	6352	CCL5	12200463	functional AhR are present in endometrial and endometriotic stromal cells and that TCDD up-regulates the expression of RANTES, providing a possible mechanistic link between dioxin exposure and chemokine expression in endometriosis.
polymorphism	6352	CCL5	12837926	Data are consistent with the lack of association between RANTES polymorphisms and endometriosis, but do not exclude a possible role of other variants within the RANTES gene in this pathology.
expression analysis	6352	CCL5	16997300	Women with endometriosis-associated infertility have a poor IVF outcome.
expression analysis	6352	CCL5	17678915	Women with endometriosis had increased peritoneal mRNA expression of RANTES and VCAM-1 during menstrual compared with luteal phase.
expression analysis	6352	CCL5	18953865	Endometrial stromal cells, peritoneal mesothelial cells and monocytes of patients with endometriosis promote the secretion of RANTES in autocrine and paracrine manners.
expression analysis	6352	CCL5	20732991	higher levels of RANTES in the ectopic milieu facilitate the onset and progression of endometriosis by macrophage recruitment and tolerance that in turn inhibits apoptosis and enhances growth of endometrial stromal cells
expression analysis	6352	CCL5	23219091	Elevated immunoreactivity of RANTES and CCR1 correlate with the severity of stages and dysmenorrhea in women with deep infiltrating endometriosis.
expression analysis	6356	CCL11	19338989	IL-4 induces eotaxin in ectopic endometrial stromal cells, which might promote angiogenesis and subsequent development of endometriosis.
expression analysis	6361	CCL17	28383711	Data suggest that high levels of CCL17 and CCL22 in endometrium in women with endometriosis promote (1) recruitment of Tregs, (2) immunosuppression of Tregs, and (3) angiogenesis in endometrium. (Tregs = regulatory T cells)
expression analysis	6363	CCL19	25704572	observed significantly higher concentrations of IL-8 (p < 0.001), MCP-1 (p = 0.014), and MIP-3beta (p = 0.022) in the PF of women with endometriosis than in the controls.
expression analysis	6363	CCL19	28856757	these data indicate CCL19/CCR7 contributes to proliferation and invasion of ESCs, which are conducive to the pathogenesis of endometriosis through activating PI3K/Akt pathway
expression analysis	6366	CCL21	20797713	We found an association of CCL21 (rs2812378) and HLA-DRB1 (rs660895) with moderate to severe endometriosis
expression analysis	6367	CCL22	28383711	Data suggest that high levels of CCL17 and CCL22 in endometrium in women with endometriosis promote (1) recruitment of Tregs, (2) immunosuppression of Tregs, and (3) angiogenesis in endometrium. (Tregs = regulatory T cells)
expression analysis	6370	CCL25	20081876	over-expressed TECK interacts with CCR9 on the endometrial stromal cells in the endometriotic milieu, which may contribute to the onset and progression of endometriosis.
expression analysis	6374	CXCL5	14967364	ENA-78 may contribute to the pathogenesis of endometriosis, possibly promoting neovascularization.
expression analysis	6376	CX3CL1	24427339	higher levels of FKN secreted by eutopic endometrial stromal cells facilitate the onset and progression of endometriosis
expression analysis	6376	CX3CL1	27553970	high levels of fractalkine in ectopic endometrium taken from patients with endometriosis promoted proliferation and invasion of endometrial stromal cells through activating AKT and p38 signal pathways
expression analysis	6385	SDC4	27041028	The upregulation of syndecan-4 in the eutopic endometrium of endometriosis patients may facilitate the pathogenetic process by promoting invasive cell growth via Rac1, MMP3, and ATF-2.
expression analysis	6387	CXCL12	24534089	eutopic endometrial stromal cells from deep infiltrating endometriosis patients are attracted into the peritoneal cavity through the interaction between CXCR4 expressed on their membrane and CXCL12 produced in the peritoneal cavity.
expression analysis	6387	CXCL12	25957946	The estradiol-CXCL12/CXCR4 signaling pathway may be useful in determining treatments for endometrial disorders, and may be antagonized to block stem cell migration to endometriosis.
expression analysis	6387	CXCL12	27729562	The level of CXCR4 protein expression was significantly higher in all cellular compartments of the endometriotic lesions compared to control endometrium. CXCL12 protein expression was also higher in endometriotic lesions and was greatest in the epithelial compartment. CXCL12 was increased more in the condition media of cultured endometriosis than in controls as measured by ELISA.
expression analysis	6387	CXCL12	27959395	The present study evaluated key miRNAs in CXCL12stimulated endometrial stromal cells (ESCs), and investigated the underlying cellular regulatory mechanisms of CXCL12 in endometriosis by building networks between miRNAs, genes and gene ontologies (GOs).
expression analysis	6401	SELE	27433816	ELAM-1 upregulation may promote disorder in adhesion, and migration of the cells leading to the endometriosis disorder.
expression analysis	6405	SEMA3F	27558236	in situ hybridization analysis revealed that Sema 3C and Sema 3F are expressed at the RNA level in the endometriosis affected peritoneum
expression analysis	6446	SGK1	26827666	SGK1 overexpression in tissues and serum was found in patients with endometriosis.
expression analysis	6464	SHC1	19055724	In human endometriosis, the PI3K-Akt and MAPK signaling pathways may be activated via overexpression of AXL and SHC1, respectively.
expression analysis	6586	SLIT3	25051436	Estrogen-dependent expression of SLIT3 may play a key role in regulating nerve-vessel interactions within the complex microenvironment of endometriosis lesions.
expression analysis	6591	SNAI2	26198055	We found that TWIST1, SNAIL and SLUG are overexpressed in endometriosis
expression analysis	6615	SNAI1	26198055	We found that TWIST1, SNAIL and SLUG are overexpressed in endometriosis
expression analysis	6623	SNCG	18849443	suggest an up-regulation of dioxin-inducible CYP1A1 and gamma-SYN occurs in endometriosis
expression analysis	6647	SOD1	25947891	Infertile women with moderate/severe endometriosis showed increased expression of the SOD1 in cumulus cells.
expression analysis	6657	SOX2	20850729	expression of pluripotency factors SOX-2, OCT-4, KLF-4, and NANOG was analyzed in the endometrium, myometrium and endometriotic tissue of 36 patients; aberrant expression of SOX-2 may indicate a stem cell origin of endometriosis
expression analysis	6657	SOX2	24884521	Data suggest that expression of SOX2 and Nanog homeobox protein is up-regulated in endometriotic ovary tissue of women with ovarian endometriosis as compared to endometrial tissue from these women or from infertile women without endometriosis.
expression analysis	6665	SOX15	27881125	Increased expression of epithelial OCT4, SOX15 and TWIST1 was detected in endometriotic tissue compared to endometriosis patient endometrium. Epithelial expression of OCT4, SOX15, and TWIST1 was increased in the endometrium of endometriosis patients compared to controls.
expression analysis	6696	SPP1	19260859	expression in endometrial tissue is higher in women with endometriosis than in controls
expression analysis	6696	SPP1	23545719	the expression and localisation of the proteins, osteopontin (OPN) and prominin-1 (CD133), as well as the plasma OPN levels in the endometrium of patients with endometriosis, were investigated.
expression analysis	6696	SPP1	27678100	Results also show a decrease in serum osteopontin levels in women with associated deep infiltrating endometriosis and focal adenomyosis compared to women with superficial peritoneal endometriosis.
expression analysis	6714	SRC	22660634	A previously unidentified 70-kDa SRC-1 proteolytic isoform is highly elevated both in the endometriotic tissue of mice with endometriosis and in endometriotic stromal cells biopsied from patients with endometriosis.
expression analysis	6751	SSTR1	20739383	Overexpressed in endomterium inendometriosis.
expression analysis	6755	SSTR5	20739383	Overexpressed in endomterium inendometriosis.
expression analysis	6770	STAR	18583320	PGE(2)-induced StAR promoter activity appears to be regulated by CREB and C/EBPbeta in a cooperative manner in ectopic human endometriotic stromal cells, providing a molecular framework for the etiology of endometriosis.
expression analysis	6770	STAR	19930843	Increased steroidogenic acute regulatory protein expression is associated with endometriosis severity.
expression analysis	6774	STAT3	23461823	Interactions between M2 macrophages and endometrial stromal cells via Stat3 activation may play an important role in the development of endometriosis.
expression analysis	6774	STAT3	25750101	aberrant activation of STAT3 signaling plays an important role in the pathogenesis of endometriosis
expression analysis	6775	STAT4	27235632	Our results for the first time showed a significant association between STAT4 rs7582694 alleles and genotypes and susceptibility to endometriosis in a population.
expression analysis	6778	STAT6	17213269	STAT6 may contribute to disease susceptibility in endometriosis
expression analysis	6781	STC1	27322879	STC1 protein is significantly up-regulated in midsecretory endometrial fluid and is dysregulated in eutopic endometrial tissue from women with endometriosis. It is likely regulated by cAMP and may be involved in the pathogenesis of decidualization defects.
expression analysis	6783	SULT1E1	26723541	Effects of steroid hormone on estrogen sulfotransferase and on steroid sulfatase expression in endometriosis tissue and stromal cells
expression analysis	6790	AURKA	21840910	analysis of Aurora A and B kinases, Ki-67 and the estrogen and progesterone receptors from an endometriosis tissue microarray model
expression analysis	6811	STX5	21715015	serum anti-STX5 autoantibody, which was discovered by a proteomic approach, is a potential new serum marker for the diagnosis of endometriosis.
expression analysis	6868	ADAM17	28486700	Oxidative stress is correlated with hyperactivation of the ADAM17/Notch signaling pathway and a consequent increase in fibrosis in patients with endometriosis.
polymorphism	6869	TACR1	19903051	Polymorphism rs811 seems to be associated with lower recurrence risk in endometriosis patients. There might be clinical relevant role of NK1 pathway in pain perception of endometriosis patients.
expression analysis	6872	TAF1	21819230	In the Brazilian population, genetic variations in both uPA and TAFI were not relevant to endometriosis and/or infertility.
expression analysis	6885	MAP3K7	19410630	TNFalpha and its downstream TAK1, which are key mediators for NF-kappaB and MAPK pathways, may be involved in the pathogenesis of endometriosis.
expression analysis	6928	HNF1B	22591187	HNF-1beta in endometriosis might be a factor that controls the cell cycle and DNA damage checkpoints. [review]
expression analysis	6928	HNF1B	28214017	rs11651755 in HNF1B was found to be associated with endometriosis in this case-control study.
expression analysis	6997	TDGF1	19386982	Activin A, activin receptor type II, nodal, and cripto mRNA are expressed by eutopic and ectopic endometrium in women with ovarian endometriosis.
expression analysis	6997	TDGF1	21496809	Disturbed expression of endometrial activin A, cripto , and follistatin suggests a dysfunction of the activin pathway in endometriosis/endometrioma.
expression analysis	6997	TDGF1	25228630	Report lower gene expression of Cripto in endometriosis but difference not maintained at protein level.
expression analysis	6999	TDO2	24974860	IL-1beta is suggested to stimulate tryptophan catabolism and production of IL-6 and IL-8 by increasing TDO expression in endometriosis.
expression analysis	7015	TERT	17077107	This study showed the overexpression of hTERT mRNA and telomerase activity in the endometrium of endometriosis patients. These finding suggest that replication potential of endometrial cells may have an important role in the pathogenesis of endometriosis.
expression analysis	7015	TERT	18288381	Genome-wide, high-resolution array-CGH was used to screen for genomic aberrations in endometriosis.
expression analysis	7015	TERT	21982438	Discussion of hypothesis that endometriosis is caused by interaction of epidermal growth factor (EGF) genotype variability and telomerase activity; shortening of telomeres (prevented by telomerase) regulates cell division and apoptosis. [LETTER]
expression analysis	7015	TERT	24321595	There was an association between the expression of telomerase and the genesis and progression of endometriosis.
expression analysis	7033	TFF3	27330011	This study provides the first evidence that TFF3 is locally elevated in the peritoneal cavity in endometriosis and might play a role in disease pathogenesis and its associated inflammatory processes. Furthermore, the results show that TFF3 is regulated through the menstrual cycle.
polymorphism	7040	TGFB1	16144297	Association of endometriosis with TGF-B 1-509 gene polymorphism exists. T homozygote and T allele for TGF-B1 are associated with higher susceptibility to endometriosis.
polymorphism	7040	TGFB1	17644809	An association between the -509C/T polymorphism of the TGF-beta 1 gene and an increased risk of deep infiltrating endometriosis.
expression analysis	7040	TGFB1	21546388	TGF-beta1-induced increase in PAR2 expression may be an elaborate mechanism that augments the progression of endometriosis.
polymorphism	7040	TGFB1	21623988	The TC haplotype allele of TGFB1-509C/T and 868T/C polymorphisms may be associated with early-stage endometriosis in Korean women.
expression analysis	7040	TGFB1	22633168	genetic association studies: Meta-analyses of available data suggest that the association between TGF-beta1 -509C/T SNP and genetic predisposition to endometriosis is not significant. [META-ANALYSIS; REVIEW]
expression analysis	7040	TGFB1	24796928	The aim of this study was to determine whether TGF-beta induces a "Warburg-like" effect in peritoneal endometriosis.
expression analysis	7040	TGFB1	26354330	MAPK and TGFB[Transforming Growth Factor beta1]/SMAD signaling pathway may be important molecular mechanism underlying the pathogenesis of endometriosis
expression analysis	7040	TGFB1	26577912	Peritoneal VEGF-A expression is regulated by TGF-beta1 through an ID1 pathway in women with endometriosis
expression analysis	7040	TGFB1	26708185	correlation between TGFb1 and pSmad2 as well as between HtrA1 and TGFb1 and the very significant increase of Ki67 in stromal compartment of eutopic endometrium suggest a possible involvement of HtrA1 in the pathogenesis of endometriosis.
expression analysis	7041	TGFB1I1	19389829	The data suggest that the proposed progesterone resistance in endometrium from women with endometriosis derives, in part, from impaired expression of the PR coactivator, Hic-5, in endometrial tissue and cultured endometrial stromal fibroblasts.
polymorphism	7046	TGFBR1	28277133	rs334348 polymorphism may influence individual's susceptibility to endometriosis and its severity
expression analysis	7057	THBS1	19732880	In endometrial stromal cells from endometriosis patients TSP-1 levels were decreased by estradiol and increased by progesterone.
expression analysis	7076	TIMP1	16880228	These findings make plausible the involvement of MMP-9/TIMP-1 imbalance in the invasiveness of the endometrial tissue of patients with endometriosis and the ectopic development of the disease.
expression analysis	7076	TIMP1	20423842	The high expression of MMP-1 and low expression of TIMP-1 in endometriotic tissues confer strong invasiveness of ectopic endometrial tissue, and may play an important role in the pathogenesis of endometriosis.
expression analysis	7076	TIMP1	23557756	TIMP-1 expression is decreased in woman with endometriosis undergoing in vitro fertilization associated with poor oocyte and embryo development.
expression analysis	7077	TIMP2	12372458	endometrium from women with endometriosis expressed higher levels of MMP-2 and MT1-MMP and lower levels of TIMP-2 than did endometrium from normal women
polymorphism	7077	TIMP2	18177649	Report association of polymorphisms of the MMP-2 and TIMP-2 genes with the risk of endometriosis in North Chinese women.
polymorphism	7077	TIMP2	22985025	gene polymorphism is associated with advanced-stage endometriosis in Korean women
expression analysis	7078	TIMP3	25819812	The miR-191-TIMP3 axis might be critical in the malignant transformation of endometriosis to endometriosis-associated ovarian cancer.
expression analysis	7097	TLR2	26177128	The results obtained may be indicative of an important role of TLR2 and TLR4 in the development of endometrioid ectopia and should be considered while treating infertility in women with endometriosis.
expression analysis	7098	TLR3	18775079	Our data suggest an involvement of TLR3 and TLR4 in endometrial diseases as demonstrated by altered expression levels in endometriosis and endometrial cancer.
expression analysis	7099	TLR4	18596029	Human heat-shock protein 70 is involved in TLR4-mediated growth of endometrial cells derived from women with endometriosis.
expression analysis	7099	TLR4	18775079	Our data suggest an involvement of TLR3 and TLR4 in endometrial diseases as demonstrated by altered expression levels in endometriosis and endometrial cancer.
expression analysis	7099	TLR4	21214494	This study demonstrates an association for the first time between TLR4 896AG polymorphism, the GG genotype, and the G allele in women with endometriosis.
expression analysis	7099	TLR4	23252918	Relationship between TLR4 and mPGES-1 mRNA in endometriotic lesions indicate that innate immunity may play an important role in the pathogenesis of endometriosis.
expression analysis	7099	TLR4	26177128	The results obtained may be indicative of an important role of TLR2 and TLR4 in the development of endometrioid ectopia and should be considered while treating infertility in women with endometriosis.
expression analysis	7099	TLR4	26872033	HMGB1 and TLR4 are overexpressed in endometriosis patients and correlate with the extent of stromal and epithelial cell death.
polymorphism	7124	TNF	15212671	TNFA promoter polymorphism is associated with susceptibility to endometriosis.
polymorphism	7124	TNF	15319381	The variability of the -1031T/C polymorphism of the TNF-alpha gene may be associated with susceptibility to endometriosis.
expression analysis	7124	TNF	16006475	IL-6 and TNFalpha are involved in the production of HGF by endometrial stromal cells and may be involved in the growth of endometriosis by an autocrine mechanism
expression analysis	7124	TNF	17207568	CD14+ cells producing TNF-alpha, IL-6, IL-10, MCP-1, and IL-8 were significantly higher in peripheral blood than peritoneal fluid mononuclear cells of women with endometriosis.
expression analysis	7124	TNF	18272527	genotype frequencies at the TNF:g.[-1031T > C] and the TNF:g.[-863C > A] sites may be associated with advanced stage endometriosis in the Korean population
polymorphism	7124	TNF	19394608	we have demonstrated an association between TNFA -C850T polymorphism and endometriosis
expression analysis	7124	TNF	19903048	Patients with severe dysmenorrhoea had increased peritoneal fluid TNF-alpha and glycodelin. TNF-alpha and glycodelin may play role in endometriosis and severity of menstrual pain.
expression analysis	7124	TNF	22563871	TNF-alpha, human - Data suggest that, in post-menarche girls (13-19 years) with endometriosis, peritoneal fluid levels of TNF-alpha A are significantly higher than in control subjects. TNF-alpha is proposed as diagnostic marker of endometriosis.
expression analysis	7124	TNF	23952049	genetic association studies in population of women in Iran: Data suggest that an SNP in TNFalpha (tumor necrosis factor-alpha, -1031T/C) (but not an SNP in VEGFA, vascular endothelial growth factor A, +450G/C) is associated with endometriosis.
expression analysis	7124	TNF	24012198	Suggest crucial role of TNF-alpha in endometriotic perotineal fluid-induced embryotoxicity and suggest that TNF-alpha inhibitors may be potential therapeutic agents for treating endometriosis-induced infertility.
expression analysis	7124	TNF	24308758	TNF-alpha and IL-6 gene polymorphisms were associated with endometriosis in Asians. [review]
expression analysis	7124	TNF	24844917	Report role of TNF-alpha/TNFR1/TNFR2 signaling system in mononuclear cells recovered from peritoneal fluid of women with endometriosis at different stages.
expression analysis	7132	TNFRSF1A	18510047	Higher percentage of peritoneal fluid macrophages expressing TNFR1 and TNFR2 proteins in endometriosis suggests dependence of these cells on TNF-alpha stimulation.
expression analysis	7132	TNFRSF1A	24844917	Report role of TNF-alpha/TNFR1/TNFR2 signaling system in mononuclear cells recovered from peritoneal fluid of women with endometriosis at different stages.
expression analysis	7132	TNFRSF1A	26963895	tumor necrosis factor receptor superfamily member 1A is significantly higher in serum of endometriosis patients than controls
expression analysis	7133	TNFRSF1B	14506926	Deficient expression of TNF-RII mRNA in the endometrium of women at the earliest stages of endometriosis may play a significant role in the pathophysiology of this disease.
expression analysis	7133	TNFRSF1B	18510047	Higher percentage of peritoneal fluid macrophages expressing TNFR1 and TNFR2 proteins in endometriosis suggests dependence of these cells on TNF-alpha stimulation.
expression analysis	7133	TNFRSF1B	24844917	Report role of TNF-alpha/TNFR1/TNFR2 signaling system in mononuclear cells recovered from peritoneal fluid of women with endometriosis at different stages.
expression analysis	7157	TP53	12062821	Perturbations of chromosome 17 in general and the p53 locus in particular occur frequently in severe/late stage endometriosis.
mutational analysis	7157	TP53	12568865	mutation analysis of this gene in a case of familial endometriosis
polymorphism	7157	TP53	15120697	findings suggest that the tumor protein p53 codon 72 polymorphism is unlikely to be associated with endometriosis in Japanese women
polymorphism	7157	TP53	16896365	Association between endometriosis and p53 codon 72 polymorphism exists. P53 codon 72*Pro-related genotype and allele are related with higher susceptibility of endometriosis.
polymorphism	7157	TP53	17412337	p53 codon 72 polymorphism in Italian women have a minor role in determining genetic susceptibility to endometriosis
expression analysis	7157	TP53	19467764	Results suggest that an increased transcription of pro-apoptotic genes (p53 and Bcl-x(S)) in eutopic endometrium is significantly associated with endometriosis, which indicates dysregulation of apoptotic gene transcription associated with disease.
expression analysis	7157	TP53	22199295	p53 and CDKN1A genotypes are associated with endometriosis
meta-analysis	7157	TP53	22258307	The meta-analysis suggests that p53 codon 72 Pro/Pro Arg/Pro genotypes are associated with increased risk of endometriosis in Asians.[meta-analysis]
polymorphism	7157	TP53	22353881	The 16-bp duplication polymorphism in TP53 contributes significantly to endometriosis susceptibility in the Mexican population.
polymorphism	7157	TP53	22653586	Data suggest that genotype Pro/Pro of codon 72 polymorphism in TP53 contributes significantly to endometriosis susceptibility in the Mexican population.
mutational analysis	7157	TP53	23167810	endometriosis is not associated with gene mutations for p53codon72
expression analysis	7157	TP53	23453606	A significant increase of PTPN22 *T allele in endometriosis is observed in women carrying ACP1*C allele, in women carrying p53 codon 72 *Pro allele
polymorphism	7157	TP53	24999736	genetic polymorphism may be associated with susceptibility to endometriosis in East Asians, but not in Europeans and Latin Americans
polymorphism	7157	TP53	25177931	Data show that tumor protein TP53 codon 72 polymorphism may be associated with susceptibility to endometriosis.
polymorphism	7157	TP53	25819169	the TP53 Arg72Pro polymorphism can increase the risk of endometriosis, especially among Asians and Mixed race populations (Meta-Analysis)
polymorphism	7157	TP53	25889195	TP53 Arg72Pro polymorphism (rs1042522) was positively associated with risk of endometriosis, particularly among Asians (Review)
meta-analysis	7157	TP53	26194887	TP53 codon 72 polymorphism was associated with endometriosis risk, especially in Asians and Latin Americans (meta-analysis).
expression analysis	7157	TP53	26216523	The strength of association between p53 codon 72 and endometriosis is positively correlated with the number of the three factors considered.
polymorphism	7157	TP53	26493553	the p53 Arg72Pro polymorphism was closely related to the risk of endometriosis, especially in Asian populations.
expression analysis	7170	TPM3	22158085	investigation of biomarkers for early diagnosis of endometriosis: Data suggest that TPM3, stomatin-like protein 2, and tropomodulin 3 are autoantigens present in blood of women with endometriosis; immunodominant epitopes were identified.
expression analysis	7216	TRO	12297480	infertile women with endometriosis or unexplained infertility had significantly weakened trophinin expression in the endometrium in the mid-luteal phase
expression analysis	7291	TWIST1	26198055	We found that TWIST1, SNAIL and SLUG are overexpressed in endometriosis
expression analysis	7291	TWIST1	27881125	Increased expression of epithelial OCT4, SOX15 and TWIST1 was detected in endometriotic tissue compared to endometriosis patient endometrium. Epithelial expression of OCT4, SOX15, and TWIST1 was increased in the endometrium of endometriosis patients compared to controls.
expression analysis	7295	TXN	20172870	TBP-2 mRNA levels in the endometrium were lower, and the TRX to TBP-2 ratio was higher in patients with endometriosis than in the control group.
polymorphism	7297	TYK2	23000200	TYK2 rs34536443 polymorphism is associated with a decreased susceptibility to endometriosis-related infertility.
expression analysis	7345	UCHL1	20646535	The density of PGP9.5-immunoreactive nerve fibers in peritoneal lesions in endometriosis patients with pain was positively correlated with the severity of pain.
expression analysis	7345	UCHL1	23820422	Data suggest that expression of neuronal markers PGP9.5 (ubiquitin C-terminal hydroxylase-L1, human), NGFp75 (p75 neurotrophin receptor) and VR1 (vanilloid receptor 1) in endometrium of women is independent of presence of endometriosis.
expression analysis	7349	UCN	21289256	Women with endometriosis show an impaired endometrial expression of CRH and Ucn mRNA.
expression analysis	7349	UCN	28925754	In women with chronic pelvic pain, infertility, or both symptoms, the probability of endometriosis (positive predictive value) increased consistently with the increase of plasma Ucn1 levels.
expression analysis	7392	USF2	18165439	Data show that the elevated levels of USF2 in endometriosis account for, in part, the aberrant expression of SF-1 and its target gene StAR and aromatase.
expression analysis	7412	VCAM1	11963839	women with stage III and IV endometriosis had higher serum concentrations of soluble VCAM-1, lower serum concentration of soluble ICAM-1
expression analysis	7412	VCAM1	17678915	Women with endometriosis had increased peritoneal mRNA expression of RANTES and VCAM-1 during menstrual compared with luteal phase.
expression analysis	7412	VCAM1	25473757	VCAM-1 may play a role in the pathogenesis of endometriosis.
expression analysis	7422	VEGFA	12594002	We studied the association of endometriosis with circulating levels of human leukocyte antigens and VEGF in two generations of a single family (mother and three daughters). These markers were expressed distinctly in women with familial endometriosis.
expression analysis	7422	VEGFA	14667896	association of VEGF concentration in follicular fluid with endometriosis-related infertility
expression analysis	7422	VEGFA	15746194	The -460T/+405C haplotype in the VEGF gene, which is associated with lower promoter activity, was significantly less common in women with endometriosis than in controls.
polymorphism	7422	VEGFA	15979997	the VEGF +405 C/G polymorphism may be associated with the risk of advanced stage endometriosis in the Korean population
expression analysis	7422	VEGFA	16322068	the up-regulated VEGF and angiogenesis in tissue from women with endometriosis may reflect failure of neutrophil differentiation
expression analysis	7422	VEGFA	16962110	Endometrial transplants from patients with endometriosis express more VEGF and MMP-2 than endometrium in control women. VEGF and MMP-2 may expedite formation of endometriosis in its early stage.
expression analysis	7422	VEGFA	17602688	among women with confirmed endometriosis, there was a significant increase (P=0.002) in the mean peritoneal VEGF level in those in the late secretory phase compared with those in the proliferative and early secretory phases.
expression analysis	7422	VEGFA	17765237	Vascularization and VEGF and Flk-1 expression are significantly higher in deeply infiltrating endometriosis affecting the rectum.
expression analysis	7422	VEGFA	17963063	The VEGF +936 T allele is associated with an increased risk of stage III-IV endometriosis in a Japanese population.
polymorphism	7422	VEGFA	17977866	Role for the +405G>C VEGF polymorphism in endometriosis development.
expression analysis	7422	VEGFA	18053993	Cyclooxygenase-2 and VEGF were closely correlated with each other, and both of them appear to play a role in the angiogenesis of ovarian endometriosis.
expression analysis	7422	VEGFA	19531502	The -1154A and -2578A alleles of VEGF are associated with a protective effect against the development of endometriosis in North Chinese women.
expression analysis	7422	VEGFA	20041256	VEGF +405 GC genotype and +405G allele may be associated with the risk of developing early and advanced stage endometriosis in the Turkish population
expression analysis	7422	VEGFA	20555002	the CC genotype of VEGF +405 and 460T/405C haplotypes of VEGF may be associated with the risk of endometriosis, but the G allele of VEGF +405 appears to be protective against endometriosis
polymorphism	7422	VEGFA	20685027	the VEGF -2578 A/C single nucleotide polymorphisms may influence susceptibility to endometriosis in the Estonian population.
polymorphism	7422	VEGFA	22128802	The +405G>C polymorphism in VEGF may be associated with higher risk of endometriosis in northern Iran.
expression analysis	7422	VEGFA	22230112	Report expression of VEGF/Flt1 in peritoneal and endometrial environment in patients with endometriosis.
polymorphism	7422	VEGFA	22392487	The present meta-analysis provides strong evidence that VEGF gene +936TC polymorphism increases endometriosis risk and may become a useful marker for the pathogenesis of endometriosis.
expression analysis	7422	VEGFA	22542989	Increased levels of VEGF-A may be associated with a decreased rate of pelvic adhesion formation in the course of endometriosis.
polymorphism	7422	VEGFA	22568177	Results from studies that assayed VEGF polymorphism in endometriosis are reviewed. Data in the literature suggest that VEGF SNPs such as: -460C/T +405G/C and 936C/T seem to be a risk factor for endometriosis. [review]
expression analysis	7422	VEGFA	22781068	The VEGF +405C/G and +936C/T SNP may be associated with the risk of endometriosis.
polymorphism	7422	VEGFA	23613250	the rs3025039 (C>T) polymorphism of the VEGF gene increases the risk of endometriosis, but the rs699947 (A>C) and rs1570360 (G>A) polymorphisms might be protective factors for endometriosis.
expression analysis	7422	VEGFA	23952049	genetic association studies in population of women in Iran: Data suggest that an SNP in TNFalpha (tumor necrosis factor-alpha, -1031T/C) (but not an SNP in VEGFA, vascular endothelial growth factor A, +450G/C) is associated with endometriosis.
expression analysis	7422	VEGFA	24228111	GnRH-II significantly inhibited the cell proliferation, induced cell apoptosis and decreased the VEGF secreting of endometrial stromal cells from patients with endometriosis.
expression analysis	7422	VEGFA	25255852	The present results indicate a positive association between VEGF -1154G > A and the risk of developing endometriosis, whereas the CCGG haplotype may be protective against the development of disease.
expression analysis	7422	VEGFA	25534318	p27kip1 overexpression regulates VEGF expression, cell proliferation and apoptosis in cell culture from eutopic endometrium of women with endometriosis.
meta-analysis	7422	VEGFA	25573961	This meta-analysis supports that the VEGF +405G>C genetic polymorphism is not significantly associated with the risk of endometriosis.
expression analysis	7422	VEGFA	25984730	findings suggest that the VEGF +936 C/T polymorphism may be a risk factor for endometriosis development and the VEGF +936 T allele is associated with an increased risk of stages III-IV endometriosis in the Tunisian population
expression analysis	7422	VEGFA	26577912	Peritoneal VEGF-A expression is regulated by TGF-beta1 through an ID1 pathway in women with endometriosis
expression analysis	7422	VEGFA	26773192	Plasma levels of VEGF were elevated in endometriosis patients compared with controls.
expression analysis	7422	VEGFA	27836223	Our results indicate that VEGF SNPs -2578C>A and -1154G>A increase endometriosis risk, whereas VEGF +405G>C and VEGFR2 1192C>T are protective against disease development, with VEGFR2 1192C>T also reducing cyclical urinary symptoms. The combined analysis of VEGF-VEGFR2 genotypes suggests a gene-gene interaction in endometriosis susceptibility.
expression analysis	7422	VEGFA	28990049	VEGFA was overexpressed in endometriosis tissues, and we identified miR-34a-5p is able to target the VEGF gene, preventing the latter to function as an inhibitor of angiogenesis. These results imply that miR-34a-5p might regulate VEGFA in ESCs and might contribute to the pathogenesis of endometriosis.
expression analysis	7422	VEGFA	30074218	the expression of MMIF, HIF-1alpha, and VEGF in the serum and endometrial tissues may be used to assess the stage of endometriosis and the severity of dysmenorrhea.
expression analysis	7424	VEGFC	23334337	Vascular endothelial growth factor C is increased in endometrium and promotes endothelial functions, vascular permeability and angiogenesis and growth of endometriosis.
expression analysis	7424	VEGFC	23585340	Dysregulated expression of VEGF-C likely contributes to altered angiogenesis, lymphangiogenesis, neurogenesis and immune function in endometriosis.
expression analysis	7430	EZR	17525629	Ezrin is de-expressed in endometriosis and endometrioid carcinoma compared with normal uterine epithelium.
expression analysis	7430	EZR	18552365	Ezrin is a potential marker for endometrial cell invasion and is associated with the pathogenesis of endometriosis.
expression analysis	7430	EZR	22544491	results indicate the over-expression of ezrin in endometriosis may play a significant role in the migration of endometrial cells of endometriosis, and the RhoC/Rock pathway may provide a promising treatment target
expression analysis	7442	TRPV1	21160085	The present study shows that TRPV1 expression in peritoneal endometriosis foci is related to chronic pelvic pain in women.
expression analysis	7442	TRPV1	22556011	The results suggested that the increased TRPV1-positive nerve fibers may integrate various stimuli on peripheral terminals or primary sensory neurons and generate hyperalgesia in endometriosis.
expression analysis	7442	TRPV1	22883519	The expression of TRPV1 was correlated with the degree of pain in patients with endometriosis.
expression analysis	7442	TRPV1	23820422	Data suggest that expression of neuronal markers VR1 (vanilloid receptor 1), PGP9.5 (ubiquitin C-terminal hydroxylase-L1, human), and NGFp75 (p75 neurotrophin receptor) in endometrium of women is independent of presence of endometriosis.
expression analysis	7472	WNT2	26116230	Wnt2/beta-catenin signaling was involved in stromal-epithelial cells interaction in endometriosis.
expression analysis	7476	WNT7A	17588571	WNT7A plays a role in the pathophysiology of endometriosis.
expression analysis	7490	WT1	18722603	Innervation of deep endometriosis has been linked to its severe pain symptoms. Wilms' tumor gene 1 is overexpressed in part of these nerves.
polymorphism	7515	XRCC1	18442016	XRCC1 Arg399Gln polymorphism is associated with higher susceptibility to endometriosis and might be a useful biomarker for endometriosis
expression analysis	7515	XRCC1	22084859	XRCC1 399 Arg-related genotype and allele are correlated with higher susceptibility to endometriosis, which suggested its association with endometriosis pathogenesis. XRCC1 107 and 194 are not associated with endometriosis susceptibility.
meta-analysis	7515	XRCC1	28926725	Our meta-analysis suggested that Arg399Gln in XRCC1 was associated with endometriosis risk. And especially in Asians, the A allele might be a preventive factor for this disease.
polymorphism	7518	XRCC4	18246529	XRCC4 codon 247*A and XRCC4 promoter -1394*T related genotypes and alleles, but not XRCC4 intron 3 I/D polymorphism, might be associated with endometriosis susceptibilities and pathogenesis.
polymorphism	7518	XRCC4	26088159	The XRCC4 -1394T/G polymorphism is associated with susceptibility to endometriosis in an Iranian population.
expression analysis	7850	IL1R2	11804955	reduced levels of mRNA in the endometrium of women suffering from endometriosis reveals a profound defect in gene expression with reduced capability of endometrial tissue to down-regulate IL-1 activity
expression analysis	7850	IL1R2	15705625	a reduced release of sIL-1RII by the endometrial tissue of women with endometriosis and revealed a proteolytic post-translational mechanism which may be involved in the down-regulation of IL-1RII levels
expression analysis	7850	IL1R2	17324958	decreased IL1R2 expression is predominant in the eutopic and ectopic endometrium of women with endometriosis when compared with normal women.
expression analysis	7850	IL1R2	17482186	Suggest that IL-1RII can neutralize IL-1 beta and counteract its effect on endometrial stromal cells, and may provide a new clinical strategy for the treatment of endometriosis.
expression analysis	7850	IL1R2	17517439	Abnormal interleukin 1 receptor types I and II gene expression in eutopic and ectopic endometrial tissues of women with endometriosis.
expression analysis	7850	IL1R2	17919610	Levels of interleukin-1beta and Il1R2in the peritoneal fluid of normal women and patients with endometriosis suffering from pelvic pain and infertility.
expression analysis	7850	IL1R2	21083841	As already reported in endometriotic cells, endometrioid ovarian cancer cells exhibit a decrease in the expression of IL-1RII. These findings highlight a common signature between endometrioid ovarian cancer and implants of endometriosis.
expression analysis	7852	CXCR4	25957946	The estradiol-CXCL12/CXCR4 signaling pathway may be useful in determining treatments for endometrial disorders, and may be antagonized to block stem cell migration to endometriosis.
expression analysis	7980	TFPI2	23805888	TFPI2 is a novel serum marker for ovarian clear cell adenocarcinoma and neoplastic transformation from endometriosis.
expression analysis	8091	HMGA2	20461755	HMGA2 rearrangements in mass-forming endometriosis are reported.
expression analysis	8091	HMGA2	22221703	These findings suggest that HMGA rearrangements likely contribute to the pathogenesis of endometriosis.
expression analysis	8289	ARID1A	22653341	The loss of expression of ARID1A and the presence of inactivating mutations of the ARID1A gene further link this tumor to endometrioid and clear cell tumors, as does the frequent association with endometriosis.
mutational analysis	8289	ARID1A	23232571	Inactivating mutations of the ARID1A tumor suppressor gene are the most common in endometriosis related ovarian neoplasms.
mutational analysis	8289	ARID1A	24036443	The occurrence of ARID1A mutations and alterations in the PI3K/AKT pathway in endometriosis and endometriosis-associated ovarian carcinomas, as well as the possible functional and clinical implications are discussed in this review.
expression analysis	8289	ARID1A	25913291	The action of ARID1A in carcinogenesis differs between adenofibroma-related clear cell carcinoma and endometriosis-related clear cell carcinoma.
expression analysis	8289	ARID1A	26832958	Partial loss (i.e. in one tissue section some cells stained positive for BAF250a while other cells, usually an adjacent group, were negative) of BAF250a protein was identified in 36% (9/25) of rectovaginal DIE samples, 40% (2/5) of endometriosis lesions involving the PSLN, 30% (6/20) of endometriomas, and also in 25% (5/20) of endometrium from controls.
expression analysis	8289	ARID1A	26945423	The loss of ARID1A was correlated with late-stage and endometriosis-associated ovarian clear cell carcinoma. ARID1A expression may predict the risk of recurrence.
expression analysis	8289	ARID1A	27051059	BAF250a loss in AE is consistently associated with the development of BAF250a-negative endometriosis-associated cancers and appears to be an early event in most of these cases.
mutational analysis	8289	ARID1A	28483516	ARID1A mutation can be an early stage event in the oncogenic transformation of endometriosis cells giving rise to ovarian clear cell carcinoma.
expression analysis	8462	KLF11	23555910	Data identify a novel pathogenic role for KLF11 in preventing de novo disease-associated fibrosis in endometriosis.
expression analysis	8549	LGR5	28923287	Report the presence of aberrantly located LGR5(+) cells coexpressing epithelial markers in the stromal compartment of women with endometriosis. These cells have a statistically significantly different expression profile in deep-infiltrating endometriosis in comparison with other types of endometriosis, independent of the menstrual cycle phase.
expression analysis	8644	AKR1C3	25446850	Higher expression of PLA2G2A, PTGS2, AKR1B1, AKR1C3 and ABCC4 was seen in 22-B endometriosis cells.
expression analysis	8650	NUMB	29398419	High NUMB expression is associated with endometriosis.
polymorphism	8660	IRS2	19878940	The insulin receptor substrate G1057D polymorphism may be associated with an increased risk for endometriosis.
expression analysis	8828	NRP2	23585340	Dysregulated expression of NRP-2 likely contributes to altered angiogenesis, lymphangiogenesis, neurogenesis and immune function in endometriosis.
expression analysis	8829	NRP1	23585340	Dysregulated expression of NRP-1 likely contributes to altered angiogenesis, lymphangiogenesis, neurogenesis and immune function in endometriosis.
expression analysis	8842	PROM1	23545719	the expression and localisation of the proteins, osteopontin (OPN) and prominin-1 (CD133), as well as the plasma OPN levels in the endometrium of patients with endometriosis, were investigated.
expression analysis	9077	DIRAS3	21602127	ARHI expression is present in the endometrium and up-regulated in ectopic endometrium, whereas in the ectopic endometrium of patients with malignant endometriosis its expression is often negative.
expression analysis	9112	MTA1	30170442	MTA1 is closely associated with the occurrence and development of endometriosis. Thus, MTA1 level may be used as a new indicator to predict the progression of endometriosis
expression analysis	9166	EBAG9	16907986	The expression of RCAS1 by endometrial cells may favor the persistence of these cells in ectopic localization both in scar following cesarean section and in ovarian endometriosis.
expression analysis	9173	IL1RL1	25069762	In patients with endometriosis, ST2 was positively associated with VAS score.
expression analysis	9173	IL1RL1	25977120	IL-33 and soluble ST2 values in peritoneal fluid were found to correlate with endometriosis severity. Elevated and correlated peritoneal fluid IL-33 and soluble ST2 levels from endometriosis patients suggested a potential role as biomarkers of disease.
expression analysis	9201	DCLK1	27881125	Increased expression of stromal DCLK1 was detected in endometriotic tissue compared to endometriosis patient endometrium. Stromal expression of DCLK1 was increased in endometrium of endometriosis patients compared to controls.
expression analysis	9212	AURKB	21840910	analysis of Aurora A and B kinases, Ki-67 and the estrogen and progesterone receptors from an endometriosis tissue microarray model
expression analysis	9308	CD83	19321495	CD1a and CD83 may be involved in pain generation and the pathogenesis of endometriosis
expression analysis	9353	SLIT2	22875847	Slit2 overexpression increases the lesion size in endometriosis and increases microvessel density.
expression analysis	9370	ADIPOQ	16055459	adiponectin is implicated in the pathophysiology of endometriosis
expression analysis	9370	ADIPOQ	16135012	Reduced concentration of adiponectin in peritoneal fluid of women with endometriosis implies a role for adiponectin in the pathogenesis of endometriosis.
expression analysis	9437	NCR1	24807109	Women, w/ or w/o endometriosis, having larger populations of cytotoxic CD16(+) uterine NK cells and/or higher populations of NKp46(+)CD56(+) cells may be at greater risk of infertility resulting from inflammatory environment during implantation or later
expression analysis	9475	ROCK2	21303778	Ras/Raf/MAPK and RhoA/ROCKII signalling pathways are abnormally activated in eutopic endometrial stromal cells of patients with endometriosis
expression analysis	9475	ROCK2	25940707	17beta-estradiol induces proliferation of uterine smooth muscle cells in endometriosis through hyperactivation of the estrogen receptor-RhoA/ROCK signaling pathway.
expression analysis	9518	GDF15	20937742	NAG-1 may be important in maintaining homeostasis in the normal endometrium and alterations in NAG-1 expression may be associated with the establishment of endometriosis.
expression analysis	9536	PTGES	17295901	Results suggest that expression of microsomal PGES in addition to COX-2 plays a role in increasing PGE(2) production in endometriosis.
expression analysis	9536	PTGES	23252918	Relationship between TLR4 and mPGES-1 mRNA in endometriotic lesions indicate that innate immunity may play an important role in the pathogenesis of endometriosis.
expression analysis	9670	IPO13	22648251	These results demonstrate an increased expression of IPO13 in endometriosis and endometrial carcinoma.
expression analysis	9687	GREB1	22884659	GREB1 alpha mRNA/protein expression levels were increased in ectopic tissue in peritoneal endometriosis.
expression analysis	9687	GREB1	25788566	the GREB1 region on chromosome 2p25.1 and the GREB1 gene may play a role in endometriosis risk
expression analysis	10016	PDCD6	23137875	the current study indicates that PDCD6 gene may be a new susceptibility gene to endometriosis.
expression analysis	10257	ABCC4	23472950	MRP4 is expressed in human endometrium, elevated in peritoneal endometriosis, and modulated by lipoxin A(4) in endometriotic epithelial cells.
expression analysis	10288	LILRB2	29234882	Results show that LILRB2 rs383369:AG predisposed to the endometriosis and its progression.
expression analysis	10298	PAK4	23293332	increased expression of Pak4 might lead to the establishment and progression of endometriosis by enhanced cellular viability and invasiveness in endometrial cells.
expression analysis	10400	PEMT	21429654	genetic association studies on endometriosis in a population of women in Poland: Data suggest interaction between an SNP in PEMT (rs4244593) and an SNP in MTHFR (Ala222Val; rs1801133) in infertile women with some indication of endometriosis.
expression analysis	10401	PIAS3	27226311	Levels of PIAS3 are significantly lower, in contrast with phosphorylation of STAT3, in women with endometriosis compared to women without endometriosis.
expression analysis	10413	YAP1	26977530	Activated Hippo/Yes-Associated Protein is associated with Endometriosis.
expression analysis	10424	PGRMC2	23793472	In secretory phase endometrium from women with advanced stage endometriosis, PGRMC-2 expression is downregulated.
expression analysis	10468	FST	21496809	Disturbed expression of endometrial activin A, cripto , and follistatin suggests a dysfunction of the activin pathway in endometriosis/endometrioma.
expression analysis	10468	FST	22416010	The present study demonstrated that serum follistatin is not significantly altered in peritoneal or deep infiltrating endometriosis and has limited diagnostic accuracy in the diagnosis of ovarian endometrioma.
expression analysis	10512	SEMA3C	27558236	in situ hybridization analysis revealed that Sema 3C and Sema 3F are expressed at the RNA level in the endometriosis affected peritoneum
expression analysis	10551	AGR2	22147918	investigation of expression of AGR2, S100P, and S100A4 at cellular level within endometrium of normal fertile women across menstrual cycle and comparison with expression in eutopic and peritoneal ectopic endometrial tissue in endometriosis
expression analysis	10563	CXCL13	25031316	In the presence of endometriosis, proliferative-phase endometrial expression of CXCL13 markedly increased.
expression analysis	10628	TXNIP	20172870	TBP-2 mRNA levels in the endometrium were lower, and the TRX to TBP-2 ratio was higher in patients with endometriosis than in the control group.
expression analysis	10631	POSTN	22471299	Data suggest that expression of POSTN in eutopic and ectopic endometrium of women with endometriosis increases compared with normal endometrium; there is cyclic variation in eutopic stromal periostin expression throughout the menstrual cycle.
expression analysis	10663	CXCR6	21773780	CXCL16 and CXCR6 might be involved in the pathophysiology of endometriosis through regulation of the inflammatory response.
expression analysis	10664	CTCF	29845264	These results, together with a prior exomesequencing based study, suggest that CTCF mutations may be involved in the development of ovarian endometriosis.
expression analysis	10673	TNFSF13B	17640886	suggest a model for the pathology of endometriosis where BLyS-responsive plasma cells interact with retrograde menstrual tissues to give rise to endometriosis lesions
expression analysis	10673	TNFSF13B	20004378	Patients with deep infiltrating endometriosis had less often a BLyS -817C/T genotype as compared with the reference group.
expression analysis	10803	CCR9	20081876	over-expressed TECK interacts with CCR9 on the endometrial stromal cells in the endometriotic milieu, which may contribute to the onset and progression of endometriosis.
expression analysis	10855	HPSE	14989983	Heparanase gene expression may play some roles in the pathogenesis of endometriosis, and it may participate the regulation of menstrual cycle and may be an important target of the trentment for endometriosis.
expression analysis	10855	HPSE	17141400	The higher expression of Hpa and Ang-2 in ectopic and eutopic endometrium may play an important role in the pathogenesis and development of endometriosis.
expression analysis	10857	PGRMC1	23793472	PGRMC-1 expression is downregulated in the endometria from women with advanced stage endometriosis.
expression analysis	10859	LILRB1	29234882	Results show that LILRB1 rs41308748:AA predisposed to the endometriosis and its progression.
expression analysis	10891	PPARGC1A	24654751	PGC-1alpha stimulated by TNF-alpha regulates aromatase expression and activity to promote local estrogen biosynthesis in ovarian endometriosis, suggesting that PGC-1alpha is a promising candidate for novel targeted therapies in endometriosis treatment.
polymorphism	10963	STIP1	29673672	The G/G allele of stress induced phosphoprotein 1(STIP1) single nucleotide polymorphism rs4980524 is associated with the increased expression of STIP1 in endometriosis
expression analysis	10987	COPS5	25666480	Jab1 expression was increased in endometriosis.
expression analysis	11009	IL24	27624484	Low IL24 expression is associated with endometriosis.
expression analysis	11156	PTP4A3	20045518	Expression of PRL-3 is related to the clinical stages and recurrence of endometriosis, which provides use with a novel marker and promising target in the treatment of human endometriosis.
expression analysis	11214	AKAP13	16412732	The spatiotemporal expression of Brx was altered in eutopic endometrium of women with endometriosis.
expression analysis	11315	PARK7	21445310	Abnormally high levels of DJ-1 expression may be involved in endometriosis, possibly by stimulating endometrial cell survival, proliferation, migration, and invasion
expression analysis	11315	PARK7	25721338	DJ-1 protein may be involved in endometrial cells proliferation, migration and angiogenesis by modulating the PI3K/Akt/p-mTOR signaling pathway, which provides an underlying theoretical target for endometriosis and adenomyosis
expression analysis	11331	PHB2	26653759	REA modulates cross talk among multiple cell types in the uterine tissue and host background, serving as a brake on the estradiol-ER axis and restraining multiple aspects that contribute to the pathologic progression of endometriosis.
expression analysis	22914	KLRK1	25775242	This study suggests that NKG2D ligands shedding of MICA, MICB and ULBP-2 is a novel pathway in endometriosis complex pathogenesis that impairs Natural Killer Cells cell function.
expression analysis	23028	KDM1A	24388204	The expression of the LSD1 gene and protein in endometriosis is elevated, suggesting that LSD1 may be a candidate therapeutic target for endometriosis.
expression analysis	23411	SIRT1	24320086	Data suggest that interleukin 8 release from endometrial stromal cells is modulated through SIRT1-mediated signaling in tissue from women with ovarian endometriosis; SIRT1 is expressed in cell nuclei of normal/endometriosic endometrial stromal cells.
expression analysis	25945	NECTIN3	22926846	Data suggest that expression of nectin-3 is up-regulated in eutopic endometrium of patients with endometriosis as compared with control subjects and up-regulated in all endometriotic lesions investigated compared with eutopic endometrium.
expression analysis	26038	CHD5	22910690	In this Caucasian population, endometriosis seems to be associated with the tumor-suppressor gene CHD5. Our findings support recent data, suggesting that the 1p36 region plays an important role in endometrios.
expression analysis	26191	PTPN22	17624340	Female carriers of the PTPN22( *)T variant are significantly more susceptible to endometriosis than controls.
polymorphism	26191	PTPN22	20070289	The data suggest that in Brazilian women polymorphism PTPN22 (C1858T) may be an important genetic predisposing factor for endometriosis, especially, in advanced disease.
expression analysis	26191	PTPN22	23453606	A significant increase of PTPN22 *T allele in endometriosis is observed in women carrying ACP1*C allele, in women carrying p53 codon 72 *Pro allele
expression analysis	26191	PTPN22	26216523	ADA6, PTPN22 and ACP1 are involved in immune reactions: since endometriosis has an autoimmune component.
expression analysis	26191	PTPN22	28444099	The associations observed between PTPN22 (C1858T) and the risk of endometriosis suggest this polymorphism might be a useful susceptibility marker for this disease.
expression analysis	26585	GREM1	18314105	Elevated levels of gremlin-1 in eutopic endometrium and peripheral serum in patients with endometriosis.
expression analysis	27178	IL37	26342048	These findings suggest that increased expression of IL-37 was present in eutopic and ectopic endometrium of women with ovarian endometriosis, which might be involved in the inflammatory process of endometriomas.
expression analysis	27178	IL37	28322860	this study found that IL-37 levels in peritoneal fluid and in serum were significantly higher in patients with endometriosis compared to women without endometriosis
expression analysis	27242	TNFRSF21	24028773	The present findings suggested that DR6 is involved in the pathogenesis of endometriosis by creating the proliferative and anti-apoptotic characteristics of endometriosis.
SNPs	28952	CCDC22	28470452	SNPs within the CCDC22 gene are associated with increased susceptibility to endometriosis in Brazilian women.
expression analysis	29766	TMOD3	22158085	investigation of biomarkers for early diagnosis of endometriosis: Data suggest that TMOD3, tropomyosin 3, and stomatin-like protein 2 are autoantigens present in blood of women with endometriosis; immunodominant epitopes were identified.
polymorphism	29947	DNMT3L	22401780	Genetic polymorphisms of DNMT3L involved in hypermethylation of chromosomal ends are associated with greater risk of developing ovarian endometriosis.
expression analysis	30968	STOML2	22158085	investigation of biomarkers for early diagnosis of endometriosis: Data suggest that SLP2, tropomyosin 3, and tropomodulin 3 are autoantigens present in blood of women with endometriosis; immunodominant epitopes were identified.
expression analysis	50616	IL22	24133578	the higher level of IL-22 and its receptors in eutopic endometrium may stimulate expression of CCL2, IL-8/CXCR1, and promote the growth of stromal cells through activating signal pathways which may be involved in the development of endometriosis.
expression analysis	50943	FOXP3	20150173	Immunohistochemical analysis of Foxp3+ cells in 127 eutopic endometrial samples and 59 ectopic peritoneal lesions revealed that these immune cell populations are highly disturbed in women suffering from endometriosis.
polymorphism	50943	FOXP3	21481380	Report an association between FOXP3 polymorphisms and endometriosis and/or infertility in a Brazilian population.
polymorphism	50943	FOXP3	22341374	Findings support a possible gene-gene interaction for FOXP3/FCRL3 polymorphisms, leading to a cumulative effect on endometriosis development.
expression analysis	50943	FOXP3	22541024	FoxP3+ Tregs in the peri-implantation endometrium might participate in the pathogenesis of advanced endometriosis.
polymorphism	50943	FOXP3	23450493	Our study has failed to found any association between FOXP3 gene polymorphisms rs2280883, rs3761548 and rs3761549 with endometriosis in Chinese Han patients.
expression analysis	50943	FOXP3	25064223	eutopic endometrium Foxp3 expression of women with endometriosis was associated with chronic pelvic pain and cyclic urinary pain.
expression analysis	51478	HSD17B7	17454161	17beta-hydroxysteroid dehydrogenase type 7(17beta-HSD type 7)was significantly upregulated in ovarian tissue of patients with ovarian endometriosis.
expression analysis	51571	FAM49B	25284053	Three proteins-matrix metalloproteinase-9, neutrophil elastase, and FAM49B-were significantly lower in abundance in samples from women with endometriosis.
expression analysis	51738	GHRL	18976754	endometriosis is associated with increased peritoneal ghrelin levels
expression analysis	51738	GHRL	24845415	possible role in endometriosis
expression analysis	54361	WNT4	23142796	We confirm WNT4, CDKN2BAS and FN1 as the first identified common loci for endometriosis.
SNPs	54361	WNT4	25154675	Our results suggest that the rs10965235 SNP in the CDKN2B-AS gene and the rs16826658 SNP near the WNT4 gene were significantly associated with endometriosis in this Korean population.
expression analysis	54361	WNT4	25682310	The results demonstrated that WNT4 rs2235529 is associated with endometriosis in Chinese Han women, which may result in aberrant expression of WNT4, leading to the pathogenesis of endometriosis.
polymorphism	54361	WNT4	26139156	Polymorphisms on WNT4 gene might be involved in the pathogenesis of endometriosis in the infertile women.
mutational analysis	54361	WNT4	28877031	WNT4 encodes wingless-type MMTV integration site family member 4. WNT4 mutations have been found in women with mullerian duct abnormalities, primary amenorrhea, and hyperandrogenism and common variants in WNT4, which are in high linkage disequilibrium with our index SNPs, are associated with endometriosis, ovarian cancer,and bone mineral density of WNT4, and the T allele generates a strong ESR1-b…
expression analysis	54361	WNT4	28901453	We found a genetic association between rs11031006 (FSHB) SNP and endometriosis. WNT4 and VEZT genes constitute the most consistently associated genes with endometriosis. In the present study, an association of rs7521902 (WNT4) and rs10859871 (VEZT) was confirmed in women with endometriosis at the genotypic but not the allelic level.
expression analysis	54790	TET2	26917261	TET1, TET2, and TET3 genes are downregulated in endometriosis.
polymorphism	54796	BNC2	21642636	results suggest that the analysed polymorphisms in the BNC2 gene are unlikely to contribute to the previously reported risk of ovarian cancer in women with endometriosis
meta-analysis	55591	VEZT	25678572	vezatin and nearby SNP rs10859871 may have a role in endometriosis [meta-analysis]
expression analysis	55591	VEZT	28901453	We found a genetic association between rs11031006 (FSHB) SNP and endometriosis. WNT4 and VEZT genes constitute the most consistently associated genes with endometriosis. In the present study, an association of rs7521902 (WNT4) and rs10859871 (VEZT) was confirmed in women with endometriosis at the genotypic but not the allelic level.
mutational analysis	55809	TRERF1	29393434	the present study was the first to identify 2 novel, potentially 'diseasecausing' TRERF1 somatic mutations in the endometriotic lesions in 2 out of 92 patients with ovarian endometriosis; therefore, TRERF1 mutations may be involved in the pathogenesis of ovarian endometriosis.
expression analysis	56729	RETN	28681517	resistin is differentially expressed in endometrial tissues from women with endometriosis and imply a role for resistin in endometriosis-associated pelvic inflammation
expression analysis	56729	RETN	29442466	serum and follicular fluid resistin levels were significantly higher in the endometriosis group
expression analysis	57007	ACKR3	29587613	Study shows that overexpression of CXCR7 in different cellular populations of endometriosis microenvironment may play a role in the pathogenesis and represent a novel target for treatment.
polymorphism	57491	AHRR	16084889	AhRR codon 185 polymorphism is associated with susceptibility to and severity of endometriosis in Japanese women.
polymorphism	57491	AHRR	17513317	the AhRR codon 185 and GSTT1 polymorphisms are associated with the risk of advanced stage endometriosis
expression analysis	57491	AHRR	19501819	AHHR genotyping may help to identify a subpopulation of women who are susceptible to the earlier onset of endometriosis.
SNPs	57491	AHRR	22017422	In the single SNP analysis, GSTM1 null type and AhRR variant type were associated with a significantly increased risk of endometriosis.
expression analysis	57817	HAMP	26137768	Iron overload and increased serum levels of hepcidin plays an important role in the pathogenesis of endometriosis.
expression analysis	58191	CXCL16	21773780	CXCL16 and CXCR6 might be involved in the pathophysiology of endometriosis through regulation of the inflammatory response.
expression analysis	59277	NTN4	24972566	Increased expression of miR-20a may play an important role in the pathogenesis of ovarian endometriosis by suppressing NTN4 expression.
expression analysis	59350	RXFP1	19416175	Data tested the hypothesis that relaxin plays a role in endometriosis by comparing the expression of relaxin mRNA and its LGR7 (RXFP1) receptor mRNA in normal human endometrium to those in samples from patients with endometriosis.
expression analysis	59350	RXFP1	20655530	Endometrial expression of relaxin and relaxin receptor in endometriosis.
expression analysis	64806	IL25	26852387	Women with endometriosis showed significantly higher levels of IL-25 in their PF (p=0.019) compared to controls. IL-25 levels did not correlate with the stage of endometriosis.
expression analysis	79923	NANOG	24884521	Data suggest expression of NANOG and SOX2 (sex determining region Y-box 2) is up-regulated in endometriotic ovary tissue of women with ovarian endometriosis as compared to endometrial tissue from these women or infertile women without endometriosis.
expression analysis	80312	TET1	26917261	TET1, TET2, and TET3 genes are downregulated in endometriosis.
expression analysis	80328	ULBP2	25775242	This study suggests that NKG2D ligands shedding of MICA, MICB and ULBP-2 is a novel pathway in endometriosis complex pathogenesis that impairs Natural Killer Cells cell function.
expression analysis	80895	ILKAP	25872452	The expression of ILKAP was considerably lower in eutopic and ectopic endometrial samples from women with endometriosis than in control endometrium. Expression varied depending on the phase of the menstrual cycle.
expression analysis	81607	NECTIN4	22926846	Data suggest that expression of nectin-4 is up-regulated in eutopic endometrium of patients with endometriosis compared with control subjects.
expression analysis	81607	NECTIN4	27328518	Nectin-4 expression, when compared with control group, was higher in endometriotic lesions of patients having ovarian endometriosis and peritoneal endometriosis. This difference was significant in the endometrium of patients having endometriosis.
expression analysis	83716	CRISPLD2	24955763	CRISPLD2 is a target of progesterone receptor and its expression is decreased in women with endometriosis.
expression analysis	84171	LOXL4	21733505	SNPs in the lysyl oxidase-like protein 4 and complement component 3 genes are associated with increased risk for endometriosis and endometriosis-associated infertility in a Puerto Rican population.
expression analysis	84432	PROK1	19285664	Altered expression of PROK1 could be one of the several biochemical abnormalities characterizing eutopic endometrium in endometriosis.
expression analysis	84557	MAP1LC3A	28348069	High LC3 expression is associated with endometriosis.
expression analysis	84634	KISS1R	22210725	Data suggest that the KISS1/KISS1R system may play a role in the pathophysiology of endometriosis only for a particular group of patients.
expression analysis	85480	TSLP	22888172	TSLP is up-regulated by interleukin (IL)-1b and may be involved in the development of endometriosis.
expression analysis	85480	TSLP	24966899	In endometriosis, TSLP is involved in estrogen mediated regulation of the secretion of MCP-1 and IL-8, and the growth of endometrial stromal cells through JNK and NF-kappaB signal pathways.
expression analysis	85480	TSLP	27976427	this review focuses on recent advances on the effects of TSLP on obstetrical and gynecological diseases, including pregnancy failure, endometriosis, and cervical cancer
expression analysis	90226	UCN2	21454316	These data suggest a possible involvement of urocortin 2 and Ucn 3 in the mechanisms of endometriosis.
expression analysis	90865	IL33	22587998	Serum and peritoneal interleukin-33 levels are elevated in deeply infiltrating endometriosis
expression analysis	90865	IL33	25031694	through the activation of IL-33, the increased expression of IDO1 in ectopic endometrial stromal cells contributed to the truncated phagocytic ability of macrophages in endometriosis.
expression analysis	90865	IL33	25977120	IL-33 and soluble ST2 values in peritoneal fluid were found to correlate with endometriosis severity. Elevated and correlated peritoneal fluid IL-33 and soluble ST2 levels from endometriosis patients suggested a potential role as biomarkers of disease.
expression analysis	90993	CREB3L1	26917262	The results suggest that CREB3L1 is required for decidualization in mice and humans and may be linked to the pathogenesis of endometriosis in a progesterone-dependent manner.
expression analysis	94025	MUC16	17706208	A four-marker panel of CA-125, macrophage chemotactic protein-1, leptin, and macrophage migration inhibitory factor could diagnose the presence of endometriosis with 93% accuracy.
expression analysis	94025	MUC16	18555226	Neutrophil-to-lymphocyte ratio may be used as an adjunct to CA-125 for the diagnosis of endometriosis.
expression analysis	94025	MUC16	24939955	MUC1, MUC4, and MUC16 expression does not vary significantly in normal endometrium during the menstrual cycle or in endometriosis relative to the epithelial marker, cytokeratin-18 (KRT18).
expression analysis	94025	MUC16	25118488	In patients with ovarian endometriosis, serum CA125 was significantly higher than in controls, and decreased after surgical treatment.
expression analysis	94025	MUC16	25834501	The significant difference was observed in patients with endometriosis/endometriomas in which HE4 was not elevated patients and CA125 was elevated in 53% (P<0.001).
expression analysis	94025	MUC16	25967705	High expression of CA125 was found in patients with endometriosis that was curative with laparoscopy.
expression analysis	94025	MUC16	26246541	the diagnostic value of serum cancer antigen (CA)125, CA19-9 and CA15-3 concentrations in endometriosis, was evaluated.
expression analysis	94025	MUC16	27987404	highly predictive of endometriosis in women with symptoms of pain and/or subfertility
expression analysis	94025	MUC16	28660213	The ratio between menstrual and midcycle phases had the worst performance. CA-125 may be useful for the diagnosis of deep endometriosis, especially when both are collected during menstruation and in midcycle.
expression analysis	94025	MUC16	29944231	Serum CA-125 was significantly different between infertile women with and without pelvic endometriosis.
expression analysis	112744	IL17F	21601196	These findings suggest that IL-17F may stimulate the development of endometriosis by up-regulation of IL-8 and COX2.
expression analysis	114131	UCN3	21454316	These data suggest a possible involvement of urocortin 2 and Ucn 3 in the mechanisms of endometriosis.
polymorphism	115352	FCRL3	21529967	the FCRL3 C-169T polymorphism may play an important role in the pathogenesis of endometriosis and/or infertility.
polymorphism	115352	FCRL3	21663782	genetic polymorphism is associated with endometriosis in Brazilian population
polymorphism	115352	FCRL3	22341374	Findings support a possible gene-gene interaction for FOXP3/FCRL3 polymorphisms, leading to a cumulative effect on endometriosis development.
polymorphism	115352	FCRL3	23553198	FCRL3 -169T>C polymorphism alters the expression of FCRL3 and can be a risk factor of endometriosis-related infertility.
polymorphism	115352	FCRL3	26334889	FCRL3 genetic polymorphisms were associated with an increased risk of endometriosis-related infertility, regardless of symptoms.
polymorphism	140453	MUC17	26285705	MUC17 polymorphisms are involved in endometriosis development and the associated infertility in the Taiwanese population.
expression analysis	140828	LINC00261	28707780	LINC00261 inhibits cell growth and migration in endometriosis.
expression analysis	158219	TTC39B	27453397	association of rs519664[T] in TTC39B on 9p22 with endometriosis, is reported.
expression analysis	192343	NEWENTRY	26246541	the diagnostic value of serum cancer antigen (CA)125, CA19-9 and CA15-3 concentrations in endometriosis, was evaluated.[CA 19-9]
expression analysis	192343	NEWENTRY	27320036	Aromatase inhibitor treatment significantly increased expression of let-7f in Ishikawa cells and endometrial stroma cells from patients with endometriosis.
expression analysis	200424	TET3	26917261	TET1, TET2, and TET3 genes are downregulated in endometriosis.
expression analysis	406884	MIRLET7B	25772772	The combination of serum let-7b, 7d, and 7f levels during the proliferative phase may serve as a diagnostic marker for endometriosis.
expression analysis	406884	MIRLET7B	29040578	Low Let-7b expression is associated with inflammation in Endometriosis.
expression analysis	406886	MIRLET7D	25772772	The combination of serum let-7b, 7d, and 7f levels during the proliferative phase may serve as a diagnostic marker for endometriosis.
expression analysis	406888	MIRLET7F1	25772772	The combination of serum let-7b, 7d, and 7f levels during the proliferative phase may serve as a diagnostic marker for endometriosis.
expression analysis	406889	MIRLET7F2	25772772	The combination of serum let-7b, 7d, and 7f levels during the proliferative phase may serve as a diagnostic marker for endometriosis.
expression analysis	406906	MIR122	23118427	The circulating miRNAs miR-199a, miR-122, miR-145*, and miR-542-3p could potentially serve as noninvasive biomarkers for endometriosis.
expression analysis	406911	MIR125B1	29040578	High MIR125B expression is associated with inflammation in Endometriosis.
polymorphism	406913	MIR126	28277133	rs4636297polymorphism may influence individual's susceptibility to endometriosis and its severity
expression analysis	406937	MIR145	23118427	The circulating miRNAs miR-199a, miR-122, miR-145*, and miR-542-3p could potentially serve as noninvasive biomarkers for endometriosis.
expression analysis	406940	MIR148A	29845209	The findings indicate that GPER/miR148a/HLAG signaling pathway may mediates the development of ovarian endometriosis and may become a potential therapeutic target for the treatment of endometriosis.
expression analysis	406952	MIR17	23203215	Plasma miR-17-5p, miR-20a and miR-22 are down-regulated in women with endometriosis compared with those without endometriosis.
expression analysis	406959	MIR183	24173391	downregulation of miR-183 expression is involved in the development and progression of endometriosis
expression analysis	406959	MIR183	26357653	MiR-183 may be involved in the development of endometriosis.
expression analysis	406966	MIR191	25819812	The miR-191-TIMP3 axis might be critical in the malignant transformation of endometriosis to endometriosis-associated ovarian cancer.
expression analysis	406966	MIR191	26191186	miR-191-DAPK1 axis may play an important role modulating the response of ovarian endometriosis and endometrioid carcinoma cells to TNF-alpha.
expression analysis	406972	MIR196A1	27619769	We showed that the miR-196a level is associated with reduced expression of progesterone receptor isoforms through MEK/ERK, suggesting that miR-196a and MEK/ERK are both potential biomarkers of endometriosis.
expression analysis	406973	MIR196A2	27741504	Our study thus uncovered a novel tumorigenesis pathway triggered by the cancer-related MIR196A2 risk allele during endometriosis development and progression.
expression analysis	406976	MIR199A1	23118427	The circulating miRNAs miR-199a, miR-122, miR-145*, and miR-542-3p could potentially serve as noninvasive biomarkers for endometriosis.
expression analysis	406982	MIR20A	22648654	miR20a is an important modulator in the development of endometriosis.
expression analysis	406982	MIR20A	23203215	Plasma miR-17-5p, miR-20a and miR-22 are down-regulated in women with endometriosis compared with those without endometriosis.
expression analysis	406982	MIR20A	24972566	Increased expression of miR-20a may play an important role in the pathogenesis of ovarian endometriosis by suppressing NTN4 expression.
expression analysis	406992	MIR210	25516558	miR-210 induces NESCs to differentiate into the endometriotic phenotype and we speculate that up-regulated miR-210 expression in ECSCs is involved in the creation of the endometriosis-specific cellular dysfunctions through epigenetic mechanisms.
expression analysis	407004	MIR22	23203215	Plasma miR-17-5p, miR-20a and miR-22 are down-regulated in women with endometriosis compared with those without endometriosis.
expression analysis	407010	MIR23A	23450049	MiR23a and miR23b are potential biomarkers of ovarian endometriosis.
expression analysis	407011	MIR23B	23450049	MiR23a and miR23b are potential biomarkers of ovarian endometriosis.
expression analysis	407026	MIR29C	27778641	High expression of MicroRNA-29c is associated with Progesterone Resistance in Endometriosis.
expression analysis	407040	MIR34A	28990049	VEGFA was overexpressed in endometriosis tissues, and we identified miR-34a-5p is able to target the VEGF gene, preventing the latter to function as an inhibitor of angiogenesis. These results imply that miR-34a-5p might regulate VEGFA in ESCs and might contribute to the pathogenesis of endometriosis.
expression analysis	442920	MIR196B	23293219	Data suggest that expression of MIR196B in stromal cells from endometriotic ovary is repressed by DNA hypermethylation of MIR196B gene; this repression may be involved in development of proliferative/anti-apoptotic characteristics of endometriosis.
expression analysis	574411	MIR451A	27920341	We conclude from this study that sera miR-451a levels positively correlated with endometriotic lesion content and are significantly greater compared to sera levels in women without visible signs or symptoms of endometriosis.
expression analysis	574493	MIR520H	23364396	The C allele of SNP rs7201 increases a risk for endometriosis because of out of regulation by microRNA-520g.
expression analysis	574506	MIR503	27619772	Our findings indicate that epigenetically repressed miR-503 in endometriotic stromal cells is involved in the acquisition of endometriosis-specific cellular functions.
expression analysis	664617	MIR542	23118427	The circulating miRNAs miR-199a, miR-122, miR-145*, and miR-542-3p could potentially serve as noninvasive biomarkers for endometriosis.
expression analysis	693120	MIR33B	28537685	MiR-33b can mediate cell apoptosis, alter VEGF and MMP-9 expression and affect proliferation and apoptosis of uterus endometrial cells, thus participating endometriosis formation.
expression analysis	100048912	CDKN2B-AS1	20601957	genome wide association study identified association of endometriosis with rs10965235 which is located in CDKN2BAS; SNP showing strongest association was located in intron 16 of CDKN2BAS and was implicated in regulating expression of p15, p16 and p14
expression analysis	100048912	CDKN2B-AS1	23142796	We confirm WNT4, CDKN2BAS and FN1 as the first identified common loci for endometriosis.
expression analysis	100048912	CDKN2B-AS1	25154675	Our results suggest that the rs10965235 SNP in the CDKN2B-AS gene and the rs16826658 SNP near the WNT4 gene were significantly associated with endometriosis in this Korean population.
expression analysis	100507436	MICA	25775242	This study suggests that NKG2D ligands shedding of MICA, MICB and ULBP-2 is a novel pathway in endometriosis complex pathogenesis that impairs Natural Killer Cells cell function.
expression analysis	101154644	LINCMD1	24502888	first report of lncRNA expression patterns in human ectopic and eutopic endometrial tissue from patients with ovarian endometriosis.
expression analysis	11651	Akt1	21718677	mTOR/AKT inhibition by temsirolimus decreased endometriotic cell proliferation both in vitro and in vivo in a mouse model of deep infiltrating endometriosis
expression analysis	11651	Akt1	24605828	Data suggest that activation/phosphorylation/post-translational protein processing of Akt plays activ role in establishment of ectopic endometrial tissues as in endometriosis; phosphorylation of Akt at serine-473 appears to be involved.
expression analysis	11819	Nr2f2	24423359	Critical function of proinflammatory cytokines and the COUP-TFII regulatory gene network in the progression of endometriosis.
expression analysis	12034	Phb2	26653759	REA modulates cross talk among multiple cell types in the uterine tissue and host background, serving as a brake on the estradiol-ER axis and restraining multiple aspects that contribute to the pathologic progression of endometriosis.
expression analysis	12491	Cd36	20035060	A potential mechanism of immune dysfunction during endometriosis development.
expression analysis	12767	Cxcr4	25957946	The estradiol-CXCL12/CXCR4 signaling pathway may be useful in determining treatments for endometrial disorders, and may be antagonized to block stem cell migration to endometriosis.
expression analysis	12778	Ackr3	29587613	Study shows that overexpression of CXCR7 in different cellular populations of endometriosis microenvironment may play a role in the pathogenesis and represent a novel target for treatment.
expression analysis	13609	S1pr1	26193952	GPER and Gankyrin might be implicated in the hormonal regulation of endometriosis and be associated with the severity of endometriosis.
expression analysis	13982	Esr1	28927243	Data (including data from studies using knockout mice) suggest that early initiation of endometriosis is predominantly dependent on immune system; cross-talk occurs between Esr1 and Il6 pathways during early initiation of endometriosis lesion development; estradiol stimulation of Esr1 appears to play minor role in early lesion development. (Esr1 = estrogen receptor alpha; Il6 = interleukin 6)
expression analysis	14103	Fasl	21978769	mononuclear cell protein levels decrease with the disease progression while soluble protein levels increase in women with endometriosis
expression analysis	16153	Il10	24326257	IL-10 may suppress immunity against endometrial implants, contributing to development of endometriosis.
expression analysis	16193	Il6	22536401	Elevated levels of IL-6 associated with endometriosis and pelvic inflammation may reduce the fertilizing capacity of oocytes.
expression analysis	16193	Il6	28927243	Data (including data from studies using knockout mice) suggest that early initiation of endometriosis is predominantly dependent on immune system; cross-talk occurs between Esr1 and Il6 pathways during early initiation of endometriosis lesion development; estradiol stimulation of Esr1 appears to play minor role in early lesion development. (Esr1 = estrogen receptor alpha; Il6 = interleukin 6)
expression analysis	16423	Cd47	29105884	this study shows that inhibition of IAP represses inflammatory status via nuclear factor-kappa B pathway in murine endometriosis lesions
expression analysis	16601	Klf9	24476135	in endometrial stromal cells, KLF9 provides coincident regulation of Notch, Hh, and steroid receptor signaling pathways, which when deregulated, underlie establishment and/or progression of endometriosis
expression analysis	16819	Lcn2	24194573	results suggest that stressful cellular microenvironments cause uterine tissues to secrete lipocalin 2 and results in epithelial-mesenchymal transition of endometrial epithelial cells, which may correlate with the development of ectopic endometriosis
expression analysis	16846	Lep	17962343	leptin signaling is a necessary component in lesion proliferation, early vascular recruitment, and maintenance of neoangiogenesis in a murine model of endometriosis
expression analysis	16852	Lgals1	24979200	These results underline the essential role of Gal-1 during endometriosis
expression analysis	17390	Mmp2	20407871	The changes in the MMP-2 and MMP-9 might be involved in pathogenesis of endometriosis.
expression analysis	17392	Mmp3	20609072	Early induction of MMP-3 was distinct from MMP-9 during endometriosis, which was regulated by c-Fos and TIMP-3. Melatonin suppressed MMP-3 activity and amplified apoptosis while regressing endometriosis through a caspase-3 mediated pathway.
expression analysis	17395	Mmp9	18298469	the role of melatonin in arresting peritoneal endometriosis in mice and a novel marker, expression ratio of proMMP-9 versus TIMP-1, was identified for assessing severity and progression of endometriosis.
expression analysis	17395	Mmp9	20407871	The changes in the MMP-2 and MMP-9 might be involved in pathogenesis of endometriosis.
expression analysis	17829	Muc1	19841240	anti-MUC1 antibodies and Foxp3+ regulatory T cells are present in a mouse model for human MUC1-positive endometriosis
expression analysis	17977	Ncoa1	22660634	A previously unidentified 70-kDa SRC-1 proteolytic isoform is highly elevated both in the endometriotic tissue of mice with endometriosis and in endometriotic stromal cells biopsied from patients with endometriosis.
expression analysis	18033	Nfkb1	21196337	p50 is involved in the development of endometriosis and may be a promising therapeutic target.
expression analysis	18128	Notch1	24476135	in endometrial stromal cells, KLF9 provides coincident regulation of Notch, Hh, and steroid receptor signaling pathways, which when deregulated, underlie establishment and/or progression of endometriosis
expression analysis	20315	Cxcl12	23650939	blocking antibodies reduce neovascularization of lesions in a mouse model of endometriosis
expression analysis	20315	Cxcl12	25957946	The estradiol-CXCL12/CXCR4 signaling pathway may be useful in determining treatments for endometrial disorders, and may be antagonized to block stem cell migration to endometriosis.
expression analysis	20344	Selp	25681855	Targeting P-selectin-mediated platelet adhesion onto endometriotic lesions holds promise as a novel therapeutics for treating endometriosis.
expression analysis	20371	Foxp3	19841240	anti-MUC1 antibodies and Foxp3+ regulatory T cells are present in a mouse model for human MUC1-positive endometriosis
expression analysis	20423	Shh	24476135	in endometrial stromal cells, KLF9 provides coincident regulation of Notch, Hh, and steroid receptor signaling pathways, which when deregulated, underlie establishment and/or progression of endometriosis
expression analysis	20606	Sstr2	20739383	Overexpressed in endomterium inendometriosis.
expression analysis	21803	Tgfb1	27384304	TGFbeta and KLF11 mediate critical, translationally relevant host and lesion-driven responses that enable establishment and progression of endometriosis.
expression analysis	21847	Klf10	27488034	In an animal endometriosis model, unlike wild-type controls, Klf10(-/-) animals developed cystic lesions with massive immune infiltrate and minimal peri-lesional fibrosis. The Klf10(-/-) disease progression phenotype also contrasted with prolific fibrosis and minimal immune cell infiltration seen in Klf11(-/-) animals.
expression analysis	21857	Timp1	18298469	the role of melatonin in arresting peritoneal endometriosis in mice and a novel marker, expression ratio of proMMP-9 versus TIMP-1, was identified for assessing severity and progression of endometriosis.
expression analysis	21937	Tnfrsf1a	28676525	The deficiency of TNFRp55 promoted the development of endometriosis.
expression analysis	26427	Creb3l1	26917262	The results suggest that CREB3L1 is required for decidualization in mice and humans and may be linked to the pathogenesis of endometriosis in a progesterone-dependent manner.
expression analysis	50794	Klf13	25904015	Results demonstrate lack of a causative relationship between endometrial KLF13 deficiency and lesion establishment in mice, and they support the broader participation of multiple signaling pathways in the pathology of endometriosis.
expression analysis	56717	Mtor	21718677	mTOR/AKT inhibition by temsirolimus decreased endometriotic cell proliferation both in vitro and in vivo in a mouse model of deep infiltrating endometriosis
expression analysis	194655	Klf11	23555910	Data identify a novel pathogenic role for KLF11 in preventing de novo disease-associated fibrosis in endometriosis.
expression analysis	194655	Klf11	27384304	TGFbeta and KLF11 mediate critical, translationally relevant host and lesion-driven responses that enable establishment and progression of endometriosis.
expression analysis	387244	Mirlet7a-1	27655771	let-7a-5p was decreased in the serum of mice with endometriosis. Serum let-7 family miRNA shows similar dysregulation in endometriosis in both humans and mice. Diminished circulating let-7 implies a complex regulation that potentially involves multiple organs.
expression analysis	24330	Egr1	23427178	Interactions between elevated peritoneal fluid TNF-alpha and overexpression of follicular Egr1 expression may affect downstream protease pathways impeding ovulation in endometriosis.
expression analysis	24408	Grin1	27089914	Study demonstrates that in the rat model, endometriosis can be associated with a decrease in mu opioid receptors (MOR)immunoreactivity within neuronal compartments in addition to a shift in MOR and N-methyl-d-aspartate subunit receptor (NR1) receptor expression within the ventral periaqueductal gray.
expression analysis	24835	Tnf	20813690	Sinomenine can inhibit the production and activity of TNF-alpha and NF-kappaB to suppress the adhesion, implantation, infiltration and growth of the endometrial cells in the rat model of endometriosis.
expression analysis	24835	Tnf	23427178	Interactions between elevated peritoneal fluid TNF-alpha and overexpression of follicular Egr1 expression may affect downstream protease pathways impeding ovulation in endometriosis.
expression analysis	24835	Tnf	25049286	Colchicine resulted in regression of endometrial implant volumes in experimental rat endometriosis model and decreased peritoneal and tissue TNF-alpha levels.
polymorphism	25329	Lhb	20430510	data suggest that LHbeta G1502A polymorphism may be involved in the predisposition to infertility and minimal/mild endometriosis-associated infertility, although endometriosis might be only a coincidental finding along with infertility.
expression analysis	25399	Cacna2d1	25935199	there was an increased Cavalpha2delta-1 expression in the dorsal horn and an ectopic growths-to-colon cross-sensitization in female rats with established endometriosis
expression analysis	25601	Oprm1	27089914	Study demonstrates that in the rat model, endometriosis can be associated with a decrease in mu opioid receptors (MOR)immunoreactivity within neuronal compartments in addition to a shift in MOR and N-methyl-d-aspartate subunit receptor (NR1) receptor expression within the ventral periaqueductal gray.
expression analysis	25608	Lep	25722014	HCG therapy appears to be an effective treatment for endometriosis in rats through down-regulation of leptin expression in eutopic and ectopic endometrium
expression analysis	81736	Nfkb1	20813690	Sinomenine can inhibit the production and activity of TNF-alpha and NF-kappaB to suppress the adhesion, implantation, infiltration and growth of the endometrial cells in the rat model of endometriosis.
expression analysis	83810	Trpv1	28627595	TRPV1 expressed in dorsal root ganglia may serve an important role in endometriosis-associated pain.
expression analysis	245920	Cxcl10	20452033	upregulated in endometriosis tissues
expression analysis	287526	Serpinf1	22975116	PEDF might be involved in the pathogenesis of endometriosis and may lead to novel treatment for this disease
expression analysis	681706	Fpr2l	15996849	Expression of LXA4 receptor was augmented in endometrium tissues of endometriosis suggesting a possible involvement in development and progression of endometriosis.
expression analysis	6775079	COX2	27132422	Findings suggest that the -1195 A/G on the promoter region of COX-2 gene may increase the risk of pain occurrence in women with endometriosis, possibly by affecting the rate of gene expression, especially in patients with the pain phenotype.
expression analysis	8289	ARID1A	30107668	Seven cases were associated with cystic endometriosis of the ovary. All tumors consisted of irregular and crowded glands or cysts embedded in a fibromatous stroma. The cysts and glands were lined by mild to moderate atypical cells.CK7 and HNF-1beta were expressed in all cases, and Naspin A was expressed in 11 cases. ARID1A expression was absent in 5 cases and p53 showed wild-type expression. None…
mutational and expression analysis	6387	CXCL12	30106199	At first, studies focused on signaling by CXCL12 via its well-known receptor, CXCR4. However, the discovery of CXCR7 as another receptor for CXCL12 with rather high binding affinity and recent reports about its involvement in endometrial disease and cancer progression has questioned the potential of "selective blockade"' of CXCR4 to treat these ailments
expression analysis	100506621	LINC01279	30106115	Long intergenic nonprotein coding RNA 1279 (LINC01279) was significantly upregulated in the three datasets, and was the most upregulated lncRNA as determined by the RankProd method. gene set enrichment and gene Ontology analyses were conducted, which revealed that LINC01279 is likely to function as a cell cycle mediator in endometriosis.
expression analysis	7421	VDR	30096760	The effect of the active form of the vitamin as an anti-proliferative, pro-apoptotic, anti-inflammatory, and differentiation-inducing agent has been demonstrated in various endometrial cancer cell lines.
expression analysis	57716	PRX	22843871	Nuclear PRX II and 8-OHdG were down-regulated in EAC tumorous tissue compared with BE and EAC endometriotic tissue, suggesting a role of oxidative stress in the pathogenesis of EAC
expression analysis	5163	PDK1	30092712	Molecular characterization reveals that overexpression of PDK1 is induced by hypoxia through transcriptional regulation. Upregulation of PDK1 in ectopic endometriotic stromal cells was accompanied by increases in lactate production and oxygen consumption rate when compared to eutopic endometrial stromal cells.
PCR-RFLP	10	NAT2	30090210	The NAT2 G590A SNP may be associated with susceptibility to endometriosis and the 590A allele may have a protective role in development of endometriosis.
PCR	841	CASP8	30036894	The polymorphisms in the CASP8 gene were not associated with endometriosis.
Meta-analysis	4313	MMP2	30030390	Meta-analysis was conducted to explore the difference in the positive rate of MMP-2 expression between patients with endometrial cancer and those with endometriosis or normal endometrium, and to investigate the associations of MMP-2 expression with clinicopathologic characteristics of patients with endometrial cancer.
RT_PCR	5278, 8289	PTEN, ARIDIA	30020448	gene expression from paired-endometriosis samples showed significant downregulation of PTEN, ARID1A and TNFalpha (P < 0.05) in endometrioma compared with paired-endometrium SC+ samples.
mutational analysis	6943	TCF21	30018006	Transcription factor 21 (TCF21) belongs to the helix-loop-helix (bHLH) family characterized by regulating gene expression via binding to E-box element.
expression analysis	3579	CXCR2	30015967	In conclusion, a bioinformatics approach combined with in vitro experiments in the present study revealed that CXCR2 may be associated with the development of endometriosis and has potential as a biomarker for the diagnosis of endometriosis
RT-PCR	6623	SR	30010222	SR has a regressive effect on the development of murine endometriosis-like lesions.
PCR_RFLP	1586	CYP17A1	29995789	CYP17A1 rs743572 polymorphism might contribute to endometriosis susceptibility: evidences from a case-control study.
expression analysis	9474	ATG5	29992166	Our results indicate that the inhibition of autophagy and exogenous expression of fascin-1 may promote the invasiveness of endometrial cells. As a corollary, autophagy represents a potential target for the treatment of EM
mutationaal analysis	324	APC	29973760	They may be hereditary (in association with FAP, i.e. familial adenomatous polyposis syndrome resulting from APC gene mutation) or sporadic, with hereditary cases having a much higher risk of developing DF compared to sporadic ones.
expression analysis	5743	PTGS2	29962266	These results suggest that the estrogen-autophagy-STAT3-HCK axis participates in the differentiation of PTGS2(high) IFNG(low) PRF1(low) GZMB(low) FCGR3(-) NK cells in ELM and contributes to the development of EMS.
mutational analysis	29775, 84433	CARD10, CARD11	29928437	4 novel somatic mutations in the CARD10 and CARD11 genes were identified from amongst 101 cases of ovarian endometriosis for the first time, these mutations may serve active roles in the development of ovarian endometriosis.
mutational analysis	5278, 8289	PTEN, ARIDIA	29928400	The observations of the present study suggest that the PTEN mutation represents an early event in EBT tumorigenesis, while additional genetic alterations may be necessary to activate the PI3K/AKT signaling pathway and induce the development of the invasive carcinoma.
PCR	3206, 3977, 5241	HOXA10,LIFR and PGR	29927435	alphavbeta3 integrin, LIF, glycodelin A, and HOXA10 and increases in the synthesis of aromatase and in the imbalance of endometrial stromal expression of ER and PR detected by immunohistochemistry (IHC). Molecular genetic study showed lower mRNA expression levels of the HOXA-10, LIFR, and PgR genes, which confirms the data obtained by IHC.
RT_PCR, ELISA and imunohistochemistry	6387, 7852	SDF1, CXCR4	29925169	The high expressions of SDF-1 and CXCR-4 in endometriosis as well as SDF-1 through its specific receptor CXCR-4 promoted the mitosis and proliferation of endometrial stromal cells, suggesting that SDF-1 and CXCR-4 played important roles in the pathogenesis of endometriosis.
expression analysis	27178	IL37	29924731	These findings suggest that IL-37 suppresses cell proliferation, adhesion, migration, and invasion of human ESCs through multiple signaling pathways, thereby affecting the occurrence and development of EMs.
expression analysis	27250	PDCD4	29912279	these results suggest that PDCD4 could be involved in the pathogenesis of EM, and provide a novel approach to target the aberrant PDCD4 expression in EM
expression analysis	3569, 3576	IL6, IL8	29901132	The expression of the inflammatory cytokines interleukin (IL)6 and IL8 was significantly increased in endometriotic and cocultured cells compared with healthy ECs. IL6 expression was strongly correlated with IL8 expression in endometriotic cells.
expression analysis	2308	FOXO1	29886768	Only the combination with human chorionic gonadotropin led to induction of FOXO1 protein expression and a significant physiologic transformation of the ectopic endometrial stromal cells after seven days of treatment. After termination of human chorionic gonadotropin treatment, the decidualization process continued, leading to a significant inhibition of proliferation. Thus, decidualization of hum…
expression analysis	4790	NFKB1	29871974	Nobiletin also showed remarkably impairment on the activation of NF-kappaB in promoting endometriotic cells, likely targeting on the activity of IkappaB kinases (IKKs). The present study provides the first evidence that nobiletin exerts protection on endometriosis via inhibition the activation of NF-kappaB, specifically on the activity of IkappaB kinases.
RT_PCR	6774	STAT3	29871794	Activation of STAT3 by IL-6 up-regulated Adm mRNA expression in Ishikawa cells. ADM protein levels were elevated in the eutopic endometrium of women with endometriosis
quantitative PCR-based microarrays	406946	MIR154	29857988	miRNA seem to be promising candidates for the non-invasive diagnosis of endometriosis.
mutational analysis	10664	CTCF	29845264	the present study identified 2 potential pathogenic CTCF mutations in endometriotic lesions from 2/92 patients with ovarian endometriosis. These results, together with a prior exomesequencing based study, suggest that CTCF mutations may be involved in the development of ovarian endometriosis.
Reverse transcriptionquantitative polymerase chain reaction	406940	miR148a	29845209	The findings indicate that GPER/miR148a/HLAG signaling pathway may mediates the development of ovarian endometriosis and may become a potential therapeutic target for the treatment of endometriosis.
expression analysis	100302145, 100302177	hsa-mir-1247, hsa-mir-1269a	29805512	Abnormal expression of hsa-mir-1247 and hsa-mir-1269a may be risk factors for ectopic pregnancy. Abnormal expression of hsa-mir-1247 and hsa-mir-1269a found in patients with ectopic pregnancy due to salpingitis may be used as biomarkers of ectopic pregnancy
expression analysis	58191, 10663	CXCL16, CXCR6	29779473	These findings indicate that the CXCL16/CXCR6 axis may contribute to the progression of endometriosis and could be served as a potential target for diagnosis and treatment.
qRT-PCR	100885779	Linc-ROR	29762822	Linc-ROR is highly expressed in the ectopic endometrium of adenomyosis, and it can promote the proliferative activity of endometrial cells by activating the PI3K-Akt pathway.
expression analysis	406970	miR-194-3p	29762665	study demonstrated that miR-194-3p contributes to progesterone resistance in endometriosis, which hinders fertility by repressing the levels of PR and decidualization in the EuE. Thus, miR-194-3p regulation is a future therapeutic strategy for endometriosis
expression analysis	27161	PPD	29760378	These results suggest that PPD plays a role in anti-EMS activation, possibly by restricting estrogen-mediated autophagy regulation and enhancing the cytotoxicity of NK cells. This result provides a scientific basis for potential therapeutic strategies to treat EMS by PPD or further structural modification.
qRT-PCR	3593	IL12B	29738836	The rs17860508 polymorphism in the IL12B promoter region may influence the risk of developing ovarian endometriosis by altering the endometrial expression of IL12B of in Northern Chinese women
PCR	2625, 50943	GATA3, FOXP3	29736151	the revealed changes in expression of transcription factors may indicate the imbalance between T-helper cells of the Th1 and Th2 type and elimination of regulatory function of T-cells, which can be one of the causes of endometriosis predisposing to the development of infertility associated with this disease.
qRT-PCR	63027	SLC22A23	29703252	Although the exact function is unknown, single nucleotide polymorphisms (SNPs) which are located in SLC22A23 gene were associated with inflammatory bowel disease (IBD), endometriosis-related infertility and the clearance of antipsychotic drugs
expression analysis	1749, 1750	DLX5, DLX6	29692624	We identified a signature of 30 genes similarly deregulated in human endometriosis implants and in Dlx5/6-null mouse uteri, reinforcing the notion that the downregulation of Dlx5/6 is an early event in the progress of endometriosis
expression analysis	2492	FSHR	29683332	Polymorphisms in FSHR gene were previously associated with variability in FSH serum level and reproductive outcomes, but its relation with endometriosis has not been clarified and demonstrated conflicting results, ranging from strong links to no association to endometriosis.
expression analysis	10963	STIP1	29673672	The G/G allele of STIP1 SNP rs4980524 is associated with the increased expression of STIP1 and MMP9 in endometriosis
expression analysis	3553	IL-1	29669463	The results suggest alteration in the expression the IL-1 family transcripts either alone or as a complex milieu could have a significant influence on endometriosis and should be prioritized for future study on the implications of inflammation on endometriotic lesions
PCR	3164	NR4A1	29669342	NR4A1 can regulate fibrosis in endometriosis and may serve as a new target for the treatment of endometriosis.
RT-qPCR	3284, 3292, 3294, 2099, 2100, 367	HSD3B2, HSD17B1, HSD17B2, ESR1, ESR2, AR	29664547	Observed significant increase in HSD3B2 and ESR1 transcripts in follicular eutopic endometrium from infer-tile women with endometriosis may be related to abnormal biological effect of E2 in endometrium, further affecting the development of human embryos.
expression analysis	10848, 5347	IASPP, PLK1	29663364	The expression of inhibitory member of the ASPP family proteins (iASPP) and Polo-like kinase (PLK)1 were significantly higher in OCCC compared to benign cystadenomas and endometriosis
RT-PCR	406996	miR-214	29660008	The mice were treated with miR-214-enriched exosomes or controls to confirm the effect of inhibiting CTGF overexpression on endometriosis fibrosis.
expression analysis	3206	HOXA10	29658437	Compared with normal endometrium, only protein expression levels of autophagic biomarkers were increased in the eutopic endometrium of women with endometriosis. Moreover, HOXA10 was found to have a significant negative correlation with autophagy ( P < .01). Serum CA125 was at a high level in endometriosis and increased with elevated revised American Fertility Society staging (I-IV).
expression analysis	6387	CXCL12	29652725	In the setting of overwhelming injury, especially in the setting of low estrogen levels, there may be insufficient stem cell recruitment to adequately repair the uterus resulting in conditions such as Asherman syndrome or other endometrial defects. In contrast, excessive recruitment of stem cells underlies endometriosis.
expression analysis	5111, 947, 3091	PCNA, CD34, HIF-1alpha	29636775	In this study, SZD significantly reduced the size of ectopic lesions in rats with endometriosis, inhibited cell proliferation, increased cell apoptosis, and reduced microvessel density and HIF-1alpha expression. It suggested that SZD could be an effective therapy for the treatment and prevention of endometriosis recurrence
expression analysis	6714	SRC-1	29636364	Collectively, the bufalin-induced disruption of the SRC-1 isoform/ERbeta axis might induce apoptosis, pyroptosis and ERS signaling in endometriotic lesions, causing the suppression of endometriosis. Therefore, future generations of SRC-modulators could be employed as an alternative medical approach for endometriosis treatment
expression analysis	682	CD147	29630856	These findings suggest a previously undefined role of CAS in regulating EMT and reveal the involvement of a CD147-induced EMT signaling pathway in pathogenic progression of EMS
expression analysis	2099, 2100, 5241	ESR1, ESR2, PGR	29629944	the expression of ovarian steroid hormone receptors for estrogen alpha (ESR1), estrogen beta (ESR2), and progesterone (PGR) in different types of endometriotic lesions and eutopic endometrium from women with endometriosis and controls using a tissue microarray (TMA). Nuclear expression levels of the receptors were analyzed by tissue (ie, ectopic vs. eutopic endometrium) and cell type (ie, glands …
mutational analysis	406991	MIR21	29625267	MicroRNA-21 (miR-21) is an important regulator of cell signaling pathways involved in the pathogenesis of endometriosis
RT-PCR	960	CD44	29621955	Standard CD44 expression does not differ in eutopic menstrual endometrial cells from women with and without endometriosis.
expression analysis	9170, 2846	LPAR2, LPAR4	29621954	Owing to the high LPAR2 and LPAR4 transcript and protein expression in endometriotic ovarian cysts and positive correlations of both these receptors with the PR-B and ERbeta, respectively, those receptors seem to be the most promising predictors of the endometriotic cysts as well as the main receptors responsible for LPA action in the ovarian endometriosis.
qRT-PCR	619554	MIR486	29605406	MiRNAs seem to be involved in the peritoneal alterations in endometriosis, suggesting new mechanisms by which ectopic lesions could implant in endometriosis patients; and to serve as biomarkers for fertility outcome prediction
mutational analysis	8289	ARIDIA	29599905	Our results suggest that the frequency of ARID1A mutations in ERONs may be higher than that previously reported. In addition, the "liquid microdissection" method that we chose for DNA purification could be used to obtain high-quality sequencing results. The findings suggest that ARID1A mutations represent the basis of ERON carcinogenesis; other subsequent gene mutations may result in the progress…
RT-PCR	3206	HOXA10	29592776	Since it is well known that aberrant expression of HOXA10 is involved in pathogenesis of the endometrium, our data emphasized the epigenetic role of this gene aberration related to clinical pathophysiology of endometriosis
expression analysis	972	CD74	29592775	these data support the hypothesis that CD74 is elevated in endometriotic lesion tissue and may contribute to the pathogenesis of endometriosis by promoting cell survival
expression analysis	57007	CXCR7	29587613	overexpression of CXCR7 in different cellular populations of endometriosis microenvironment may play a role in the pathogenesis and represent a novel target for treatment.
expression analysis	9235	IL-32	29562285	IL-32 signaling pathways may contribute to development a more effective treatment of endometriosis
expression analysis	4316	MMP7	29558202	In vitro studies revealed that increased expression of MMP-7 as well as epidermal growth factor (EGF), which was significantly elevated in severe stages of ovarian endometriosis, induced EMT in endocervical epithelial cells (End1/E6E7). Silencing the MMP-7 transcripts using small interfering RNA attenuated EMT responses, whereas treatment with recombinant active MMP-7 promoted EMT by cleaving E-c…
expression analysis	6277	S100A6	29544367	the abnormal expression of S100A6 may contribute to the pathogenesis of endometriosis and the S100A6/CacyBP/p38 signaling may provide as a promising treatment target
expression analysis	54658	UGT1A1	29540112	n addition, expression of UGT1A1 protein was greater in deep-infiltrating than in non-deep-infiltrating endometriotic lesions. We suggest that the finding of increased expression of UGT1A1 in lesions versus endometria might be related to impairment of regulatory mechanisms, in response to a highly estrogenic milieu, and that this enzyme may be a new target for therapy
PCR	4314, 4319	MMP-3, MMP-10	29535049	The mRNA and protein levels of MMP-3 and MMP-10 in ESCs treated with PCB 104 were higher than that in the control, with a dose- and time-dependent manner in mRNA level, while the expression of MMP-2, MMP-9, TIMP-2, E-cadherin, Snail and Slug did not change significantly. Taken together, PCB 104 promotes migration and invasion of ESCs by inducing the expression of MMP-3 and MMP-10, which may invol…
expression analysis	5054	PAI-1	29518247	In addition, endometriotic lesions from the PAI-1 inhibition group showed a decreased percentage of neovascularization as well as fibrin deposits. However, the density and distribution of collagen were not affected by PAI-039. Our results suggest that in vivo inhibition of PAI-1 by PAI-039 may be a useful strategy to reduce endometriotic lesion size by blocking angiogenesis
expression analysis	29092, 998, 51198 55591	LINC00339, CDC42, CDKN2A-AS1 and VEZT	29506960	Potential target genes in three chromosome regions showing altered gene regulation include LINC00339 and CDC42 on chromosome 1, CDKN2A-AS1 on chromosome 9, and VEZT on chromosome 12. Further functional studies are needed to confirm the causal genes in these and other regions to understand pathways that increase endometriosis risk and help identify novel targets for interventions to improve diagno…
mutational analysis	8289, 5290, 5518, 3845	ARID1A, PIK3CA, PPP2R1A, KRAS	29044863	The frequently mutated genes are ARID1A (66.7%), PIK3CA (50%), PPP2R1A (18.8%), and KRAS (16.7%). Somatic mutations important for selection of chemotherapeutic agents, such as BRAF, ERBB2, PDGFRB, PGR, and KRAS are found in 27.1% of OCCC cases, indicating clinical importance of exome analysis for OCCC. Our study suggests that the genetic instability caused by either mismatch repair defect or acti…
statistical analysis	7157	TP53	29479097	association of different genotypes was not significant in patients with moderate-to-severe endometriosis (p=0.574). The presence of pro/pro genotype enhanced the chances/odds of getting the disease (p<0.05). However, the risk further increased with the advancement of age, particularly in the 27-46 age group (p<0.05)
expression analysis	7040, 3574, 3600	TGFB, IL7, IL15	29477012	mRNA expression of Transforming Growth Factor Beta (TGFB), Interleukin (IL)10, Interferon Gamma (IFNG), IL7, and IL15 was analyzed by Real-Time PCR in eutopic endometrium and rectosigmoid lesions from 11 women with deep infiltrating endometriosis and in eutopic endometrium from 11 healthy women. IL10, IFNG, and IL7 expression was significantly higher in endometriotic bowel lesions than in eutopic…
expression analysis	6647	SOD1	29464366	These findings raise the possibility of a deleterious influence of PF from women with EI/II on the oocyte, not only after ovulation but also during the maturation process, which could contribute to worsening oocyte quality, being one of the mechanisms related to infertility in patients with endometriosis.
qPCR	6423	SFRP2	29462326	The highly expressed SFRP2 and CTNNB1 improve endometriosis lesion border detection, which can have clinical implications for better visualization of endometriosis lesions over CD10. Furthermore, SFRP2 acts as a canonical WNT/CTNNB1 signaling agonist in endometriosis and positively regulates endometriosis lesion growth, suggesting that the WNT pathway may be an important therapeutic target for en…
expression analysis	3206	HOXA10	29459744	These studies reveal a novel pattern of HOXA10 regulation via PEST sequence-mediated calpain proteolysis that was demonstrated to be reversed by a calpain inhibitor. Thus, the inhibition of CAPN7-induced HOXA10 degradation may represent a novel potential therapeutic method to improve impaired embryo implantation in women with ENDO
expression analysis	9776, 9140	ATG13, ATG12	29457968	The present findings suggest that a novel strategy for treatment of endometriosis may involve decreasing the number of endometriotic cells that can survive treatment and then preventing regrowth by autophagy inhibition
expression analysis	4485	MST1	29448246	Collectively, our results comprehensively described the important role of the NR4A-miR181c-Mst1 pathway in endometriosis, which handled mitochondrial apoptosis and F-actin/ lamellipodium-based migration via the regulation of Drp1-related mitochondrial fission and Parkin-required mitophagy, with a potential application in endometriosis therapy by limiting ESCs migration and promoting apoptosis
expression analysis	9447, 114548	AIM2, NLRP3	29423077	high expression levels of AIM2 and NLRP3, initiating proteins of inflammasomes, were significantly correlated with poor progression-free survival. Immunohistochemistry staining confirmed a correlation between high AIM2 and high Ki-67 in clinical EAOC samples, supporting its role in disease progression. Collectively, we established a bioinformatic platform of gene-set integrative molecular functio…
expression analysis	2146	EZH2	29408993	Inhibition of EZH2 reduced H3K27me3 levels in the endometriotic cells specifically, and also reduced migration, proliferation but not invasion of endometriotic epithelial cells (12Z). These findings support future preclinical studies to determine in vivo efficacy of EZH2 inhibitors as promising nonhormonal treatments for endometriosis, still an incurable gynecological disease.
expression analysis	2627	GATA6	29402198	GATA6 alone is essential but not sufficient for estrogen formation in endometriosis. However, simultaneous addition of GATA6 and NR5A1 to an endometrial stromal cell is sufficient to transform it into an endometriotic-like cell, manifested by the activation of the estradiol biosynthetic cascade
expression analysis	6822	DHEA	29397924	DHEA can enhance in vitro decidualization responses of hESF from women of advanced reproductive age. Supplementation with DHEA during the receptive phase may augment endometrial function and improve pregnancy rates in natural or assisted reproductive cycles
mutational analysis	55809	TRERF1	29393434	The evolutionary conservation analysis and in silico prediction of these TRERF1 mutations suggested that they may be pathogenic. To the best of our knowledge, the present study was the first to identify 2 novel, potentially 'diseasecausing' TRERF1 somatic mutations in the endometriotic lesions in 2 out of 92 patients with ovarian endometriosis; therefore, TRERF1 mutations may be involved in the p…
mutational analysis	656	BMP8B	29386003	a potentially deleterious somatic heterozygous mutation in bone morphogenetic protein 8B (BMP8B) gene (c.1139A > G, Tyr380Cys) that was identified in the pulmonary metastasis and was absent from blood and uterine leiomyoma, and may play a facilitating role in the metastasizing of BML. The clonality assay confirmed a skewed pattern of X-chromosome inactivation, suggesting monoclonal origin of the …
expression analysis	554213	miR-449	29357938	The miRNA-TF-gene regulatory network consists of 22 miRNAs, 12 TFs and 430 corresponding genes. Specifically, some key regulators from the miR-449 and miR-34b/c cluster, miR-200 family, miR-106a-363 cluster, miR-182/183, FOX family, GATA family, and E2F family as well as CEBPA, SOX9 and HNF4A were suggested to play vital regulatory roles in the pathogenesis of endometriosis. CONCLUSION: Integrati…
expression analysis	406906, 406928	MIR122, MIR137	29334789	We identified 262 upregulated and 291 downregulated circRNAs, binding with 1225 MREs. The ceRNA network included 122 miRNAs and 137 mRNAs, which are involed in nine pathways. CONCLUSION: CircRNAs are differentially expressed in endometriosis, which might be related with pathogenesis of endometriosis
PCR	3603	IL16	29328375	Interleukin16 (IL16) is a proinflammatory cytokine playing a pivotal role in many inflammatory and autoimmune diseases as well as in the pathogenesis of endometriosis
meta analysis	4314, 7076	MMP, TIMP	29309889	a large number of MMP and TIMP gene polymorphisms were tested, no exclusive and unambiguous risk factors were identified for any of the disorders. The majority of statistically significant associations were confirmed in just one study. Additionally, we performed two meta-analyses for MMP9 rs3918242 polymorphism in endometriosis/adenomyosis and preeclampsia but found no association with either dis…
expression analysis	27178	IL-37	29308924	IL-37, IL-17A, IL-10, and IL-2 may play a significant role in immune response in endometriosis. IL-37 levels may be used as a diagnostic marker for endometriosis.
expression analysis	2305	FOXM1	29308746	we found that an ERK/FOXM1/matrix metalloproteinase-9 (MMP9) signaling pathway might result in the establishment and development of endometriosis. Finally, a thiostrepton concentration dependently reduced the expression of FOXM1, MMP9 and Bcl-2 in endometriotic lesions of the treated rats. Statistical significance was accepted for a value of P < 0.05 .
qPCR	407035, 406937	miR-31, miR-145	29308623	Different cellular biological processes, such as differentiation, proliferation, mitochondrial function, reactive oxygen species (ROS) production, invasion and decidualization, are deregulated in endometriosis. miR-31 and miR-145 are microRNAs (miRNAs) with potential roles, as shown in pathologies like cancers. We found that miR- 31 was under-expressed in patients with endometriosis, while miR-14…
expression analysis	4255	MGMT	29308563	In regions of endometriosis the expression of MGMT in epitheliocyte nuclei was shown to increase during stages I and II, but decreased in stages III and IV. The progression of endometriosis was accompanied by a gradual increase of study parameters in the nuclei and cytoplasm of stromal cells
expression analysis	24144	STIP	29304094	The preoperative serum STIP1 levels of patients with endometriosis/adenomyosis were significantly higher than those of the controls. In brief, our data suggest an association between STIP1 levels and endometriosis/adenomyosis
PCR	183	AGT	29303211	M235T polymorphism of the AGT gene seems unrelated to the development or the clinical course of en-dometriosis. No prognostic value has been found of the investigated polymorphism in predicting the effects of infertility treatment in women with endometriosis
mutational analysis	6491	STIL	29299762	More than 60% of women undergoing RRS were BRCAm negative or untested. Counselling of high-risk women without defined germline mutations remains a challenge for gynaecologists because the likelihood of removing STIC lesions or occult invasive cancer is low. Removal of coincidental pathology may give added value to RRS in these women
expression analysis	4780	NRF2	29288352	Transplantation of H2O2-treated stem cells may have protective effects against SCI through by increasing neurotrophic factors.
mutationa analysid	673, 1385	BRAF, CREB1	29286077	correlation analysis revealed that the protein expression of CREB1 was positively correlated with the transcript level and protein expression of wtBRAF. It is reasonable to speculate that CREB1 may activate the transcription of wtBRAF through directly binding to its promoter, increasing BRAF expression and regulating the cell proliferation, migration and invasion of endometriosis.
expression analysis	10397	NDRG1	29283328	The NDRG1 protein regulation of endometriosis is assumed to be associated with several important pathways. This review summarizes the relationship between NDRG1 and endometriosis, focusing on the potential function of NDRG1 in endometriosis through signaling pathways and discusses the additional research that is required for future studies
RT-PCR	170302	ARX	29275192	ARX is not associated with endometriosis and cannot be used as a biomarker for ovarian endometriosis. ARX is present in ovarian stroma and cells derived from ovarian stroma as well as in all types of sex cord-stromal tumors of the ovary and could thus be used as a marker for sex cord-stromal differentiation in ovarian tumors.
RT-PCR	6872	TAFI	29271982	TAFI is highly expressed in endometriosis and causes EMT, which accelerated the cell proliferation and cell invasion. Snail is an inhibitor of E-cadherin, which may participate in metastasis and invasion of endometriosis by mediating EMT
expression analysis	4314, 7076	MMP and TIMP	29266528	changes in DNA methylation at the promoter region of MMP2 could underlie the changes in its expression in the ectopic endometria from patients with endometriosis
expression analysis	90865	IL-33	29263351	IL-33 injections caused systemic inflammation, which manifested as an increase in plasma pro-inflammatory cytokines compared to control mice. Furthermore, endometriotic lesions from IL-33 treated mice were highly vascularized and exhibited increased proliferation. Collectively, we provide convincing evidence that IL-33 perpetuates inflammation, angiogenesis and lesion proliferation, which are cri…
expression analysis	664617	MIR542	29259466	Impairment of the differentiating capacity by the overexpression of miR-542-3p could influence the capacity for migration and invasion of endometriotic cells in an ectopic environment.
RT-PCR	407019	miR-27b-3p	29247225	A decrease in size and fibrotic character of endometrial lesions from the Rg3E groups was observed in vivo. In conclusion, Rg3 effectively altered fibrotic properties of HESCs from patients with endometriosis, which is likely associated with miR-27b-3p modulation.
PCR	3135, 10859, 10288	HLA-G, LILRB1, LILRB2	29234882	the role of polymorphisms of HLA-G and its receptors LILRB1 and LILRB2 in susceptibility to endometriosis and its progression
expression analysis	3170	FOXA2	29233503	these findings indicate that FOXA2 might be a progesterone-induced gene, which may participate in the 'metastatic' process of eutopic endometrium to ectopic loci in patients with endometriosis.
expression analysis	960	CD44	29229305	The expression level of CD44s, CD44V, and CD44v6 in the eutopic endometrium as well as the concentration of soluble CD44 in the endometrial fluid was decreased after modification of the circulating levels of 25(OH)D. It seems that the increased expression and extensive shedding of CD44 in eutopic endometrium play a role in the pathogenesis of endometriosis
expression analysis	10406, 94025	HE4, CA125	29226858	The serum expression level differences before and after surgery were statistically significant. As the number of chemotherapies increases, the Smac level increased, and HE4 and CA125 levels gradually decreased. Furthermore, Smac increased to normal at the end of the 2nd period of chemotherapy, while HE4 and CA125 decreased to normal in 2nd and 3rd period of chemotherapy, respectively. CONCLUSION:…
expression analysis	355	FAS	29226157	The high number of immune cells in PF in early stage endometriosis and their increased susceptibility to apoptosis confirm the role of the impaired peritoneal environment and immune defects in the development and progression of the disease
expression analysis	5715	p27	29216564	The expression of p27(kip1) in endometriosis is very low but has been found to increase following treatment with progesterone. However, estrogen exposure is considered as a major risk factor in developing endometrial cancer. Endometriosis endometrial cells cultures have also lower levels of p27(kip1) compared to heath endometrial cells cultures and restore the cell cycle balance when transduced w…
expression analysis	407031	miR-30c	29201189	Overexpression of miR-30c repressed the expression of PAI-1 mRNA and protein, while inhibition of miR-30c upregulated the expression of PAI-1 in ESCs. In addition, the invasion, migration, proliferation and adhesion of ESCs was repressed following the overexpression of miR-30c, whereas they were promoted when miR-30c expression was downregulated. The results of the present study indicated that mi…
expression analysis	1576	CYP3A4	29165700	When TCDD-exposed animals were treated with a HATI, Cyp3 messenger RNA levels and protein expression decreased along with disease progression. Fibrotic progression is ubiquitous in environmentally induced chronic, untreatable diseases; this report shows that relentless disease progression can be arrested through targeted epigenetic modulation of protective mechanisms
expression analysis	7852, 6387	CXCR4, CXCL12	29161347	the CXCR4-CXCL12 axis is functional in endometriosis cells, but the expression of CXCR4 varies among lesions. CXCL12 promoted proliferation, migration, and invasion of endometriotic cells, while inducing AKT phosphorylation and activity, but pharmacologically blocking this axis in the absence of the ligand induced their invasiveness
expression analysis	9518	NAG-1	29157123	Whether effects of TSA on NAG-1 gene expression are enhanced in the presence of 5-aza-2'-deoxycytidine (5-aza-dC) are also investigated; however, TSA-induced apoptosis was unaffected by 5-aza-dC. In conclusion, TSA induced apoptosis in HESCs via induction of NAG-1 expression. These results suggest that upregulation of NAG-1 contributes to TSA-induced apoptosis in HESCs
expression analysis	1604	DAF	29153978	The abnormal DAF expression potentially compromises embryo survival, contributing to understand the implantation failure in women with endometriosis
expression analysis	406906, 406976	miR-122, miR-199a	29149541	Serum miR-122 and miR-199a were significantly increased in endometriosis, indicating that these microRNAs might serve as biomarkers for the diagnosis of endometriosis.CI - (c) 2017 International Federation of Gynecology and Obstetrics
expression analysis	207	AKT	29140979	The present study demonstrates, for the first time, that ginsenoside Rg3 suppresses angiogenesis in developing endometrial lesions. The ginsenoside Rg3 inhibitory effect on the growth of the ectopic endometrium in EMs rats might occur through the blocking of the VEGFR-2-mediated PI3K/Akt/mTOR signaling pathway, thus halting angiogenesis and promoting the apoptosis of ectopic endometrial cells.
expression analysis	8289	ARID1A	29135119	The decreased gene and protein expression levels of ARID1A are related to the occurrence and development of endometriosis-associated ovarian cancer, especially OCCC.
expression analysis	7157, 5594	p53, MAPK	29133366	These findings provide evidence that parity, family history, and estrogen plus progesterone hormone therapy use may be differentially associated with tumor subtypes defined by p53 and MAPK expression.Impact: In future studies, other immunohistochemical markers or gene expression profiles that more clearly define these subtypes should be considered
expression analysis	8289	ARID1A	29131266	In endometriosis, the down-regulated ofARID1A gene was highly correlated with its promoter hyper-methylation. ROS decreased the expression level of ARID1A gene via regulating methylation of its promoter which contributing to the understanding of the pathogenesis of endometriosis. The possible mechanism of ARID1A gene promoter hyper-methylation is ROS up-regulated DNMT1gene expression
expression analysis	378938	MALAT1	29116025	The MALAT1/miR-200c sponge may be a potential therapeutic target for endometriosis
expression analysis	407011	MIR23B	29093245	MiR23b and Sp1 are involved in the pathogenesis of ovarian endometriosis, which may facilitate the formation of ectopic lesions
expression analysis	5478	CYPA	29081463	the increased expression of CyPA in ectopic endometrial tissue is associated with endometrioma recurrences and vascularity
expression analysis	8678	Beclin1	29063947	RA treatment induces autophagy and Beclin1 may play an important role in endometriosis progressi
SNP	717, 3122, 57381	C2, HLA-DRA, RHOJ	28881265	The most interesting observation shown in our study are regions associated with susceptibility to endometriosis of loci located near C2, HLA-DRA and RHOJ genes.
PCR	4312	MMPs	29043698	Our results suggest that genetic polymorphisms in MMP may impact male fertility
expression analysis	406911, 406884	125b-5p, Let-7b-5p	29040578	Endometriosis-derived miRNAs regulate macrophage cytokine production that contributes to inflammation associated with this condition
expression analysis	6347, 3569	CCL2, IL6	29036448	These results suggest a reciprocal activation of macrophages and endometriotic cells via the soluble factors CCL2 and IL6, which may contribute to the development of endometriosis.
mutational analysis	23331	TTC28	29032825	The TTC28-L1 transductions along with classical driver mutations were near ubiquitous across the tumors, suggesting that L1 activation likely occurred early in the development of EAOCs. TTC28-L1 transductions could potentially be used to determine clonal relationships and to track ovarian cancer progression.
expression analysis	999	CDH1	29018948	Down-regulation of E-cadherin expression may activate the Wnt/beta-catenin pathway in endometrial cells, which may together participate in the occurrence of endometriosis
expression analysis	3146	HMGB1	29017437	These results suggest that menstrual fluid has naturally high levels of HMGB1 and may promote endometriosis following retrograde menstruation when complexed with other factors such as LPS by inducing inflammation and angiogenesis.
expression analysis	221883	HOXA11-AS1	29017417	the study findings suggest that HOXA11-AS1 lncRNA may play a role in the development of peritoneal endometriosis, but HOXA11-AS1 may not influence endometrial receptivity in endometriosis-associated infertility
RT-PCR	407040	miRNA34a5p	28990049	the upregulation of miR34a5p suppressed EnSCs proliferation by targeting the 3' untranslated region of VEGFA. miR34a5p provides a novel avenue for the understanding of the development of endometriosis, and may facilitate the development of potential therapeutics against endometriosis.
expression analysis	1080	CFTR	28978008	Collectively, the present results suggest that the CFTR-NFkappaB-uPAR signaling may contribute to the progression of human endometriosis, and indicate potential targets for diagnosis and treatment.
expression analysis	3586, 7040	IL-10, TGF-beta	28971893	These results suggest that the interaction between macrophages and ESCs downregulates cytotoxicity of NK cells possibly by stimulating the secretion of IL-10 and TGF-beta, and may further trigger the immune escape of ectopic fragments and promote the occurrence and the development of EMS.CI - (c) 2017 Society for Reproduction and Fertility
expression analysis	4240	MFGE8	28967712	This study showed for the first time that MFG-E8 expression is impaired in the endometrium of patients with endometriosis and infertility during the window of implantation. Moreover, LIF is also diminished in the endometrium of these patients as shown before.
expression analysis	7130	TSG6	28963923	Results of PCR analysis and of immunohistochemistry revealed an increased expression of IL-1beta, TNF-alpha, IL-8 and of TSG-6 in the endometrium of endometriosic patients.
expression analysis	3569	IL-6	28962161	The results of the current study suggest that there may be an association between IL-6 and the presence and severity of pelvic endometriosis
expression analysis	6347	MCP-1	28950844	MCP-1 gene expression on endometriotic cyst was not significantly different between the simvastatin-treated and untreated groups (P = 0.99). CD68 expression was higher in the treatment group compared to the control group, but this was not statistically significant (P = 0.055).
expression analysis	3569	IL-6	28927243	Our data provide evidence that the early initiation of endometriosis is predominantly dependent on the immune system, whereas E2/ERalpha/IL-6-mediated cross-talk plays a partial role
meta analysis	7515	XRCC1	28926725	Our meta-analysis suggested that Arg399Gln in XRCC1 was associated with endometriosis risk. And especially in Asians, the A allele might be a preventive factor for this disease.
Immunofluorescence	8549	LGR5	28923287	Our results revealed the presence of aberrantly located LGR5(+) cells coexpressing epithelial markers in the stromal compartment of women with endometriosis. These cells have a statistically significantly different expression profile in deep-infiltrating endometriosis in comparison with other types of endometriosis, independent of the menstrual cycle phase
expression analysis	367	AR	28915409	AR gene CAG repeat polymorphisms are associated with the increased risk of mild endometriosis.
expression analysis	7040	TGF-beta	28903471	TGF-beta1 plays a major role in the development of peritoneal endometriosis lesions and that targeting this pathway may be of therapeutic potential
single nucleotide polymorphisms (SNPs)	54361, 55591	WNT4, VEZT	28901453	WNT4 and VEZT genes constitute the most consistently associated genes with endometriosis.
expression analysis	5024	P2X3	28898282	These obtained results suggest that P2X3 might be involved in endometriosis pain signal transduction via ERK signal pathway
qRT-PCR	407050, 406933, 406947	miR-93, miR-141, miR-155, miR-429, miR-200c, miR-205 and miR-492	28894379	The expression level was confirmed by qRT-PCR for miR-93, miR-141, miR-155, miR-429, miR-200c, miR-205 and miR-492. Using the interpretative program Ingenuity Pathway Analysis revealed several deregulated pathways due to abnormal miRNA expression in endometriosis and ovarian cancer, which in turn is responsible for pathogenesis; this differential expression of miRNAs can be exploited as a therape…
expression analysis	8856, 6927	PRR, HNF-1beta	21167248	Upregulation of PRRs expression may synergize with activation of HNF-1beta signaling to accelerate endometriosis proliferation and cause carcinogenesis.
expression analysis	1382, 64220	CRABP2, STRA6	23337719	Simvastatin interacts with the RA system, inducing the expression of the key protein regulating the uptake of retinol (STRA6) and the expression of apoptosis-promoting CRABP2. These effects may contribute to cooperative apoptosis-inducing effects of simvastatin and RA and support the examination of these compounds in the treatment of endometriosis.
SNP	54361, 55591, 2488, 3603	WNT4, VEZT, FSHB, IL-16	28849095	we conclude that more gene polymorphisms must be investigated in the members of this family to gain insight regarding a genotypephenotype correlation in endometriosis and the potential development of a personalized care for the patients based on these data
expression analysis	7422	VEGF	28849024	The data provide evidence that curcumin reduces cell survival in human endometriotic stromal cells, and this may be mediated via downregulation of the VEGF signaling pathway
expression analysis	1432	p38	28845752	These results suggest that rather than modulating cell survival, increased p38 MAPK activity in endometriotic cells contributes to the pathogenesis of endometriosis by promoting the local inflammatory milieu
expression analysis	5241, 1839, 3685, 3690, 6696	PGR, HBEGF, ITGAV, ITGB3, SPP1	28837027	Endometriosis doesn't cause large changes in the endometrial expression of PGR, HBEGF, ITGAV, ITGB3 and SPP1 during the IW
SNP	2661, 268, 269	GDF-9, AMH, AMHR2	28831646	We demonstrate that an SNP in the AMH gene is associated with infertility in endometriosis, whereas several SNPs in the GDF-9 gene and the - 482A G SNP in the AMHR2 gene were found to be unrelated
expression analysis	3569	IL-6	28779573	Disorders involving IL-6 and IL-6R are correlated with the etiology of endometriosis. An increase in sIL-6R in peritoneal fluid promotes the development of endometriosis by enhancing the bioactivity of IL-6
expression analysis	7040	TGFB1	28760197	TGF-beta1 may act to promote the initiation of endometriosis by enhancing integrin-mediated cell-cell adhesion
expression analysis	5054	PAI-1	28758928	In general, an increased expression of PAI-1 in the blood is associated with an increased risk for infertility and a worse pregnancy outcome. GDM and PCOS are related to the genetic role of the 4G/5G polymorphism of PAI-1. This review provides an overview of the current knowledge of the role of PAI-1 in reproductive diseases. PAI-1 represents a promising monitoring biomarker for reproductive dise…
expression analysis	2146	EZH2	28754964	EZH2 as a novel driver of EMT in endometriosis, implicates the link between wound healing and epigenetic changes in the context of endometriosis, and underscore the role of platelets in the development of endometriosis
expression analysis	5743	PTGS2	28734688	we hypothesize that lower transcript levels of PTGS2 in cumulus cells may be involved in the impairment of oocyte quality, suggesting a possible mechanism involved in disease-related infertility
expression analysis	1019	CDK4	28720098	The findings indicate that cyclin D1-CDK4 inhibitors may be promising candidates for the treatment of endometriosis. This is the first study to demonstrate the potential usefulness of arcyriaflavin A as a therapeutic agent for endometriosis. Further studies of the effects of cyclin D1-CDK4 inhibitors on endometriosis may provide useful information on pathogenesis and treatment
expression analysis	56603	CYP26B1	21659316	Endometriosis is characterized by a gene expression pattern suggesting a decrease in uptake and metabolism of RA. Because RA is integral in regulating key biological processes involved in cell survival, this alteration could partially explain the resistance to apoptosis found in endometriosis.
expression analysis	140828	LINC00261	28707780	LncRNA LINC00261 is capable of inhibiting cell growth and migration in endometriosis.
qRT-PCR	2358	LXA4R	28691579	Lipoxin A4 suppresses E2-induced EMT via ALXR-dependent manner in eutopic EECs, which reveals a novel biological effect of LXA4 in EM
expression analysis	3206	PROK1, HOXA10	20400074	Contrary to ESC from control women, in ESC obtained from women affected by endometriosis PROK1 and PR mRNA expression was not induced by 1-4 days of treatment with steroid hormones. Nevertheless, when ESC from both groups of women were differentiated to decidual phenotype, PROK1 mRNA was up-regulated and PR and HOXA10 mRNA were down-regulated to the same extent.
expression analysis	21937	TNFRp55	28676525	the deficiency of TNFRp55 promoted the establishment and development of endometriosis through an increase in the lesion size and high levels of estradiol which correlate with an increase in the MMP-2 activity. This is evidence of the possible association of the deregulation of the TNFRp55 expression and the survival of the endometriotic tissue in ectopic sites
expression analysis	8289, 3569	ARID1A, IL-6	28673661	Both substage classification and IL-6 expression status may be independent prognostic factors in stage I OCCC. Therefore, IL-6 molecular stratification may be crucial in optimizing therapeutic strategies for early stage OCCC to improve survival
expression analysis	5743	COX-2	28673205	elevated NGF levels were associated with deep dyspareunia in women with cul-de-sac/uterosacral endometriosis. This association may be mediated by increased nerve bundle density and by COX-2/PGE2 stimulation via Trk receptor. Nerve growth factor signaling may play an important role in endometriosis-associated sexual pain
expression analysis	8644	AKR1C3	28651148	DEHP induces AKR activity in the endometrium of endometriosis patients, and AKR1C3 might influence the development of endometriosis
PCR	5241, 1586, 1588	PGR, CYP17A1, CYP19A1	28627595	The combined analysis of the polymorphisms PGR-CYP17A1-CYP19A1 suggests a gene-gene interaction in the susceptibility to endometriosis. These results may contribute to the identification of biomarkers for the diagnosis and/or prognosis of the disease and of possible molecular targets for individualized treatments.
expression analysis	10413	YAP1	28608501	Treatment with a YAP1 inhibitor caused the regression of endometriotic lesions without affecting maternal fertility or the growth rate of offspring in the mouse model of endometriosis. Taken together, we identify hypoxia/LATS1/YAP1 as a novel pathway for the pathogenesis of endometriosis and demonstrate that targeting YAP1 might be an alternative approach to treat endometriosis
expression analysis	6935	ZEB1	28597474	This is the first observation of ZEB1 expression in epithelial cells of benign disease. The preferential expression of ZEB1 in epithelial cells of endometriotic lesions suggests that these cells may have, at least in part, a higher level of mesenchymal features possibly via ZEB1-driven epithelial-mesenchymal transition than normal endometria and that ZEB1 can be a potential indicator of invasiven…
expression analysis	5728	PTEN	28591952	Up-regulation of Livin expression and down-regulation of PTEN may be involved in the occurrence and development of ovary endometriosis cancerization
RT-qPCR	8560	DEGs	28584637	The identified DEGs may be involved in the pathogenesis of endometriosis and may be potential biomarkers in the eutopic endometrium.
expression analysis	2099	ESR1	28578502	The results of our study indicate that, though its expression is altered in endometrial and endometriotic tissue, ERalpha is not regulated by methylation of the promotor region in endometriosis. In contrast, three of the five endometrial cancer cell lines are methylated in the promotor region of ESR1
expression analysis	406991	MIR21	28558522	treatment with saponin extracts significantly decreased the expression of miR-21-5p in HESCs from patients with endometriosis. Inhibition of miR-21-5p effectively increased the apoptotic potential of HESCs. These findings suggest that saponin extract treatment may have therapeutic potential for endometriosis via modulation of specific miRNAs
qRT-PCR	93185	EWI-2	28544021	Our findings suggested that downregulation of EWI-2 may contribute to endometriosis physiopathology and potentiate EWI-2 as a valuable diagnostic biomarker and therapeutic target for endometriosis.CI - (c) 2017 Japan Society of Obstetrics and Gynecology
expression analysis	693120	MIR33B	28537685	MiR-33b can mediate cell apoptosis, alter VEGF and MMP-9 expression and affect proliferation and apoptosis of uterus endometrial cells, thus participating endometriosis formation
expression analysis	3811, 10288	KIR, LILRB2	28523429	In this review we focus on the possible role of polymorphism of KIR, LILRB and their ligands (HLA-C, HLA-G) in susceptibility to recurrent implantation failure, which could serve as diagnostic biomarkers of this disease.
RT-PCR	, 100302240, 100422864, 100500867, 574452, 100616500, 102465447, 100500891, 100616390, 724022, 406988	MIR1304, MIR544B, MIR3684, MIR494, MIR4683, MIR6747; MIR3935, MIR4427,MIR652, MIR205	28506024	The study provided a comprehensive understanding to the current knowledge in the field of miRNAs in endometriosis and the relationship between them and the endometrial receptivity. miRNAs could be used as diagnostic biomarkers and therapeutic agents for this disease. The combination of ultrasound and miRNAs detection could be a better choice for the diagnosis of infertility in the future.
expression analysis	4313, 4318	MMP2, MMP9	28488074	ATRA increases the in vitro migration capacity of the MSCs through stimulating the expression and activity of MMP-2/-9 and inhibiting caspase three enzyme activity
expression analysis	8289	ARID1A	28483516	We demonstrate that the down-regulation of ARID1A does not markedly alter global chromatin accessibility or DNA methylation but unexpectedly, we find strong increases in the active H3K27ac mark in promoter regions and decreases of H3K27ac at potential enhancers. Taken together, these data provide evidence that ARID1A mutation can be an early stage event in the oncogenic transformation of endometr…
expression analysis	7442	TRPV1	28478727	We provide the first evidence for the presence of non-neuronal TRPA1 receptor in the healthy human endometrium and confirm the expression of TRPV1 channels. Their upregulations in rectosigmoid deep infiltrating endometriosis lesions and correlations with pain intensity suggest potential roles in pathophysiological mechanisms of the disease
RT-PCR	28952	CCDC22	28470452	Our results suggest that the rs2294021 (CCDC22 gene) polymorphism could be associated with increased susceptibility to endometriosis in Brazilian women when the allele C is present. In order to clarify this result, further studies should be conducted on a larger population.
expression analysis	8289	ARID1A	28469404	We observed oxidative stress status by measuring the activity of the antioxidant enzyme manganese superoxide dismutase (MnSOD), malondialdehyde (MDA), and ARID1A gene expression in tissue samples from patients with endometriosis, EAOC, or non-endometriosis-associated ovarian cancer (non-EAOC).
expression analysis	4780	NRF2	28457937	These findings indicate that expression of the transcription factor NRF2 and its effector GCL are both profoundly deregulated in endometriotic lesions towards increased growth and fibrogenetic processes
expression analysis	26191	PTPN22	28444099	As associacoes observadas entre PTPN22 (C1858T) e o risco de endometriose sugerem que este polimorfismo pode ser um marcador de suscetibilidade para a endometriose
expression analysis	1844	DUSP2	28440564	Hypoxia-induced IL-6 production in endometriotic lesions is mediated via downregulation of DUSP2, which causes aberrant activation of STAT3 signaling pathway and helps the endometriotic cells survive under the ectopic environment
expression analysis	2150	PAR-2	28438620	The presence of endometriosis did not affect the expression of these oxidative stress markers or prognosis. High PAR-2 expression was observed in 20% (14/71) of the early International Federation of Gynecology and Obstetrics (FIGO) stage cases and 58% (14/24) of the advanced FIGO stage cases. High PAR-2 expression was significantly correlated with advanced FIGO stage and shorter overall survival.…
mutational analysis	672, 675	BRCA1, BRCA2	28432985	ENOCs were divided by cases with microsatellite instability (28%), with a distinct mismatch-repair mutation signature. Taken together, our work establishes the potency of the somatic genome, reflective of diverse DNA repair deficiencies, to stratify ovarian cancers into distinct biological strata within the major histotypes
qRT-PCR	406985	MIR200C	28411308	LNA-anti-miR-200c inhibited the miR-200c expression in the transfected cells compared with that in the control group. LNA-anti-miR-200c suppressed the expression of PTEN and E-cadherin independent of the presence of the chemotherapeutic drug 5-FU
SNP	3292	HSD17B1	28405865	Our genetic study demonstrated HSD17B1 937 G variant as a risk factor for infertility in women with stage I and II endometriosis in Polish Caucasian patients
expression analysis	7040	TGFB1	28397725	The data support the hypothesis that TGF-beta1 is involved in the pathogenesis of EMs through regulating VEGF expression. An additive effect of TGF-beta1 and hypoxia is taking place at the transcriptional level
expression analysis	6367, 6361	CCL22, CCL17	28383711	Our results showed that ESCs-Mo co-culture produced significantly higher levels of CCL22 and CCL17 than ESCs or Mo cultured alone, and that estradiol (E2) or progesterone (P) further promoted this upregulation, demonstrating stronger chemotaxis on Tregs. The co-culture of ESCs with Mo stimulated TGF-beta1 secretion by Tregs, which could be inhibited by anti-CCL22 or/and anti-CCL17 neutralizing an…
expression analysis	2591, 11226	GALNT3, GALNT6	28382414	Both GalNAc-T3 and GalNAc-T6 expression levels were downregulated in ectopic endometrium, which may increase the adhesion and invasion of endometrial cells and contribute to the development of EMS. Moreover, we found a strong correlation between the expression of GalNAc-T3 and GalNAc-T6 and different stages of EMS
expression analysis	8462	KLF11	28372535	We investigated the regulation of DRD2 by KLF11 in the established eutopic and ectopic endometrial cell lines as well as in an animal model of endometriosis. KLF11 binding and activation of the DRD2 promoter was conserved across species. Promoter activation was reflected in correspondingly increased gene expression in an endometrial cell line and in primary endometriotic cells.
expression analysis	650, 2624	BMP2, GATA2	28367417	In the present study, treatment with lovastatin increased expression of BMP2 and RUNX2 and induced BMP2 promoter demethylation. We also demonstrated that lovastatin treatment down-regulated GATA2 expression via inducing methylation. In addition, the results indicated that CD146 cell marker was decreased to 53% in response to lovastatin treatment compared to untreated group.
expression analysis	91	ALK4	28345488	The expression of ALK5 and ActRIIB in OMA was higher than in controls, whereas polyps had an increased expression of ALK5 mRNA. In conclusion, the present data showed for the first time the expression of myostatin in healthy endometrium and a higher expression in endometriosis and endometrial cancer, suggesting myostatin involvement in human endometrial physiology and related pathologies
expression analysis	5594	MAPK1	28333195	The results highlight the need for increased efforts to understand the functional role of these pathways in endometriosis pathogenesis, including the investigation of the biological effects of the genetic variants on downstream molecular processes in tissue relevant to endometriosis.
expression analysis	2526	SSEA1	28325116	Using rat model of endometriosis, ectopic endometrium showed significantly higher Oct4, and SSEA1, but similar Thy1 gene expression to that of control endometrium. This indicates increased transition from somatic to pluripotent cell states in ectopic endometrium which may play a role in endometriosis pathogenesis
expression analysis	27178	IL-37	28322860	The affected NFkappaB mRNA expression in endometriosis contributed the to exhibited increase of IL-37. The increased levels of IL-37 may dampen NFkappaB activation in endometriosis patients
expression analysis	3553	IL1B	28322132	Our data implicate enhanced expression of IL-1beta in women with endometriosis as a potential causal factor in their increased susceptibility of developing postsurgical adhesions. Thus, targeting inflammasome activation may be an effective strategy for the prevention of surgical adhesions in patients with endometriosis.
expression analysis	6387, 2247	CXCL12, FGF2	28285568	Decreased endometrial CXCL12 and FGF2 expression contribute to the impaired endometrial receptivity in women who smoke. Smoking is also associated with decreased rates of endometrial cancer and endometriosis; increased CXCL12 and FGF2 are implicated in both conditions. The changes in the expression of cytokines described here may explain the impact of smoking on all of these diseases. Tobacco has…
expression analysis	5732	EP2	28281561	We then tested TRPV1, EP2, and EP4 receptor antagonists: The EP2 antagonist was the most efficient analgesic, reducing primary hyperalgesia by 80% and secondary hyperalgesia by 40%. In this study we demonstrate reversible peripheral and central hyperalgesia in mice with induced endometriosis
mutational analysis	406913, 7046	MIR126, TGFBR1	28277133	These finding suggest that, for the first time, mir-126 rs4636297 and TGFbetaRI rs334348 polymorphisms may influence individual's susceptibility to endometriosis and its severity
SNP	627	BDNF	28277116	The results showed that BDNF(V66M) polymorphism is a loss-of-function polymorphism in the regulation of endometrial cells growth. Given the correlation between endometriosis and infertility, it is important to understand the role of BDNF in regulating endometrial cells proliferation and to develop new therapeutic strategies for the treatment of endometriosis-related infertility
expression analysis	5745	PFE	28264481	These data suggest that Pueraria flower is a potential anti-endometriotic agent for the inhibition of endometriotic cell adhesion, migration, and MMP expression.
expression analysis	3620	IDO1	28260094	IDO1 educated-macrophages may facilitate the survival of retrograde endometrial tissues, and be involved in the pathogenesis of endometriosis
expression analysis	4988	MOR	28256208	The presence of MOR in human endometrium and the dynamic changes during the menstrual cycle suggest a possible role for opioids in reproduction events related to the human endometrium or endometriosis
expression analysis	6361, 1233	CCL17, CCR4	28240436	Immunohistochemistry was performed on normal, eutopic endometrium and ectopic tissues to analyze CCL17 expression. Flow cytometry was applied to detect the expression of CCR4, IL-6, and the phosphorylation levels of NF-kappaB. Patients with endometriosis have higher levels of IL-6 in peritoneal fluid compared to the control.
mutational analysis	8289	ARID1A	28240000	Endometriosis is associated with an increased risk of developing epithelial ovarian cancer (EOC), mainly of endometrioid and clear cell subtypes. This might be by virtue of the high estrogen concentration with the disease, which leads to malignant proliferation of endometriotic cysts, or be due to mutations in the ARID1A gene and consequent loss of BAF250a expression
SNP	6928	HNF1B	28214017	As rs11651755 in HNF1B modified both the ovarian cancer risk and also the risk for endometriosis, HNF1B may be causally involved in the pathogenetic pathway leading from endometriosis to ovarian cancer
qRT-PCR	8190	MIA	28205459	Our study demonstrates the presence of SV1 receptor as a target for treatment with GHRH antagonist in endometriosis. Endometrial tissues respond to MIA-602 with inhibition of proliferation in vitro and in vivo. The use of MIA-602 could be an effective supplement to the treatment strategies in endometriosis.
expression analysis	4292, 5395, 5728	MLH1, PMS2, PTEN	28194593	lower pre-treatment CA125 levels (OR = 0.17, 95% CI = 0.02-1.32, p = 0.09) showed weaker associations. There were no significant differences in survival between patients with or without SEO tumors. More patients with SEO tumors compared to endometrioid ovarian carcinoma were deficient in MLH1, PMS2 and PTEN (p ndometriosis may not be the mechanism by which SEO cancers arise. Altered tumor oncopro…
expression analysis	22914, 9437, 3802	NKG2D, NKp46, KIR2DL1	28184445	Inhibition of TGF-beta1 signaling partially restored the aberrant expression of NKG2D, NKp46 and KIR2DL1, and partially restored the impaired NK cell cytotoxicity induced by activated platelets and their releasate. Large scale data: Not applicable. Limitations reasons for caution: This study is confined by the limitation of animal and in vitro experimentation and the lack of direct human data. Wi…
expression analysis	998, 29092	CDC42, LINC00339	28171565	our results suggest that SNPs increasing endometriosis risk in this region act through CDC42, but further functional studies are required to rule out inverse regulation of both LINC00339 and CDC42
expression analysis	3664	LPS	28138997	LPS-induced pelvic inflammation status enhanced the development of murine endometriosis-like lesions via NF-kappaB pathway
expression analysis	396	Rho GDP	28131909	Many genes were strongly down-regulated. 1,25(OH)2D3 treatment down-regulated several genetic pathways related to neuroangiogenesis, cellular motility, and invasion, including pathways for axonal guidance, Rho GDP signaling, and matrix metalloprotease inhibition. These findings support a role for vitamin D in the pathophysiology of endometriosis, and provide new targets for investigation into pos…
expression analysis	7157, 596	P53, Bcl-2	28125869	Endometriosis-associated tumors appear to be associated with overexpression of bcl2 and P53 and reduced expression of Estrogen receptor. These finding may help to diagnose tumoral transformation with a background of endometriosis.
expression analysis	3576	IL-8	28120482	IL-8 takes part in all processes during the development of the disease: adhesion, invasion, and implantation of ectopic tissue. Additionally, the chemokine plays a role in growth and maintenance of ectopic endometrial tissue directly affecting endometrial cell proliferation. IL-8 might also protect ectopic cells against death by apoptosis
expression analysis	6277	S100A6	28075439	Inhibition of S100A6 expression had a significant antiproliferative effect and reduced the migratory ability of eutopic endometrial stromal cells, and induced their apoptosis. In addition, inhibition of S100A6 expression suppressed betacatenin expression. These results suggested that inhibition of S100A6 may represent a promising novel approach for the targeted therapy of endometriosis.
expression analysis	3206, 1312	HOXA10, COMT	28074437	To summarize, significant differential methylation of HOXA10 and COMT promoter regions was found between the ectopic and eutopic endometrial tissues. This is the first study investigating the methylation of HOXA10 and COMT genes and their linkage to endometriosis in Chinese patients
expression analysis	5021	OTR	28049501	OTR expression in the JZ of women with endometriosis changes significantly, which may result in abnormal uterine contractile activity, reducing the endometriosis-related fertility and dysmenorrhea
expression analysis	9077, 656, 1545, 57623, 3481, 100073347, 1855, 53834, 1028	DIRAS3, BMP8B, CYP1B1, ZFAT, IGF2, MIMT1, DVL1, FGFRL1, or CDKN1C	26417259	We searched gene functions and their roles in particular biological processes or events, such as development and pathogenesis of endometriosis. From the genomic imprinting database, we picked 10 genes that were highly associated with female reproduction; prominent among them were paternally expressed genes (DIRAS3, BMP8B, CYP1B1, ZFAT, IGF2, MIMT1, or MIR296) and maternally expressed genes (DVL1,…
expression analysis	4313, 4318, 7076, 7042	MMP-2, MMP-9, TIMP-1, TGFB2	28030938	The obtained results did not reveal any statistical difference in endometrial expression of MMP-2, MMp-9, TIMP-1, and TGF-beta2 or serum progesterone level between women with endometriosis and without visible signs of this illness
genetic polymorphisms	1588, 2944, 2952, 2950	CYP19A1, GSTM1, GSTT1, GSTP1	28002584	GSTM1, GSTT1, and GSTP1 rs1695 polymorphisms did not affect the pathogenesis of endometriosis. In conclusion, our results suggested that CYP19A1 rs2899470 polymorphism is associated with risk for endometriosis in the Chinese population
expression analysis	93974	ATPIF1	27998856	IF1 expression, increases abnormally in malignant tumors of the female reproductive system and may serve as a marker for malignancies of the female reproductive system as well as a promising pharmacological target for cancer treatment
expression analysis	1576	CYP3A4	27995413	steroid hormones are able to regulate CYP3A4 mRNA expression, although the circulating levels of these hormones can only regulate control endometrium and not endometriosis tissues, probably because of dysregulated local steroid concentration in these latter samples
expression analysis	3586, 7040	IL-10 , TGFB1	27989857	Progressively, PLGA/anti-CTLA-4 had better suppressive activity to inhibited IL-10 and TGF-beta secreted by CD4+CD25+Treg cells which indicating that PLGA/anti-CTLA-4 suppressed cells proliferation and invasion through reduced IL-10 and TGF-beta production. Thus, PLGA/anti-CTLA-4 may be a potential strategy for endometriosis therapy
expression analysis	2358	LXA4R	27987338	LXA4 may inhibit the progression of endometriosis partly by lowering or raising the effect of IL-1beta, mediated via some inflammation-related proteins (e.g. vinculin) and immune response-related protein (e.g. IL-4) in vitro
expression analysis	3949, 4035	LDLR, LRP1	27986818	The study also showed that LDL-R gene expression in the endometrium of women with endometriosis was higher during the secretory phase of the menstrual cycle (P = 0.001). LRP-1 gene expression was increased during the secretory phase in the endometrium of women without the disease (P = 0.008
SNP	1586	CYP17	27981034	These findings suggest that variation in or around CYP17 may be associated with endometriosis development in the Iraqi women
expression analysis	6387	CXCL12	27959395	These results may facilitate the complete elucidation of the role of CXCL12 in endometriosis, and its underlying epigenetic mechanisms
expression analysis	2852	GPER	27939762	Protein levels of GPER and HIF-1alpha were higher in EuEM than in CoEM. Protein levels of HIF-1alpha but not HIF-1alpha mRNA levels increased concurrently with GPER after E2 and G1 treatment. Furthermore, expression and activity of VEGF and MMP9 increased under E2 and G1 stimulation.
mutational analysis	1555	P450	27920344	P450 (P450arom) expression in eutopic endometrial stromal cells (ESCs) of endometriosis by activin type I receptor-Smad pathway
PCR	574411	MIR451A	27920341	sera miR-451a levels positively correlated with endometriotic lesion content and are significantly greater compared to sera levels in women without visible signs or symptoms of endometriosis. MicroRNA-451a may serve as a serum diagnostic marker for endometriosis
expression analysis	3620	IDO1	27906184	the estrogen-IDO1-MRC2 axis participates in the differentiation and function of Treg and is involved in the development of endometriosis. Thus, blockage of IDO1 in the ectopic lesion, which does not influence physiological functions of estrogen, may be considered a potential therapy for endometriosis
expression analysis	3977	LIFR	27903796	Significant reduction in LIFR expression and the reduced activation of subsequent signaling strongly suggest a working model of how the implantation markers, LIF, may affect the endometrium of patients with adenomyo
expression analysis	2492, 3640, 2626	FSHRE, INSL3, GATA4	27882303	positive feedback loop occurred through FSHR and LHR-dependent induction of GATA4/6 in EEC, as in ovaries, enhancing the production of the steroidogenic cascade. This work highlights a novel pathophysiological mechanism with a broadly ovarian pattern of differentiation in half eutopic and all ectopic endometriosis
expression analysis	5460, 6665, 7291	OCT4, SOX15, TWIST1	27881125	A concordant expression of OCT4 and SOX15 in the same sample was observed in epithelial cells of the endometriotic tissue (71.7%). The expression of stemness-related factors was not associated with proliferative or secretory phase of the menstrual cycle in endometriosis patients but was found to be differentially expressed during the menstrual cycle in the control group.
expression analysis	8289	ARID1A	27873496	We classified O-CCCs according to ARID1A expression status. ARID1A-positive O-CCCs exhibited distinct immunohistochemical features from ARID1A-negative tumors, suggesting a different underlying molecular event during carcinogenesis
expression analysis	91	ALK4	27833918	Activin A promotes the secretion of estradiol from ESCs by increasing the expression of P450arom via the ALK4-Smad pathway. These findings indicate the ALK4-Smad pathway may promote ectopic lesion survival and development
expression analysis	4790	NFKB1	27831632	By decreasing NF-kappaB expression, angiogenesis, and cell proliferation DSF prevents the growth of endometriotic implants
expression analysis	8857	FCGBP	27817035	We identified CNVs previously associated with endometriosis, together with six suggestive novel loci possibly involved in this disease. The intergenic locus on chromosome 19q13.1 shows strong association with endometriosis and is under further functional investigation.
expression analysis	3551	IKKBETA	27542948	TNFalpha stimulates the activation of the IKKbeta complex, an important nodal point in multiple signalling pathways that influence gene transcription, proliferation and apoptosis. However, few data on the regulation of IKKbeta in endometriotic tissue are currently available
expression analysis	11009	IL-24	27624484	These results indicate that the abnormally low level of IL-24 in ESCs possibly induced by macrophages may lead to the enhancement of ESCs' proliferation and invasiveness and contribute to the development of endometriosis
expression analysis	407026, 2288	MIR29C, FKBP4	27778641	We demonstrate that miR-29c expression is increased in EuE of baboons and women with endometriosis, which might contribute to a compromised progesterone response by diminishing the levels of FKBP4. Resection of DIE is likely to reverse the progesterone resistance associated with endometriosis in women
expression analysis	898	CCNE1	27767100	Our findings suggest that gene copy-number gain and upregulation of CCNE1 occur in ovarian clear cell carcinoma and are associated with a worse clinical outcome, dictating the survival of early-stage patients, and that these molecular alterations are unique to clear cell carcinoma among different types of endometriosis-related ovarian neoplasms
expression analysis	1137	NACHR	27766701	Activation of nAChR might be a new candidate for treatment of endometriosis.
expression analysis	2697	Cx43	27760016	down-regulation of Cx43 expression in the junction zone might play an important role in pathogenesis of adenomyosis. Estradiol modulates gap junctions during adenomyosis
mutational analysis	5728	PTEN	27481051	Our results offer new insight into the role in which PTEN missense mutations contribute to the molecular mechanism and genotypic-phenotypic correlation of endometriosis, endometrial cancer, and ovarian cancer
expression analysis	5728	PTEN	27744455	PTEN inhibits the occurrence and development of endometriosis by regulating angiogenesis and the apoptosis and cell cycle of endometrial cells; therefore, we propose that the PTEN gene can be used to treat endometriosis
expression analysis	406973	MIR196A2	27741504	Our study thus uncovered a novel tumorigenesis pathway triggered by the cancer-related MIR196A2 risk allele during endometriosis development and progression. We suggest that anti-RNA polymerase I therapy may be efficacious for treating endometriosis and associated malignancies
expression analysis	6387	CXCL12	27729562	Our results indicate that a preferential recruitment of stem cells to endometriosis can explain how endometriosis outcompetes eutopic endometrium in recruiting the limited supply of circulating stem cells. The CXCL12/CXCR4 signaling axis is a potential target for the treatment of endometriosis and its associated disorders
expression analysis	8644	PGF2alpha	27726474	These results show for the first time that PGF2alpha exerts an angiogenic effect on ectopic stromal cells, inducing the secretion of major angiogenic factors via different F-prostanoid signaling pathways. This study suggests a new interpretation of the mechanism underlying endometriosis development involving PGF2alpha in endometriosis-associated angio-inflammatory changes
expression analysis	100126351, 406946	MIR939, MIR154	27709720	This result gives new insight into the effects of leuprolide acetate treatment. Further investigation using quantitative reverse transcriptase-polymerase chain reaction and immunohistochemistry will allow us to validate the results of this study and to explore new therapeutic targets and biomarkers of endometriosis.
expression analysis	1543	CYP1A1	27706624	this study showed that the m1 polymorphism is associated with endometriosis, and that W1/m1 and m1/m1 polymorphisms are more frequently observed in patients with infertility and severe endometriosis.
expression analysis	8289	ARID1A	27699033	Additionally, BAF250a expression status was not significantly correlated with progression-free and overall survival in patients with CCA. Although loss of BAF250a expression was associated with early tumorigenesis in endometriosis-related CCA, this alteration was not significantly correlated with chemosensitivity and prognoses of CCA. Further biomarker analyses, including BAF250a expression, are …
expression analysis	5743, 5733, 207	COX-2, PGE2-R, AKT	27695098	our study establishes the involvement of MMP-2 activity via COX-2-PGE2-pAKT axis in promoting angiogenesis during endometriosis progression.
expression analysis	2099	Eralpha	18579858	These findings offer new insight into the specific role of ERalpha and could eventually help in developing therapeutics for endometriosis
expression analysis	5091	PCB	27663891	In vivo, the PCB-treated EM mouse model confirmed that CB126 rather than CB153 increased the levels of both E2 and inflammatory factors in peritoneal fluid and promoted the development of endometriotic lesions. In all, CB126, but not CB153, triggered EM development by stimulating estrogen biosynthesis, inflammation and their interactions and that these effects were mediated by the AhR receptor.
meta analysis	4312	MMP-1	27659332	This systemic review and meta-analysis suggested that theMMP-1 -1607 1G/2G polymorphism might play an important role in the risk of endometriosis and adenomyosis. Further, more well-designed and large-scale studies regarding gene-gene and gene-environment interactions are needed in the future
expression analysis	406881, 406884,	MIRLET7A1, MIRLET7B	27655771	Circulating microRNAs (miRNAs) have been implicated as biomarkers for several diseases including endometriosis. Here, we use an miRNA array to investigate differential miRNA abundance in the serum of mice after induction of experimental endometriosis. let-7a-5p was decreased in the serum of mice with endometriosis. let-7b-5p, c-5p, and e-5p also showed a trend toward downregulation. Serum let-7 f…
expression analysis	3491	CYR61	27644084	the expression of Cyr61 may be indirectly related to the degree of dysmenorrhea and Cyr61 may be involved in the pathogenesis of adenomyosis.
expression analysis	4312	MMP-1	27620811	For MMP-1 -1607 1G>2G (rs1799750) polymorphism, significant associations were observed both in overall comparison and subgroup analyses based on the stage of endometriosis, ethnicity of each study population and method of genotyping under four genetic models
expression analysis	574506	MIR503	27619772	Our findings indicate that epigenetically repressed miR-503 in ECSCs is involved in the acquisition of endometriosis-specific cellular functions
expression analysis	5609	MEK	27619769	Our data revealed altered miRNA expression and activated MEK/ERK signalling in the eutopic endometrium in minimal or mild endometriosis. We showed that the miR-196a level is associated with reduced expression of PGR isoforms through MEK/ERK, suggesting that miR-196a and MEK/ERK are both potential biomarkers of endometriosis. These results provide a novel approach to target the mechanisms behind p…
expression analysis	406948	MIR15A	27608888	this newly identified miR-15a-5p module provides a new avenue to the understanding of the processes of endometriosis development, especially proliferation, motility as well as angiogenesis, and may facilitate the development of potential therapeutics against endometriosis
expression analysis	7124	TNF-alpha	27597876	KTC could inhibit the growth of ectopic endometrial tissue through upregulating the level of TNF-alpha and its downstream signaling, including caspases and cytochrome
expression analysis	84432	PROK1	19285664	An altered expression of PROK1 could be one of the several biochemical abnormalities characterizing eutopic endometrium in endometriosis
expression analysis	1029	p16	27572321	Malignant lesions showed markedly elevated stromal p16 expression compared with benign or borderline lesions. There were significant differences in stromal p16 expression between benign and borderline lesions (P < 0.001) and between borderline and malignant lesions (P < 0.001). These significances remained when analysis was performed based on lesion classification as serous, mucinous, and endomet…
expression analysis	1524	CX3CR1	27553970	The results revealed that the high levels of fractalkine in ectopic milieu promoted proliferation and invasion of ESCs through activating AKT and p38 signal pathways. Estradiol has a stimulating effect on the expression of fractalkine. The present results increase our understanding of the significance of fractalkine in the progression of endometriosis and shed some lights on the targeted fractalk…
RT-PCR	10016	PDCD6	27546697	Achieved results show that polymorphism rs3756712 is significantly associated with the risk of endometriosis development in Slovak women. Polymorphism rs4957014 did not show any connection with development of endometriosis
PCR	3565	IL-4	27536203	The results suggest that in patients with advanced stages of endometriosis there is a higher serum level of IL-4, and that this value, or the presence of the disease, is not influenced by the presence of IL-4 -590C/T genetic polymorphism
expression analysis	6714	SRC	27526105	These data suggest that targeting active Src signaling could be a novel therapeutic opportunity for EAOCs, and support the further pre-clinical investigation of Src family kinase inhibitors for treating OCs expressing Src-pY416
meta analysis	2944, 1543	GSTM1, CYP1A1	27525656	This meta-analysis suggested that CYP1A1 Ile462Val polymorphism was associated with an increased risk of endometriosis, particularly in Asians. CYP1A1 MspI polymorphism may not be associated with endometriosis risk, but GSTM1 and CYP1A1 MspI polymorphism may have a joint effect on endometriosis risk.
expression analysis	4915, 7133	TRKB, p75	27519317	While the neurotrophin BDNF is equally present in PE and DIE, its receptors TrkB and p75 are more highly expressed in DIE and may have a potential role in the pathophysiology of DIE, especially in promotion of cell growth. BDNF has a stronger binding affinity than NGF to the p75 receptor, likely inducing sympathetic nerve axonal pruning in DIE, resulting in the lower nerve fiber density seen
expression analysis	3164	NR4A1	27515096	Identification of a positive agonist of NR4A receptors will be critical for the improved treatment of patients with conditions of insufficient decidualization-associated infertility, such as adenomyosis and endometriosis
expression analysis	3576, 3592	IL-8, IL-12A	27491770	The levels of IL-8, IL-12, and adrenomedullin may be good indicators of embryo and oocyte quality in endometriosis patients undergoing IVF. Further studies are necessary to ascertain the potential of these markers for oocyte and embryo developmental competence which may help improve the chances of a successful IVF in endometriosis patients
expression analysis	7071	KLF10	27488034	Mechanistically, KLF10 regulated CD40/CD154-mediated immune pathways. Both inflammatory as well as fibrotic phenotypes are the commonest clinical manifestations in chronic fibro-inflammatory diseases such as endometriosis
PCR	3603	IL-16	27484651	IL-16 gene polymorphisms are highly associated with increased risk of endometriosis and could be considered as a susceptibility factor for endometriosis
PCR	2516	NR5A1	27463801	mutations in the NR5A1 gene, which encodes the steroidogenic factor 1 (SF1), are responsible for different phenotypes of disorders of sex development (DSD), such as bilateral anorchia and hypospadias. Furthermore, they can be associated with primary amenorrhea, premature ovarian failure, male infertility, adrenal tumors, and endometriosis
expression analysis	3569, 3576, 6347	IL-6, IL-8, MCP-1	27444775	The gene expression and protein secretion of IL-8 in endometriotic stromal cells after incubation with lignocaine 0.1 mg/mL were significantly decreased after 24 hours compared to the controls ( P = .028 and P = .018). Macrophages from healthy controls had a significant lower gene expression of all tested cytokines ( P = .043) after treatment with lignocaine, but there were no significant differe…
expression analysis	6401	ELAM-1	27433816	ELAM-1 upregulation may promote disorder in adhesion, and migration of the cells leading to the endometriosis disorder
expression analysis	2328, 3205	FMO3, HOXA9	27424973	FMO3 gene transcription and protein expression were higher in oviduct cells while HOXA9 gene transcription and protein expression were higher in endometrial cells. In 89 cases the endometriosis cells were derived from oviduct epithelial and in 113 cases endometriosis cells were derived from the endometrium. Protein levels indicated that endometriosis cells in 85 cases were derived from oviduct ep…
expression analysis	406992	MIR210	27412773	Although there is no direct evidence, we speculate that the loss of miR-30a-5p-mediated mechanisms of decidualization and the acquisition of miR-210-mediated mechanisms of decidualization may be involved in the progesterone resistance in endometriosis. Further investigations are necessary to test this speculation.
expression analysis	4851	Notch1	27389878	These data provide evidence that specific inhibition of Notch1 alters endometriotic tissue growth and progression, and may represent a promising potential therapeutic avenue
expression analysis	3398	ID2	27385728	Novel therapeutics that target the TGFbeta/ID pathway offer a potential role in the treatment of endometriosis
RT-PCR	472, 186	AT1, AT2	27384958	Renin-angiotensin system may play an important role in the pathophysiology of endometriosis.
expression analysis	8462	KLF11	27384304	In contrast to KLF11, TGFbeta1 treatment caused transient repression and sustained activation of CYP3A4 expression. CYP3A4 increased endometrial cell proliferation and was also increased in human endometriosis lesions compared with eutopic endometrium
meta analysis	2099	ESR1	27373811	This meta-analysis indicated that the PvuII and XbaI polymorphisms were not associated with the risk of endometriosis, whereas stage classification of endometriosis was likely to influence the association of PvuII polymorphism. The (TA)n polymorphisms might play roles in the susceptibility to, or protection against, the pathogenesis of endometriosis
expression analysis	406934, 406938	miR-142-5p, miR-146a-5p	27356479	There are multiple differential expressions of miRNA in the implantation window phase endometrium tissues of endometriosis infertility patients, among which miR-142-5p and miR-146a-5p show significantly enhanced expression and may affect embryo implantation by acting on a variety of endometrial receptivity marker molecules. The expression of miR- 543 in implantation window phase endometrium of en…
PCR	2944, 2950	GSTM1, GSTP1	27351025	GSTM1 and GSTP1 polymorphisms may be associated with susceptibility of endometriosis in Iranian women.
expression analysis	4183	MCs	27348627	These results suggest a new mechanistic role of MCs in the pathogenesis of endometriosis
expression analysis	5054	PAI-1	27347347	our results demonstrate that both Smad-dependent and TBR1-dependent ERK1/2 pathways are necessary for TGF-beta-dependent high level secretion of PAI-1, which might increase cellular deadhesion.
PCR	2099	ERalpha	17121748	We concluded that ERalpha-351 XbaI*G- and -397 PvuII*C-related genotypes/alleles were correlated with higher susceptibilities of endometriosis or leiomyoma, which might be associated with related pathogeneses
expression analysis	26060	APPL1	27342590	Estrogen imbalance leads to various pathological conditions in premenopausal women, such as endometriosis, breast cancer, colorectal cancer, prostate cancer, poly cysts, intrahepatic cholestasis of pregnancy, osteoporosis, cardiovascular diseases, obesity, etc. In this review, we discuss common drug targets and therapeutic strategies, including acupuncture and compounds of natural origin, for the…
expression analysis	3569, 7124	IL-6, TNF-alpha	27337799	IL-6, TNF-alpha expressions of follicular fluid were higher in affected side of ovarian endometriosis patients than those in the unaffected side and those in control group.
expression analysis	7033	TFF3	27330011	This study provides the first evidence that TFF3 is locally elevated in the peritoneal cavity in endometriosis and might play a role in disease pathogenesis and its associated inflammatory processes. Furthermore, the results show that TFF3 is regulated through the menstrual cycle. With respect to animal models, syngeneic mouse model does reflect local TFF3 upregulation in the peritoneal cavity af…
expression analysis	81607	Nectin-4	27328518	Nectin-4 expression, when compared with control group, was higher in endometriotic lesions of patients having ovarian endometriosis and peritoneal endometriosis (p = 0.003 and p = 0.009, respectively). This difference was significant in the endometrium of patients having endometriosis (p = 0.011).
expression analysis	406984, 406948, 406980, 406938, 406985 , 51573, 406900, 406937	MIR200B,MIR15A, MIR19B1, MIR146A, MIR200C, MIR16, MIR106B, MIR145	27323121	differences in the miRNA levels could modulate the expression of VEGFA, EGFR2, PTEN, and CXCR4, and may play an important role in the pathogenesis of endometriosis. The higher angiogenic and proteolytic activities observed in the eutopic endometrium might facilitate the implantation of endometrial cells at ectopic sites
expression analysis	6781	STC1	27322879	STC1 protein is significantly up-regulated in MSE endometrial fluid and is dysregulated in eutopic endometrial tissue from women with endometriosis
expression analysis	406888	MIRLET7F1	27320036	AI treatment significantly increased expression of let-7f in Ishikawa cells and HESCs from patients with endometriosis; increased let-7f expression effectively reduced the migration of endometrial cells. Modulation of microRNAs involved in the pathogenesis of endometriosis may have therapeutic potential for endometriosis.
Polymorphism	2099	Eralpha	16500359	In conclusion, women affected by endometriosis with the ERalpha polymorphic allele, even if heterozygous, have a worse prognosis, and these results suggest that the ERalpha gene polymorphisms may be included among the genetic risk factors for endometriosis
expression analysis	2100	ERbeta	27272520	Recent studies highlighted in this focused review linked ERbeta to dysregulation of apoptotic and inflammatory networks involving novel interacting partners in endometriosis. The elucidation of these nongenomic actions of ERbeta using human cells and mouse models is an important step in understanding key regulatory pathways that are disrupted leading to disease establishment and progression
RT-PCR	4988	MOR	27252115	our results suggested that EM-1 may be involved in the pathogenesis of the endometriosis-associated infertility by regulating hypothalamus-pituitary-ovarian axis, and Naloxone may be a new alternative drug for the treatment of endometriosis.
SNP	6775	STAT4	27235632	Our results for the first time showed a significant association between rs7582694 alleles and genotypes and susceptibility to endometriosis in a population
expression analysis	6774, 10401	STAT3, PIAS3	27226311	These results suggest that attenuation of PIAS3 causes aberrant activation of STAT3 in endometriosis, leading to inflammatory changes that may impair fertility or cause pain
expression analysis	2492	FSHR	27224263	We described a novel functional FSHR expression, where FSH-stimulated CYP19A1 expression and estrogen production in RVEN are demonstrated. This locally FSH-induced estrogen production may contribute to the pathology, development, progression, and severity of RVEN
expression analysis	1629, 3569	E2, IL-6-	27222233	E2-induced PRL-3 expression in ESCs from ectopic endometrium was significantly blocked by IL-6 antibody. Moreover, E2- and IL-6-enhanced cell migration was completely abrogated by Sov treatment
expression analysis	604	BCL6	27222232	These data suggest that BCL6 is a promising candidate as a single diagnostic biomarker for detection of endometriosis in women with otherwise UI and may be associated with endometrial dysfunction, including progesterone resistance
expression analysis	4904	YB-1	27217374	targeting YB-1 via OSU-03012 showed a potent antiproliferative effect on endometriotic epithelial cells in vitro and in a mouse model of disease
expression analysis	406911	MIR125B1	27179784	We identified several miRNAs in serum that distinguished subjects with endometriosis from those without. miR-125b-5p had the greatest potential as a single diagnostic biomarker. A combination of that miRNA with miR-451a and miR-3613-5p further improved diagnostic performance
meta analysis	1128, 9173	M1, T1	27168783	The results suggest that the GSTM1, GSTT1, and combined GSTM1/GSTT1 null genotypes increase susceptibility to endometriosis. Additional well-designed studies and precise analyses are warranted to confirm these findings
expression analysis	1588	CYP19A1	27167072	These epigenetic changes along with differential binding of ERbeta (as a transcription factor) in CYP19A1 promoters may impair follicular steroidogenesis, leading to poor Oocyte and embryo condition in endometriosis patients
expression analysis	1906	ET1	27161651	The results presented here reveal that preconditioning of MSCs with ET-1 has strong cytoprotective effects through activation of survival signalling molecules and trophic factors
expression analysis	5743	COX-2	27132422	These findings suggest that the -1195 A/G on the promoter region of COX-2 gene may increase the risk of pain occurrence in EM women, possibly by affecting the rate of gene expression, especially in patients with the pain phenotype
expression analysis	22914	NKG2D	27130956	NKG2D is known to potently activate NK cells, so potent that it even overrides inhibitory signals transduced by other inhibitory receptors. This is the first time we demonstrate that platelet-derived TGF-beta1 may be responsible for reduced NKG2D expression as well as reduced cytotoxicity of NK cells in women with endometriosis
expression analysis	3611	ILK	27130230	Additionally, silencing of the ILK gene in EcSCs also achieved the above-mentioned effects, which were strengthened by emodin. Furthermore, exogenous expression of ILK in control ESCs (CSCs) resulted in the EMT and increased abilities of migration and invasion of CSCs, which can be abrogated by emodin. Besides, exogenous expression of ILK also abrogated the effects of emodin on CSCs
expression analysis	4891	DMT1	27117373	Divalent metal transporter-1 overexpression in endometriosis patients' endometrium can increase iron influx to endometrial cells, inducing oxidative stress-mediated proinflammatory signaling. In turn, endometriosis-related conditions, as iron overload and inflammation (IL-1beta), enhance endometriosis patients endometrial DMT1 expression, creating a vicious circle on DMT-1-modulated pathways.
expression analysis	3292	HSD17B1	27102893	In humans, the enzyme is expressed in placenta, ovary, endometrium and breast. The high activity of estrogen activation provides the basis of 17beta-HSD1's implication in estrogen-dependent diseases, such as breast cancer, endometriosis and non-small cell lung carcinomas
expression analysis	3091	HIF-1alpha	27094478	Overexpression of HIF-1alpha and changes associated with EMT were observed in normal, eutopic and ectopic endometrial tissues. Primary cultured human endometrial epithelial cells responded to hypoxia with classic EMT changes (fibroblastoid phenotype, increased expression of snail family zinc finger 1, beta-catenin and mesenchymal markers, and decreased expression of E-cadherin) and increased inva…
expression analysis	4988	MOR	27089914	MOR immunoreactivity was significantly decreased in the ventral PAG in the endometriosis group. Endometriosis reduced by 20% the number of neuronal profiles expressing MOR and reduced by 40% the NR1 profiles. Our results suggest that endometriosis is associated with subtle variations in opioidergic and glutamatergic activity within the PAG, which may have implications for pain processing
expression analysis	3702	EMT	27076446	These results, taken together, provide support for the notion that ReTIAR occurs in the endometriotic lesions, resulting in EMT and FMT, leading to SMM and ultimately fibrosis as lesions progress. Consequently, our data also provide corroborative evidence that platelets drive the EMT and FMT in endometriotic lesions over time, promoting SMM and resulting ultimately in fibrosis in the endometrioti…
expression analysis	26060	APPL1	27075719	Reduction of APPL1, insulin receptor and adiponectin system genes in GCs could be involved in the development of PCOS
expression analysis	5394	P4	27075616	These findings substantiate eMSC as progenitors of eSF and reveal eSF in endometriosis
RT-PCR	279	PA	27071481	These data indicate for the first time that MMT is involved in PA pathogenesis. This finding opens new therapeutic strategies to interfere with adhesion formation by modulating MMT with a wide range of pharmacological agents
expression analysis	23028	LSD1	27062244	In light of our previously reported reduced cellular proliferation, cell cycle progression and invasiveness resulting from the LSD1 inhibition in in vitro studies, our data strongly suggest that LSD1 is a promising therapeutic target for endometriosis
expression analysis	100048912	ANRIL	27055116	Our work illuminates the allelic imbalances in a series of transcriptional regulation from factor binding to gene expression mediated by chromatin interaction underlie the molecular mechanism of 9p21 endometriosis risk locus
expression analysis	8289	BAF250a	27051059	BAF250a loss in AE is consistently associated with the development of BAF250a-negative endometriosis-associated cancers and appears to be an early event in most of these cases. This research provides additional evidence that in the absence of cancer, BAF250a expression should be evaluated as a biomarker of cancer risk in patients diagnosed with AE
expression analysis	1666	NADPH	27049074	The results showed an increase in ROS levels and NOX 1 gene and protein expression in the endometriotic tissues compared to the normal surrounding tissue control. Also, mTOR and fibronectin, gene expression was found to be increased. Up regulation of NOX at gene and protein level leads to increased production of ROS in the endometriotic tissue, which in turn causes proliferation of the ectopic ti…
mutational analysis	5728	PTEN	27048117	The present study suggested that the mutation and functional incapacitation of certain tumor-related genes may be involved in malignant transformation of endometriosis. PTEN mutation is the pristine event, but p53 mutation is the late
expression analysis	2100, 4915	Erbeta, TRKB	27048022	ERbeta expressed in cytoplasm may mediate pathogenesis of EMs
expression analysis	6385	SDC4	27041028	The upregulation of syndecan-4 in the eutopic endometrium of endometriosis patients may facilitate the pathogenetic process by promoting invasive cell growth via Rac1, MMP3, and ATF-2
expression analysis	5743, 4313, 4318	COX-2, MMP-2, MMP-9	27038655	our results show that HCB exposure could contribute to endometriosis development, affecting inflammation and invasion parameters of human endometrial cells
expression analysis	1735	D3	27035829	VD modulates inflammation and proliferation in endometriotic cells, and a lower VD status is associated with endometriosis. Taken together, VD supplementation could be a novel therapeutic strategy for managing endometriosis.
expression analysis	3611	ILK	27034956	After silencing the expression of ILK in EECs, levels of p-Akt, slug, Zeb1, N-cadherin, and vimentin were downregulated while E-cadherin and keratin were upregulated. Although periostin weakened the above effects in EECs after silencing the expression of ILK, it failed to induce the EMT of EECs. Thus, periostin enhanced invasion and migration abilities of EECs and facilitated the EMT of EECs thro…
expression analysis	999	CDH1	27023436	The results implied that the aberrant methylation of the CDH1 promoter region in the endometrium of the women may contribute, at least in part, to the development of ovarian endometriosis.
expression analysis	960	CD44	27018976	The present study demonstrates for the first time that targeting the synthesis of HA suppresses angiogenesis in developing endometriotic lesions. Further studies have to clarify now whether in the future this anti-angiogenic effect can be used beneficially for the treatment of endometriosis
expression analysis	7536	SF1	27018534	The present results indicate that SF1 directly contributes to the abnormal uterine gland morphogenesis, an inhibition of steroid hormone signaling and activation of an immune response, in addition to previously postulated estrogen production
expression analysis	1543, 1545	CYP1A1, CYP1B1	27012269	HPLC-MS-MS) in ovarian endometriotic stromal cells compared with paired eutopic stromal endometrial cells. Our results indicate that there is a site-dependent regulation of CYP1A1 and CYP1B1 in ovarian/peritoneal lesions and ovarian endometriotic stromal cells, whereas a slower metabolism is taking place in these cells.
expression analysis	7040, 7471	TGF-beta1, Wnt1.	27005891	Our results demonstrated that Ecto-MSC CM significantly promoted cell proliferation, migration, invasion and collagen gel contraction of Euto- and Ecto-ESCs from patients with ovarian endometrioma compared with control and Euto-MSC CM. expression levels of fibrotic markers in Euto- and Ecto-ESCs were dramatically elevated after treatment with Ecto-MSC CM. Ecto-MSCs secreted higher levels of TGF-b…
expression analysis	55591	VEZT	27005890	By examining women who possess an enhanced genetic risk of developing endometriosis, we have identified an effect on ITALIC! VEZT expression and therefore a potential gene/gene pathway in endometriosis disease establishment and development
expression analysis	4790	NFKB1	27004203	The expression of NF-kappaB p65 is increased in the eutopic endometrium and adenomyosis nodule of women with adenomyosis, which strongly suggest that NF-kappaB plays a critical role in the pathogenesis and/or pathophysiology of adenomyosis
expression analysis	7040	TGFbeta1	26992563	Consequently, endometriotic lesions and their microenvironment contain all the necessary molecular machinery to promote SMM and fibrogenesis. Our results suggest that endometriotic lesions are wounds that undergo repeated injury and healing, highlighting the importance of platelets in the development of endometriosis.
expression analysis	10413	YAP	26977530	Our study suggests that the Hippo/YAP-signaling pathway plays a critical role in the pathogenesis of endometriosis and should present a novel therapeutic method against endometriosis
expression analysis	1182	ClC-3	26965430	The expression of ClC-3 mRNA and proteins was significantly up-regulated in the ectopic tissues from endometriotic patients, while that in the eutopic endometrial tissues of the same patients did not significantly differ from that in non-endometriotic patients. The migration and invasion ability and MMP-9 expression was increased in the ESCs from ectopic endometrial tissues.
expression analysis	5806	PTX3	26965297	We conclude that serum PTX3 levels could be used as a potential diagnostic marker for MCTs, especially helpful in differentiating them from endometriomas with elevated expression of CA19-9
expression analysis	6927, 8289, 5290	HNF-1beta, AIRD1A, PIK3CA	26945423	PIK3CA expression had no impact on survival. For univariate and multivariate analyses, only HNF-1beta expression seemed to be a prognostic factor for favorable OS (P = 0.04). The loss of ARID1A was correlated with late-stage and endometriosis-associated tumors. The measurement of ARID1A expression might be a method to predict the risk of recurrence. Among the 3 biomarkers, only high-level HNF-1be…
expression analysis	1277	COL1A1	26935598	Aberrant lesional COL1A1 regulation is significant because fibrosis depended on lesion rather than host genotype. This is the first report demonstrating feasibility for targeted pharmacological reversal of fibrosis, an intractable phenotype of diverse chronic diseases.
mutational analysis	207, 2475, 4851	AKT, mTOR, Notch	26920370	Molecular characterization of endometriosis-associated ovarian cancer genes by targeted NGS. Candidate genes predictive of malignant transformation were identified. Chromatin remodeling, PI3K-AKT-mTOR, Notch signaling, and Wnt/beta-catenin pathway may promote cell malignant transformation
expression analysis	3732, 3814	KAI1, KISS1	26918694	KAI1 and KISS1 are implicated in the pathogenesis and maintenance of endometriosis. Future studies should investigate whether KAI1 and KISS1 could be used as markers for early and minimally invasive detection of endometriosis based on their differential protein expression pattern in the eutopic endometrium of patients with and without endometriosis.
expression analysis	4318	MMP-9	26917263	Our results indicate that 17beta-E2-induced HESC invasion is dependent on c-fos-mediated MMP-9 expression. These findings facilitate our understanding on the pathogenesis of endometriosis and may provide data potentially useful for the development of new treatment modalities for better management of endometriosis.
expression analysis	90993	CREB3L1	26917262	It is known that hESCs from patients with endometriosis show impaired decidualization and that dysregulation of the P4-PR signaling axis is linked to a variety of endometrial diseases including infertility and endometriosis. Therefore, these results suggest that CREB3L1 is required for decidualization in mice and humans and may be linked to the pathogenesis of endometriosis in a P4-dependent mann…
expression analysis	80312	TET1	26917261	The expression of TET1, TET2, and TET3 was decreased in endometriosis compared to non-endometriosis control eutopic endometrium. Surprisingly, the global amount of 5-hmC was higher in ectopic endometrium than control eutopic endometrium, while genomic DNA from blood of women with endometriosis contained statistically significantly less 5-hmC than women without endometriosis. expression of TET1, T…
expression analysis	406992	miR-210	26914112	The hypoxia-induced higher miR-210 expression may contribute to pathological development of endometriosis at least through enhancing cell survival and promoting autophagy via Bcl2/Beclin-1 axis
expression analysis	2100	ERbeta	26899323	In conclusion, this is the first report to describe a mechanistic analysis of ERbeta and aromatase expression regulated by IGF-I in ESCs. Moreover, an IGF1R inhibitor impeded ectopic lesion growth in nude mice. These findings suggest that an inhibitor of IGF1R might have therapeutic potential as an antiendometriotic drug. KEY MESSAGES: Level of IGF-I mRNA in ESCs is markedly higher than that in E…
expression analysis	3091	HIF-1alpha	26898675	In this brief review, we had a general understanding of HIF-1alpha firstly, and then we tried to sum up the collective knowledge of HIF-1alpha in endometriosis. Finally, we will discuss kinds of novel therapeutic approaches to endometriosis based on the functions of HIF-1alpha.CI
meta analysis	1588	CYP19	26897397	Present meta-analysis reveals that CYP19 rs10046 polymorphism may be not correlated to endometriosis risk
expression analysis	2625	GATA-3	26890586	In summary, GATA-3 was induced by estrogen and may promote the occurrence and development of EM by regulating the secretion of cytokines in the eutopic endometrial cells of EM patients
expression analysis	4318	MMP9	26888969	MMP9 and beta-catenin increased concurrently in a time- and dose-dependent manner after E2 treatment. To clarify the relationship between MMP9 and beta-catenin, we performed luciferase promoter reporter and chromatin immunoprecipitation assays. A beta-catenin/TCF3/LEF1 complex bound to a specific site on the MMP9 promoter that promoted MMP9 gene and protein expression. The promotion of MMP9 by th…
expression analysis	3958	Gal-3	26886939	Our results suggest that aberrant expression of Gal-3 might contribute to infertility in patients with endometriosis due to progesterone resistance
PCR	Not_found	PROGINS	17522428	This indicates that PROGINS can be considered as a predisposing risk marker for breast cancer but not for endometriosis and uterine fibroids
expression analysis	3146	HMGB-1	26872033	Treatment with a TLR4 antagonist and an NF-kappaB inhibitor resulted in suppression of rHMGB-1-induced HESC proliferation (P<0.05). Levels of IL-6 were significantly decreased following treatment with an NF-kappaB inhibitor (P<0.05). Our results support the development of altered, pathological endometrium resulted from oxidative stress in normal endometrium. These findings may provide important i…
expression analysis	3206	HOXA10	26865543	In the endometrium of uteri with polyps, submucosal myomas, and intramural myomas, there were CpG sites within the HOXA10 gene that were highly methylated compared to controls. The HOXA10 gene in women with endometriosis was hypomethylated compared to controls. DNA methylation may be a common molecular mechanism that results in reproductive dysfunction seen in gynecologic disease.
expression analysis	23411	SIRT1	26862948	The expression of SIRT1 on OvCa did not correlate with age, stage, location of metastasis, or capsular penetration. However, elevated SIRT1 expression was a significant predictor of shorter survival in univariate (P=0.038) and multivariate (P=0.037) survival analyses, regardless of the tumor stage. Results of the present study suggest a positive role for SIRT1 in the development of OvCa and its p…
expression analysis	406982	miR-20	26854065	In conclusion, up-regulation of miR-200b reverts EMT, emerging as a potential therapeutic approach to inhibit endometriotic cell motility and invasiveness
expression analysis	1499	CTNNB1	26853489	In addition, we observed a significant increase of nuclear beta-catenin in endometriotic lesions, a hallmark of Wnt/ beta-catenin pathway activation. Stromal beta-catenin staining was found in 45.4% of endometrial tissues and 77.8% of endometriotic lesions. beta-catenin nuclear localization was found in 18.2% of the endometrial tissues and 33.3% of endometriotic lesions. Finally, the expression o…
expression analysis	55272	IMP3	26837693	The present study demonstrates that IMP3 expression is a prognostic marker, with the exception of stage. IMP3 represents a biomarker of unfavorable prognosis even in stage I patients
expression analysis	8289	BAF250a	26832958	The occurrence of partial loss of BAF250a protein expression in women with rectovaginal DIE and endometriosis affecting the PSLN is described for the first time. The value of this finding as a predictor of malignant transformation in endometriosis must still be clarified and further studied in association with other molecular events, such as PTEN (phosphatase and tensin homolog) deletion and PIK3…
expression analysis	596	Bcl2	26828978	Moreover, it also inhibits the mRNA levels of Survivin gene and Bcl-2 (B-cell lymphoma 2) in qPCR and Western blot analysis together with increases the mRNA level of apoptosis promoting factor Bax. These results clearly suggest that, HK was proficient to provoke apoptosis of rat endometriotic cells
expression analysis	6446	SGK1	26827666	ERbeta leads to SGK1 overexpression in endometriosis, which contributes to the survival of endometriotic lesions through inhibition of apoptosis
expression analysis	407040	MIR34A	26819477	An inhibitor of miR-34a-5p also reduced the synthetic steroid hormones effects on cell proliferation. In vivo data revealed that miRNA levels in endometriotic lesions correlated with findings following in vitro synthetic hormone treatment. Our data show the effects of synthetic steroid hormones on miRNA regulation. These findings contribute to our understanding of the molecular impact of the synt…
expression analysis	3553	IL-1beta	26817396	In endometriosis endometrial cells cultures the IL-1beta stimulates the production of IL-6 and IL-8, increasing the cell proliferation and reducing the apoptosis and Bax expression in these cells. According to these remarks, this work aims to evaluate the inflammatory effects in vitro, but more next to what happens in a woman's body, associating endometrial cells with stem cells, thus mimicking t…
expression analysis	2358	LXA4R	26779118	the combination of E2 and LXA4 resulted in a reduced number of regulated proteins, with LXA4 mediating a suppressive effect on E2-mediated signaling. These proteins are involved in diverse pathways of relevance to endometriosis pathology and metabolism, including mRNA translation, growth, proliferation, proteolysis, and immune responses. In summary, this study sheds light on novel pathways involv…
SNPs	5228	PLGF	26773192	A significant association was found between the rs2268613 polymorphism in the PLGF gene and PLGF plasma levels. In all study subjects, women with the AA variant of the rs2268613 PLGF gene had significantly lower PLGF plasma levels (median [interquartile range] 9.36 [8.19-10.43] pg/mL) than those with the AG variant (12.1 [11.81-20.84] pg/mL; P(a)=.0085, P(b)=.04), both before and after multiple t…
expression analysis	55553	SOX6	26770366	MiR-202 was up-regulated in the endometriosis. Through targeting SOX6 and its downstream proteins (p21, cyclin D1 and pRb), miR-202 can promote the progression of endometriosis
expression analysis	8842, 9429	CD133, ABCG2	26753483	Aberrant expression of CD133 and ABCG2 in eutopic and ectopic endometrial tissue with endometriosis suggests that they are probably associated with the pathogenesis of endometriosis and stem cells play a possible role in its development
expression analysis	3934	LCN2	26729415	the expression of xCT, a cystine transporter protein, and CD44 variant 8-10 (CD44v), a stem cell marker, was up-regulated by LCN2. Although LCN2 increased intracellular iron concentrations, LCN2-induced GSH may catalyze and override oxidative stress via CD44v and xCT, and subsequently enhance the survival of CCC cells in oxidative stress-rich endometriosis
expression analysis	412, 6783	STS, SULT1E1	26723541	a greater expression of STS was observed in stromal cells from eutopic endometrium with an agreement in estradiol formation originated from estradiol sulfate. The differential regulation of STS and SULT1E1 could provide insights for novel studies of the therapeutic use of STS inhibitors
expression analysis	4314	MMP3	26722547	In summary, site of endometrium, clinical stage and proliferative cycle were independent risk factors for EMS. The elevation of serum and ascites MMP-9 existed in EMS patients, of which those had ectopic endometrium, advanced stage and at proliferative stage had higher MMP-9 expression.
PCR	1499	CTNNB1	29734552	Blocking of Wnt/beta-catenin signal pathway caused the decrease of MMP-7 and VEGF expressions, in- dicating that Wnt/beta-catenin signal pathway plays an important role in the adhesion, invasion, and metastasis of endometriosis tissues
expression analysis	7422	VEGF	28356866	Determination of serum CA125, mRNA expression levels for survivin and VEGF along with TVU can contribute to higher accuracy of the noninvasive diagnostic tools for endometriosis
expression analysis	27022	FOXD3	26705148	Initial data mining and subsequent bioinformatics analysis of human endometrial microarray datasets identified FOXD3 to be a key regulator of gene expression specific to secretory phase/endometriosis. FOXD3 was dynamically expressed in healthy endometrium and differentially expressed in endometriosis.
expression analysis	2492	FSHR	26704526	our data suggest novel FSHR expression in endometriotic lesions, qualitatively and quantitatively different from that of normal endometrium
expression analysis	7421	VDR	26691009	Based on substantial favourable in vitro effects of vitamin D3 in endometriosis-related features of human endometriotic stromal cells, further investigations on therapeutic potential of this hormone in endometriosis are warranted
expression analysis	362	AQP5	26679484	Estrogen induces AQP5 expression by activating ERE in the promoter region of the AQP5gene, activates the PI3K/AKT pathway, and, promotes endometrial cell invasion and proliferation. These results provide new insights into some of the mechanisms that may underpin the development of deposits of ectopic endometrium
expression analysis	54583, 7428, 820	PHD2, VHL, CAMP	26677673	BWHR could effectively treat EM. Its mechanism might be associated with reducing contents of HIF-1alpha, serum CA125, and plasma cGMP, and up-regulating expressions of PHD2, VHL, and cAMP
expression analysis	5743	COX-2	26675577	Our results suggested the targeted interruption of COX-2 gene by siRNA effectively inhibited the mRNA and protein expression of COX-2, VEGF and MMP-9 in both eutopic ESC and ectopic ESC with endometriosis, greatly increased the apoptotic rate of cells and obviously reduced the content of 6-keto-PGF1alpha by inhibiting the activity of COX-2. And the changes in ectopic endometrium were more evident…
expression analysis	7040	TGF-beta	26675296	the present findings demonstrate that the niche TGF-beta plays a critical role in initiating expressions of pluripotent transcription factor OCT4 which may contribute to the ectopic endometrial growth by stimulating endometrial cell migration
expression analysis	7124	TNF-alpha	26674323	rhTNFR: Fc suppresses hESC survival and invasiveness and decreases the fluorescence intensity and implant size in the mouse model of endometriosis
expression analysis	4318, 7422, 7076	MMP-9 , VEGF, TIMP-1	26656198	Overexpression of SRB-RGS suppresses the migration and invasion ability of the E2-stimulated endometrial stromal cells. The molecular mechanism is the reduced expression of MMP-9 and VEGF, and the increased expression of TIMP-1. These findings suggest that the coding gene of SRB-RGS is a promising target gene for endometriosis gene therapy
expression analysis	29072	HIF-1	26654708	These findings suggest the unique therapeutic potential for echinomycin as an inhibitor of HIF-1 activation for endometriosis
expression analysis	11331	REA	26653759	Importantly, depletion of REA in primary human endometriotic stromal cells led to elevated proliferation and expression of cell cycle regulators. Notably, REA was significantly lower in human endometriotic tissue versus normal human endometrium. Thus, REA modulates cross talk among multiple cell types in the uterine tissue and host background, serving as a brake on the estradiol-ER axis and restr…
PCR	7124	TNF-alpha	26644856	We found a strong association between the -1031 T/C polymorphism in the promoter region of the TNF-alpha gene with endometriosis (P=0.001).
PCR	4830	NM23	26623033	the findings in the present pilot study suggest that nm23 polymorphisms do not contribute to EM susceptibility. However, more studies in larger populations are required to confirm these results.
expression analysis	4282	MIF	26622394	In endometrial cells from women with endometriosis, the level of E2-induced MIF upregulation was significantly higher than that in cells from women without endometriosis. In conclusion, this study demonstrated a significant increase in MIF expression in the endometrial tissues of women with endometriosis and an association between MIF expression and E2 level.
expression analysis	1021	CDK6	26618670	These dysregulated lncRNAs might provide information for new biomarkers or novel therapeutic targets of endometriosis. AC002454.1 might induce cell cycle disorder by regulating CDK6 to participate in the pathogenesis of endometriosis
expression analysis	4133, 6855	MAP-2, SYP	26604067	The present study revealed the presence of two selected neuronal markers, MAP-2 and SYP mRNAs and protein expression, in eutopic endometrium and in endometriotic lesions.
expression analysis	57381, 667	TCL, BPA	26604029	our data strongly suggest that TCL and BPA might alter human endometrium physiology so affecting fertility and pregnancy outcome
expression analysis	4314, 7076	MMP3, TIMP1	26591688	Compared with the normal control group, levels of MMP-1, MMP-2, and MMP-9 in eutopic and ectopic endometrium cell supernatants in the blank control group were increased, whereas levels of TIMP-1 and TIMP-2 were decreased (P < 0.05). Compared with the blank control group, levels of MMP-1 and MMP-2 in ectopic and eutopic endometrium cell supernatants cultured in low-dose, middle-dose, and high-dose…
expression analysis	7040	TGF-beta1	26577912	Our data supports role for ID1 in the pathophysiology of endometriosis, as an effector of TGFbeta1 dependent upregulation of VEGF-A, and highlights a novel potential therapeutic target
mutational analysis	8289	ARID1A	26572704	development of a screening method that can detect mutations of ARID1A and activation of the PI3K/AKT pathway might enable early diagnosis of endometriosisassociated ovarian cancers and endometrial cancers
expression analysis	3206	HOXA10	26552702	Alteration of HOX gene expression causes both uterine developmental abnormalities and impaired adult endometrial development that prevent implantation and lead to female infertility
expression analysis	2796	GNRH	26546756	Our data support the hypothesis that the decrease of PRL levels might contribute to the known effect of GnRH treatment in patients with endometriosis via suppression of VEGF expression in endometriotic lesions.
expression analysis	1555	P450	26530052	Our results demonstrate aberrant expressions of SF-1 and LRH-1 in endometriotic granulosa-lutein cells. This finding may be helpful in understanding infertility associated with endometriosis and reduced P450 aromatase activity in endometriotic granulosa cells
expression analysis	3206	Hoxa10, Igfbp1, Klf9, Pgr	26516123	This is the first controlled experiment demonstrating that endometriosis is not simply a local peritoneal disease. Selective alteration of genes critical for endometrial receptivity and endometriosis propagation may be systemic
meta analysis	1588, 1956, 2100, 2353, 3479	CYP19A1, EGFR, ESR2, FOS, IGF1	26512648	All three EDCs-PCB 153, phthalates, and BPA influenced five common genes-CYP19A1, EGFR, ESR2, FOS, and IGF1-in breast cancer as well as in endometriosis. These genes are environmentally and estrogen responsive, altered in human breast and uterine tumors and endometriosis lesions, and part of Mitogen Activated Protein Kinase (MAPK) signaling pathways in cancer. Our findings suggest that breast can…
expression analysis	1749, 1750	Dlx5, Dlx6	26512061	show that DLX5 is highly expressed in human endometrial glandular epithelium and that its expression is affected in endometriosis. We conclude that Dlx5 and Dlx6 expression determines uterine architecture and adenogenesis and is needed for implantation
expression analysis	999	CDH1	26484421	We investigated the CDH1 -160C/A and +54C/T variations with susceptibility to endometriosis in an Iranian population. In this case-control study, 149 patients with endometriosis (stages I-IV) and 151 healthy women as controls were included
expression analysis	8678	Beclin 1	26458502	There was no significant correlation between loss of Beclin 1 expression and FIGO stage, CA125 levels, patient age, status of endometriosis, Ki-67 labeling index, chemotherapy regimen or status of residual tumor. However, negative expression of Beclin 1 was associated with a shorter progression-free survival in comparison to positive Beclin 1 expression in OCCC who received cytoreductive surgery,…
mutational analysis	3184, 406940	AUF1, miR-148a	26433194	This is the first study to elucidate how microenvironmental hypoxia links to the epigenetic effects of DNA methylation in the endometriosis, and to delineate the molecular mechanism of hypoxia-coordinated AUF1/miR-148a interaction and recruitment to DNMT1 mRNA during the pathogenesis of endometriosis.
expression analysis	2099	ESR	26432349	studies regarding beta-catenin signaling are critical for improving our understanding of the pathogenesis of estrogen-induced endometriosis, which can translate into the development of treatments and therapeutic strategies for endometriosis.
mutational analysis	8289	ARID1A	26403563	The ARID1A mutation has been reported in preneoplastic lesions and may be an early marker in the transformation of endometriosis into cancer. The current evidence in respect to critical molecular pathways underscores the need to investigate possible role of targeted therapies in the treatment of EAOC.
SNPs	7421	VDR	26398313	a significant association was present between the AT haplotype, consisting of VDR rs1544410 and rs222857 minor alleles, and endometriosis-associated infertility [OR=1.659 (1.1222.453), P=0.011]. The results of the present study suggested that VDR gene variants act as genetic risk factors for endometriosisassociated infertility
expression analysis	7018	TF	26396550	we discuss the roles of the TF-fVII complex in the induction of malignant phenotypes in ovarian cancer cells. The hypoxic nature of ovarian cancer tissues and the roles of TF expression in endometriosis are discussed
expression analysis	1432	p38	26394174	PGE2 activates p38 and JNK signaling pathways, further stimulating c-Jun and activating transcription factor-2 binding to aromatase and ERB promoter regions with elevated estradiol production. Inhibition of JNK and P38 may be a potential method of treating human endometriosis.
expression analysis	8289	ARID1A	26378916	Our results suggest that Arid1a has a critical role in modulating epithelial proliferation which is a critical requisite for fertility. This finding provides a new signaling pathway for steroid hormone regulation in female reproductive biology and furthers our understanding of the molecular mechanisms that underlie dysregulation of hormonal signaling in human reproductive disorders such as endome…
expression analysis	5728	PTEN	26376893	Our data demonstrate that PTEN loss is detectable in endometrial tissues that are benign and malignant, with substantially more frequent loss in endometrial cancer compared with benign endometrium. However, alterations in expression were unrelated to most risk factors in this analysis, except for the association with NSAID use, which may represent a chance finding or reverse causality among patie…
meta analysis	4286, 9173	MI, T1	26370772	In conclusion, our meta-analysis supports that the GSTM1/GSTT1 null genotype might contribute to individual susceptibility to endometriosis in Chinese populations, especially in Chinese Han
expression analysis	7534	YWHAZ	26370665	Our data suggest that the presence of ectopic lesions in baboon causes changes in EuE miR expression as early as 3 months postinduction of the disease, and some of these changes may persist throughout the course of the disease. We propose that the marked down-regulation of miR-451 in both baboons and women with endometriosis increases the expression of multiple target genes. Increased expression …
expression analysis	1950, 3553, 185	EGF, IL-1beta, AGTR1	26366788	Our findings indicate that EGF, IL-1beta and AGTR1 may play important roles in the pathogenesis of endometriosis
expression analysis	54361	WNT4	26363035	The WNT4 expression level in EU was significantly reduced compared with that in normal endometrium of the control group, even when analyzed by the menstrual cycle phase. WNT4 was also downregulated in ectopic lesions. This study provides further evidence supporting the theory of "EU determinism" in the pathogenesis of endometriosis
expression analysis	7099	TLR4	26362992	the expression of TLR4 is higher in the eutopic endometrium than the normal endometrium and that ectopic tissue had the highest level of expression. TLR4 activation stimulated IL-8 secretion and the expression of its receptor CXCR1 in ESCs by activating p38/ERK, but not JNK and NK-kappaB signal pathways
expression analysis	406959	MIR183	26357653	ITGB1 is overexpressed in the endometrium of endometriosis patients. Furthermore, overexpression of ITGB1 rescued the repressive effects of miR-183 on the invasiveness of endometrial stromal cells. These findings, together with the fact that ITGB1 is a critical factor for cell adhesion and invasiveness, suggest that miR-183 may be involved in the development of endometriosis by regulating ITGB1 i…
expression analysis	7040	TGFB	26354330	Focal adhesion, regulation of actin cytoskeleton, MAPK and TGFB/SMAD signaling pathway may be important molecular mechanism underlying the pathogenesis of endometriosis
expression analysis	4286, 9173	M1, T1	26350109	GSTM1 null genotype frequency was similar between cases and controls. The GSTT1 null genotype was more frequent in the control group
expression analysis	362	AQP5	26350009	Down-regulation of AQP5 expression can suppress the proliferation and migration of ectopic endometrial epithelial cells and endometrial cell nodule formation in nude mice, in which AKT pathway may be involved.
expression analysis	7124	TNF-alpha	26350007	Estrogen can promote the growth of endometriotic lesions and may mediate the pathogenesis of endometriosis by activating mast cells, which may be associated with increasing TNF-alpha and NGF levels
PCR	2332	FMR1	26345686	The FMR1 premutation (55-200 repeats) is a known cause of primary ovarian insufficiency. However, the relationship between high normal CGG repeat numbers (35-54 repeats) and ovarian reserve has yet to be conclusively demonstrated
expression analysis	27178	IL-37	26342048	These findings suggest that increased expression of IL-37 was present in eutopic and ectopic endometrium of women with ovarian endometriosis, which might be involved in the inflammatory process of endometriomas
PCR	115352	FCRL3	26334889	the present study suggested that FCRL3_3 variant was associated with an increased risk of endometriosis-related infertility, regardless of symptoms, and rASRM stage of the patients. Meta-analysis of previous studies combined with the present study further confirmed our results. Further large-scale studies in the future are warranted to explore the association between FCRL3 genetic polymorphisms a…
expression analysis	2852	GPER	26333495	GPER and Gankyrin might be involved in the pathogenesis of OEM, which could possibly facilitate the formation of ectopic lesions
mutational analysis	6866	NKB	26312915	This effect is likely to be mediated by reduced secretion of gonadotropin-releasing hormone and our results support the involvement of NKB in the control of human reproduction: further analysis will explore in detail effects on secretion of follicle-stimulating hormone and luteinising hormone. Our findings have potential for translational application, for example in endometriosis and contraceptio…
expression analysis	667	BPA	26307436	The association between the pro-collagen shift in increased collagen expression and decreased MMP2 expression and activity implies that strain differences and BPA exposure alter regulation of endometrial remodeling and contribute to increased fibrosis, a component of several human uterine diseases.
expression analysis	7422	VEGF-A	26307093	This is the first study describing a modified miRNA expression profile in eutopic cells from patients in response to PF from patients. These promising results improve the body of knowledge on endometriosis pathogenesis and could open up new therapeutic strategies for the treatment of endometriosis through the use of miRNAs.
expression analysis	6870	NK3	26305889	Together these data support the proposed role of neurokinin B-NK3R signaling in the control of pulsatile GnRH secretion. Furthermore, in contrast to GnRH antagonists, NK3R antagonists induce a partial suppression of estradiol and thereby offer a viable therapeutic approach to the treatment of ovarian sex hormone disorders with a mitigated risk of menopausal-like adverse events in response to long…
expression analysis	94025	CA125	26289914	In addition, considering that the serum CA19-9 levels in stage I mucinous borderline ovarian tumors were elevated via the interstitial infiltration of leukocytes and that precancerous lesions are associated with a cancerous glycosylation disorder in the process of inflammatory carcinogenesis, the CA19-9 level may be considered a suitable biomarker for estimating drug susceptibility
expression analysis	4318	MMP-9	26289107	The present study suggests that the up-regulation of MMP-9 via activation of OPN induced by estrogen may correlate with the migration of endometrial epithelial cells in patients with endometriosis
expression analysis	140453	MUC17	26285705	MUC17 polymorphisms are involved in endometriosis development and the associated infertility in the Taiwanese population
mutational analysis	5290	PIK3CA	26276776	Distinct molecular events may occur in relatively early stages of tumorigenesis of endometriosis-associated OEMCas and OCCCas
RT-PCR	5743	COX-2	26276091	Our study demonstrated that DNA hypomethylation of the NF-IL6 site within the promoter of COX-2 gene could be a key mechanism for its elevated expression in the eutopic and ectopic tissues of endometriosis.
PCR	Not_found	PROGINS	11821246	PROGINS appears to be associated with endometriosis in white pers
expression analysis	3292	HSD17B1	26261478	This meta-analysis suggested that HSD17B1 rs605059 polymorphisms were not associated with the risks of endometrial cancer and endometriosis. Further studies are needed to validate the conclusion and clarify the relationship between HSD17B1 rs605059 polymorphisms and the risk of uterine leiomyoma
expression analysis	3605	IL-17A	26259585	Thus, we provide the first evidence, to our knowledge, that endometriotic lesions produce IL-17A and that the removal of the lesion via laparoscopic surgery leads to the significant reduction in the systemic levels of IL-17A. Taken together, our data show a likely important role of IL-17A in promoting angiogenesis and proinflammatory environment in the peritoneal cavity for the establishment and …
expression analysis	7442	TRPV1	26242126	NGF and TRPV1 participated in the occurrence of pain in EMS. BSWYHYR played an important role in inhibiting EMT-induced pain through reducing the up-regulation of NGF on TRPV1
expression analysis	1629	E2	26240828	This study is the first to demonstrate a possible relationship between endometriosis and enhanced prostaglandin activity. In view of the wide range of prostaglandin functions, increasing cell receptivity and facilitating uptake in endometrial tissue could contribute to the initial steps of overgrowth and have an important role to play in the pathogenesis and symptoms of this disease
expression analysis	1789	DNMT3B	26239024	The inability to downregulate DNMT3B expression in E-OSIS may contribute to an aberrant epigenetic fingerprint that misdirects gene expression in endometriosis and contributes to its altered response to steroid hormones
expression analysis	3294	HSD17B2	26228249	In addition, ATRA treatment decreased the mRNA expression of 17-beta-dehydrogenase 2 (HSD17B2) which converts estradiol into estrone in a dose-dependent manner, and the ELISA measurements indicated that estradiol production in the OEC tissue was inhibited by ATRA treatment
expression analysis	10498	CARM1	26224097	These results demonstrate that endometriosis is associated with changes of epigenetic profiles in the primate ovary and suggest that arginine methyltransferases play a prominent role in mediating the ovarian response to endometriosis. Owing to the critical role of CARM1 in nuclear receptor-mediated transcription and maintenance of pluripotency in the cleavage stage embryo, our results suggest tha…
expression analysis	51, 100, 26191	ACP1, ADA, PTPN22	26216523	ADA6, PTPN22 and ACP1 are involved in immune reactions: since endometriosis has an autoimmune component, a cooperative interaction among these genetic systems appears biological plausible. The present result could contribute to explain the differences observed among populations concerning the association between p53 codon 72 and endometriosis
expression analysis	1629	E2	26199416	Peritoneal fluid concentrations of prostaglandin E2 (PGE2) are higher in women with endometriosis, and this increased PGE2 plays important role in survival and growth of endometriosis lesions. The objective of the present study was to determine the effects of pharmacological inhibition of PGE2 receptors, EP2 and EP4, on molecular and cellular aspects of the pathogenesis of endometriosis and assoc…
expression analysis	7291	TWIST1	26198055	Epithelial TWIST1 is overexpressed in endometriosis and may contribute to the formation of endometriotic lesions by inducing epithelial to mesenchymal transition, as CDH1 was reduced in ectopic lesions. We found exclusive expression of either TWIST1 or MYC in the same samples, indicating that EMT and proliferation contribute independently of each other to the formation of endometriotic lesions.
expression analysis	7157	TP53	26194887	This study investigated the association between TP53 codon 72 polymorphism and the risk of endometriosis. A search for relevant articles was conducted in PubMed, Embase, CNKI, Wanfang, Weipu databases and Google Scholar. The strength of the relationships between TP53 codon 72 polymorphism and the risk of endometriosis was assessed by odds ratios (OR) and with 95% confidence intervals (CI)
expression analysis	2852	GPER	26193952	GPER and Gankyrin might be implicated in the hormonal regulation of endometriosis and be associated with the severity of endometriosis. In addition, GPER and Gankyrin were found to be positively correlated, which could possibly serve as novel therapeutic targets for this disease
expression analysis	1612	DAPK1	26191186	the miR-191-DAPK1 axis may play an important role modulating the response of ovarian endometriosis and endometrioid carcinoma cells to death-inducers and might contribute malignant transformation of endometriosis
expression analysis	3091	HIF-1alpha	26191163	Our findings indicate that miR-199a may attenuate the angiogenic potential of ESCs under hypoxia partly through HIF-1alpha/VEGF-A pathway suppression. Therefore, miR-199a may play pivotal roles in the pathogenesis of endometriosis and may become a potential therapeutic target of this disease
PCR	7097, 7099	TLR2, TLR4	26177128	The results obtained may be indicative of an important role of TLR2 and TLR4 in the development of endometrioid ectopia and should be considered while treating infertility in women with endometriosis
expression analysis	7422	MMP3, VEGFA	26175939	The finding of this study suggests that deregulation of miR-93 contribute to endometriosis by up-regulation of MMP3 and VEGFA and thus provide potential therapeutic targets for the treatment of endometriosis
expression analysis	960	CD44	26169039	Early endometriotic lesions were also significantly decreased when both peritoneal and endometrial tissues lacked CD44 expression (P < .01). These studies demonstrate that both EC and PMC CD44 play a role in the development of early endometriotic lesion
qRT-PCR	5743	COX-2	26153366	The present study identified that in Brazilian women the presence of the ancestral allele, -765G, of the COX-2 gene is associated with an increased risk for development of moderate/severe endometriosis associated with fertility, and that the eutopic endometrium of women with endometriosis showed increased expression of COX-2 when compared to the control group
expression analysis	4313	MMP-2	26153131	Taken together, these results suggest that leptin may contribute to the migration and invasion abilities of endometriotic cells via the up-regulation of MMP-2 through an ObR-dependent JAK2/STAT3 signaling pathway
SNPs	54361	WNT4	26139156	Our results suggested that rs16826658 and rs3820282 polymorphisms on WNT4 gene might be involved in the pathogenesis of endometriosis in the infertile women studied. Analysis of WNT4 genetic variants might help to identify patients at high risk for disease development
expression analysis	1588	CYP19	26135543	We also noted that VPA inhibited cell viability and proliferation, and induced the apoptosis, of ESCs. The findings of our study on histone acetylation, endometriosis and the CYP19 gene provide insight which may aid in the research of histone acetylation and suggest that the CYP19 gene may be a novel therapeutic target and method for the treatment of endometriosis
expression analysis	3170, 7022	FOXA2, TFAP2C	26134036	our analysis revealed that the function of AR and p53 in endometriosis is regulated by posttranscriptional changes and not by differential gene expression. Our integrative analysis provides new insights into the regulatory programs involved in endometriosis
expression analysis	7472, 1499	WNT2, beta-catenin	26116230	Wnt2/beta-catenin signaling was involved in stromal-epithelial cells interaction in endometriosis. Metformin might regulate the stroma-epithelium communication via Wnt2-mediated signaling in endometriosis
expression analysis	283120	H19	26089099	Our finding represents the first example of a lncRNA-based mechanism in endometriosis and its associated infertility, thus holding potential in the development of novel therapeutics for women with endometriosis and infertility.
PCR	7515, 7518	XRCC1, XRCC4	26088159	The XRCC4 -1394T/G polymorphism was associated with susceptibility to endometriosis in an Iranian population
expression analysis	5728	PTEN	26059197	Loss of PTEN expression is proposed as an early and permissive event in endometriosis development, while the loss of ER and polycomb-mediated transcriptional reprogramming for pluripotency may play an important role in the ultimate transformation process. Our study provides new evidence to redefine the pathogenic programme for lineage-specific transformation of endometriosis to OCCC
expression analysis	1588	CYP19A1	26058395	Metformin could inhibit PGE2-induced CYP19A1 mRNA expression and aromatase activity via AMPK activation and inhibition of CREB to CYP19A1 PII in human ESCs. The results of the present study suggest that metformin may have unique therapeutic potential as an antiendometriotic drug in the future
PCR	3569, 948, 3726, 2683, 3280, 3164	IL6, CD36, JUNB, B4GALT1, HES1, NR4A1	26057344	There were differentially expressed genes in the serum before and after ultrasound-guided ethanol sclerotherapy in patients with ovarian endometriomas. Notably, the expressions of IL6, CD36, JUNB, B4GALT1, HES1, and NR4A1, which are strongly associated with the pathogenesis of ovarian endometriomas, were significantly down-regulated after ethanol sclerotherapy
expression analysis	3206, 3207	HOXA-10 , HOXA-11	26056923	Laparoscopic endometrioma resection increases peri-implantation endometrial HOXA-10 and HOXA-11 mRNA expression, suggesting an improvement in endometrial receptivity
expression analysis	5743	COX-2	26054111	genetic variation of G to A at -1195 locus in the promoter region of COX-2 gene increases the risk of endometriosis and adenomyosis, and the genetic susceptibility of these two diseases are similar
expression analysis	604	Bcl-6	26054109	Bcl-6 mRNA level was significantly lower and Blimp-1 mRNA level was significantly higher in the endometriosis group with significant correlations among transcriptional factors, Igs, and cytokines (p < 0.05).
expression analysis	207, 5595	AKT, ERK1/2	26051103	Our results suggest that dienogest treatment of endometriotic cells suppresses AKT and ERK1/2 activity, thereby in turn inhibiting mTOR, inducing autophagy, and promoting apoptosis
expression analysis	6277	S100A6	26044826	S100A6 induces expression of beta-catenin in endometrial stromal cells.
expression analysis	6927	HNF-1beta	26030369	overexpression of HNF-1beta led to upregulation of bcl-2 expression at the transcriptional level in TOV-21G cells, which provided evidence for a positive correlation between HNF-1beta and bcl-2 expression in OCCCs. These data, therefore, suggest that association between HNF-1beta and NF-kappaB signaling may participate in cell survival by alteration of apoptotic events, particularly in mitochondr…
expression analysis	6927	HNF-1beta	26012699	association between HNF-1beta and NF-kappaB signaling may participate in cell survival by alteration of apoptotic events, particularly in mitochondria-mediated pathways, through upregulation of bcl-2 expression in OCCCs
expression analysis	682	CD147	25996258	The presently found strong correlations between Bcl-2 and CD147, ERK, and CD147 in human endometriotic lesions and the demonstrated reduced cell apoptosis through CD147-ERK-Bcl-2 intrinsic apoptosis signaling axis suggest that this CD147-regulated signaling may contribute to the enhanced cell survival in the progression of human EMS.
expression analysis	2661	GDF-9	29259415	Moderate to severe endometriosis can significantly reduce GDF-9 mRNA expression in the granulosa cells of patients with the disease compared with those without, thus causing poor oocyte maturation and lower embryo quality
expression analysis	6761, 90865	ST2, IL-33	25977120	IL-33 and sST2 values observed in PF were found to correlate with endometriosis severity. Elevated and correlated PF IL-33 and sST2 levels from patients with endometriosis suggested a potential role as surrogate markers of disease activity
expression analysis	207, 5594	AKT,ERK	25976656	Co-targeting the AKT and ERK pathways may be an effective therapeutic strategy for endometriosis treatment
PCR	6387, 7852	CXCL12, CXCR4	25976655	Based on a human autophagy PCR array, CXCL12 and CXCR4, which is the CXCL12 receptor, in ESCs were predicted to be molecules that mediate the abnormally lower autophagy in endometriosis
expression analysis	4803, 3827	NGF, BK	25975051	NGF and BK/BKB1R may play an important role in the development of endometriosis-associated dysmenorrhea, and BD was found to inhibit the development of endometriosis and relieve dysmenorrhea by influencing NGF and BK/ BKB1R mRNA and protein levels.
expression analysis	4436	MSH2	25973079	We found significant loss of MMR proteins (known to be associated with microsatellite instability) in the stromal component of ETs. The group of ETs with glandular cytoplasmic staining for aurora A kinase had higher MMR protein expression, suggesting an increased activity of this system. Our result suggests a novel role of increased MSH2 expression in cellular proliferation of endometriosis
expression analysis	5747	FAK	25973072	FAK expression in endometrial stromal cells from endometriosis was more sensitive to estrogen, which might contribute to the pathogenesis and progress of endometriosis.
expression analysis	94025	CA125	25967705	Laparoscopic surgery in endometriosis patients with high expression of CA125 is curative, and the patients'recovery after surgery is promising.
expression analysis	4015	LOX	25963914	This study documents that expression of LOX is differentially regulated in endometriotic lesions and endometrium. A role for LOX in mediating proliferation, migration, and invasion of endometrial and endometriotic cells was observed, which may be implicated in the establishment and progression of endometriotic lesions
expression analysis	6387, 7852	CXCL12, CXCR4	25957946	The E2-CXCL12/CXCR4 signaling pathway may be useful in determining treatments for endometrial disorders, and may be antagonized to block stem cell migration to endometriosis
SNPs	1813	DRD2	25955176	present results did not confirm DRD2 gene variants to be genetic risk factors for endometriosis-related infertility
expression analysis	6647	SOD1	25947891	Only infertile women with moderate/severe endometriosis showed increased expression of the SOD1 in CCs compared to women with minimal/mild endometriosis and controls, with a positive interaction between increased expression and the occurrence of CP, suggesting that SOD1 might be a potential biomarker of CP following ICSI
expression analysis	9242	MSC	25918595	MSC from human umbilical cord reduced nerve fi ber density in the treatment group with the transplantation of hUC-MSCs
expression analysis	8289	ARID1A	25913291	The action of ARID1A in carcinogenesis differs between adenofibroma-related CCC and endometriosis-related CCC
expression analysis	8289	ARID1A	25912412	Loss of ARID1A-encoded protein seems to be an early event in EOAC, along with pAKT activation, alteration of gammaH2AX, and concomitant activation of the apoptosis pathway
expression analysis	51621	KLF13	25904015	Results demonstrate lack of a causative relationship between endometrial KLF13 deficiency and lesion establishment in mice, and they support the broader participation of multiple signaling pathways, besides those mediated by steroid receptors, in the pathology of endometriosis
SNPs	7157	TP53	25889195	In conclusion, TP53 Arg72Pro polymorphism (rs1042522) was positively associated with risk of endometriosis, particularly among Asians. However, its potential role in Caucasians should not be ignored
expression analysis	4790	NFKB1	25877425	Through targeting suppressed the NF-kappaB gene expression by NF-kappaB shRNA, we can inhibit the development of endometriosis through reducing the ability of angiogenesis and cell proliferation of ectopic endometrial cells
expression analysis	80895	ILKAP	25872452	A low level of ILKAP could facilitate the pathogenesis of endometriosis. Additionally, the level of ILKAP expression in ectopic endometrium might reflect the severity of endometriosis
meta analysis	3383	ICAM-1	25859827	Independent data for the late stages of endometriosis suggest protection of the ICAM-1 K469E polymorphism among the Asians (OR 0.91-0.95, p = 0.35-0.71). These effects were weak but non-heterogeneous (P heterogeneity = 0.17-0.57, I (2) = 0-40 %)
expression analysis	4827	NCR	29259412	The present review examines variations in the expression of NCRs on NK cells, the participation of NK22 cells in reproduction, and the possible use of intravenous immunoglobulin or intralipid treatment for women with recurrent pregnancy loss and NK cell abnormality.
expression analysis	2625	GATA3	25851711	Our study demonstrates that GATA3 protein is expressed in most mesonephric lesions, regardless of them being benign or malignant. In contrast, GATA3 is absent in the majority of endometrial and endocervical adenocarcinomas. These results support that GATA3 immunostain can be a useful tool in differentiating mesonephric lesions from endocervical and endometrial adenocarcinomas
expression analysis	3565	IL4	25850899	the antibody-mediated targeted delivery of IL4 inhibits the development of endometriosis in a syngeneic mouse model by likely impairing adhesion, invasion, and vascularization of the ectopic endometrium
expression analysis	5732, 5734	EP2, EP4	25843056	In this study, we report for the first time that inhibition of PGE2-EP2/EP4 signaling modulates DNA methylation, H3 histone methylation and acetylation, and epigenetic memory machinery proteins in human endometriotic epithelial cells and stromal cells. Thus, targeting EP2 and EP4 receptors may emerge as long-term nonsteroidal therapy for treatment of active endometriotic lesions in women.
expression analysis	2146	EZH2	25820690	This study provides evidence in support of a role of H3K27me3 in the pathogenesis of endometriosis and for EZH2 as a potential therapeutic target for this disease, but more studies are necessary to understand the molecular mechanisms at play
expression analysis	7078	TIMP3	25819812	miR-191 can directly regulate TIMP3 expression, thereby affecting cell proliferation rate and invasion ability. The miR-191-TIMP3 axis might be critical in the malignant transformation of endometriosis to EAOC
expression analysis	9687	GREB1	25788566	This study further implicates the GREB1 region on chromosome 2p25.1 and the GREB1 gene with involvement in endometriosis risk. More detailed functional studies are required to determine the role of the novel GREB1 transcripts in endometriosis pathophysiology
expression analysis	5320	PLA2G2A	25780526	The present study suggests that the 763C>G polymorphism of PLA2G2A plays an important role as an independent factor in the risk of endometriosis in Iranian women
expression analysis	8678	Beclin 1	25780525	The present study strongly suggests that Beclin-1 may play a role in the formation and progression of endometriosis
expression analysis	1588	CYP19A1	25773531	Our results show reduced expression of the CYP19A1 in cumulus cells of infertile women with endometriosis, which may play a role in the pathogenesis of endometriosis-related infertility
expression analysis	406884, 406886, 406888	let-7b, 7d, 7f	25772772	combination of serum let-7b, 7d, and 7f levels during the proliferative phase may serve as a diagnostic marker for endometriosis
expression analysis	3292	HSD17beta1	25767055	In OESCs, DNG inhibited HSD17beta1 expression and enzyme activity at 10(-7) M (P<0.01). Results of immunohistochemical analysis displayed reduced HSD17beta1 staining intensity in OE w/D (P<0.05). In conclusion, DNG exerts comprehensive inhibition of abnormal estrogen production through inhibition of aromatase and HSD17beta1, contributing to a therapeutic effect of DNG on endometriosis
expression analysis	2100	ERbeta	25766517	In the presence of aggregated and thus activated platelets in endometriotic lesions, ERbeta, but not ERalpha, is upregulated in endometriotic stromal cells. Our result suggests that the use of antiplatelet therapy may have potential in the treatment of endometriosis
expression analysis	4790	NFKB1	25766500	This study shows the need for future mechanistic studies of oxidative stress, MAPK/NF-kappaB signaling, and ER-alpha as molecular mediators of DEHP-associated endometrial stromal cell alterations, which may be associated with the development of endocrine-related disease such as endometriosis.
expression analysis	10631	PN	25759370	As an agonist in the development and progression of endometriosis, PN may be a new clinical treatment target of endometriosis.
expression analysis	406934	miR-142-3p	25754227	At the functional level, miR-142-3p overexpression significantly reduced cell viability (P ndometriosis
expression analysis	6774	STAT3	25750101	Our results imply that aberrant activation of STAT3 signaling plays an important role in the pathogenesis of endometriosis
expression analysis	2852	GPER	25724739	G-1 suppressed proliferation and induced apoptosis in ESCs, suggesting the potential use of this compound as a therapeutic drug for the treatment of endometriosis
expression analysis	3810	KIR2DS5	25724317	Our data suggest that KIR2DS5 may be associated with protection from endometriosis, whereas KIR2DS4del seems to be associated with higher disease stages, possibly by exclusion of protective KIR2DS5
expression analysis	1081	HCG	25722014	HCG therapy appears to be an effective treatment for endometriosis in rats through down-regulation of leptin expression in eutopic and ectopic endometrium
[truncated: 1,536 more rows]
