# Supplementary material for: Genetic links between endometriosis and cancers in women
Source: PeerJ. 2019 Dec 20;7:e8135. doi: 10.7717/peerj.8135 (PMC6927350; doi:10.7717/peerj.8135)
Supplement: Table S4 [file peerj-07-8135-s006.xlsx]

## Sheet: Sheet1
Category	ID	Name	p-value	Hit Count in Query List	Hit Count in Genome	Hit in Query List
GO: Molecular Function	GO:0042562	hormone binding	7.878e-07	5	83	RXFP1,PTH1R,ESR1,PGR,AGTR1
GO: Molecular Function	GO:0005165	neurotrophin receptor binding	3.023e-06	3	14	NGF,NTF3,BDNF
GO: Molecular Function	GO:0001228	DNA-binding transcription activator activity, RNA polymerase II-specific	8.029e-06	7	357	GATA2,SOX17,HOXA10,FOXA2,PAX8,ESR1,PGR
GO: Molecular Function	GO:0019838	growth factor binding	1.111e-05	5	142	PTN,THBS1,HTRA1,NTF3,NRP2
GO: Molecular Function	GO:0005102	signaling receptor binding	1.26e-05	13	1601	NGF,PTN,CCL2,C3,CXCL16,THBS1,NTF3,LEP,TNFSF13B,ESR1,BDNF,PGR,AGTR1
GO: Molecular Function	GO:0001077	proximal promoter DNA-binding transcription activator activity, RNA polymerase II-specific	1.499e-05	6	259	GATA2,HOXA10,FOXA2,PAX8,ESR1,PGR
GO: Molecular Function	GO:0008083	growth factor activity	2.364e-05	5	166	NGF,PTN,NTF3,LEP,BDNF
GO: Molecular Function	GO:0005126	cytokine receptor binding	2.781e-05	6	289	NGF,CCL2,CXCL16,NTF3,TNFSF13B,BDNF
GO: Molecular Function	GO:0043394	proteoglycan binding	5.274e-05	3	35	PTN,THBS1,FST
GO: Molecular Function	GO:0008289	lipid binding	8.341e-05	8	701	PLCB1,PLA2G2A,C3,LPAR3,THBS1,PEMT,ESR1,PGR
GO: Molecular Function	GO:0005539	glycosaminoglycan binding	8.847e-05	5	219	PTN,CCL2,THBS1,DCN,NRP2
GO: Molecular Function	GO:0000982	transcription factor activity, RNA polymerase II proximal promoter sequence-specific DNA binding	0.0001016	6	365	GATA2,HOXA10,FOXA2,PAX8,ESR1,PGR
GO: Molecular Function	GO:0060089	molecular transducer activity	0.0001245	12	1708	MSR1,LPAR3,CXCL16,CLDN3,RXFP1,CSF1R,PAX8,PTH1R,ESR1,PGR,AGTR1,NRP2
GO: Molecular Function	GO:1901681	sulfur compound binding	0.0001975	5	260	PTN,CCL2,THBS1,FST,NRP2
GO: Molecular Function	GO:0001664	G protein-coupled receptor binding	0.0002604	5	276	CCL2,C3,CXCL16,ESR1,AGTR1
GO: Molecular Function	GO:0001067	regulatory region nucleic acid binding	0.0003554	8	866	GATA2,SOX17,HOXA10,IRF6,FOXA2,PAX8,ESR1,PGR
GO: Molecular Function	GO:0008201	heparin binding	0.0003986	4	167	PTN,CCL2,THBS1,NRP2
GO: Molecular Function	GO:0000981	DNA-binding transcription factor activity, RNA polymerase II-specific	0.0004401	7	675	GATA2,SOX17,HOXA10,FOXA2,PAX8,ESR1,PGR
GO: Molecular Function	GO:0030169	low-density lipoprotein particle binding	0.0005014	2	16	MSR1,THBS1
GO: Molecular Function	GO:0038023	signaling receptor activity	0.0005675	10	1436	LPAR3,CLDN3,RXFP1,CSF1R,PAX8,PTH1R,ESR1,PGR,AGTR1,NRP2
GO: Molecular Function	GO:0000978	RNA polymerase II proximal promoter sequence-specific DNA binding	0.001098	5	379	HOXA10,FOXA2,PAX8,ESR1,PGR
GO: Molecular Function	GO:0005543	phospholipid binding	0.001177	5	385	PLCB1,PLA2G2A,LPAR3,THBS1,PEMT
GO: Molecular Function	GO:0019955	cytokine binding	0.001292	3	103	THBS1,CSF1R,NRP2
GO: Molecular Function	GO:0071814	protein-lipid complex binding	0.00134	2	26	MSR1,THBS1
GO: Molecular Function	GO:0071813	lipoprotein particle binding	0.00134	2	26	MSR1,THBS1
GO: Molecular Function	GO:0000987	proximal promoter sequence-specific DNA binding	0.001364	5	398	HOXA10,FOXA2,PAX8,ESR1,PGR
GO: Molecular Function	GO:0043565	sequence-specific DNA binding	0.001662	8	1096	GATA2,SOX17,HOXA10,FOXA2,EMX2,PAX8,ESR1,PGR
GO: Molecular Function	GO:0001046	core promoter sequence-specific DNA binding	0.001773	3	115	GATA2,PAX8,ESR1
GO: Molecular Function	GO:0044212	transcription regulatory region DNA binding	0.001821	7	860	GATA2,SOX17,HOXA10,FOXA2,PAX8,ESR1,PGR
GO: Molecular Function	GO:0000977	RNA polymerase II regulatory region sequence-specific DNA binding	0.001825	6	630	GATA2,HOXA10,FOXA2,PAX8,ESR1,PGR
GO: Molecular Function	GO:0001012	RNA polymerase II regulatory region DNA binding	0.001914	6	636	GATA2,HOXA10,FOXA2,PAX8,ESR1,PGR
GO: Molecular Function	GO:1904399	heparan sulfate binding	0.002094	1	1	PTN
GO: Molecular Function	GO:0001596	angiotensin type I receptor activity	0.002094	1	1	AGTR1
GO: Molecular Function	GO:0004608	phosphatidylethanolamine N-methyltransferase activity	0.002094	1	1	PEMT
GO: Molecular Function	GO:0031715	C5L2 anaphylatoxin chemotactic receptor binding	0.002094	1	1	C3
GO: Molecular Function	GO:0000773	phosphatidyl-N-methylethanolamine N-methyltransferase activity	0.002094	1	1	PEMT
GO: Molecular Function	GO:0080101	phosphatidyl-N-dimethylethanolamine N-methyltransferase activity	0.002094	1	1	PEMT
GO: Molecular Function	GO:0008116	prostaglandin-I synthase activity	0.002094	1	1	PTGIS
GO: Molecular Function	GO:0031714	C5a anaphylatoxin chemotactic receptor binding	0.002094	1	1	C3
GO: Molecular Function	GO:0001965	G-protein alpha-subunit binding	0.002157	2	33	LPAR3,AGTR1
GO: Molecular Function	GO:0000976	transcription regulatory region sequence-specific DNA binding	0.003181	6	704	GATA2,HOXA10,FOXA2,PAX8,ESR1,PGR
GO: Molecular Function	GO:1990837	sequence-specific double-stranded DNA binding	0.003932	6	735	GATA2,HOXA10,FOXA2,PAX8,ESR1,PGR
GO: Molecular Function	GO:0017046	peptide hormone binding	0.003981	2	45	PTH1R,AGTR1
GO: Molecular Function	GO:0003700	DNA-binding transcription factor activity	0.00404	8	1264	GATA2,SOX17,HOXA10,IRF6,FOXA2,PAX8,ESR1,PGR
GO: Molecular Function	GO:0004991	parathyroid hormone receptor activity	0.004176	1	2	PTH1R
GO: Molecular Function	GO:0038052	RNA polymerase II transcription factor activity, estrogen-activated sequence-specific DNA binding	0.004176	1	2	ESR1
GO: Molecular Function	GO:0005011	macrophage colony-stimulating factor receptor activity	0.004176	1	2	CSF1R
GO: Molecular Function	GO:0005169	neurotrophin TRKB receptor binding	0.004176	1	2	BDNF
GO: Molecular Function	GO:0031798	type 1 metabotropic glutamate receptor binding	0.004176	1	2	ESR1
GO: Molecular Function	GO:0004996	thyroid-stimulating hormone receptor activity	0.004176	1	2	PAX8
GO: Molecular Function	GO:0005163	nerve growth factor receptor binding	0.004176	1	2	NGF
GO: Molecular Function	GO:0005044	scavenger receptor activity	0.004336	2	47	MSR1,CXCL16
GO: Molecular Function	GO:0008009	chemokine activity	0.004518	2	48	CCL2,CXCL16
GO: Molecular Function	GO:0001047	core promoter binding	0.00483	3	164	GATA2,PAX8,ESR1
GO: Molecular Function	GO:0004879	nuclear receptor activity	0.004894	2	50	ESR1,PGR
GO: Molecular Function	GO:0032813	tumor necrosis factor receptor superfamily binding	0.004894	2	50	NGF,TNFSF13B
GO: Molecular Function	GO:0098531	transcription factor activity, direct ligand regulated sequence-specific DNA binding	0.004894	2	50	ESR1,PGR
GO: Molecular Function	GO:0004888	transmembrane signaling receptor activity	0.00542	8	1327	LPAR3,CLDN3,RXFP1,CSF1R,PAX8,PTH1R,AGTR1,NRP2
GO: Molecular Function	GO:0043621	protein self-association	0.006104	2	56	PTH1R,AGTR1
GO: Molecular Function	GO:0050840	extracellular matrix binding	0.006104	2	56	THBS1,DCN
GO: Molecular Function	GO:0035373	chondroitin sulfate proteoglycan binding	0.006257	1	3	PTN
GO: Molecular Function	GO:0031711	bradykinin receptor binding	0.006257	1	3	AGTR1
GO: Molecular Function	GO:0003707	steroid hormone receptor activity	0.006755	2	59	ESR1,PGR
GO: Molecular Function	GO:0003690	double-stranded DNA binding	0.00679	6	823	GATA2,HOXA10,FOXA2,PAX8,ESR1,PGR
GO: Molecular Function	GO:0042379	chemokine receptor binding	0.006979	2	60	CCL2,CXCL16
GO: Molecular Function	GO:0005166	neurotrophin p75 receptor binding	0.008334	1	4	NTF3
GO: Molecular Function	GO:0070052	collagen V binding	0.008334	1	4	THBS1
GO: Molecular Function	GO:0034056	estrogen response element binding	0.008334	1	4	ESR1
GO: Molecular Function	GO:0070915	lysophosphatidic acid receptor activity	0.008334	1	4	LPAR3
GO: Molecular Function	GO:0000979	RNA polymerase II core promoter sequence-specific DNA binding	0.008391	2	66	GATA2,PAX8
GO: Molecular Function	GO:0004714	transmembrane receptor protein tyrosine kinase activity	0.008638	2	67	CSF1R,NRP2
GO: Molecular Function	GO:0004857	enzyme inhibitor activity	0.008909	4	393	NGF,PTN,C3,DCN
GO: Molecular Function	GO:0038024	cargo receptor activity	0.009657	2	71	MSR1,CXCL16
GO: Molecular Function	GO:0005518	collagen binding	0.00992	2	72	THBS1,DCN
GO: Molecular Function	GO:0038085	vascular endothelial growth factor binding	0.01041	1	5	PTN
GO: Molecular Function	GO:0004945	angiotensin type II receptor activity	0.01041	1	5	AGTR1
GO: Molecular Function	GO:0030284	estrogen receptor activity	0.01041	1	5	ESR1
GO: Molecular Function	GO:0031727	CCR2 chemokine receptor binding	0.01041	1	5	CCL2
GO: Molecular Function	GO:0070051	fibrinogen binding	0.01041	1	5	THBS1
GO: Molecular Function	GO:0005125	cytokine activity	0.01108	3	222	CCL2,CXCL16,TNFSF13B
GO: Molecular Function	GO:0001595	angiotensin receptor activity	0.01248	1	6	AGTR1
GO: Molecular Function	GO:0051117	ATPase binding	0.01424	2	87	ESR1,PGR
GO: Molecular Function	GO:0005021	vascular endothelial growth factor-activated receptor activity	0.01454	1	7	NRP2
GO: Molecular Function	GO:0030297	transmembrane receptor protein tyrosine kinase activator activity	0.01454	1	7	NGF
GO: Molecular Function	GO:0048406	nerve growth factor binding	0.01454	1	7	NTF3
GO: Molecular Function	GO:0008013	beta-catenin binding	0.01486	2	89	SOX17,ESR1
GO: Molecular Function	GO:0019199	transmembrane receptor protein kinase activity	0.0155	2	91	CSF1R,NRP2
GO: Molecular Function	GO:0005167	neurotrophin TRK receptor binding	0.0166	1	8	BDNF
GO: Biological Process	GO:0051094	positive regulation of developmental process	1.181e-14	21	1323	GATA2,MSR1,SOX17,NGF,PTN,PLCB1,PLA2G2A,C3,LPAR3,THBS1,CSF1R,FOXA2,DCN,FST,PAX8,NTF3,PTGIS,LEP,TNFSF13B,BDNF,AGTR1
GO: Biological Process	GO:0022603	regulation of anatomical structure morphogenesis	1.95e-12	18	1128	GATA2,SOX17,NGF,PTN,CCL2,C3,LPAR3,THBS1,CSF1R,FOXA2,DCN,PAX8,PTGIS,LEP,TNFSF13B,ESR1,BDNF,AGTR1
GO: Biological Process	GO:0051240	positive regulation of multicellular organismal process	6.719e-12	20	1610	GATA2,SOX17,NGF,PTN,PLCB1,AIF1,CCL2,C3,LPAR3,THBS1,CSF1R,FOXA2,FST,PAX8,NTF3,PTGIS,LEP,BDNF,AGTR1,NRP2
GO: Biological Process	GO:0042127	regulation of cell proliferation	1.26e-11	20	1666	GATA2,SOX17,NGF,PTN,AIF1,CCL2,IRF6,THBS1,HTRA1,CSF1R,PEMT,NTF3,LEP,TNFSF13B,PTH1R,ESR1,BDNF,PGR,AGTR1,NRP2
GO: Biological Process	GO:2000026	regulation of multicellular organismal development	1.291e-10	20	1893	GATA2,SOX17,NGF,PTN,PLCB1,CCL2,C3,LPAR3,THBS1,CSF1R,FOXA2,DCN,FST,PAX8,NTF3,PTGIS,LEP,ESR1,BDNF,AGTR1
GO: Biological Process	GO:0009887	animal organ morphogenesis	2.704e-10	16	1121	GATA2,SOX17,PTN,CCL2,THBS1,HTRA1,CSF1R,FOXA2,DCN,FST,PAX8,ESR1,BDNF,PGR,AGTR1,NRP2
GO: Biological Process	GO:0045597	positive regulation of cell differentiation	3.702e-10	15	966	GATA2,MSR1,SOX17,NGF,PTN,PLCB1,PLA2G2A,LPAR3,CSF1R,FOXA2,PAX8,NTF3,LEP,BDNF,AGTR1
GO: Biological Process	GO:0008284	positive regulation of cell proliferation	2.346e-09	14	924	NGF,PTN,AIF1,CCL2,HTRA1,CSF1R,NTF3,LEP,TNFSF13B,PTH1R,ESR1,PGR,AGTR1,NRP2
GO: Biological Process	GO:0016477	cell migration	2.356e-09	16	1300	GATA2,SOX17,PTN,PLCB1,AIF1,CCL2,CXCL16,THBS1,CSF1R,EMX2,DCN,NTF3,LEP,PGR,AGTR1,NRP2
GO: Biological Process	GO:0042325	regulation of phosphorylation	2.356e-09	17	1510	NGF,PLCB1,AIF1,PLA2G2A,CCL2,C3,LPAR3,THBS1,CSF1R,FOXA2,DCN,NTF3,LEP,ESR1,BDNF,DIRAS3,AGTR1
GO: Biological Process	GO:0019220	regulation of phosphate metabolic process	2.871e-09	18	1756	NGF,PLCB1,AIF1,PLA2G2A,CCL2,C3,LPAR3,THBS1,CSF1R,FOXA2,DCN,NTF3,LEP,PTH1R,ESR1,BDNF,DIRAS3,AGTR1
GO: Biological Process	GO:0045937	positive regulation of phosphate metabolic process	3.058e-09	15	1126	NGF,PLCB1,AIF1,PLA2G2A,CCL2,C3,LPAR3,THBS1,CSF1R,NTF3,LEP,PTH1R,ESR1,BDNF,AGTR1
GO: Biological Process	GO:0010562	positive regulation of phosphorus metabolic process	3.058e-09	15	1126	NGF,PLCB1,AIF1,PLA2G2A,CCL2,C3,LPAR3,THBS1,CSF1R,NTF3,LEP,PTH1R,ESR1,BDNF,AGTR1
GO: Biological Process	GO:0051174	regulation of phosphorus metabolic process	3.231e-09	18	1769	NGF,PLCB1,AIF1,PLA2G2A,CCL2,C3,LPAR3,THBS1,CSF1R,FOXA2,DCN,NTF3,LEP,PTH1R,ESR1,BDNF,DIRAS3,AGTR1
GO: Biological Process	GO:0001934	positive regulation of protein phosphorylation	3.784e-09	14	959	NGF,PLCB1,AIF1,PLA2G2A,CCL2,C3,LPAR3,THBS1,CSF1R,NTF3,LEP,ESR1,BDNF,AGTR1
GO: Biological Process	GO:0050673	epithelial cell proliferation	5.483e-09	10	391	PTN,CCL2,IRF6,THBS1,HTRA1,FST,LEP,ESR1,PGR,NRP2
GO: Biological Process	GO:0043410	positive regulation of MAPK cascade	6.222e-09	11	522	NGF,PLCB1,PLA2G2A,CCL2,C3,LPAR3,THBS1,CSF1R,NTF3,LEP,ESR1
GO: Biological Process	GO:0042327	positive regulation of phosphorylation	6.723e-09	14	1003	NGF,PLCB1,AIF1,PLA2G2A,CCL2,C3,LPAR3,THBS1,CSF1R,NTF3,LEP,ESR1,BDNF,AGTR1
GO: Biological Process	GO:0001932	regulation of protein phosphorylation	7.142e-09	16	1404	NGF,PLCB1,AIF1,PLA2G2A,CCL2,C3,LPAR3,THBS1,CSF1R,DCN,NTF3,LEP,ESR1,BDNF,DIRAS3,AGTR1
GO: Biological Process	GO:0007167	enzyme linked receptor protein signaling pathway	7.924e-09	14	1016	NGF,PTN,PLCB1,CCL2,THBS1,HTRA1,CSF1R,DCN,FST,NTF3,LEP,ESR1,BDNF,NRP2
GO: Biological Process	GO:0006928	movement of cell or subcellular component	8.675e-09	18	1882	GATA2,SOX17,NGF,PTN,PLCB1,AIF1,CCL2,CXCL16,THBS1,CSF1R,EMX2,DCN,NTF3,LEP,BDNF,PGR,AGTR1,NRP2
GO: Biological Process	GO:0051674	localization of cell	9.105e-09	16	1428	GATA2,SOX17,PTN,PLCB1,AIF1,CCL2,CXCL16,THBS1,CSF1R,EMX2,DCN,NTF3,LEP,PGR,AGTR1,NRP2
GO: Biological Process	GO:0048870	cell motility	9.105e-09	16	1428	GATA2,SOX17,PTN,PLCB1,AIF1,CCL2,CXCL16,THBS1,CSF1R,EMX2,DCN,NTF3,LEP,PGR,AGTR1,NRP2
GO: Biological Process	GO:0023056	positive regulation of signaling	1.01e-08	17	1662	NGF,PTN,PLCB1,PLA2G2A,CCL2,C3,LPAR3,THBS1,CSF1R,FOXA2,DCN,NTF3,PTGIS,LEP,ESR1,BDNF,AGTR1
GO: Biological Process	GO:0010647	positive regulation of cell communication	1.231e-08	17	1684	NGF,PTN,PLCB1,PLA2G2A,CCL2,C3,LPAR3,THBS1,CSF1R,FOXA2,DCN,NTF3,PTGIS,LEP,ESR1,BDNF,AGTR1
GO: Biological Process	GO:0009891	positive regulation of biosynthetic process	1.636e-08	18	1959	GATA2,SOX17,NGF,PLCB1,HOXA10,AIF1,CCL2,IRF6,THBS1,PEMT,FOXA2,DCN,PAX8,NTF3,PTH1R,ESR1,BDNF,PGR
GO: Biological Process	GO:0009967	positive regulation of signal transduction	1.638e-08	16	1488	NGF,PLCB1,PLA2G2A,CCL2,C3,LPAR3,THBS1,CSF1R,FOXA2,DCN,NTF3,PTGIS,LEP,ESR1,BDNF,AGTR1
GO: Biological Process	GO:0040011	locomotion	1.926e-08	17	1735	GATA2,SOX17,PTN,PLCB1,AIF1,CCL2,CXCL16,THBS1,CSF1R,EMX2,DCN,NTF3,LEP,BDNF,PGR,AGTR1,NRP2
GO: Biological Process	GO:0040007	growth	1.958e-08	14	1091	SOX17,NGF,PLCB1,BNC2,C3,LPAR3,CXCL16,THBS1,HTRA1,LEP,ESR1,BDNF,AGTR1,NRP2
GO: Biological Process	GO:0001525	angiogenesis	2.785e-08	10	464	GATA2,SOX17,PTN,CCL2,C3,THBS1,DCN,PTGIS,LEP,NRP2
GO: Biological Process	GO:0045765	regulation of angiogenesis	2.857e-08	8	239	GATA2,PTN,CCL2,C3,THBS1,DCN,PTGIS,LEP
GO: Biological Process	GO:1902533	positive regulation of intracellular signal transduction	3.795e-08	13	958	NGF,PLCB1,PLA2G2A,CCL2,C3,LPAR3,THBS1,CSF1R,DCN,NTF3,LEP,ESR1,AGTR1
GO: Biological Process	GO:0001655	urogenital system development	3.844e-08	9	355	GATA2,SOX17,MME,EMX2,DCN,PAX8,ESR1,BDNF,AGTR1
GO: Biological Process	GO:0031399	regulation of protein modification process	4.661e-08	17	1841	GATA2,NGF,PLCB1,AIF1,PLA2G2A,CCL2,C3,LPAR3,THBS1,CSF1R,DCN,NTF3,LEP,ESR1,BDNF,DIRAS3,AGTR1
GO: Biological Process	GO:0051247	positive regulation of protein metabolic process	5.034e-08	16	1611	SOX17,NGF,PLCB1,AIF1,PLA2G2A,CCL2,C3,LPAR3,THBS1,CSF1R,PEMT,NTF3,LEP,ESR1,BDNF,AGTR1
GO: Biological Process	GO:0001568	blood vessel development	6.012e-08	11	651	GATA2,SOX17,PTN,CCL2,C3,THBS1,DCN,PTGIS,LEP,AGTR1,NRP2
GO: Biological Process	GO:1901342	regulation of vasculature development	6.17e-08	8	264	GATA2,PTN,CCL2,C3,THBS1,DCN,PTGIS,LEP
GO: Biological Process	GO:0034097	response to cytokine	6.831e-08	12	825	PLCB1,AIF1,CCL2,CXCL16,IRF6,MME,CSF1R,FOXA2,DCN,PTGIS,LEP,TNFSF13B
GO: Biological Process	GO:0032101	regulation of response to external stimulus	7.396e-08	13	1014	AIF1,PLA2G2A,CCL2,C3,THBS1,HTRA1,FOXA2,DCN,NTF3,PTGIS,LEP,ESR1,AGTR1
GO: Biological Process	GO:0033993	response to lipid	8.201e-08	13	1023	GATA2,PTN,AIF1,CCL2,C3,CXCL16,THBS1,DCN,LEP,ESR1,BDNF,PGR,AGTR1
GO: Biological Process	GO:0031328	positive regulation of cellular biosynthetic process	8.737e-08	17	1921	GATA2,SOX17,NGF,PLCB1,HOXA10,AIF1,IRF6,THBS1,PEMT,FOXA2,DCN,PAX8,NTF3,PTH1R,ESR1,BDNF,PGR
GO: Biological Process	GO:0031401	positive regulation of protein modification process	8.817e-08	14	1230	NGF,PLCB1,AIF1,PLA2G2A,CCL2,C3,LPAR3,THBS1,CSF1R,NTF3,LEP,ESR1,BDNF,AGTR1
GO: Biological Process	GO:0001944	vasculature development	8.945e-08	11	677	GATA2,SOX17,PTN,CCL2,C3,THBS1,DCN,PTGIS,LEP,AGTR1,NRP2
GO: Biological Process	GO:0035295	tube development	1.022e-07	11	686	GATA2,SOX17,PTN,RXFP1,CSF1R,FOXA2,PAX8,ESR1,BDNF,PGR,AGTR1
GO: Biological Process	GO:0045595	regulation of cell differentiation	1.059e-07	16	1699	GATA2,MSR1,SOX17,NGF,PTN,PLCB1,PLA2G2A,LPAR3,CSF1R,FOXA2,FST,PAX8,NTF3,LEP,BDNF,AGTR1
GO: Biological Process	GO:0007169	transmembrane receptor protein tyrosine kinase signaling pathway	1.254e-07	11	700	NGF,PLCB1,CCL2,THBS1,CSF1R,DCN,NTF3,LEP,ESR1,BDNF,NRP2
GO: Biological Process	GO:0048514	blood vessel morphogenesis	1.391e-07	10	551	GATA2,SOX17,PTN,CCL2,C3,THBS1,DCN,PTGIS,LEP,NRP2
GO: Biological Process	GO:0071495	cellular response to endogenous stimulus	1.418e-07	14	1278	NGF,PTN,PLCB1,AIF1,CCL2,THBS1,HTRA1,FST,PAX8,LEP,ESR1,BDNF,PGR,AGTR1
GO: Biological Process	GO:0009719	response to endogenous stimulus	1.476e-07	16	1740	NGF,PTN,PLCB1,AIF1,CCL2,C3,THBS1,HTRA1,PEMT,FST,PAX8,LEP,ESR1,BDNF,PGR,AGTR1
GO: Biological Process	GO:0008285	negative regulation of cell proliferation	1.531e-07	11	714	GATA2,PTN,AIF1,CCL2,IRF6,THBS1,CSF1R,PEMT,PTH1R,ESR1,BDNF
GO: Biological Process	GO:0060429	epithelium development	1.686e-07	14	1296	SOX17,PTN,IRF6,CLDN3,TAGLN,CSF1R,FOXA2,FST,PAX8,NTF3,ESR1,BDNF,PGR,AGTR1
GO: Biological Process	GO:0042981	regulation of apoptotic process	1.686e-07	15	1519	NGF,PTN,AIF1,CCL2,BNC2,THBS1,CSF1R,PAX8,NTF3,PTGIS,LEP,ESR1,BDNF,PGR,AGTR1
GO: Biological Process	GO:0048646	anatomical structure formation involved in morphogenesis	1.734e-07	14	1299	GATA2,SOX17,PTN,CCL2,C3,THBS1,HTRA1,FOXA2,DCN,PAX8,PTGIS,LEP,TNFSF13B,NRP2
GO: Biological Process	GO:0043067	regulation of programmed cell death	1.95e-07	15	1536	NGF,PTN,AIF1,CCL2,BNC2,THBS1,CSF1R,PAX8,NTF3,PTGIS,LEP,ESR1,BDNF,PGR,AGTR1
GO: Biological Process	GO:0043408	regulation of MAPK cascade	2.048e-07	11	735	NGF,PLCB1,PLA2G2A,CCL2,C3,LPAR3,THBS1,CSF1R,NTF3,LEP,ESR1
GO: Biological Process	GO:0048545	response to steroid hormone	2.132e-07	10	577	PTN,AIF1,CCL2,C3,THBS1,LEP,ESR1,BDNF,PGR,AGTR1
GO: Biological Process	GO:0030334	regulation of cell migration	2.252e-07	11	742	PTN,PLCB1,AIF1,CCL2,CXCL16,THBS1,CSF1R,DCN,NTF3,PGR,NRP2
GO: Biological Process	GO:0050678	regulation of epithelial cell proliferation	2.893e-07	8	323	PTN,CCL2,THBS1,HTRA1,LEP,ESR1,PGR,NRP2
GO: Biological Process	GO:0032103	positive regulation of response to external stimulus	3.252e-07	8	328	AIF1,PLA2G2A,CCL2,C3,THBS1,DCN,NTF3,AGTR1
GO: Biological Process	GO:0009611	response to wounding	3.816e-07	12	967	GATA2,AIF1,PLA2G2A,CCL2,C3,THBS1,FOXA2,DCN,PTGIS,LEP,ESR1,AGTR1
GO: Biological Process	GO:1903034	regulation of response to wounding	4.311e-07	9	472	PLA2G2A,CCL2,C3,THBS1,FOXA2,PTGIS,LEP,ESR1,AGTR1
GO: Biological Process	GO:2000145	regulation of cell motility	4.373e-07	11	793	PTN,PLCB1,AIF1,CCL2,CXCL16,THBS1,CSF1R,DCN,NTF3,PGR,NRP2
GO: Biological Process	GO:0010941	regulation of cell death	4.945e-07	15	1650	NGF,PTN,AIF1,CCL2,BNC2,THBS1,CSF1R,PAX8,NTF3,PTGIS,LEP,ESR1,BDNF,PGR,AGTR1
GO: Biological Process	GO:0048608	reproductive structure development	5.228e-07	9	483	GATA2,HOXA10,HTRA1,DCN,FST,PTGIS,LEP,ESR1,PGR
GO: Biological Process	GO:0060548	negative regulation of cell death	5.521e-07	12	1001	NGF,AIF1,CCL2,THBS1,CSF1R,PAX8,NTF3,LEP,ESR1,BDNF,PGR,AGTR1
GO: Biological Process	GO:0061458	reproductive system development	5.601e-07	9	487	GATA2,HOXA10,HTRA1,DCN,FST,PTGIS,LEP,ESR1,PGR
GO: Biological Process	GO:0006468	protein phosphorylation	7.148e-07	16	1952	NGF,PLCB1,AIF1,PLA2G2A,CCL2,C3,LPAR3,THBS1,CSF1R,DCN,NTF3,LEP,ESR1,BDNF,DIRAS3,AGTR1
GO: Biological Process	GO:0009725	response to hormone	7.718e-07	12	1033	PTN,PLCB1,AIF1,CCL2,C3,THBS1,PAX8,LEP,ESR1,BDNF,PGR,AGTR1
GO: Biological Process	GO:0048589	developmental growth	8.743e-07	10	673	NGF,PLCB1,BNC2,C3,LPAR3,THBS1,LEP,ESR1,BDNF,NRP2
GO: Biological Process	GO:0051270	regulation of cellular component movement	9.753e-07	11	860	PTN,PLCB1,AIF1,CCL2,CXCL16,THBS1,CSF1R,DCN,NTF3,PGR,NRP2
GO: Biological Process	GO:0022414	reproductive process	1.028e-06	14	1503	GATA2,SOX17,PTN,PLCB1,HOXA10,CCL2,HTRA1,RXFP1,DCN,FST,PTGIS,LEP,ESR1,PGR
GO: Biological Process	GO:0000003	reproduction	1.044e-06	14	1505	GATA2,SOX17,PTN,PLCB1,HOXA10,CCL2,HTRA1,RXFP1,DCN,FST,PTGIS,LEP,ESR1,PGR
GO: Biological Process	GO:0040012	regulation of locomotion	1.044e-06	11	866	PTN,PLCB1,AIF1,CCL2,CXCL16,THBS1,CSF1R,DCN,NTF3,PGR,NRP2
GO: Biological Process	GO:0032270	positive regulation of cellular protein metabolic process	1.104e-06	14	1512	NGF,PLCB1,AIF1,PLA2G2A,CCL2,C3,LPAR3,THBS1,CSF1R,NTF3,LEP,ESR1,BDNF,AGTR1
GO: Biological Process	GO:0001890	placenta development	1.131e-06	6	165	GATA2,HTRA1,DCN,PTGIS,LEP,ESR1
GO: Biological Process	GO:0010557	positive regulation of macromolecule biosynthetic process	1.279e-06	15	1777	GATA2,SOX17,NGF,PLCB1,HOXA10,CCL2,IRF6,THBS1,FOXA2,DCN,PAX8,NTF3,ESR1,BDNF,PGR
GO: Biological Process	GO:0048672	positive regulation of collateral sprouting	1.385e-06	3	11	NGF,LPAR3,BDNF
GO: Biological Process	GO:0045927	positive regulation of growth	1.422e-06	7	274	NGF,PLCB1,C3,LPAR3,CXCL16,LEP,BDNF
GO: Biological Process	GO:0006954	inflammatory response	1.438e-06	10	711	AIF1,PLA2G2A,CCL2,C3,THBS1,CSF1R,PTGIS,LEP,ESR1,AGTR1
GO: Biological Process	GO:0071345	cellular response to cytokine stimulus	1.475e-06	10	713	PLCB1,AIF1,CCL2,IRF6,MME,CSF1R,DCN,PTGIS,LEP,TNFSF13B
GO: Biological Process	GO:0043066	negative regulation of apoptotic process	1.608e-06	11	905	NGF,AIF1,CCL2,THBS1,CSF1R,PAX8,NTF3,LEP,BDNF,PGR,AGTR1
GO: Biological Process	GO:0040008	regulation of growth	1.611e-06	10	720	SOX17,NGF,PLCB1,C3,LPAR3,CXCL16,HTRA1,LEP,BDNF,AGTR1
GO: Biological Process	GO:2000377	regulation of reactive oxygen species metabolic process	1.703e-06	6	177	AIF1,THBS1,PTGIS,LEP,ESR1,AGTR1
GO: Biological Process	GO:0051093	negative regulation of developmental process	1.771e-06	11	914	GATA2,SOX17,PTN,CCL2,THBS1,FOXA2,DCN,FST,PAX8,LEP,BDNF
GO: Biological Process	GO:0003006	developmental process involved in reproduction	1.78e-06	10	728	GATA2,PLCB1,HOXA10,HTRA1,DCN,FST,PTGIS,LEP,ESR1,PGR
GO: Biological Process	GO:0016049	cell growth	1.838e-06	9	562	SOX17,NGF,LPAR3,CXCL16,HTRA1,ESR1,BDNF,AGTR1,NRP2
GO: Biological Process	GO:0043069	negative regulation of programmed cell death	1.868e-06	11	919	NGF,AIF1,CCL2,THBS1,CSF1R,PAX8,NTF3,LEP,BDNF,PGR,AGTR1
GO: Biological Process	GO:0048639	positive regulation of developmental growth	2.002e-06	6	182	NGF,PLCB1,C3,LPAR3,LEP,BDNF
GO: Biological Process	GO:0000165	MAPK cascade	2.054e-06	11	928	NGF,PLCB1,PLA2G2A,CCL2,C3,LPAR3,THBS1,CSF1R,NTF3,LEP,ESR1
GO: Biological Process	GO:2000379	positive regulation of reactive oxygen species metabolic process	2.112e-06	5	101	AIF1,THBS1,LEP,ESR1,AGTR1
GO: Biological Process	GO:0006935	chemotaxis	2.218e-06	9	575	AIF1,CCL2,CXCL16,THBS1,CSF1R,NTF3,BDNF,AGTR1,NRP2
GO: Biological Process	GO:0042330	taxis	2.283e-06	9	577	AIF1,CCL2,CXCL16,THBS1,CSF1R,NTF3,BDNF,AGTR1,NRP2
GO: Biological Process	GO:1901700	response to oxygen-containing compound	2.41e-06	14	1614	PTN,PLCB1,AIF1,CCL2,C3,CXCL16,THBS1,PEMT,FOXA2,DCN,LEP,ESR1,PGR,AGTR1
GO: Biological Process	GO:0048729	tissue morphogenesis	2.681e-06	10	762	SOX17,PTN,CSF1R,FOXA2,FST,PAX8,ESR1,PGR,AGTR1,NRP2
GO: Biological Process	GO:0010628	positive regulation of gene expression	2.789e-06	15	1890	GATA2,SOX17,NGF,PLCB1,HOXA10,C3,IRF6,THBS1,FOXA2,DCN,PAX8,NTF3,ESR1,BDNF,PGR
GO: Biological Process	GO:0023014	signal transduction by protein phosphorylation	2.912e-06	11	962	NGF,PLCB1,PLA2G2A,CCL2,C3,LPAR3,THBS1,CSF1R,NTF3,LEP,ESR1
GO: Biological Process	GO:0006952	defense response	3.153e-06	14	1651	AIF1,PLA2G2A,CCL2,C3,CXCL16,IRF6,THBS1,HTRA1,CSF1R,PTGIS,LEP,ESR1,BDNF,AGTR1
GO: Biological Process	GO:0072001	renal system development	3.155e-06	7	309	SOX17,MME,EMX2,DCN,PAX8,BDNF,AGTR1
GO: Biological Process	GO:0030335	positive regulation of cell migration	3.205e-06	8	445	AIF1,CCL2,CXCL16,THBS1,CSF1R,NTF3,PGR,NRP2
GO: Biological Process	GO:0006915	apoptotic process	3.465e-06	15	1923	NGF,PTN,AIF1,CCL2,BNC2,THBS1,CSF1R,PAX8,NTF3,PTGIS,LEP,ESR1,BDNF,PGR,AGTR1
GO: Biological Process	GO:0032570	response to progesterone	3.528e-06	4	50	PTN,CCL2,C3,THBS1
GO: Biological Process	GO:0010744	positive regulation of macrophage derived foam cell differentiation	3.797e-06	3	15	MSR1,PLA2G2A,AGTR1
GO: Biological Process	GO:1901215	negative regulation of neuron death	3.875e-06	6	204	NGF,CCL2,NTF3,ESR1,BDNF,AGTR1
GO: Biological Process	GO:2000147	positive regulation of cell motility	3.964e-06	8	458	AIF1,CCL2,CXCL16,THBS1,CSF1R,NTF3,PGR,NRP2
GO: Biological Process	GO:0051173	positive regulation of nitrogen compound metabolic process	3.969e-06	15	1944	GATA2,SOX17,NGF,PLCB1,HOXA10,AIF1,IRF6,THBS1,FOXA2,DCN,PAX8,NTF3,ESR1,BDNF,PGR
GO: Biological Process	GO:0012501	programmed cell death	4.177e-06	15	1952	NGF,PTN,AIF1,CCL2,BNC2,THBS1,CSF1R,PAX8,NTF3,PTGIS,LEP,ESR1,BDNF,PGR,AGTR1
GO: Biological Process	GO:0051272	positive regulation of cellular component movement	4.796e-06	8	470	AIF1,CCL2,CXCL16,THBS1,CSF1R,NTF3,PGR,NRP2
GO: Biological Process	GO:0051049	regulation of transport	4.833e-06	15	1975	GATA2,NGF,PLCB1,CCL2,C3,LPAR3,THBS1,CSF1R,PEMT,FOXA2,PAX8,NTF3,LEP,ESR1,AGTR1
GO: Biological Process	GO:0007267	cell-cell signaling	4.926e-06	12	1233	NGF,PTN,PLCB1,CCL2,LPAR3,FOXA2,PAX8,NTF3,LEP,BDNF,PGR,AGTR1
GO: Biological Process	GO:0040017	positive regulation of locomotion	5.346e-06	8	477	AIF1,CCL2,CXCL16,THBS1,CSF1R,NTF3,PGR,NRP2
GO: Biological Process	GO:0050727	regulation of inflammatory response	6.03e-06	7	341	PLA2G2A,CCL2,C3,PTGIS,LEP,ESR1,AGTR1
GO: Biological Process	GO:0051130	positive regulation of cellular component organization	6.309e-06	12	1263	GATA2,NGF,PTN,PLCB1,CCL2,C3,LPAR3,PEMT,DCN,PAX8,NTF3,BDNF
GO: Biological Process	GO:0000904	cell morphogenesis involved in differentiation	6.375e-06	10	840	SOX17,NGF,LPAR3,CLDN3,CSF1R,FOXA2,PAX8,NTF3,BDNF,NRP2
GO: Biological Process	GO:0014070	response to organic cyclic compound	6.454e-06	11	1045	MSR1,PTN,AIF1,CCL2,C3,THBS1,LEP,ESR1,BDNF,PGR,AGTR1
GO: Biological Process	GO:0043549	regulation of kinase activity	6.51e-06	10	842	NGF,LPAR3,THBS1,CSF1R,FOXA2,DCN,NTF3,LEP,DIRAS3,AGTR1
GO: Biological Process	GO:0030336	negative regulation of cell migration	6.631e-06	6	224	PTN,PLCB1,AIF1,CCL2,THBS1,DCN
GO: Biological Process	GO:0030855	epithelial cell differentiation	6.989e-06	9	662	SOX17,PTN,IRF6,CLDN3,TAGLN,FOXA2,PAX8,ESR1,PGR
GO: Biological Process	GO:0006897	endocytosis	7.248e-06	9	665	GATA2,MSR1,AIF1,CCL2,C3,CXCL16,THBS1,NTF3,LEP
GO: Biological Process	GO:0072359	circulatory system development	7.263e-06	11	1058	GATA2,SOX17,PTN,CCL2,C3,THBS1,DCN,PTGIS,LEP,AGTR1,NRP2
GO: Biological Process	GO:0072358	cardiovascular system development	7.263e-06	11	1058	GATA2,SOX17,PTN,CCL2,C3,THBS1,DCN,PTGIS,LEP,AGTR1,NRP2
GO: Biological Process	GO:1903508	positive regulation of nucleic acid-templated transcription	7.751e-06	13	1528	GATA2,SOX17,NGF,PLCB1,HOXA10,IRF6,FOXA2,DCN,PAX8,NTF3,ESR1,BDNF,PGR
GO: Biological Process	GO:0045893	positive regulation of transcription, DNA-templated	7.751e-06	13	1528	GATA2,SOX17,NGF,PLCB1,HOXA10,IRF6,FOXA2,DCN,PAX8,NTF3,ESR1,BDNF,PGR
GO: Biological Process	GO:0007610	behavior	7.793e-06	9	671	NGF,PTN,PLCB1,THBS1,FOXA2,LEP,BDNF,PGR,AGTR1
GO: Biological Process	GO:0048732	gland development	8e-06	8	504	GATA2,PTN,IRF6,RXFP1,CSF1R,PAX8,ESR1,PGR
GO: Biological Process	GO:0032870	cellular response to hormone stimulus	8.372e-06	9	677	PLCB1,AIF1,CCL2,PAX8,LEP,ESR1,BDNF,PGR,AGTR1
GO: Biological Process	GO:2000146	negative regulation of cell motility	8.722e-06	6	235	PTN,PLCB1,AIF1,CCL2,THBS1,DCN
GO: Biological Process	GO:1902680	positive regulation of RNA biosynthetic process	8.808e-06	13	1546	GATA2,SOX17,NGF,PLCB1,HOXA10,IRF6,FOXA2,DCN,PAX8,NTF3,ESR1,BDNF,PGR
GO: Biological Process	GO:0043523	regulation of neuron apoptotic process	8.936e-06	6	236	NGF,CCL2,NTF3,ESR1,BDNF,AGTR1
GO: Biological Process	GO:0032940	secretion by cell	9.641e-06	11	1090	GATA2,NGF,PLCB1,THBS1,CSF1R,FOXA2,PAX8,LEP,TNFSF13B,BDNF,AGTR1
GO: Biological Process	GO:0048609	multicellular organismal reproductive process	1.029e-05	10	887	SOX17,PTN,PLCB1,HOXA10,CCL2,FST,PTGIS,LEP,ESR1,PGR
GO: Biological Process	GO:0060562	epithelial tube morphogenesis	1.082e-05	7	373	SOX17,CSF1R,FOXA2,PAX8,ESR1,PGR,AGTR1
GO: Biological Process	GO:0000902	cell morphogenesis	1.128e-05	12	1337	SOX17,NGF,PTN,CCL2,LPAR3,CLDN3,CSF1R,FOXA2,PAX8,NTF3,BDNF,NRP2
GO: Biological Process	GO:0032504	multicellular organism reproduction	1.168e-05	10	900	SOX17,PTN,PLCB1,HOXA10,CCL2,FST,PTGIS,LEP,ESR1,PGR
GO: Biological Process	GO:0060135	maternal process involved in female pregnancy	1.214e-05	4	68	CCL2,PTGIS,ESR1,PGR
GO: Biological Process	GO:0051254	positive regulation of RNA metabolic process	1.22e-05	13	1593	GATA2,SOX17,NGF,PLCB1,HOXA10,IRF6,FOXA2,DCN,PAX8,NTF3,ESR1,BDNF,PGR
GO: Biological Process	GO:0044706	multi-multicellular organism process	1.241e-05	6	250	CCL2,RXFP1,PTGIS,LEP,ESR1,PGR
GO: Biological Process	GO:0048670	regulation of collateral sprouting	1.272e-05	3	22	NGF,LPAR3,BDNF
GO: Biological Process	GO:0006909	phagocytosis	1.388e-05	6	255	GATA2,AIF1,CCL2,C3,THBS1,LEP
GO: Biological Process	GO:0030879	mammary gland development	1.561e-05	5	152	IRF6,RXFP1,CSF1R,ESR1,PGR
GO: Biological Process	GO:0051402	neuron apoptotic process	1.584e-05	6	261	NGF,CCL2,NTF3,ESR1,BDNF,AGTR1
GO: Biological Process	GO:0072593	reactive oxygen species metabolic process	1.618e-05	6	262	AIF1,THBS1,PTGIS,LEP,ESR1,AGTR1
GO: Biological Process	GO:0097305	response to alcohol	1.646e-05	7	398	PTN,CCL2,C3,PEMT,LEP,ESR1,AGTR1
GO: Biological Process	GO:0071407	cellular response to organic cyclic compound	1.74e-05	8	561	MSR1,PTN,AIF1,CCL2,ESR1,BDNF,PGR,AGTR1
GO: Biological Process	GO:0051271	negative regulation of cellular component movement	1.839e-05	6	268	PTN,PLCB1,AIF1,CCL2,THBS1,DCN
GO: Biological Process	GO:2000027	regulation of animal organ morphogenesis	1.839e-05	6	268	SOX17,PTN,PAX8,ESR1,BDNF,AGTR1
GO: Biological Process	GO:0098868	bone growth	1.892e-05	3	25	BNC2,THBS1,LEP
GO: Biological Process	GO:0043524	negative regulation of neuron apoptotic process	1.94e-05	5	159	NGF,CCL2,NTF3,BDNF,AGTR1
GO: Biological Process	GO:0010720	positive regulation of cell development	2.001e-05	8	572	GATA2,NGF,PTN,LPAR3,FOXA2,PAX8,NTF3,BDNF
GO: Biological Process	GO:0071396	cellular response to lipid	2.001e-05	8	572	PTN,CCL2,CXCL16,LEP,ESR1,BDNF,PGR,AGTR1
GO: Biological Process	GO:0006874	cellular calcium ion homeostasis	2.025e-05	7	411	GATA2,NGF,CCL2,LPAR3,PTH1R,ESR1,AGTR1
GO: Biological Process	GO:0021700	developmental maturation	2.127e-05	6	275	GATA2,NGF,PLCB1,LEP,PTH1R,PGR
GO: Biological Process	GO:0035239	tube morphogenesis	2.155e-05	7	415	SOX17,CSF1R,FOXA2,PAX8,ESR1,PGR,AGTR1
GO: Biological Process	GO:0032989	cellular component morphogenesis	2.224e-05	12	1430	SOX17,NGF,PTN,CCL2,LPAR3,CLDN3,CSF1R,FOXA2,PAX8,NTF3,BDNF,NRP2
GO: Biological Process	GO:0001819	positive regulation of cytokine production	2.257e-05	7	418	PLCB1,CCL2,C3,THBS1,CSF1R,LEP,AGTR1
GO: Biological Process	GO:0061180	mammary gland epithelium development	2.316e-05	4	80	IRF6,CSF1R,ESR1,PGR
GO: Biological Process	GO:0007204	positive regulation of cytosolic calcium ion concentration	2.354e-05	6	280	GATA2,NGF,LPAR3,PTH1R,ESR1,AGTR1
GO: Biological Process	GO:0045859	regulation of protein kinase activity	2.46e-05	9	775	NGF,LPAR3,THBS1,CSF1R,DCN,NTF3,LEP,DIRAS3,AGTR1
GO: Biological Process	GO:1901698	response to nitrogen compound	2.466e-05	10	981	PTN,PLCB1,AIF1,CCL2,THBS1,PEMT,LEP,ESR1,PGR,AGTR1
GO: Biological Process	GO:0045785	positive regulation of cell adhesion	2.51e-05	7	425	PTN,AIF1,CCL2,THBS1,FOXA2,LEP,TNFSF13B
GO: Biological Process	GO:0055074	calcium ion homeostasis	2.51e-05	7	425	GATA2,NGF,CCL2,LPAR3,PTH1R,ESR1,AGTR1
GO: Biological Process	GO:0010743	regulation of macrophage derived foam cell differentiation	2.683e-05	3	28	MSR1,PLA2G2A,AGTR1
GO: Biological Process	GO:0072503	cellular divalent inorganic cation homeostasis	2.913e-05	7	435	GATA2,NGF,CCL2,LPAR3,PTH1R,ESR1,AGTR1
GO: Biological Process	GO:1901701	cellular response to oxygen-containing compound	2.933e-05	10	1001	PTN,PLCB1,AIF1,CCL2,CXCL16,THBS1,FOXA2,LEP,ESR1,AGTR1
GO: Biological Process	GO:0016525	negative regulation of angiogenesis	2.943e-05	4	85	PTN,CCL2,THBS1,DCN
GO: Biological Process	GO:0046903	secretion	2.948e-05	11	1228	GATA2,NGF,PLCB1,THBS1,CSF1R,FOXA2,PAX8,LEP,TNFSF13B,BDNF,AGTR1
GO: Biological Process	GO:0007417	central nervous system development	2.959e-05	10	1002	GATA2,PTN,PLCB1,CSF1R,FOXA2,EMX2,PAX8,NTF3,LEP,NRP2
GO: Biological Process	GO:0051338	regulation of transferase activity	3.061e-05	10	1006	NGF,LPAR3,THBS1,CSF1R,FOXA2,DCN,NTF3,LEP,DIRAS3,AGTR1
GO: Biological Process	GO:0050679	positive regulation of epithelial cell proliferation	3.076e-05	5	175	PTN,CCL2,HTRA1,ESR1,NRP2
GO: Biological Process	GO:0040013	negative regulation of locomotion	3.096e-05	6	294	PTN,PLCB1,AIF1,CCL2,THBS1,DCN
GO: Biological Process	GO:0002009	morphogenesis of an epithelium	3.135e-05	8	609	SOX17,CSF1R,FOXA2,FST,PAX8,ESR1,PGR,AGTR1
GO: Biological Process	GO:0022604	regulation of cell morphogenesis	3.135e-05	8	609	NGF,PTN,CCL2,LPAR3,CSF1R,FOXA2,PAX8,BDNF
GO: Biological Process	GO:0048469	cell maturation	3.161e-05	5	176	GATA2,NGF,PLCB1,PTH1R,PGR
GO: Biological Process	GO:0048668	collateral sprouting	3.315e-05	3	30	NGF,LPAR3,BDNF
GO: Biological Process	GO:0001558	regulation of cell growth	3.368e-05	7	445	SOX17,NGF,LPAR3,CXCL16,HTRA1,BDNF,AGTR1
GO: Biological Process	GO:2000181	negative regulation of blood vessel morphogenesis	3.374e-05	4	88	PTN,CCL2,THBS1,DCN
GO: Biological Process	GO:0042592	homeostatic process	3.7e-05	13	1767	GATA2,NGF,PLCB1,CCL2,LPAR3,CSF1R,FOXA2,DCN,LEP,TNFSF13B,PTH1R,ESR1,AGTR1
GO: Biological Process	GO:0051480	regulation of cytosolic calcium ion concentration	3.873e-05	6	306	GATA2,NGF,LPAR3,PTH1R,ESR1,AGTR1
GO: Biological Process	GO:0048754	branching morphogenesis of an epithelial tube	3.909e-05	5	184	FOXA2,PAX8,ESR1,PGR,AGTR1
GO: Biological Process	GO:1901214	regulation of neuron death	3.944e-05	6	307	NGF,CCL2,NTF3,ESR1,BDNF,AGTR1
GO: Biological Process	GO:1902531	regulation of intracellular signal transduction	4.021e-05	13	1781	NGF,PLCB1,PLA2G2A,CCL2,C3,LPAR3,THBS1,CSF1R,DCN,NTF3,LEP,ESR1,AGTR1
GO: Biological Process	GO:0048585	negative regulation of response to stimulus	4.028e-05	12	1518	GATA2,SOX17,AIF1,CCL2,THBS1,HTRA1,FOXA2,DCN,FST,PTGIS,LEP,ESR1
GO: Biological Process	GO:0010742	macrophage derived foam cell differentiation	4.038e-05	3	32	MSR1,PLA2G2A,AGTR1
GO: Biological Process	GO:0070741	response to interleukin-6	4.038e-05	3	32	CCL2,FOXA2,PTGIS
GO: Biological Process	GO:0072507	divalent inorganic cation homeostasis	4.044e-05	7	458	GATA2,NGF,CCL2,LPAR3,PTH1R,ESR1,AGTR1
GO: Biological Process	GO:0044703	multi-organism reproductive process	4.066e-05	10	1040	SOX17,PLCB1,HOXA10,CCL2,RXFP1,FST,PTGIS,LEP,ESR1,PGR
GO: Biological Process	GO:0001666	response to hypoxia	4.316e-05	6	312	PTN,CCL2,THBS1,CLDN3,PTGIS,LEP
GO: Biological Process	GO:1903036	positive regulation of response to wounding	4.332e-05	5	188	PLA2G2A,CCL2,C3,THBS1,AGTR1
GO: Biological Process	GO:0007200	phospholipase C-activating G protein-coupled receptor signaling pathway	4.373e-05	4	94	LPAR3,PTH1R,ESR1,AGTR1
GO: Biological Process	GO:1901343	negative regulation of vasculature development	4.373e-05	4	94	PTN,CCL2,THBS1,DCN
GO: Biological Process	GO:0090077	foam cell differentiation	4.436e-05	3	33	MSR1,PLA2G2A,AGTR1
GO: Biological Process	GO:0097696	STAT cascade	4.443e-05	5	189	CCL2,CSF1R,DCN,LEP,AGTR1
GO: Biological Process	GO:0007259	JAK-STAT cascade	4.443e-05	5	189	CCL2,CSF1R,DCN,LEP,AGTR1
GO: Biological Process	GO:0050769	positive regulation of neurogenesis	4.453e-05	7	465	GATA2,NGF,PTN,LPAR3,FOXA2,NTF3,BDNF
GO: Biological Process	GO:0070374	positive regulation of ERK1 and ERK2 cascade	4.556e-05	5	190	PLA2G2A,CCL2,C3,CSF1R,ESR1
GO: Biological Process	GO:0071363	cellular response to growth factor stimulus	4.61e-05	8	643	NGF,PTN,CCL2,THBS1,HTRA1,DCN,FST,NRP2
GO: Biological Process	GO:0032147	activation of protein kinase activity	4.633e-05	6	316	NGF,LPAR3,THBS1,NTF3,LEP,AGTR1
GO: Biological Process	GO:0032102	negative regulation of response to external stimulus	4.715e-05	6	317	AIF1,CCL2,THBS1,HTRA1,PTGIS,LEP
GO: Biological Process	GO:0051050	positive regulation of transport	4.819e-05	10	1061	GATA2,PLCB1,CCL2,C3,LPAR3,CSF1R,PEMT,NTF3,LEP,AGTR1
GO: Biological Process	GO:0036293	response to decreased oxygen levels	5.056e-05	6	321	PTN,CCL2,THBS1,CLDN3,PTGIS,LEP
GO: Biological Process	GO:0045935	positive regulation of nucleobase-containing compound metabolic process	5.41e-05	13	1832	GATA2,SOX17,NGF,PLCB1,HOXA10,IRF6,FOXA2,DCN,PAX8,NTF3,ESR1,BDNF,PGR
GO: Biological Process	GO:0043277	apoptotic cell clearance	5.78e-05	3	36	CCL2,C3,THBS1
GO: Biological Process	GO:0080134	regulation of response to stress	5.933e-05	12	1579	PLCB1,PLA2G2A,CCL2,C3,THBS1,HTRA1,FOXA2,DCN,PTGIS,LEP,ESR1,AGTR1
GO: Biological Process	GO:1901654	response to ketone	5.954e-05	5	201	PTN,CCL2,C3,THBS1,AGTR1
GO: Biological Process	GO:0070848	response to growth factor	6.227e-05	8	671	NGF,PTN,CCL2,THBS1,HTRA1,DCN,FST,NRP2
GO: Biological Process	GO:0001936	regulation of endothelial cell proliferation	6.255e-05	4	103	CCL2,THBS1,LEP,NRP2
GO: Biological Process	GO:0060745	mammary gland branching involved in pregnancy	6.376e-05	2	6	ESR1,PGR
GO: Biological Process	GO:0007389	pattern specification process	6.608e-05	7	495	SOX17,HOXA10,FOXA2,EMX2,FST,PAX8,NRP2
GO: Biological Process	GO:0045860	positive regulation of protein kinase activity	6.693e-05	7	496	NGF,LPAR3,THBS1,CSF1R,NTF3,LEP,AGTR1
GO: Biological Process	GO:0070482	response to oxygen levels	6.73e-05	6	338	PTN,CCL2,THBS1,CLDN3,PTGIS,LEP
GO: Biological Process	GO:0042445	hormone metabolic process	7.002e-05	5	208	NGF,MME,PAX8,LEP,ESR1
GO: Biological Process	GO:0002696	positive regulation of leukocyte activation	7.067e-05	6	341	GATA2,AIF1,CCL2,THBS1,LEP,TNFSF13B
GO: Biological Process	GO:0007584	response to nutrient	7.163e-05	5	209	PTN,CCL2,PEMT,FOXA2,LEP
GO: Biological Process	GO:0048638	regulation of developmental growth	7.299e-05	6	343	NGF,PLCB1,C3,LPAR3,LEP,BDNF
GO: Biological Process	GO:0070997	neuron death	7.658e-05	6	346	NGF,CCL2,NTF3,ESR1,BDNF,AGTR1
GO: Biological Process	GO:0033273	response to vitamin	7.799e-05	4	109	PTN,CCL2,PEMT,LEP
GO: Biological Process	GO:0022008	neurogenesis	7.992e-05	12	1628	GATA2,NGF,PTN,CCL2,LPAR3,CSF1R,FOXA2,EMX2,NTF3,LEP,BDNF,NRP2
GO: Biological Process	GO:0051241	negative regulation of multicellular organismal process	8.015e-05	10	1127	GATA2,SOX17,PTN,CCL2,THBS1,FOXA2,DCN,PAX8,LEP,BDNF
GO: Biological Process	GO:0072091	regulation of stem cell proliferation	8.371e-05	4	111	SOX17,NGF,PTN,BDNF
GO: Biological Process	GO:0007565	female pregnancy	8.553e-05	5	217	CCL2,PTGIS,LEP,ESR1,PGR
GO: Biological Process	GO:0060603	mammary gland duct morphogenesis	8.567e-05	3	41	CSF1R,ESR1,PGR
GO: Biological Process	GO:0030225	macrophage differentiation	8.567e-05	3	41	GATA2,PLCB1,CSF1R
GO: Biological Process	GO:0010883	regulation of lipid storage	8.567e-05	3	41	MSR1,C3,LEP
GO: Biological Process	GO:0048878	chemical homeostasis	8.567e-05	10	1136	GATA2,NGF,CCL2,LPAR3,FOXA2,DCN,LEP,PTH1R,ESR1,AGTR1
GO: Biological Process	GO:0050867	positive regulation of cell activation	8.685e-05	6	354	GATA2,AIF1,CCL2,THBS1,LEP,TNFSF13B
GO: Biological Process	GO:0006875	cellular metal ion homeostasis	8.786e-05	7	518	GATA2,NGF,CCL2,LPAR3,PTH1R,ESR1,AGTR1
GO: Biological Process	GO:0035360	positive regulation of peroxisome proliferator activated receptor signaling pathway	8.915e-05	2	7	PTGIS,LEP
GO: Biological Process	GO:0061138	morphogenesis of a branching epithelium	9.322e-05	5	221	FOXA2,PAX8,ESR1,PGR,AGTR1
GO: Biological Process	GO:0030182	neuron differentiation	9.643e-05	11	1398	GATA2,NGF,PTN,LPAR3,CSF1R,FOXA2,EMX2,NTF3,LEP,BDNF,NRP2
GO: Biological Process	GO:0072678	T cell migration	9.889e-05	3	43	AIF1,CCL2,CXCL16
GO: Biological Process	GO:0033674	positive regulation of kinase activity	0.0001014	7	530	NGF,LPAR3,THBS1,CSF1R,NTF3,LEP,AGTR1
GO: Biological Process	GO:0051962	positive regulation of nervous system development	0.0001026	7	531	GATA2,NGF,PTN,LPAR3,FOXA2,NTF3,BDNF
GO: Biological Process	GO:0060341	regulation of cellular localization	0.0001082	11	1416	GATA2,NGF,PTN,PLCB1,CCL2,CSF1R,PEMT,FOXA2,PAX8,LEP,AGTR1
GO: Biological Process	GO:0003002	regionalization	0.0001107	6	370	SOX17,HOXA10,FOXA2,EMX2,PAX8,NRP2
GO: Biological Process	GO:0001101	response to acid chemical	0.000114	6	372	NGF,PTN,CCL2,PEMT,LEP,BDNF
GO: Biological Process	GO:2000427	positive regulation of apoptotic cell clearance	0.0001187	2	8	CCL2,C3
GO: Biological Process	GO:0001935	endothelial cell proliferation	0.0001208	4	122	CCL2,THBS1,LEP,NRP2
GO: Biological Process	GO:0045666	positive regulation of neuron differentiation	0.0001209	6	376	GATA2,NGF,PTN,LPAR3,FOXA2,BDNF
GO: Biological Process	GO:0031670	cellular response to nutrient	0.0001211	3	46	PTN,FOXA2,LEP
GO: Biological Process	GO:0043627	response to estrogen	0.0001219	5	234	PTN,C3,LEP,ESR1,AGTR1
GO: Biological Process	GO:0045995	regulation of embryonic development	0.0001246	4	123	GATA2,SOX17,PLCB1,FOXA2
GO: Biological Process	GO:0010817	regulation of hormone levels	0.0001276	7	550	NGF,MME,FOXA2,PAX8,LEP,ESR1,AGTR1
GO: Biological Process	GO:1903530	regulation of secretion by cell	0.0001279	8	744	GATA2,NGF,PLCB1,CSF1R,FOXA2,PAX8,LEP,AGTR1
GO: Biological Process	GO:0001763	morphogenesis of a branching structure	0.0001294	5	237	FOXA2,PAX8,ESR1,PGR,AGTR1
GO: Biological Process	GO:0019221	cytokine-mediated signaling pathway	0.000132	7	553	PLCB1,CCL2,IRF6,CSF1R,DCN,LEP,TNFSF13B
GO: Biological Process	GO:0008585	female gonad development	0.0001368	4	126	FST,LEP,ESR1,PGR
GO: Biological Process	GO:0050900	leukocyte migration	0.0001395	6	386	PLCB1,AIF1,CCL2,CXCL16,THBS1,LEP
GO: Biological Process	GO:0007420	brain development	0.0001416	8	755	GATA2,PTN,PLCB1,CSF1R,FOXA2,EMX2,NTF3,NRP2
GO: Biological Process	GO:0060560	developmental growth involved in morphogenesis	0.0001427	5	242	NGF,LPAR3,ESR1,BDNF,NRP2
GO: Biological Process	GO:0002684	positive regulation of immune system process	0.0001466	9	976	GATA2,AIF1,CCL2,C3,THBS1,CSF1R,LEP,TNFSF13B,ESR1
GO: Biological Process	GO:0050801	ion homeostasis	0.0001468	8	759	GATA2,NGF,CCL2,LPAR3,DCN,PTH1R,ESR1,AGTR1
GO: Biological Process	GO:0050921	positive regulation of chemotaxis	0.0001543	4	130	AIF1,CCL2,THBS1,NTF3
GO: Biological Process	GO:0046545	development of primary female sexual characteristics	0.0001589	4	131	FST,LEP,ESR1,PGR
GO: Biological Process	GO:0055082	cellular chemical homeostasis	0.0001592	8	768	GATA2,NGF,CCL2,LPAR3,FOXA2,PTH1R,ESR1,AGTR1
GO: Biological Process	GO:0050729	positive regulation of inflammatory response	0.0001636	4	132	PLA2G2A,CCL2,C3,AGTR1
GO: Biological Process	GO:1901615	organic hydroxy compound metabolic process	0.0001644	7	573	PLCB1,PLA2G2A,PEMT,PAX8,LEP,PTH1R,AGTR1
GO: Biological Process	GO:0001709	cell fate determination	0.0001649	3	51	GATA2,SOX17,NTF3
GO: Biological Process	GO:0045766	positive regulation of angiogenesis	0.0001685	4	133	GATA2,C3,THBS1,PTGIS
GO: Biological Process	GO:0008406	gonad development	0.0001692	5	251	HOXA10,FST,LEP,ESR1,PGR
GO: Biological Process	GO:0045807	positive regulation of endocytosis	0.0001734	4	134	GATA2,CCL2,C3,NTF3
GO: Biological Process	GO:0045123	cellular extravasation	0.0001748	3	52	PLCB1,CCL2,LEP
GO: Biological Process	GO:0060326	cell chemotaxis	0.0001821	5	255	AIF1,CCL2,CXCL16,THBS1,AGTR1
GO: Biological Process	GO:0045137	development of primary sexual characteristics	0.0001855	5	256	HOXA10,FST,LEP,ESR1,PGR
GO: Biological Process	GO:0046486	glycerolipid metabolic process	0.000186	6	407	PLCB1,PLA2G2A,C3,CSF1R,PEMT,ESR1
GO: Biological Process	GO:0030900	forebrain development	0.000186	6	407	GATA2,PTN,PLCB1,CSF1R,EMX2,NRP2
GO: Biological Process	GO:0002682	regulation of immune system process	0.0001873	11	1506	GATA2,PLCB1,AIF1,CCL2,C3,THBS1,HTRA1,CSF1R,LEP,TNFSF13B,ESR1
GO: Biological Process	GO:0036005	response to macrophage colony-stimulating factor	0.0001903	2	10	CCL2,CSF1R
GO: Biological Process	GO:0036006	cellular response to macrophage colony-stimulating factor stimulus	0.0001903	2	10	CCL2,CSF1R
GO: Biological Process	GO:0042698	ovulation cycle	0.0001941	4	138	PTN,LEP,ESR1,PGR
GO: Biological Process	GO:0030003	cellular cation homeostasis	0.0002009	7	592	GATA2,NGF,CCL2,LPAR3,PTH1R,ESR1,AGTR1
GO: Biological Process	GO:0055065	metal ion homeostasis	0.000203	7	593	GATA2,NGF,CCL2,LPAR3,PTH1R,ESR1,AGTR1
GO: Biological Process	GO:0050922	negative regulation of chemotaxis	0.0002066	3	55	AIF1,CCL2,THBS1
GO: Biological Process	GO:0051046	regulation of secretion	0.0002106	8	800	GATA2,NGF,PLCB1,CSF1R,FOXA2,PAX8,LEP,AGTR1
GO: Biological Process	GO:0097306	cellular response to alcohol	0.0002108	4	141	PTN,CCL2,ESR1,AGTR1
GO: Biological Process	GO:1901699	cellular response to nitrogen compound	0.0002115	7	597	PLCB1,AIF1,CCL2,THBS1,LEP,ESR1,AGTR1
GO: Biological Process	GO:0048699	generation of neurons	0.0002128	11	1528	GATA2,NGF,PTN,LPAR3,CSF1R,FOXA2,EMX2,NTF3,LEP,BDNF,NRP2
GO: Biological Process	GO:0060322	head development	0.0002142	8	802	GATA2,PTN,PLCB1,CSF1R,FOXA2,EMX2,NTF3,NRP2
GO: Biological Process	GO:0006911	phagocytosis, engulfment	0.000218	3	56	GATA2,AIF1,THBS1
GO: Biological Process	GO:0061448	connective tissue development	0.0002216	5	266	THBS1,RXFP1,FOXA2,LEP,PTH1R
GO: Biological Process	GO:0034374	low-density lipoprotein particle remodeling	0.0002323	2	11	PLA2G2A,AGTR1
GO: Biological Process	GO:2000425	regulation of apoptotic cell clearance	0.0002323	2	11	CCL2,C3
GO: Biological Process	GO:0070372	regulation of ERK1 and ERK2 cascade	0.0002334	5	269	PLA2G2A,CCL2,C3,CSF1R,ESR1
GO: Biological Process	GO:0006873	cellular ion homeostasis	0.0002342	7	607	GATA2,NGF,CCL2,LPAR3,PTH1R,ESR1,AGTR1
GO: Biological Process	GO:0046660	female sex differentiation	0.0002409	4	146	FST,LEP,ESR1,PGR
GO: Biological Process	GO:0031347	regulation of defense response	0.0002492	8	820	PLA2G2A,CCL2,C3,HTRA1,PTGIS,LEP,ESR1,AGTR1
GO: Biological Process	GO:0007186	G protein-coupled receptor signaling pathway	0.0002506	10	1294	PLCB1,CCL2,C3,LPAR3,RXFP1,PAX8,PTH1R,ESR1,BDNF,AGTR1
GO: Biological Process	GO:0060688	regulation of morphogenesis of a branching structure	0.0002545	3	59	PAX8,ESR1,AGTR1
GO: Biological Process	GO:0097006	regulation of plasma lipoprotein particle levels	0.0002545	3	59	MSR1,PLA2G2A,AGTR1
GO: Biological Process	GO:0050766	positive regulation of phagocytosis	0.0002545	3	59	GATA2,CCL2,C3
GO: Biological Process	GO:1904018	positive regulation of vasculature development	0.0002604	4	149	GATA2,C3,THBS1,PTGIS
GO: Biological Process	GO:0022409	positive regulation of cell-cell adhesion	0.0002628	5	276	AIF1,CCL2,FOXA2,LEP,TNFSF13B
GO: Biological Process	GO:0060443	mammary gland morphogenesis	0.0002675	3	60	CSF1R,ESR1,PGR
GO: Biological Process	GO:0009991	response to extracellular stimulus	0.0002718	7	622	PTN,AIF1,CCL2,PEMT,FOXA2,DCN,LEP
GO: Biological Process	GO:0006955	immune response	0.000273	11	1572	GATA2,AIF1,CCL2,C3,CXCL16,IRF6,THBS1,CSF1R,LEP,TNFSF13B,ESR1
GO: Biological Process	GO:0035358	regulation of peroxisome proliferator activated receptor signaling pathway	0.0002783	2	12	PTGIS,LEP
GO: Biological Process	GO:0044255	cellular lipid metabolic process	0.0002803	9	1064	PLCB1,PLA2G2A,C3,CSF1R,PEMT,PTGIS,LEP,ESR1,AGTR1
GO: Biological Process	GO:0032355	response to estradiol	0.0002809	4	152	PTN,C3,LEP,ESR1
GO: Biological Process	GO:0032615	interleukin-12 production	0.000281	3	61	PLCB1,THBS1,LEP
GO: Biological Process	GO:0022612	gland morphogenesis	0.000288	4	153	PTN,CSF1R,ESR1,PGR
GO: Biological Process	GO:0001817	regulation of cytokine production	0.0002966	7	631	PLCB1,CCL2,C3,THBS1,CSF1R,LEP,AGTR1
GO: Biological Process	GO:0070371	ERK1 and ERK2 cascade	0.0002998	5	284	PLA2G2A,CCL2,C3,CSF1R,ESR1
GO: Biological Process	GO:0045087	innate immune response	0.0003078	8	846	AIF1,CCL2,C3,CXCL16,IRF6,CSF1R,LEP,ESR1
GO: Biological Process	GO:0045428	regulation of nitric oxide biosynthetic process	0.0003239	3	64	AIF1,PTGIS,ESR1
GO: Biological Process	GO:0001542	ovulation from ovarian follicle	0.0003285	2	13	LEP,PGR
GO: Biological Process	GO:0071383	cellular response to steroid hormone stimulus	0.0003301	5	290	CCL2,ESR1,BDNF,PGR,AGTR1
GO: Biological Process	GO:0001822	kidney development	0.0003354	5	291	MME,DCN,PAX8,BDNF,AGTR1
GO: Biological Process	GO:0019915	lipid storage	0.000339	3	65	MSR1,C3,LEP
GO: Biological Process	GO:1904892	regulation of STAT cascade	0.0003415	4	160	CSF1R,DCN,LEP,AGTR1
GO: Biological Process	GO:0046425	regulation of JAK-STAT cascade	0.0003415	4	160	CSF1R,DCN,LEP,AGTR1
GO: Biological Process	GO:0045944	positive regulation of transcription by RNA polymerase II	0.0003445	9	1094	GATA2,SOX17,HOXA10,FOXA2,DCN,PAX8,NTF3,ESR1,PGR
GO: Biological Process	GO:0010324	membrane invagination	0.0003547	3	66	GATA2,AIF1,THBS1
GO: Biological Process	GO:0010243	response to organonitrogen compound	0.0003603	8	866	PTN,PLCB1,AIF1,CCL2,PEMT,LEP,PGR,AGTR1
GO: Biological Process	GO:0034341	response to interferon-gamma	0.0003664	4	163	AIF1,CCL2,CXCL16,IRF6
GO: Biological Process	GO:0010629	negative regulation of gene expression	0.000368	11	1627	GATA2,SOX17,PLCB1,AIF1,THBS1,FOXA2,FST,PTGIS,LEP,ESR1,PGR
GO: Biological Process	GO:0045664	regulation of neuron differentiation	0.0003717	7	655	GATA2,NGF,PTN,LPAR3,FOXA2,NTF3,BDNF
GO: Biological Process	GO:0006357	regulation of transcription by RNA polymerase II	0.000375	12	1916	GATA2,SOX17,HOXA10,HTRA1,FOXA2,DCN,FST,PAX8,NTF3,LEP,ESR1,PGR
GO: Biological Process	GO:0061061	muscle structure development	0.0003786	7	657	SOX17,PLCB1,TAGLN,CSF1R,DCN,NTF3,BDNF
GO: Biological Process	GO:0030522	intracellular receptor signaling pathway	0.0003798	5	299	PTGIS,LEP,ESR1,BDNF,PGR
GO: Biological Process	GO:0010759	positive regulation of macrophage chemotaxis	0.0003827	2	14	CCL2,THBS1
GO: Biological Process	GO:0021879	forebrain neuron differentiation	0.0003873	3	68	GATA2,CSF1R,NRP2
GO: Biological Process	GO:0048666	neuron development	0.0003937	9	1114	GATA2,NGF,PTN,LPAR3,CSF1R,NTF3,LEP,BDNF,NRP2
GO: Biological Process	GO:0035265	organ growth	0.0004017	4	167	BNC2,THBS1,LEP,ESR1
GO: Biological Process	GO:0051347	positive regulation of transferase activity	0.0004073	7	665	NGF,LPAR3,THBS1,CSF1R,NTF3,LEP,AGTR1
GO: Biological Process	GO:0072089	stem cell proliferation	0.0004108	4	168	SOX17,NGF,PTN,BDNF
GO: Biological Process	GO:0006629	lipid metabolic process	0.0004133	10	1377	PLCB1,PLA2G2A,C3,CSF1R,PEMT,FOXA2,PTGIS,LEP,ESR1,AGTR1
GO: Biological Process	GO:0019725	cellular homeostasis	0.0004167	8	885	GATA2,NGF,CCL2,LPAR3,FOXA2,PTH1R,ESR1,AGTR1
GO: Biological Process	GO:0007409	axonogenesis	0.0004259	6	475	NGF,LPAR3,CSF1R,NTF3,BDNF,NRP2
GO: Biological Process	GO:0030307	positive regulation of cell growth	0.0004297	4	170	NGF,LPAR3,CXCL16,BDNF
GO: Biological Process	GO:0050746	regulation of lipoprotein metabolic process	0.000441	2	15	PEMT,LEP
GO: Biological Process	GO:0007548	sex differentiation	0.0004414	5	309	HOXA10,FST,LEP,ESR1,PGR
GO: Biological Process	GO:0042493	response to drug	0.0004552	6	481	PTN,CCL2,THBS1,PEMT,EMX2,BDNF
GO: Biological Process	GO:0032760	positive regulation of tumor necrosis factor production	0.0004583	3	72	CCL2,THBS1,LEP
GO: Biological Process	GO:0097529	myeloid leukocyte migration	0.0004691	4	174	PLCB1,AIF1,CCL2,THBS1
GO: Biological Process	GO:0055080	cation homeostasis	0.0004739	7	682	GATA2,NGF,CCL2,LPAR3,PTH1R,ESR1,AGTR1
GO: Biological Process	GO:0014823	response to activity	0.0004772	3	73	PTN,CCL2,LEP
GO: Biological Process	GO:0002685	regulation of leukocyte migration	0.0004898	4	176	PLCB1,AIF1,CCL2,THBS1
GO: Biological Process	GO:0099536	synaptic signaling	0.0004951	7	687	NGF,PTN,PLCB1,CCL2,LPAR3,NTF3,BDNF
GO: Biological Process	GO:1903557	positive regulation of tumor necrosis factor superfamily cytokine production	0.0004966	3	74	CCL2,THBS1,LEP
GO: Biological Process	GO:1904035	regulation of epithelial cell apoptotic process	0.0004966	3	74	NGF,THBS1,PGR
GO: Biological Process	GO:0051384	response to glucocorticoid	0.0005004	4	177	AIF1,CCL2,C3,AGTR1
GO: Biological Process	GO:0090026	positive regulation of monocyte chemotaxis	0.0005034	2	16	AIF1,CCL2
GO: Biological Process	GO:0051482	positive regulation of cytosolic calcium ion concentration involved in phospholipase C-activating G protein-coupled signaling pathway	0.0005034	2	16	LPAR3,AGTR1
GO: Biological Process	GO:0006809	nitric oxide biosynthetic process	0.0005166	3	75	AIF1,PTGIS,ESR1
GO: Biological Process	GO:0045596	negative regulation of cell differentiation	0.000526	7	694	GATA2,SOX17,PTN,FOXA2,FST,PAX8,BDNF
GO: Biological Process	GO:0021675	nerve development	0.000537	3	76	NTF3,BDNF,NRP2
GO: Biological Process	GO:0098771	inorganic ion homeostasis	0.0005444	7	698	GATA2,NGF,CCL2,LPAR3,PTH1R,ESR1,AGTR1
GO: Biological Process	GO:0001816	cytokine production	0.0005537	7	700	PLCB1,CCL2,C3,THBS1,CSF1R,LEP,AGTR1
GO: Biological Process	GO:0021872	forebrain generation of neurons	0.000558	3	77	GATA2,CSF1R,NRP2
GO: Biological Process	GO:0010770	positive regulation of cell morphogenesis involved in differentiation	0.0005672	4	183	NGF,LPAR3,PAX8,BDNF
GO: Biological Process	GO:0019216	regulation of lipid metabolic process	0.000571	5	327	C3,FOXA2,LEP,ESR1,AGTR1
GO: Biological Process	GO:0030155	regulation of cell adhesion	0.0005729	7	704	PTN,AIF1,CCL2,THBS1,FOXA2,LEP,TNFSF13B
GO: Biological Process	GO:0007187	G protein-coupled receptor signaling pathway, coupled to cyclic nucleotide second messenger	0.000579	4	184	CCL2,LPAR3,RXFP1,PTH1R
GO: Biological Process	GO:0002703	regulation of leukocyte mediated immunity	0.000579	4	184	GATA2,CCL2,C3,LEP
GO: Biological Process	GO:0046209	nitric oxide metabolic process	0.0006015	3	79	AIF1,PTGIS,ESR1
GO: Biological Process	GO:0002694	regulation of leukocyte activation	0.0006199	6	510	GATA2,AIF1,CCL2,THBS1,LEP,TNFSF13B
GO: Biological Process	GO:0050772	positive regulation of axonogenesis	0.000624	3	80	NGF,LPAR3,BDNF
GO: Biological Process	GO:0071900	regulation of protein serine/threonine kinase activity	0.0006393	6	513	NGF,LPAR3,THBS1,CSF1R,NTF3,DIRAS3
GO: Biological Process	GO:0061564	axon development	0.0006458	6	514	NGF,LPAR3,CSF1R,NTF3,BDNF,NRP2
GO: Biological Process	GO:0031960	response to corticosteroid	0.0006531	4	190	AIF1,CCL2,C3,AGTR1
GO: Biological Process	GO:0072676	lymphocyte migration	0.0006707	3	82	AIF1,CCL2,CXCL16
GO: Biological Process	GO:2001057	reactive nitrogen species metabolic process	0.0006948	3	83	AIF1,PTGIS,ESR1
GO: Biological Process	GO:1903426	regulation of reactive oxygen species biosynthetic process	0.0006948	3	83	AIF1,PTGIS,ESR1
GO: Biological Process	GO:0021536	diencephalon development	0.0006948	3	83	GATA2,PTN,NRP2
GO: Biological Process	GO:0035357	peroxisome proliferator activated receptor signaling pathway	0.0007145	2	19	PTGIS,LEP
GO: Biological Process	GO:0071675	regulation of mononuclear cell migration	0.0007145	2	19	CCL2,THBS1
GO: Biological Process	GO:0021954	central nervous system neuron development	0.0007448	3	85	GATA2,LEP,NRP2
GO: Biological Process	GO:0009628	response to abiotic stimulus	0.0007449	9	1216	PTN,AIF1,CCL2,THBS1,CLDN3,MME,DCN,PTGIS,LEP
GO: Biological Process	GO:0001501	skeletal system development	0.0007581	6	530	HOXA10,THBS1,FST,LEP,PTH1R,ESR1
GO: Biological Process	GO:1904894	positive regulation of STAT cascade	0.0007706	3	86	CSF1R,LEP,AGTR1
GO: Biological Process	GO:0002690	positive regulation of leukocyte chemotaxis	0.0007706	3	86	AIF1,CCL2,THBS1
GO: Biological Process	GO:0050764	regulation of phagocytosis	0.0007706	3	86	GATA2,CCL2,C3
GO: Biological Process	GO:0046427	positive regulation of JAK-STAT cascade	0.0007706	3	86	CSF1R,LEP,AGTR1
GO: Biological Process	GO:0050920	regulation of chemotaxis	0.0007765	4	199	AIF1,CCL2,THBS1,NTF3
GO: Biological Process	GO:0030595	leukocyte chemotaxis	0.0007911	4	200	AIF1,CCL2,CXCL16,THBS1
GO: Biological Process	GO:0021953	central nervous system neuron differentiation	0.0007911	4	200	GATA2,CSF1R,LEP,NRP2
GO: Biological Process	GO:0010884	positive regulation of lipid storage	0.0007928	2	20	MSR1,C3
GO: Biological Process	GO:0002076	osteoblast development	0.0007928	2	20	PTH1R,ESR1
GO: Biological Process	GO:0046325	negative regulation of glucose import	0.0007928	2	20	LEP,ESR1
GO: Biological Process	GO:0060284	regulation of cell development	0.0008458	8	985	GATA2,NGF,PTN,LPAR3,FOXA2,PAX8,NTF3,BDNF
GO: Biological Process	GO:0050804	modulation of chemical synaptic transmission	0.0008483	5	357	NGF,PTN,CCL2,NTF3,BDNF
GO: Biological Process	GO:0045639	positive regulation of myeloid cell differentiation	0.0008514	3	89	GATA2,CSF1R,LEP
GO: Biological Process	GO:0010876	lipid localization	0.0008698	5	359	MSR1,C3,THBS1,LEP,AGTR1
GO: Biological Process	GO:0016192	vesicle-mediated transport	0.0008726	10	1514	GATA2,MSR1,PLCB1,AIF1,CCL2,C3,CXCL16,THBS1,NTF3,LEP
GO: Biological Process	GO:0036120	cellular response to platelet-derived growth factor stimulus	0.0008751	2	21	PTN,CCL2
GO: Biological Process	GO:0010758	regulation of macrophage chemotaxis	0.0008751	2	21	CCL2,THBS1
GO: Biological Process	GO:0071674	mononuclear cell migration	0.0008751	2	21	CCL2,THBS1
GO: Biological Process	GO:2000647	negative regulation of stem cell proliferation	0.0008751	2	21	PTN,BDNF
GO: Biological Process	GO:0071229	cellular response to acid chemical	0.0008832	4	206	NGF,CCL2,LEP,BDNF
GO: Biological Process	GO:0050865	regulation of cell activation	0.0009192	6	550	GATA2,AIF1,CCL2,THBS1,LEP,TNFSF13B
GO: Biological Process	GO:0048015	phosphatidylinositol-mediated signaling	0.000932	4	209	NGF,CSF1R,DCN,LEP
GO: Biological Process	GO:0007155	cell adhesion	0.0009467	10	1530	PTN,PLCB1,AIF1,CCL2,THBS1,CLDN3,FOXA2,LEP,TNFSF13B,NRP2
GO: Biological Process	GO:0060065	uterus development	0.0009614	2	22	HOXA10,ESR1
GO: Biological Process	GO:0036119	response to platelet-derived growth factor	0.0009614	2	22	PTN,CCL2
GO: Biological Process	GO:0090025	regulation of monocyte chemotaxis	0.0009614	2	22	AIF1,CCL2
GO: Biological Process	GO:0007567	parturition	0.0009614	2	22	CCL2,RXFP1
GO: Biological Process	GO:0090190	positive regulation of branching involved in ureteric bud morphogenesis	0.0009614	2	22	PAX8,AGTR1
GO: Biological Process	GO:0001991	regulation of systemic arterial blood pressure by circulatory renin-angiotensin	0.0009614	2	22	MME,AGTR1
GO: Biological Process	GO:0023019	signal transduction involved in regulation of gene expression	0.0009614	2	22	SOX17,FOXA2
GO: Biological Process	GO:0048017	inositol lipid-mediated signaling	0.0009827	4	212	NGF,CSF1R,DCN,LEP
GO: Biological Process	GO:0031668	cellular response to extracellular stimulus	0.0009827	4	212	PTN,AIF1,FOXA2,LEP
GO: Biological Process	GO:0046849	bone remodeling	0.0009977	3	94	CSF1R,LEP,PTH1R
GO: Biological Process	GO:0019218	regulation of steroid metabolic process	0.0009977	3	94	FOXA2,LEP,AGTR1
GO: Biological Process	GO:0022610	biological adhesion	0.001006	10	1542	PTN,PLCB1,AIF1,CCL2,THBS1,CLDN3,FOXA2,LEP,TNFSF13B,NRP2
GO: Biological Process	GO:0010769	regulation of cell morphogenesis involved in differentiation	0.001044	5	374	NGF,LPAR3,FOXA2,PAX8,BDNF
GO: Biological Process	GO:0003416	endochondral bone growth	0.001052	2	23	BNC2,THBS1
GO: Biological Process	GO:0010829	negative regulation of glucose transmembrane transport	0.001052	2	23	LEP,ESR1
GO: Biological Process	GO:0051341	regulation of oxidoreductase activity	0.00106	3	96	LEP,ESR1,AGTR1
GO: Biological Process	GO:0034284	response to monosaccharide	0.001071	4	217	PLCB1,THBS1,FOXA2,LEP
GO: Biological Process	GO:0050767	regulation of neurogenesis	0.00108	7	784	GATA2,NGF,PTN,LPAR3,FOXA2,NTF3,BDNF
GO: Biological Process	GO:0071347	cellular response to interleukin-1	0.001093	3	97	PLCB1,CCL2,PTGIS
GO: Biological Process	GO:1904019	epithelial cell apoptotic process	0.001126	3	98	NGF,THBS1,PGR
GO: Biological Process	GO:0032891	negative regulation of organic acid transport	0.001146	2	24	THBS1,LEP
GO: Biological Process	GO:0034367	protein-containing complex remodeling	0.001146	2	24	PLA2G2A,AGTR1
GO: Biological Process	GO:0043586	tongue development	0.001146	2	24	BNC2,BDNF
GO: Biological Process	GO:0034369	plasma lipoprotein particle remodeling	0.001146	2	24	PLA2G2A,AGTR1
GO: Biological Process	GO:0046697	decidualization	0.001146	2	24	PTGIS,ESR1
GO: Biological Process	GO:0034368	protein-lipid complex remodeling	0.001146	2	24	PLA2G2A,AGTR1
GO: Biological Process	GO:0030324	lung development	0.001146	4	221	PTN,RXFP1,FOXA2,PGR
GO: Biological Process	GO:0048588	developmental cell growth	0.001166	4	222	NGF,LPAR3,BDNF,NRP2
GO: Biological Process	GO:0009952	anterior/posterior pattern specification	0.001205	4	224	SOX17,HOXA10,FOXA2,EMX2
GO: Biological Process	GO:0030323	respiratory tube development	0.001225	4	225	PTN,RXFP1,FOXA2,PGR
GO: Biological Process	GO:0061213	positive regulation of mesonephros development	0.001244	2	25	PAX8,AGTR1
GO: Biological Process	GO:0090189	regulation of branching involved in ureteric bud morphogenesis	0.001244	2	25	PAX8,AGTR1
GO: Biological Process	GO:0030100	regulation of endocytosis	0.001245	4	226	GATA2,CCL2,C3,NTF3
GO: Biological Process	GO:0043085	positive regulation of catalytic activity	0.001261	10	1588	NGF,PLCB1,CCL2,LPAR3,THBS1,CSF1R,NTF3,LEP,ESR1,AGTR1
GO: Biological Process	GO:0023057	negative regulation of signaling	0.001273	9	1311	GATA2,SOX17,THBS1,HTRA1,DCN,FST,LEP,ESR1,BDNF
GO: Biological Process	GO:0050886	endocrine process	0.001299	3	103	MME,LEP,AGTR1
GO: Biological Process	GO:0048667	cell morphogenesis involved in neuron differentiation	0.00132	6	590	NGF,LPAR3,CSF1R,NTF3,BDNF,NRP2
GO: Biological Process	GO:0044093	positive regulation of molecular function	0.001321	11	1893	NGF,PLCB1,CCL2,LPAR3,THBS1,CSF1R,NTF3,LEP,ESR1,BDNF,AGTR1
GO: Biological Process	GO:0051090	regulation of DNA-binding transcription factor activity	0.001331	5	395	NGF,FOXA2,PTGIS,ESR1,BDNF
GO: Biological Process	GO:1903409	reactive oxygen species biosynthetic process	0.001336	3	104	AIF1,PTGIS,ESR1
GO: Biological Process	GO:0031667	response to nutrient levels	0.001343	6	592	PTN,CCL2,PEMT,FOXA2,DCN,LEP
GO: Biological Process	GO:0038084	vascular endothelial growth factor signaling pathway	0.001345	2	26	DCN,NRP2
GO: Biological Process	GO:2000178	negative regulation of neural precursor cell proliferation	0.001345	2	26	GATA2,BDNF
GO: Biological Process	GO:0021533	cell differentiation in hindbrain	0.001345	2	26	GATA2,FOXA2
GO: Biological Process	GO:0032026	response to magnesium ion	0.001345	2	26	C3,THBS1
GO: Biological Process	GO:0050870	positive regulation of T cell activation	0.001349	4	231	AIF1,CCL2,LEP,TNFSF13B
GO: Biological Process	GO:0007507	heart development	0.001355	6	593	GATA2,SOX17,PTN,THBS1,AGTR1,NRP2
GO: Biological Process	GO:0001657	ureteric bud development	0.001373	3	105	PAX8,BDNF,AGTR1
GO: Biological Process	GO:0070663	regulation of leukocyte proliferation	0.001393	4	233	AIF1,CCL2,LEP,TNFSF13B
GO: Biological Process	GO:0010648	negative regulation of cell communication	0.001393	9	1328	GATA2,SOX17,THBS1,HTRA1,DCN,FST,LEP,ESR1,BDNF
GO: Biological Process	GO:0032368	regulation of lipid transport	0.001411	3	106	THBS1,LEP,AGTR1
GO: Biological Process	GO:0002705	positive regulation of leukocyte mediated immunity	0.001411	3	106	GATA2,CCL2,C3
GO: Biological Process	GO:0072164	mesonephric tubule development	0.001411	3	106	PAX8,BDNF,AGTR1
GO: Biological Process	GO:0072163	mesonephric epithelium development	0.001411	3	106	PAX8,BDNF,AGTR1
GO: Biological Process	GO:0042102	positive regulation of T cell proliferation	0.00145	3	107	AIF1,LEP,TNFSF13B
GO: Biological Process	GO:0002688	regulation of leukocyte chemotaxis	0.00145	3	107	AIF1,CCL2,THBS1
GO: Biological Process	GO:0002691	regulation of cellular extravasation	0.001451	2	27	PLCB1,CCL2
GO: Biological Process	GO:0002888	positive regulation of myeloid leukocyte mediated immunity	0.001451	2	27	GATA2,C3
GO: Biological Process	GO:0034112	positive regulation of homotypic cell-cell adhesion	0.00146	4	236	AIF1,CCL2,LEP,TNFSF13B
GO: Biological Process	GO:0007517	muscle organ development	0.001487	5	405	SOX17,TAGLN,CSF1R,DCN,BDNF
GO: Biological Process	GO:0030282	bone mineralization	0.001529	3	109	PTN,LEP,PTH1R
GO: Biological Process	GO:0006066	alcohol metabolic process	0.001536	5	408	PLCB1,PLA2G2A,PEMT,LEP,PTH1R
GO: Biological Process	GO:1903039	positive regulation of leukocyte cell-cell adhesion	0.001553	4	240	AIF1,CCL2,LEP,TNFSF13B
GO: Biological Process	GO:0007411	axon guidance	0.001553	4	240	CSF1R,NTF3,BDNF,NRP2
GO: Biological Process	GO:0060444	branching involved in mammary gland duct morphogenesis	0.001561	2	28	ESR1,PGR
GO: Biological Process	GO:0061217	regulation of mesonephros development	0.001561	2	28	PAX8,AGTR1
GO: Biological Process	GO:0030728	ovulation	0.001561	2	28	LEP,PGR
GO: Biological Process	GO:0071354	cellular response to interleukin-6	0.001561	2	28	CCL2,PTGIS
GO: Biological Process	GO:1900087	positive regulation of G1/S transition of mitotic cell cycle	0.001561	2	28	PLCB1,AIF1
GO: Biological Process	GO:0022602	ovulation cycle process	0.00157	3	110	LEP,ESR1,PGR
GO: Biological Process	GO:0001823	mesonephros development	0.00157	3	110	PAX8,BDNF,AGTR1
GO: Biological Process	GO:1901617	organic hydroxy compound biosynthetic process	0.001577	4	241	PEMT,LEP,PTH1R,AGTR1
GO: Biological Process	GO:0097485	neuron projection guidance	0.001577	4	241	CSF1R,NTF3,BDNF,NRP2
GO: Biological Process	GO:0009743	response to carbohydrate	0.001601	4	242	PLCB1,THBS1,FOXA2,LEP
GO: Biological Process	GO:0019751	polyol metabolic process	0.001611	3	111	PLCB1,LEP,PTH1R
GO: Biological Process	GO:1903532	positive regulation of secretion by cell	0.00169	5	417	GATA2,PLCB1,CSF1R,LEP,AGTR1
GO: Biological Process	GO:0002064	epithelial cell development	0.0017	4	246	CLDN3,PAX8,ESR1,PGR
GO: Biological Process	GO:0002683	negative regulation of immune system process	0.001744	5	420	GATA2,PLCB1,CCL2,THBS1,HTRA1
GO: Biological Process	GO:0048812	neuron projection morphogenesis	0.001843	6	630	NGF,LPAR3,CSF1R,NTF3,BDNF,NRP2
GO: Biological Process	GO:0031349	positive regulation of defense response	0.001875	5	427	PLA2G2A,CCL2,C3,ESR1,AGTR1
GO: Biological Process	GO:0060541	respiratory system development	0.00191	4	254	PTN,RXFP1,FOXA2,PGR
GO: Biological Process	GO:0010827	regulation of glucose transmembrane transport	0.001919	3	118	C3,LEP,ESR1
GO: Biological Process	GO:0061387	regulation of extent of cell growth	0.001919	3	118	NGF,LPAR3,BDNF
GO: Biological Process	GO:0022407	regulation of cell-cell adhesion	0.001934	5	430	AIF1,CCL2,FOXA2,LEP,TNFSF13B
GO: Biological Process	GO:0090287	regulation of cellular response to growth factor stimulus	0.001966	4	256	NGF,THBS1,HTRA1,DCN
GO: Biological Process	GO:0010594	regulation of endothelial cell migration	0.001966	3	119	THBS1,DCN,NRP2
GO: Biological Process	GO:2000249	regulation of actin cytoskeleton reorganization	0.002037	2	32	CSF1R,NTF3
GO: Biological Process	GO:0016486	peptide hormone processing	0.002037	2	32	NGF,MME
GO: Biological Process	GO:0021987	cerebral cortex development	0.002062	3	121	PLCB1,EMX2,NRP2
GO: Biological Process	GO:0021537	telencephalon development	0.00208	4	260	PLCB1,CSF1R,EMX2,NRP2
GO: Biological Process	GO:1990375	baculum development	0.002098	1	1	ESR1
GO: Biological Process	GO:0071350	cellular response to interleukin-15	0.002098	1	1	PLCB1
GO: Biological Process	GO:0000433	carbon catabolite repression of transcription from RNA polymerase II promoter by glucose	0.002098	1	1	FOXA2
GO: Biological Process	GO:1904649	regulation of fat cell apoptotic process	0.002098	1	1	LEP
GO: Biological Process	GO:2000971	negative regulation of detection of glucose	0.002098	1	1	FOXA2
GO: Biological Process	GO:1904651	positive regulation of fat cell apoptotic process	0.002098	1	1	LEP
GO: Biological Process	GO:2000486	negative regulation of glutamine transport	0.002098	1	1	LEP
GO: Biological Process	GO:2000560	positive regulation of CD24 biosynthetic process	0.002098	1	1	PLCB1
GO: Biological Process	GO:1904391	response to ciliary neurotrophic factor	0.002098	1	1	PTN
GO: Biological Process	GO:1904700	granulosa cell apoptotic process	0.002098	1	1	PGR
GO: Biological Process	GO:0033552	response to vitamin B3	0.002098	1	1	CCL2
GO: Biological Process	GO:1904708	regulation of granulosa cell apoptotic process	0.002098	1	1	PGR
GO: Biological Process	GO:1904389	rod bipolar cell differentiation	0.002098	1	1	PTN
GO: Biological Process	GO:0014739	positive regulation of muscle hyperplasia	0.002098	1	1	AIF1
GO: Biological Process	GO:2000438	negative regulation of monocyte extravasation	0.002098	1	1	PLCB1
GO: Biological Process	GO:1904709	negative regulation of granulosa cell apoptotic process	0.002098	1	1	PGR
GO: Biological Process	GO:2000559	regulation of CD24 biosynthetic process	0.002098	1	1	PLCB1
GO: Biological Process	GO:0060807	regulation of transcription from RNA polymerase II promoter involved in definitive endodermal cell fate specification	0.002098	1	1	SOX17
GO: Biological Process	GO:0035724	CD24 biosynthetic process	0.002098	1	1	PLCB1
GO: Biological Process	GO:0010754	negative regulation of cGMP-mediated signaling	0.002098	1	1	THBS1
GO: Biological Process	GO:0035723	interleukin-15-mediated signaling pathway	0.002098	1	1	PLCB1
GO: Biological Process	GO:0000437	carbon catabolite repression of transcription from RNA polymerase II promoter	0.002098	1	1	FOXA2
GO: Biological Process	GO:1904397	negative regulation of neuromuscular junction development	0.002098	1	1	PTN
GO: Biological Process	GO:1904606	fat cell apoptotic process	0.002098	1	1	LEP
GO: Biological Process	GO:0002605	negative regulation of dendritic cell antigen processing and presentation	0.002098	1	1	THBS1
GO: Biological Process	GO:1904373	response to kainic acid	0.002098	1	1	PTN
GO: Biological Process	GO:0003142	cardiogenic plate morphogenesis	0.002098	1	1	SOX17
GO: Biological Process	GO:0071298	cellular response to L-ascorbic acid	0.002098	1	1	LEP
GO: Biological Process	GO:2000970	regulation of detection of glucose	0.002098	1	1	FOXA2
GO: Biological Process	GO:0031550	positive regulation of brain-derived neurotrophic factor receptor signaling pathway	0.002098	1	1	BDNF
GO: Biological Process	GO:0051960	regulation of nervous system development	0.002113	7	881	GATA2,NGF,PTN,LPAR3,FOXA2,NTF3,BDNF
GO: Biological Process	GO:0032680	regulation of tumor necrosis factor production	0.00216	3	123	CCL2,THBS1,LEP
GO: Biological Process	GO:0003081	regulation of systemic arterial blood pressure by renin-angiotensin	0.002166	2	33	MME,AGTR1
GO: Biological Process	GO:1902808	positive regulation of cell cycle G1/S phase transition	0.002166	2	33	PLCB1,AIF1
GO: Biological Process	GO:0010574	regulation of vascular endothelial growth factor production	0.002166	2	33	CCL2,C3
GO: Biological Process	GO:0071295	cellular response to vitamin	0.002166	2	33	PTN,LEP
GO: Biological Process	GO:0060485	mesenchyme development	0.002198	4	264	BNC2,THBS1,FOXA2,NRP2
GO: Biological Process	GO:0070555	response to interleukin-1	0.002211	3	124	PLCB1,CCL2,PTGIS
GO: Biological Process	GO:0032640	tumor necrosis factor production	0.002211	3	124	CCL2,THBS1,LEP
GO: Biological Process	GO:0002686	negative regulation of leukocyte migration	0.002298	2	34	PLCB1,CCL2
GO: Biological Process	GO:0048246	macrophage chemotaxis	0.002298	2	34	CCL2,THBS1
GO: Biological Process	GO:1903555	regulation of tumor necrosis factor superfamily cytokine production	0.002314	3	126	CCL2,THBS1,LEP
GO: Biological Process	GO:0051047	positive regulation of secretion	0.002357	5	450	GATA2,PLCB1,CSF1R,LEP,AGTR1
GO: Biological Process	GO:0044092	negative regulation of molecular function	0.002369	8	1157	NGF,PTN,C3,THBS1,FOXA2,DCN,PTGIS,ESR1
GO: Biological Process	GO:0007611	learning or memory	0.002417	4	271	NGF,PTN,PLCB1,BDNF
GO: Biological Process	GO:0007292	female gamete generation	0.002419	3	128	PLCB1,LEP,PGR
GO: Biological Process	GO:0001893	maternal placenta development	0.002434	2	35	PTGIS,ESR1
GO: Biological Process	GO:0010573	vascular endothelial growth factor production	0.002434	2	35	CCL2,C3
GO: Biological Process	GO:0071706	tumor necrosis factor superfamily cytokine production	0.002473	3	129	CCL2,THBS1,LEP
GO: Biological Process	GO:0002687	positive regulation of leukocyte migration	0.002473	3	129	AIF1,CCL2,THBS1
GO: Biological Process	GO:0043200	response to amino acid	0.002473	3	129	PTN,CCL2,PEMT
GO: Biological Process	GO:0043269	regulation of ion transport	0.002494	6	669	NGF,PLCB1,CCL2,LPAR3,THBS1,LEP
GO: Biological Process	GO:0045165	cell fate commitment	0.002515	4	274	GATA2,SOX17,FOXA2,NTF3
GO: Biological Process	GO:0071827	plasma lipoprotein particle organization	0.002574	2	36	PLA2G2A,AGTR1
GO: Biological Process	GO:0040019	positive regulation of embryonic development	0.002574	2	36	PLCB1,FOXA2
GO: Biological Process	GO:0048675	axon extension	0.00264	3	132	NGF,BDNF,NRP2
GO: Biological Process	GO:0098916	anterograde trans-synaptic signaling	0.002666	6	678	NGF,PTN,CCL2,LPAR3,NTF3,BDNF
GO: Biological Process	GO:0007268	chemical synaptic transmission	0.002666	6	678	NGF,PTN,CCL2,LPAR3,NTF3,BDNF
GO: Biological Process	GO:0099537	trans-synaptic signaling	0.002666	6	678	NGF,PTN,CCL2,LPAR3,NTF3,BDNF
GO: Biological Process	GO:0071549	cellular response to dexamethasone stimulus	0.002717	2	37	CCL2,AGTR1
GO: Biological Process	GO:0002697	regulation of immune effector process	0.002741	5	466	GATA2,CCL2,C3,HTRA1,LEP
GO: Biological Process	GO:0090288	negative regulation of cellular response to growth factor stimulus	0.002813	3	135	THBS1,HTRA1,DCN
GO: Biological Process	GO:0007631	feeding behavior	0.002813	3	135	LEP,BDNF,AGTR1
GO: Biological Process	GO:0043270	positive regulation of ion transport	0.002862	4	284	PLCB1,CCL2,LPAR3,LEP
GO: Biological Process	GO:0010470	regulation of gastrulation	0.002865	2	38	SOX17,FOXA2
GO: Biological Process	GO:0030518	intracellular steroid hormone receptor signaling pathway	0.002873	3	136	ESR1,BDNF,PGR
GO: Biological Process	GO:0010976	positive regulation of neuron projection development	0.002935	4	286	NGF,PTN,LPAR3,BDNF
GO: Biological Process	GO:0007276	gamete generation	0.002951	6	692	SOX17,PLCB1,HOXA10,FST,LEP,PGR
GO: Biological Process	GO:0010596	negative regulation of endothelial cell migration	0.003015	2	39	THBS1,DCN
GO: Biological Process	GO:0071825	protein-lipid complex subunit organization	0.003015	2	39	PLA2G2A,AGTR1
GO: Biological Process	GO:0071496	cellular response to external stimulus	0.003085	4	290	PTN,AIF1,FOXA2,LEP
GO: Biological Process	GO:0071346	cellular response to interferon-gamma	0.003118	3	140	AIF1,CCL2,IRF6
GO: Biological Process	GO:0051302	regulation of cell division	0.003124	4	291	SOX17,PTN,PLCB1,ESR1
GO: Biological Process	GO:0043616	keratinocyte proliferation	0.00317	2	40	IRF6,FST
GO: Biological Process	GO:0050671	positive regulation of lymphocyte proliferation	0.003181	3	141	AIF1,LEP,TNFSF13B
GO: Biological Process	GO:0031214	biomineral tissue development	0.003245	3	142	PTN,LEP,PTH1R
GO: Biological Process	GO:0031175	neuron projection development	0.003286	7	953	NGF,PTN,LPAR3,CSF1R,NTF3,BDNF,NRP2
GO: Biological Process	GO:0032946	positive regulation of mononuclear cell proliferation	0.00331	3	143	AIF1,LEP,TNFSF13B
GO: Biological Process	GO:0035270	endocrine system development	0.00331	3	143	GATA2,FOXA2,PAX8
GO: Biological Process	GO:0090596	sensory organ morphogenesis	0.00332	4	296	GATA2,PTN,PAX8,BDNF
GO: Biological Process	GO:1990089	response to nerve growth factor	0.003328	2	41	NGF,PTN
GO: Biological Process	GO:0048662	negative regulation of smooth muscle cell proliferation	0.003328	2	41	AIF1,ESR1
GO: Biological Process	GO:0035924	cellular response to vascular endothelial growth factor stimulus	0.00349	2	42	DCN,NRP2
GO: Biological Process	GO:1903792	negative regulation of anion transport	0.00349	2	42	THBS1,LEP
GO: Biological Process	GO:0046883	regulation of hormone secretion	0.003567	4	302	FOXA2,PAX8,LEP,AGTR1
GO: Biological Process	GO:0048863	stem cell differentiation	0.003609	4	303	SOX17,FOXA2,PAX8,NRP2
GO: Biological Process	GO:0050890	cognition	0.003609	4	303	NGF,PTN,PLCB1,BDNF
GO: Biological Process	GO:0023061	signal release	0.003644	5	498	NGF,FOXA2,PAX8,LEP,AGTR1
GO: Biological Process	GO:0008360	regulation of cell shape	0.003645	3	148	PTN,CCL2,CSF1R
GO: Biological Process	GO:0045471	response to ethanol	0.003645	3	148	CCL2,PEMT,LEP
GO: Biological Process	GO:0043433	negative regulation of DNA-binding transcription factor activity	0.003645	3	148	FOXA2,PTGIS,ESR1
GO: Biological Process	GO:0072073	kidney epithelium development	0.003645	3	148	PAX8,BDNF,AGTR1
GO: Biological Process	GO:0071548	response to dexamethasone	0.003655	2	43	CCL2,AGTR1
GO: Biological Process	GO:0090207	regulation of triglyceride metabolic process	0.003655	2	43	C3,ESR1
GO: Biological Process	GO:0070665	positive regulation of leukocyte proliferation	0.003715	3	149	AIF1,LEP,TNFSF13B
GO: Biological Process	GO:0046173	polyol biosynthetic process	0.003824	2	44	LEP,PTH1R
GO: Biological Process	GO:2000401	regulation of lymphocyte migration	0.003824	2	44	AIF1,CCL2
GO: Biological Process	GO:0090184	positive regulation of kidney development	0.003824	2	44	PAX8,AGTR1
GO: Biological Process	GO:0007568	aging	0.003826	4	308	CCL2,MME,DCN,PTH1R
GO: Biological Process	GO:0051222	positive regulation of protein transport	0.003933	5	507	CCL2,CSF1R,PEMT,LEP,AGTR1
GO: Biological Process	GO:0051251	positive regulation of lymphocyte activation	0.00396	4	311	AIF1,CCL2,LEP,TNFSF13B
GO: Biological Process	GO:0060627	regulation of vesicle-mediated transport	0.003966	5	508	GATA2,PLCB1,CCL2,C3,NTF3
GO: Biological Process	GO:0071622	regulation of granulocyte chemotaxis	0.003997	2	45	CCL2,THBS1
GO: Biological Process	GO:1904036	negative regulation of epithelial cell apoptotic process	0.003997	2	45	NGF,PGR
GO: Biological Process	GO:0045773	positive regulation of axon extension	0.003997	2	45	NGF,BDNF
GO: Biological Process	GO:0048483	autonomic nervous system development	0.003997	2	45	NTF3,NRP2
GO: Biological Process	GO:0045892	negative regulation of transcription, DNA-templated	0.004031	8	1261	GATA2,SOX17,PLCB1,FOXA2,FST,PTGIS,LEP,ESR1
GO: Biological Process	GO:0008202	steroid metabolic process	0.004098	4	314	FOXA2,LEP,ESR1,AGTR1
GO: Biological Process	GO:0006650	glycerophospholipid metabolic process	0.004098	4	314	PLCB1,PLA2G2A,CSF1R,PEMT
GO: Biological Process	GO:0001990	regulation of systemic arterial blood pressure by hormone	0.004173	2	46	MME,AGTR1
GO: Biological Process	GO:0031529	ruffle organization	0.004173	2	46	AIF1,CSF1R
GO: Biological Process	GO:0021532	neural tube patterning	0.004173	2	46	SOX17,FOXA2
GO: Biological Process	GO:1990051	activation of protein kinase C activity	0.004184	1	2	LEP
GO: Biological Process	GO:2000594	positive regulation of metanephric DCT cell differentiation	0.004184	1	2	PAX8
GO: Biological Process	GO:0039003	pronephric field specification	0.004184	1	2	PAX8
GO: Biological Process	GO:1900204	apoptotic process involved in metanephric collecting duct development	0.004184	1	2	PAX8
GO: Biological Process	GO:2000592	regulation of metanephric DCT cell differentiation	0.004184	1	2	PAX8
GO: Biological Process	GO:0045014	carbon catabolite repression of transcription by glucose	0.004184	1	2	FOXA2
GO: Biological Process	GO:2000043	regulation of cardiac cell fate specification	0.004184	1	2	SOX17
GO: Biological Process	GO:0061193	taste bud development	0.004184	1	2	BDNF
GO: Biological Process	GO:0010752	regulation of cGMP-mediated signaling	0.004184	1	2	THBS1
GO: Biological Process	GO:0060587	regulation of lipoprotein lipid oxidation	0.004184	1	2	LEP
GO: Biological Process	GO:0072304	regulation of mesenchymal cell apoptotic process involved in metanephric nephron morphogenesis	0.004184	1	2	PAX8
GO: Biological Process	GO:0021649	vestibulocochlear nerve structural organization	0.004184	1	2	NRP2
GO: Biological Process	GO:1900215	negative regulation of apoptotic process involved in metanephric collecting duct development	0.004184	1	2	PAX8
GO: Biological Process	GO:0061552	ganglion morphogenesis	0.004184	1	2	NRP2
GO: Biological Process	GO:0060658	nipple morphogenesis	0.004184	1	2	RXFP1
GO: Biological Process	GO:1900217	regulation of apoptotic process involved in metanephric nephron tubule development	0.004184	1	2	PAX8
GO: Biological Process	GO:2000612	regulation of thyroid-stimulating hormone secretion	0.004184	1	2	PAX8
GO: Biological Process	GO:1900218	negative regulation of apoptotic process involved in metanephric nephron tubule development	0.004184	1	2	PAX8
GO: Biological Process	GO:1900205	apoptotic process involved in metanephric nephron tubule development	0.004184	1	2	PAX8
GO: Biological Process	GO:0072004	kidney field specification	0.004184	1	2	PAX8
GO: Biological Process	GO:0072305	negative regulation of mesenchymal cell apoptotic process involved in metanephric nephron morphogenesis	0.004184	1	2	PAX8
GO: Biological Process	GO:1901147	mesenchymal cell apoptotic process involved in metanephric nephron morphogenesis	0.004184	1	2	PAX8
GO: Biological Process	GO:2000485	regulation of glutamine transport	0.004184	1	2	LEP
GO: Biological Process	GO:0060427	lung connective tissue development	0.004184	1	2	RXFP1
GO: Biological Process	GO:1900214	regulation of apoptotic process involved in metanephric collecting duct development	0.004184	1	2	PAX8
GO: Biological Process	GO:0035854	eosinophil fate commitment	0.004184	1	2	GATA2
GO: Biological Process	GO:0038194	thyroid-stimulating hormone signaling pathway	0.004184	1	2	PAX8
GO: Biological Process	GO:0071403	cellular response to high density lipoprotein particle stimulus	0.004184	1	2	CCL2
GO: Biological Process	GO:0086097	phospholipase C-activating angiotensin-activated signaling pathway	0.004184	1	2	AGTR1
GO: Biological Process	GO:0045013	carbon catabolite repression of transcription	0.004184	1	2	FOXA2
GO: Biological Process	GO:0048866	stem cell fate specification	0.004184	1	2	SOX17
GO: Biological Process	GO:0034439	lipoprotein lipid oxidation	0.004184	1	2	LEP
GO: Biological Process	GO:0001970	positive regulation of activation of membrane attack complex	0.004184	1	2	C3
GO: Biological Process	GO:1904835	dorsal root ganglion morphogenesis	0.004184	1	2	NRP2
GO: Biological Process	GO:0060796	regulation of transcription involved in primary germ layer cell fate commitment	0.004184	1	2	SOX17
GO: Biological Process	GO:0039017	pattern specification involved in pronephros development	0.004184	1	2	PAX8
GO: Biological Process	GO:0060466	activation of meiosis involved in egg activation	0.004184	1	2	PLCB1
GO: Biological Process	GO:0007493	endodermal cell fate determination	0.004184	1	2	SOX17
GO: Biological Process	GO:0051235	maintenance of location	0.004191	4	316	MSR1,NGF,C3,LEP
GO: Biological Process	GO:0071417	cellular response to organonitrogen compound	0.004273	5	517	PLCB1,AIF1,CCL2,LEP,AGTR1
GO: Biological Process	GO:0000187	activation of MAPK activity	0.004301	3	157	LPAR3,THBS1,NTF3
GO: Biological Process	GO:0001775	cell activation	0.004311	7	1001	GATA2,PLCB1,AIF1,CCL2,THBS1,LEP,TNFSF13B
GO: Biological Process	GO:2000737	negative regulation of stem cell differentiation	0.004353	2	47	FOXA2,PAX8
GO: Biological Process	GO:0070661	leukocyte proliferation	0.004382	4	320	AIF1,CCL2,LEP,TNFSF13B
GO: Biological Process	GO:0071902	positive regulation of protein serine/threonine kinase activity	0.004431	4	321	LPAR3,THBS1,CSF1R,NTF3
GO: Biological Process	GO:0046165	alcohol biosynthetic process	0.004455	3	159	PEMT,LEP,PTH1R
GO: Biological Process	GO:0051726	regulation of cell cycle	0.004478	7	1008	PLCB1,AIF1,IRF6,THBS1,LEP,ESR1,DIRAS3
GO: Biological Process	GO:0010623	programmed cell death involved in cell development	0.004536	2	48	PAX8,BDNF
GO: Biological Process	GO:0071375	cellular response to peptide hormone stimulus	0.004579	4	324	PLCB1,CCL2,LEP,AGTR1
GO: Biological Process	GO:0006869	lipid transport	0.004579	4	324	MSR1,THBS1,LEP,AGTR1
GO: Biological Process	GO:0043491	protein kinase B signaling	0.004614	3	161	CCL2,THBS1,LEP
GO: Biological Process	GO:0014911	positive regulation of smooth muscle cell migration	0.004723	2	49	AIF1,PGR
GO: Biological Process	GO:0050863	regulation of T cell activation	0.00473	4	327	AIF1,CCL2,LEP,TNFSF13B
GO: Biological Process	GO:0043542	endothelial cell migration	0.004857	3	164	THBS1,DCN,NRP2
GO: Biological Process	GO:0051353	positive regulation of oxidoreductase activity	0.004913	2	50	ESR1,AGTR1
GO: Biological Process	GO:0002886	regulation of myeloid leukocyte mediated immunity	0.004913	2	50	GATA2,C3
GO: Biological Process	GO:1904407	positive regulation of nitric oxide metabolic process	0.004913	2	50	AIF1,ESR1
GO: Biological Process	GO:0050999	regulation of nitric-oxide synthase activity	0.004913	2	50	LEP,ESR1
GO: Biological Process	GO:0045429	positive regulation of nitric oxide biosynthetic process	0.004913	2	50	AIF1,ESR1
GO: Biological Process	GO:1903507	negative regulation of nucleic acid-templated transcription	0.004917	8	1303	GATA2,SOX17,PLCB1,FOXA2,FST,PTGIS,LEP,ESR1
GO: Biological Process	GO:0061351	neural precursor cell proliferation	0.005023	3	166	GATA2,EMX2,BDNF
GO: Biological Process	GO:1990138	neuron projection extension	0.005108	3	167	NGF,BDNF,NRP2
GO: Biological Process	GO:0008645	hexose transmembrane transport	0.005193	3	168	C3,LEP,ESR1
GO: Biological Process	GO:0009306	protein secretion	0.005213	5	542	CSF1R,FOXA2,LEP,TNFSF13B,AGTR1
GO: Biological Process	GO:1902679	negative regulation of RNA biosynthetic process	0.005267	8	1318	GATA2,SOX17,PLCB1,FOXA2,FST,PTGIS,LEP,ESR1
GO: Biological Process	GO:0090066	regulation of anatomical structure size	0.005295	5	544	NGF,LPAR3,LEP,BDNF,AGTR1
GO: Biological Process	GO:0071242	cellular response to ammonium ion	0.005304	2	52	PLCB1,AIF1
GO: Biological Process	GO:0016485	protein processing	0.005315	4	338	NGF,C3,THBS1,MME
GO: Biological Process	GO:0030902	hindbrain development	0.005367	3	170	GATA2,PTN,FOXA2
GO: Biological Process	GO:0030534	adult behavior	0.005367	3	170	NGF,FOXA2,LEP
GO: Biological Process	GO:0015749	monosaccharide transmembrane transport	0.005367	3	170	C3,LEP,ESR1
GO: Biological Process	GO:1901653	cellular response to peptide	0.005426	4	340	PLCB1,CCL2,LEP,AGTR1
GO: Biological Process	GO:1903037	regulation of leukocyte cell-cell adhesion	0.005482	4	341	AIF1,CCL2,LEP,TNFSF13B
GO: Biological Process	GO:0048247	lymphocyte chemotaxis	0.005505	2	53	CCL2,CXCL16
GO: Biological Process	GO:0007178	transmembrane receptor protein serine/threonine kinase signaling pathway	0.005596	4	343	CCL2,THBS1,HTRA1,FST
GO: Biological Process	GO:0042129	regulation of T cell proliferation	0.005633	3	173	AIF1,LEP,TNFSF13B
GO: Biological Process	GO:0010633	negative regulation of epithelial cell migration	0.005709	2	54	THBS1,DCN
GO: Biological Process	GO:0060359	response to ammonium ion	0.005709	2	54	PLCB1,AIF1
GO: Biological Process	GO:0032880	regulation of protein localization	0.005797	7	1057	PTN,CCL2,CSF1R,PEMT,FOXA2,LEP,AGTR1
GO: Biological Process	GO:0010632	regulation of epithelial cell migration	0.005815	3	175	THBS1,DCN,NRP2
GO: Biological Process	GO:0021543	pallium development	0.005815	3	175	PLCB1,EMX2,NRP2
GO: Biological Process	GO:0001667	ameboidal-type cell migration	0.005828	4	347	SOX17,THBS1,DCN,NRP2
GO: Biological Process	GO:0034110	regulation of homotypic cell-cell adhesion	0.005887	4	348	AIF1,CCL2,LEP,TNFSF13B
GO: Biological Process	GO:0046850	regulation of bone remodeling	0.005917	2	55	CSF1R,LEP
GO: Biological Process	GO:0010518	positive regulation of phospholipase activity	0.005917	2	55	ESR1,AGTR1
GO: Biological Process	GO:0003044	regulation of systemic arterial blood pressure mediated by a chemical signal	0.005917	2	55	MME,AGTR1
GO: Biological Process	GO:0050731	positive regulation of peptidyl-tyrosine phosphorylation	0.006001	3	177	CSF1R,NTF3,LEP
GO: Biological Process	GO:1903307	positive regulation of regulated secretory pathway	0.006128	2	56	GATA2,PLCB1
GO: Biological Process	GO:1904951	positive regulation of establishment of protein localization	0.006202	5	565	CCL2,CSF1R,PEMT,LEP,AGTR1
GO: Biological Process	GO:0000122	negative regulation of transcription by RNA polymerase II	0.006206	6	806	GATA2,SOX17,FOXA2,FST,LEP,ESR1
GO: Biological Process	GO:0030198	extracellular matrix organization	0.006249	4	354	THBS1,HTRA1,RXFP1,DCN
GO: Biological Process	GO:0010721	negative regulation of cell development	0.006249	4	354	PTN,FOXA2,PAX8,BDNF
GO: Biological Process	GO:0001828	inner cell mass cellular morphogenesis	0.00627	1	3	SOX17
GO: Biological Process	GO:0072003	kidney rudiment formation	0.00627	1	3	PAX8
GO: Biological Process	GO:0010751	negative regulation of nitric oxide mediated signal transduction	0.00627	1	3	THBS1
GO: Biological Process	GO:0045917	positive regulation of complement activation	0.00627	1	3	C3
GO: Biological Process	GO:0021888	hypothalamus gonadotrophin-releasing hormone neuron development	0.00627	1	3	NRP2
GO: Biological Process	GO:0090264	regulation of immune complex clearance by monocytes and macrophages	0.00627	1	3	CCL2
GO: Biological Process	GO:0060523	prostate epithelial cord elongation	0.00627	1	3	ESR1
GO: Biological Process	GO:0071349	cellular response to interleukin-12	0.00627	1	3	PLCB1
GO: Biological Process	GO:0021886	hypothalamus gonadotrophin-releasing hormone neuron differentiation	0.00627	1	3	NRP2
GO: Biological Process	GO:0072309	mesenchymal stem cell maintenance involved in metanephric nephron morphogenesis	0.00627	1	3	PAX8
GO: Biological Process	GO:0035722	interleukin-12-mediated signaling pathway	0.00627	1	3	PLCB1
GO: Biological Process	GO:0031548	regulation of brain-derived neurotrophic factor receptor signaling pathway	0.00627	1	3	BDNF
GO: Biological Process	GO:0072240	metanephric DCT cell differentiation	0.00627	1	3	PAX8
GO: Biological Process	GO:0061010	gall bladder development	0.00627	1	3	SOX17
GO: Biological Process	GO:0060912	cardiac cell fate specification	0.00627	1	3	SOX17
GO: Biological Process	GO:0071673	positive regulation of smooth muscle cell chemotaxis	0.00627	1	3	AIF1
GO: Biological Process	GO:2000502	negative regulation of natural killer cell chemotaxis	0.00627	1	3	CCL2
GO: Biological Process	GO:0021828	gonadotrophin-releasing hormone neuronal migration to the hypothalamus	0.00627	1	3	NRP2
GO: Biological Process	GO:2000259	positive regulation of protein activation cascade	0.00627	1	3	C3
GO: Biological Process	GO:0060618	nipple development	0.00627	1	3	RXFP1
GO: Biological Process	GO:0002581	negative regulation of antigen processing and presentation of peptide or polysaccharide antigen via MHC class II	0.00627	1	3	THBS1
GO: Biological Process	GO:0060748	tertiary branching involved in mammary gland duct morphogenesis	0.00627	1	3	PGR
GO: Biological Process	GO:1903375	facioacoustic ganglion development	0.00627	1	3	NRP2
GO: Biological Process	GO:2000437	regulation of monocyte extravasation	0.00627	1	3	PLCB1
GO: Biological Process	GO:0097374	sensory neuron axon guidance	0.00627	1	3	NRP2
GO: Biological Process	GO:0072069	DCT cell differentiation	0.00627	1	3	PAX8
GO: Biological Process	GO:0002436	immune complex clearance by monocytes and macrophages	0.00627	1	3	CCL2
GO: Biological Process	GO:0070460	thyroid-stimulating hormone secretion	0.00627	1	3	PAX8
GO: Biological Process	GO:0097187	dentinogenesis	0.00627	1	3	HTRA1
GO: Biological Process	GO:0014738	regulation of muscle hyperplasia	0.00627	1	3	AIF1
GO: Biological Process	GO:0090265	positive regulation of immune complex clearance by monocytes and macrophages	0.00627	1	3	CCL2
GO: Biological Process	GO:0000430	regulation of transcription from RNA polymerase II promoter by glucose	0.00627	1	3	FOXA2
GO: Biological Process	GO:0071492	cellular response to UV-A	0.00627	1	3	MME
GO: Biological Process	GO:0001969	regulation of activation of membrane attack complex	0.00627	1	3	C3
GO: Biological Process	GO:0007403	glial cell fate determination	0.00627	1	3	NTF3
GO: Biological Process	GO:0000432	positive regulation of transcription from RNA polymerase II promoter by glucose	0.00627	1	3	FOXA2
GO: Biological Process	GO:2000611	positive regulation of thyroid hormone generation	0.00627	1	3	PAX8
GO: Biological Process	GO:0071672	negative regulation of smooth muscle cell chemotaxis	0.00627	1	3	AIF1
GO: Biological Process	GO:0001905	activation of membrane attack complex	0.00627	1	3	C3
GO: Biological Process	GO:0021824	cerebral cortex tangential migration using cell-axon interactions	0.00627	1	3	NRP2
GO: Biological Process	GO:0051388	positive regulation of neurotrophin TRK receptor signaling pathway	0.00627	1	3	NGF
GO: Biological Process	GO:0021856	hypothalamic tangential migration using cell-axon interactions	0.00627	1	3	NRP2
GO: Biological Process	GO:0010725	regulation of primitive erythrocyte differentiation	0.00627	1	3	GATA2
GO: Biological Process	GO:0035684	helper T cell extravasation	0.00627	1	3	CCL2
GO: Biological Process	GO:0031296	B cell costimulation	0.00627	1	3	TNFSF13B
GO: Biological Process	GO:0031669	cellular response to nutrient levels	0.006286	3	180	PTN,FOXA2,LEP
GO: Biological Process	GO:0043062	extracellular structure organization	0.006311	4	355	THBS1,HTRA1,RXFP1,DCN
GO: Biological Process	GO:0018149	peptide cross-linking	0.006342	2	57	THBS1,DCN
GO: Biological Process	GO:0044060	regulation of endocrine process	0.006342	2	57	LEP,AGTR1
GO: Biological Process	GO:0032655	regulation of interleukin-12 production	0.006342	2	57	PLCB1,THBS1
GO: Biological Process	GO:0043405	regulation of MAP kinase activity	0.006373	4	356	NGF,LPAR3,THBS1,NTF3
GO: Biological Process	GO:0002443	leukocyte mediated immunity	0.006373	4	356	GATA2,CCL2,C3,LEP
GO: Biological Process	GO:0048771	tissue remodeling	0.006383	3	181	CSF1R,LEP,PTH1R
GO: Biological Process	GO:0042060	wound healing	0.006433	5	570	GATA2,C3,THBS1,FOXA2,DCN
GO: Biological Process	GO:0046879	hormone secretion	0.006436	4	357	FOXA2,PAX8,LEP,AGTR1
GO: Biological Process	GO:0051253	negative regulation of RNA metabolic process	0.00652	8	1366	GATA2,SOX17,PLCB1,FOXA2,FST,PTGIS,LEP,ESR1
GO: Biological Process	GO:0044283	small molecule biosynthetic process	0.006527	5	572	PEMT,DCN,PTGIS,LEP,PTH1R
GO: Biological Process	GO:0051223	regulation of protein transport	0.006544	6	815	CCL2,CSF1R,PEMT,FOXA2,LEP,AGTR1
GO: Biological Process	GO:0002274	myeloid leukocyte activation	0.006579	3	183	GATA2,AIF1,THBS1
GO: Biological Process	GO:0007179	transforming growth factor beta receptor signaling pathway	0.006678	3	184	CCL2,THBS1,HTRA1
GO: Biological Process	GO:0002699	positive regulation of immune effector process	0.006779	3	185	GATA2,CCL2,C3
GO: Biological Process	GO:1903428	positive regulation of reactive oxygen species biosynthetic process	0.006781	2	59	AIF1,ESR1
GO: Biological Process	GO:0003382	epithelial cell morphogenesis	0.006781	2	59	CLDN3,PAX8
GO: Biological Process	GO:0090183	regulation of kidney development	0.006781	2	59	PAX8,AGTR1
GO: Biological Process	GO:0007596	blood coagulation	0.00682	4	363	GATA2,C3,THBS1,FOXA2
GO: Biological Process	GO:0051336	regulation of hydrolase activity	0.006896	8	1379	NGF,PLCB1,CCL2,C3,THBS1,NTF3,ESR1,AGTR1
GO: Biological Process	GO:0010675	regulation of cellular carbohydrate metabolic process	0.006982	3	187	FOXA2,LEP,PTH1R
GO: Biological Process	GO:0060986	endocrine hormone secretion	0.007006	2	60	LEP,AGTR1
GO: Biological Process	GO:0048511	rhythmic process	0.007018	4	366	PTN,LEP,ESR1,PGR
GO: Biological Process	GO:0051604	protein maturation	0.007018	4	366	NGF,C3,THBS1,MME
GO: Biological Process	GO:0045321	leukocyte activation	0.007056	6	828	GATA2,AIF1,CCL2,THBS1,LEP,TNFSF13B
GO: Biological Process	GO:0031346	positive regulation of cell projection organization	0.007084	4	367	NGF,PTN,LPAR3,BDNF
GO: Biological Process	GO:0097164	ammonium ion metabolic process	0.007085	3	188	PLA2G2A,PEMT,AGTR1
GO: Biological Process	GO:0050770	regulation of axonogenesis	0.007085	3	188	NGF,LPAR3,BDNF
GO: Biological Process	GO:0007519	skeletal muscle tissue development	0.007085	3	188	SOX17,CSF1R,DCN
GO: Biological Process	GO:0007599	hemostasis	0.007152	4	368	GATA2,C3,THBS1,FOXA2
GO: Biological Process	GO:0050817	coagulation	0.007152	4	368	GATA2,C3,THBS1,FOXA2
GO: Biological Process	GO:0043401	steroid hormone mediated signaling pathway	0.007189	3	189	ESR1,BDNF,PGR
GO: Biological Process	GO:0032768	regulation of monooxygenase activity	0.007234	2	61	LEP,ESR1
GO: Biological Process	GO:0002548	monocyte chemotaxis	0.007234	2	61	AIF1,CCL2
GO: Biological Process	GO:1901992	positive regulation of mitotic cell cycle phase transition	0.007234	2	61	PLCB1,AIF1
GO: Biological Process	GO:0009914	hormone transport	0.007287	4	370	FOXA2,PAX8,LEP,AGTR1
GO: Biological Process	GO:1903708	positive regulation of hemopoiesis	0.0074	3	191	GATA2,CSF1R,LEP
GO: Biological Process	GO:0010959	regulation of metal ion transport	0.007564	4	374	NGF,PLCB1,CCL2,LPAR3
GO: Biological Process	GO:0060348	bone development	0.007614	3	193	THBS1,LEP,ESR1
GO: Biological Process	GO:0007423	sensory organ development	0.007628	5	594	GATA2,PTN,BNC2,PAX8,BDNF
GO: Biological Process	GO:0042531	positive regulation of tyrosine phosphorylation of STAT protein	0.0077	2	63	CSF1R,LEP
GO: Biological Process	GO:0042116	macrophage activation	0.0077	2	63	AIF1,THBS1
GO: Biological Process	GO:0050663	cytokine secretion	0.007723	3	194	CSF1R,LEP,AGTR1
GO: Biological Process	GO:0001658	branching involved in ureteric bud morphogenesis	0.007938	2	64	PAX8,AGTR1
GO: Biological Process	GO:0008217	regulation of blood pressure	0.008054	3	197	MME,LEP,AGTR1
GO: Biological Process	GO:0006109	regulation of carbohydrate metabolic process	0.008054	3	197	FOXA2,LEP,PTH1R
GO: Biological Process	GO:0051216	cartilage development	0.008054	3	197	THBS1,LEP,PTH1R
GO: Biological Process	GO:0060538	skeletal muscle organ development	0.008166	3	198	SOX17,CSF1R,DCN
GO: Biological Process	GO:1903829	positive regulation of cellular protein localization	0.008211	4	383	PTN,CCL2,PEMT,LEP
GO: Biological Process	GO:0008361	regulation of cell size	0.008279	3	199	NGF,LPAR3,BDNF
GO: Biological Process	GO:0030030	cell projection organization	0.008293	8	1423	NGF,PTN,AIF1,LPAR3,CSF1R,NTF3,BDNF,NRP2
GO: Biological Process	GO:0019953	sexual reproduction	0.008303	6	857	SOX17,PLCB1,HOXA10,FST,LEP,PGR
GO: Biological Process	GO:1900211	regulation of mesenchymal cell apoptotic process involved in metanephros development	0.008351	1	4	PAX8
GO: Biological Process	GO:0050747	positive regulation of lipoprotein metabolic process	0.008351	1	4	PEMT
GO: Biological Process	GO:1904393	regulation of skeletal muscle acetylcholine-gated channel clustering	0.008351	1	4	PTN
GO: Biological Process	GO:0001796	regulation of type IIa hypersensitivity	0.008351	1	4	C3
GO: Biological Process	GO:0046016	positive regulation of transcription by glucose	0.008351	1	4	FOXA2
GO: Biological Process	GO:0060221	retinal rod cell differentiation	0.008351	1	4	PTN
GO: Biological Process	GO:0042662	negative regulation of mesodermal cell fate specification	0.008351	1	4	SOX17
GO: Biological Process	GO:1904673	negative regulation of somatic stem cell population maintenance	0.008351	1	4	PAX8
GO: Biological Process	GO:1990791	dorsal root ganglion development	0.008351	1	4	NRP2
GO: Biological Process	GO:1904395	positive regulation of skeletal muscle acetylcholine-gated channel clustering	0.008351	1	4	PTN
GO: Biological Process	GO:0072040	negative regulation of mesenchymal cell apoptotic process involved in nephron morphogenesis	0.008351	1	4	PAX8
GO: Biological Process	GO:2001027	negative regulation of endothelial cell chemotaxis	0.008351	1	4	THBS1
GO: Biological Process	GO:0010748	negative regulation of plasma membrane long-chain fatty acid transport	0.008351	1	4	THBS1
GO: Biological Process	GO:0036484	trunk neural crest cell migration	0.008351	1	4	NRP2
GO: Biological Process	GO:0061031	endodermal digestive tract morphogenesis	0.008351	1	4	SOX17
GO: Biological Process	GO:1900212	negative regulation of mesenchymal cell apoptotic process involved in metanephros development	0.008351	1	4	PAX8
GO: Biological Process	GO:0033864	positive regulation of NAD(P)H oxidase activity	0.008351	1	4	AGTR1
GO: Biological Process	GO:0035290	trunk segmentation	0.008351	1	4	NRP2
GO: Biological Process	GO:0002445	type II hypersensitivity	0.008351	1	4	C3
GO: Biological Process	GO:0000436	carbon catabolite activation of transcription from RNA polymerase II promoter	0.008351	1	4	FOXA2
GO: Biological Process	GO:0001794	type IIa hypersensitivity	0.008351	1	4	C3
GO: Biological Process	GO:0014900	muscle hyperplasia	0.008351	1	4	AIF1
GO: Biological Process	GO:1901624	negative regulation of lymphocyte chemotaxis	0.008351	1	4	CCL2
GO: Biological Process	GO:0038108	negative regulation of appetite by leptin-mediated signaling pathway	0.008351	1	4	LEP
GO: Biological Process	GO:0009732	detection of hexose stimulus	0.008351	1	4	FOXA2
GO: Biological Process	GO:0072039	regulation of mesenchymal cell apoptotic process involved in nephron morphogenesis	0.008351	1	4	PAX8
GO: Biological Process	GO:0036486	ventral trunk neural crest cell migration	0.008351	1	4	NRP2
GO: Biological Process	GO:0021648	vestibulocochlear nerve morphogenesis	0.008351	1	4	NRP2
GO: Biological Process	GO:0097490	sympathetic neuron projection extension	0.008351	1	4	NRP2
GO: Biological Process	GO:0002894	positive regulation of type II hypersensitivity	0.008351	1	4	C3
GO: Biological Process	GO:0097491	sympathetic neuron projection guidance	0.008351	1	4	NRP2
GO: Biological Process	GO:0034287	detection of monosaccharide stimulus	0.008351	1	4	FOXA2
GO: Biological Process	GO:0060214	endocardium formation	0.008351	1	4	SOX17
GO: Biological Process	GO:0001798	positive regulation of type IIa hypersensitivity	0.008351	1	4	C3
GO: Biological Process	GO:0072289	metanephric nephron tubule formation	0.008351	1	4	PAX8
GO: Biological Process	GO:0035696	monocyte extravasation	0.008351	1	4	PLCB1
GO: Biological Process	GO:0090427	activation of meiosis	0.008351	1	4	PLCB1
GO: Biological Process	GO:0009730	detection of carbohydrate stimulus	0.008351	1	4	FOXA2
GO: Biological Process	GO:1904672	regulation of somatic stem cell population maintenance	0.008351	1	4	PAX8
GO: Biological Process	GO:0072108	positive regulation of mesenchymal to epithelial transition involved in metanephros morphogenesis	0.008351	1	4	PAX8
GO: Biological Process	GO:0000429	carbon catabolite regulation of transcription from RNA polymerase II promoter	0.008351	1	4	FOXA2
GO: Biological Process	GO:0060913	cardiac cell fate determination	0.008351	1	4	SOX17
GO: Biological Process	GO:0051594	detection of glucose	0.008351	1	4	FOXA2
GO: Biological Process	GO:0070672	response to interleukin-15	0.008351	1	4	PLCB1
GO: Biological Process	GO:0071315	cellular response to morphine	0.008351	1	4	AIF1
GO: Biological Process	GO:0002018	renin-angiotensin regulation of aldosterone production	0.008351	1	4	AGTR1
GO: Biological Process	GO:0060737	prostate gland morphogenetic growth	0.008351	1	4	ESR1
GO: Biological Process	GO:0071317	cellular response to isoquinoline alkaloid	0.008351	1	4	AIF1
GO: Biological Process	GO:0046449	creatinine metabolic process	0.008351	1	4	MME
GO: Biological Process	GO:0002434	immune complex clearance	0.008351	1	4	CCL2
GO: Biological Process	GO:0002892	regulation of type II hypersensitivity	0.008351	1	4	C3
GO: Biological Process	GO:0002019	regulation of renal output by angiotensin	0.008351	1	4	AGTR1
GO: Biological Process	GO:0072278	metanephric comma-shaped body morphogenesis	0.008351	1	4	PAX8
GO: Biological Process	GO:0070093	negative regulation of glucagon secretion	0.008351	1	4	LEP
GO: Biological Process	GO:0032455	nerve growth factor processing	0.008351	1	4	NGF
GO: Biological Process	GO:1901145	mesenchymal cell apoptotic process involved in nephron morphogenesis	0.008351	1	4	PAX8
GO: Biological Process	GO:0006114	glycerol biosynthetic process	0.008351	1	4	LEP
GO: Biological Process	GO:1900200	mesenchymal cell apoptotic process involved in metanephros development	0.008351	1	4	PAX8
GO: Biological Process	GO:0033686	positive regulation of luteinizing hormone secretion	0.008351	1	4	LEP
GO: Biological Process	GO:0007412	axon target recognition	0.008351	1	4	BDNF
GO: Biological Process	GO:0018108	peptidyl-tyrosine phosphorylation	0.008359	4	385	CSF1R,NTF3,LEP,AGTR1
GO: Biological Process	GO:0071385	cellular response to glucocorticoid stimulus	0.008424	2	66	CCL2,AGTR1
GO: Biological Process	GO:0009790	embryo development	0.008477	7	1135	GATA2,SOX17,PLCB1,HOXA10,FOXA2,PAX8,NRP2
GO: Biological Process	GO:0018212	peptidyl-tyrosine modification	0.008509	4	387	CSF1R,NTF3,LEP,AGTR1
GO: Biological Process	GO:0030099	myeloid cell differentiation	0.008585	4	388	GATA2,PLCB1,CSF1R,LEP
GO: Biological Process	GO:0046488	phosphatidylinositol metabolic process	0.008624	3	202	PLCB1,PLA2G2A,CSF1R
GO: Biological Process	GO:0045453	bone resorption	0.008671	2	67	CSF1R,PTH1R
GO: Biological Process	GO:1901989	positive regulation of cell cycle phase transition	0.008671	2	67	PLCB1,AIF1
GO: Biological Process	GO:0001910	regulation of leukocyte mediated cytotoxicity	0.008671	2	67	CCL2,LEP
GO: Biological Process	GO:0010517	regulation of phospholipase activity	0.008671	2	67	ESR1,AGTR1
GO: Biological Process	GO:0009880	embryonic pattern specification	0.008671	2	67	FOXA2,NRP2
GO: Biological Process	GO:0032890	regulation of organic acid transport	0.008923	2	68	THBS1,LEP
GO: Biological Process	GO:0060193	positive regulation of lipase activity	0.008923	2	68	ESR1,AGTR1
GO: Biological Process	GO:0045637	regulation of myeloid cell differentiation	0.008977	3	205	GATA2,CSF1R,LEP
GO: Biological Process	GO:0003151	outflow tract morphogenesis	0.009177	2	69	SOX17,THBS1
GO: Biological Process	GO:0048645	animal organ formation	0.009177	2	69	SOX17,PAX8
GO: Biological Process	GO:0032388	positive regulation of intracellular transport	0.009208	4	396	GATA2,CCL2,PEMT,LEP
GO: Biological Process	GO:0043086	negative regulation of catalytic activity	0.009252	6	877	NGF,PTN,C3,THBS1,FOXA2,DCN
GO: Biological Process	GO:0014706	striated muscle tissue development	0.009288	4	397	SOX17,CSF1R,DCN,BDNF
GO: Biological Process	GO:2000113	negative regulation of cellular macromolecule biosynthetic process	0.009325	8	1452	GATA2,SOX17,PLCB1,FOXA2,FST,PTGIS,LEP,ESR1
GO: Biological Process	GO:0032869	cellular response to insulin stimulus	0.009339	3	208	PLCB1,CCL2,LEP
GO: Biological Process	GO:0014068	positive regulation of phosphatidylinositol 3-kinase signaling	0.009434	2	70	DCN,LEP
GO: Biological Process	GO:0071384	cellular response to corticosteroid stimulus	0.009434	2	70	CCL2,AGTR1
GO: Biological Process	GO:0046470	phosphatidylcholine metabolic process	0.009434	2	70	PLA2G2A,PEMT
GO: Biological Process	GO:0060675	ureteric bud morphogenesis	0.009434	2	70	PAX8,AGTR1
GO: Biological Process	GO:0008643	carbohydrate transport	0.009461	3	209	C3,LEP,ESR1
GO: Biological Process	GO:0044106	cellular amine metabolic process	0.009461	3	209	PLA2G2A,PEMT,PAX8
GO: Biological Process	GO:0048839	inner ear development	0.009584	3	210	GATA2,PAX8,BDNF
GO: Biological Process	GO:0019637	organophosphate metabolic process	0.009678	7	1164	PLCB1,PLA2G2A,THBS1,CSF1R,PEMT,PTH1R,BDNF
GO: Biological Process	GO:0034109	homotypic cell-cell adhesion	0.009694	4	402	AIF1,CCL2,LEP,TNFSF13B
GO: Biological Process	GO:0014910	regulation of smooth muscle cell migration	0.009695	2	71	AIF1,PGR
GO: Biological Process	GO:0010595	positive regulation of endothelial cell migration	0.009695	2	71	THBS1,NRP2
GO: Biological Process	GO:0021885	forebrain cell migration	0.009695	2	71	EMX2,NRP2
GO: Biological Process	GO:0072171	mesonephric tubule morphogenesis	0.009695	2	71	PAX8,AGTR1
GO: Biological Process	GO:0043647	inositol phosphate metabolic process	0.009695	2	71	PLCB1,PTH1R
GO: Biological Process	GO:0001938	positive regulation of endothelial cell proliferation	0.009695	2	71	CCL2,NRP2
GO: Biological Process	GO:0001503	ossification	0.00986	4	404	PTN,LEP,PTH1R,ESR1
GO: Biological Process	GO:0071300	cellular response to retinoic acid	0.009959	2	72	CCL2,LEP
GO: Biological Process	GO:0070201	regulation of establishment of protein localization	0.01006	6	893	CCL2,CSF1R,PEMT,FOXA2,LEP,AGTR1
GO: Biological Process	GO:0002573	myeloid leukocyte differentiation	0.01022	3	215	GATA2,PLCB1,CSF1R
GO: Biological Process	GO:0042098	T cell proliferation	0.01022	3	215	AIF1,LEP,TNFSF13B
GO: Biological Process	GO:0034644	cellular response to UV	0.01023	2	73	PTN,MME
GO: Biological Process	GO:0014042	positive regulation of neuron maturation	0.01043	1	5	NGF
GO: Biological Process	GO:0010749	regulation of nitric oxide mediated signal transduction	0.01043	1	5	THBS1
GO: Biological Process	GO:0021855	hypothalamus cell migration	0.01043	1	5	NRP2
GO: Biological Process	GO:1902455	negative regulation of stem cell population maintenance	0.01043	1	5	PAX8
GO: Biological Process	GO:0072221	metanephric distal convoluted tubule development	0.01043	1	5	PAX8
GO: Biological Process	GO:0003308	negative regulation of Wnt signaling pathway involved in heart development	0.01043	1	5	SOX17
GO: Biological Process	GO:2000609	regulation of thyroid hormone generation	0.01043	1	5	PAX8
GO: Biological Process	GO:1901166	neural crest cell migration involved in autonomic nervous system development	0.01043	1	5	NRP2
GO: Biological Process	GO:1900747	negative regulation of vascular endothelial growth factor signaling pathway	0.01043	1	5	DCN
GO: Biological Process	GO:1901628	positive regulation of postsynaptic membrane organization	0.01043	1	5	PTN
GO: Biological Process	GO:0048865	stem cell fate commitment	0.01043	1	5	SOX17
GO: Biological Process	GO:1903911	positive regulation of receptor clustering	0.01043	1	5	PTN
GO: Biological Process	GO:0060750	epithelial cell proliferation involved in mammary gland duct elongation	0.01043	1	5	ESR1
GO: Biological Process	GO:0070671	response to interleukin-12	0.01043	1	5	PLCB1
GO: Biological Process	GO:0030222	eosinophil differentiation	0.01043	1	5	GATA2
GO: Biological Process	GO:1904398	positive regulation of neuromuscular junction development	0.01043	1	5	PTN
GO: Biological Process	GO:0038145	macrophage colony-stimulating factor signaling pathway	0.01043	1	5	CSF1R
GO: Biological Process	GO:0010757	negative regulation of plasminogen activation	0.01043	1	5	THBS1
GO: Biological Process	GO:0072025	distal convoluted tubule development	0.01043	1	5	PAX8
GO: Biological Process	GO:0061551	trigeminal ganglion development	0.01043	1	5	NRP2
GO: Biological Process	GO:2000977	regulation of forebrain neuron differentiation	0.01043	1	5	GATA2
GO: Biological Process	GO:0034442	regulation of lipoprotein oxidation	0.01043	1	5	LEP
GO: Biological Process	GO:0002636	positive regulation of germinal center formation	0.01043	1	5	TNFSF13B
GO: Biological Process	GO:0038001	paracrine signaling	0.01043	1	5	PGR
GO: Biological Process	GO:0045991	carbon catabolite activation of transcription	0.01043	1	5	FOXA2
GO: Biological Process	GO:0072338	cellular lactam metabolic process	0.01043	1	5	MME
GO: Biological Process	GO:0032417	positive regulation of sodium:proton antiporter activity	0.01043	1	5	PLCB1
GO: Biological Process	GO:0019401	alditol biosynthetic process	0.01043	1	5	LEP
GO: Biological Process	GO:0071671	regulation of smooth muscle cell chemotaxis	0.01043	1	5	AIF1
GO: Biological Process	GO:2000491	positive regulation of hepatic stellate cell activation	0.01043	1	5	LEP
GO: Biological Process	GO:0009968	negative regulation of signal transduction	0.01044	7	1181	GATA2,SOX17,THBS1,HTRA1,DCN,FST,ESR1
GO: Biological Process	GO:0030301	cholesterol transport	0.0105	2	74	MSR1,LEP
GO: Biological Process	GO:0009308	amine metabolic process	0.01061	3	218	PLA2G2A,PEMT,PAX8
GO: Biological Process	GO:0048858	cell projection morphogenesis	0.01065	6	904	NGF,LPAR3,CSF1R,NTF3,BDNF,NRP2
GO: Biological Process	GO:0033043	regulation of organelle organization	0.01067	7	1186	GATA2,PLCB1,CSF1R,PEMT,DCN,NTF3,ESR1
GO: Biological Process	GO:0046324	regulation of glucose import	0.01077	2	75	LEP,ESR1
GO: Biological Process	GO:0015918	sterol transport	0.01077	2	75	MSR1,LEP
GO: Biological Process	GO:0060537	muscle tissue development	0.0108	4	415	SOX17,CSF1R,DCN,BDNF
GO: Biological Process	GO:0048598	embryonic morphogenesis	0.01087	5	648	GATA2,SOX17,HOXA10,FOXA2,PAX8
GO: Biological Process	GO:0043065	positive regulation of apoptotic process	0.01094	5	649	NGF,PTN,THBS1,PTGIS,LEP
GO: Biological Process	GO:0050670	regulation of lymphocyte proliferation	0.011	3	221	AIF1,LEP,TNFSF13B
GO: Biological Process	GO:0090092	regulation of transmembrane receptor protein serine/threonine kinase signaling pathway	0.01114	3	222	THBS1,HTRA1,FST
GO: Biological Process	GO:0032944	regulation of mononuclear cell proliferation	0.01127	3	223	AIF1,LEP,TNFSF13B
GO: Biological Process	GO:0035019	somatic stem cell population maintenance	0.01133	2	77	GATA2,PAX8
GO: Biological Process	GO:0014909	smooth muscle cell migration	0.01133	2	77	AIF1,PGR
GO: Biological Process	GO:0042509	regulation of tyrosine phosphorylation of STAT protein	0.01133	2	77	CSF1R,LEP
GO: Biological Process	GO:0043068	positive regulation of programmed cell death	0.01135	5	655	NGF,PTN,THBS1,PTGIS,LEP
GO: Biological Process	GO:0045444	fat cell differentiation	0.01155	3	225	GATA2,PLCB1,LEP
GO: Biological Process	GO:0045934	negative regulation of nucleobase-containing compound metabolic process	0.01159	8	1508	GATA2,SOX17,PLCB1,FOXA2,FST,PTGIS,LEP,ESR1
GO: Biological Process	GO:0034103	regulation of tissue remodeling	0.01161	2	78	CSF1R,LEP
GO: Biological Process	GO:0042490	mechanoreceptor differentiation	0.01161	2	78	NTF3,BDNF
GO: Biological Process	GO:0048663	neuron fate commitment	0.01161	2	78	GATA2,FOXA2
GO: Biological Process	GO:0006644	phospholipid metabolic process	0.01171	4	425	PLCB1,PLA2G2A,CSF1R,PEMT
GO: Biological Process	GO:0032990	cell part morphogenesis	0.01184	6	925	NGF,LPAR3,CSF1R,NTF3,BDNF,NRP2
GO: Biological Process	GO:0072078	nephron tubule morphogenesis	0.01189	2	79	PAX8,AGTR1
GO: Biological Process	GO:0051345	positive regulation of hydrolase activity	0.01208	6	929	NGF,PLCB1,CCL2,NTF3,ESR1,AGTR1
GO: Biological Process	GO:0009755	hormone-mediated signaling pathway	0.01211	3	229	ESR1,BDNF,PGR
GO: Biological Process	GO:0031341	regulation of cell killing	0.01218	2	80	CCL2,LEP
GO: Biological Process	GO:0007422	peripheral nervous system development	0.01218	2	80	NGF,NTF3
GO: Biological Process	GO:0008610	lipid biosynthetic process	0.01221	5	667	PLA2G2A,C3,PEMT,PTGIS,LEP
GO: Biological Process	GO:0071560	cellular response to transforming growth factor beta stimulus	0.01225	3	230	CCL2,THBS1,HTRA1
GO: Biological Process	GO:0045216	cell-cell junction organization	0.01225	3	230	THBS1,CLDN3,CSF1R
GO: Biological Process	GO:0019229	regulation of vasoconstriction	0.01248	2	81	LEP,AGTR1
GO: Biological Process	GO:0007260	tyrosine phosphorylation of STAT protein	0.01248	2	81	CSF1R,LEP
GO: Biological Process	GO:0007189	adenylate cyclase-activating G protein-coupled receptor signaling pathway	0.01248	2	81	RXFP1,PTH1R
GO: Biological Process	GO:0072088	nephron epithelium morphogenesis	0.01248	2	81	PAX8,AGTR1
GO: Biological Process	GO:0010746	regulation of plasma membrane long-chain fatty acid transport	0.0125	1	6	THBS1
GO: Biological Process	GO:2000324	positive regulation of glucocorticoid receptor signaling pathway	0.0125	1	6	BDNF
GO: Biological Process	GO:0060751	branch elongation involved in mammary gland duct branching	0.0125	1	6	ESR1
GO: Biological Process	GO:0080154	regulation of fertilization	0.0125	1	6	PLCB1
GO: Biological Process	GO:0021825	substrate-dependent cerebral cortex tangential migration	0.0125	1	6	NRP2
GO: Biological Process	GO:0002580	regulation of antigen processing and presentation of peptide or polysaccharide antigen via MHC class II	0.0125	1	6	THBS1
GO: Biological Process	GO:0061550	cranial ganglion development	0.0125	1	6	NRP2
GO: Biological Process	GO:0002034	regulation of blood vessel diameter by renin-angiotensin	0.0125	1	6	AGTR1
GO: Biological Process	GO:0002578	negative regulation of antigen processing and presentation	0.0125	1	6	THBS1
GO: Biological Process	GO:0072049	comma-shaped body morphogenesis	0.0125	1	6	PAX8
GO: Biological Process	GO:0032914	positive regulation of transforming growth factor beta1 production	0.0125	1	6	THBS1
GO: Biological Process	GO:0045990	carbon catabolite regulation of transcription	0.0125	1	6	FOXA2
GO: Biological Process	GO:0046668	regulation of retinal cell programmed cell death	0.0125	1	6	BDNF
GO: Biological Process	GO:0043652	engulfment of apoptotic cell	0.0125	1	6	THBS1
GO: Biological Process	GO:1903799	negative regulation of production of miRNAs involved in gene silencing by miRNA	0.0125	1	6	ESR1
GO: Biological Process	GO:0006868	glutamine transport	0.0125	1	6	LEP
GO: Biological Process	GO:0046015	regulation of transcription by glucose	0.0125	1	6	FOXA2
GO: Biological Process	GO:2000347	positive regulation of hepatocyte proliferation	0.0125	1	6	PTN
GO: Biological Process	GO:0060718	chorionic trophoblast cell differentiation	0.0125	1	6	HTRA1
GO: Biological Process	GO:0060319	primitive erythrocyte differentiation	0.0125	1	6	GATA2
GO: Biological Process	GO:0001705	ectoderm formation	0.0125	1	6	FOXA2
GO: Biological Process	GO:0072174	metanephric tubule formation	0.0125	1	6	PAX8
GO: Biological Process	GO:0060956	endocardial cell differentiation	0.0125	1	6	SOX17
GO: Biological Process	GO:0050847	progesterone receptor signaling pathway	0.0125	1	6	PGR
GO: Biological Process	GO:0072284	metanephric S-shaped body morphogenesis	0.0125	1	6	PAX8
GO: Biological Process	GO:0032430	positive regulation of phospholipase A2 activity	0.0125	1	6	AGTR1
GO: Biological Process	GO:0042160	lipoprotein modification	0.0125	1	6	LEP
GO: Biological Process	GO:0045764	positive regulation of cellular amino acid metabolic process	0.0125	1	6	PAX8
GO: Biological Process	GO:0042161	lipoprotein oxidation	0.0125	1	6	LEP
GO: Biological Process	GO:1902548	negative regulation of cellular response to vascular endothelial growth factor stimulus	0.0125	1	6	DCN
GO: Biological Process	GO:0003072	renal control of peripheral vascular resistance involved in regulation of systemic arterial blood pressure	0.0125	1	6	AGTR1
GO: Biological Process	GO:0014744	positive regulation of muscle adaptation	0.0125	1	6	AIF1
GO: Biological Process	GO:0032386	regulation of intracellular transport	0.01251	5	671	GATA2,NGF,CCL2,PEMT,LEP
GO: Biological Process	GO:0043406	positive regulation of MAP kinase activity	0.01254	3	232	LPAR3,THBS1,NTF3
GO: Biological Process	GO:0071559	response to transforming growth factor beta	0.01268	3	233	CCL2,THBS1,HTRA1
GO: Biological Process	GO:0010631	epithelial cell migration	0.01298	3	235	THBS1,DCN,NRP2
GO: Biological Process	GO:0090276	regulation of peptide hormone secretion	0.01298	3	235	FOXA2,PAX8,LEP
GO: Biological Process	GO:0010558	negative regulation of macromolecule biosynthetic process	0.01306	8	1540	GATA2,SOX17,PLCB1,FOXA2,FST,PTGIS,LEP,ESR1
GO: Biological Process	GO:0072028	nephron morphogenesis	0.01307	2	83	PAX8,AGTR1
GO: Biological Process	GO:0009612	response to mechanical stimulus	0.01313	3	236	CCL2,THBS1,DCN
GO: Biological Process	GO:0002520	immune system development	0.01332	6	949	GATA2,PLCB1,C3,CSF1R,FST,LEP
GO: Biological Process	GO:0043434	response to peptide hormone	0.01337	4	442	PLCB1,CCL2,LEP,AGTR1
GO: Biological Process	GO:0061333	renal tubule morphogenesis	0.01337	2	84	PAX8,AGTR1
GO: Biological Process	GO:0001894	tissue homeostasis	0.01343	3	238	GATA2,CSF1R,PTH1R
GO: Biological Process	GO:0090132	epithelium migration	0.01343	3	238	THBS1,DCN,NRP2
GO: Biological Process	GO:0018193	peptidyl-amino acid modification	0.01348	7	1241	GATA2,CSF1R,DCN,NTF3,LEP,BDNF,AGTR1
GO: Biological Process	GO:0050708	regulation of protein secretion	0.01357	4	444	CSF1R,FOXA2,LEP,AGTR1
GO: Biological Process	GO:0043583	ear development	0.01358	3	239	GATA2,PAX8,BDNF
GO: Biological Process	GO:0051249	regulation of lymphocyte activation	0.01367	4	445	AIF1,CCL2,LEP,TNFSF13B
GO: Biological Process	GO:0002824	positive regulation of adaptive immune response based on somatic recombination of immune receptors built from immunoglobulin superfamily domains	0.01367	2	85	C3,TNFSF13B
GO: Biological Process	GO:0050730	regulation of peptidyl-tyrosine phosphorylation	0.01373	3	240	CSF1R,NTF3,LEP
GO: Biological Process	GO:0002791	regulation of peptide secretion	0.01373	3	240	FOXA2,PAX8,LEP
GO: Biological Process	GO:0045017	glycerolipid biosynthetic process	0.01388	3	241	PLA2G2A,C3,PEMT
GO: Biological Process	GO:0051924	regulation of calcium ion transport	0.01419	3	243	NGF,CCL2,LPAR3
GO: Biological Process	GO:0060191	regulation of lipase activity	0.01429	2	87	ESR1,AGTR1
GO: Biological Process	GO:0090130	tissue migration	0.01435	3	244	THBS1,DCN,NRP2
GO: Biological Process	GO:0010942	positive regulation of cell death	0.01438	5	695	NGF,PTN,THBS1,PTGIS,LEP
GO: Biological Process	GO:0010951	negative regulation of endopeptidase activity	0.01451	3	245	NGF,C3,THBS1
GO: Biological Process	GO:0021979	hypothalamus cell differentiation	0.01457	1	7	NRP2
GO: Biological Process	GO:0031547	brain-derived neurotrophic factor receptor signaling pathway	0.01457	1	7	BDNF
GO: Biological Process	GO:0019800	peptide cross-linking via chondroitin 4-sulfate glycosaminoglycan	0.01457	1	7	DCN
GO: Biological Process	GO:0072683	T cell extravasation	0.01457	1	7	CCL2
GO: Biological Process	GO:0070345	negative regulation of fat cell proliferation	0.01457	1	7	GATA2
GO: Biological Process	GO:2000675	negative regulation of type B pancreatic cell apoptotic process	0.01457	1	7	NGF
GO: Biological Process	GO:0060526	prostate glandular acinus morphogenesis	0.01457	1	7	ESR1
GO: Biological Process	GO:0035931	mineralocorticoid secretion	0.01457	1	7	AGTR1
GO: Biological Process	GO:1903909	regulation of receptor clustering	0.01457	1	7	PTN
GO: Biological Process	GO:0042661	regulation of mesodermal cell fate specification	0.01457	1	7	SOX17
GO: Biological Process	GO:0003307	regulation of Wnt signaling pathway involved in heart development	0.01457	1	7	SOX17
GO: Biological Process	GO:0033591	response to L-ascorbic acid	0.01457	1	7	LEP
GO: Biological Process	GO:0046881	positive regulation of follicle-stimulating hormone secretion	0.01457	1	7	LEP
GO: Biological Process	GO:2000855	regulation of mineralocorticoid secretion	0.01457	1	7	AGTR1
GO: Biological Process	GO:2000402	negative regulation of lymphocyte migration	0.01457	1	7	CCL2
GO: Biological Process	GO:0060011	Sertoli cell proliferation	0.01457	1	7	ESR1
GO: Biological Process	GO:0060527	prostate epithelial cord arborization involved in prostate glandular acinus morphogenesis	0.01457	1	7	ESR1
GO: Biological Process	GO:0072257	metanephric nephron tubule epithelial cell differentiation	0.01457	1	7	PAX8
GO: Biological Process	GO:0010886	positive regulation of cholesterol storage	0.01457	1	7	MSR1
GO: Biological Process	GO:0002001	renin secretion into blood stream	0.01457	1	7	AGTR1
GO: Biological Process	GO:0072307	regulation of metanephric nephron tubule epithelial cell differentiation	0.01457	1	7	PAX8
GO: Biological Process	GO:2000035	regulation of stem cell division	0.01457	1	7	SOX17
GO: Biological Process	GO:0003160	endocardium morphogenesis	0.01457	1	7	SOX17
GO: Biological Process	GO:1902338	negative regulation of apoptotic process involved in morphogenesis	0.01457	1	7	PAX8
GO: Biological Process	GO:2000858	regulation of aldosterone secretion	0.01457	1	7	AGTR1
GO: Biological Process	GO:0021902	commitment of neuronal cell to specific neuron type in forebrain	0.01457	1	7	GATA2
GO: Biological Process	GO:0007185	transmembrane receptor protein tyrosine phosphatase signaling pathway	0.01457	1	7	PTN
GO: Biological Process	GO:0072235	metanephric distal tubule development	0.01457	1	7	PAX8
GO: Biological Process	GO:0021562	vestibulocochlear nerve development	0.01457	1	7	NRP2
GO: Biological Process	GO:0006769	nicotinamide metabolic process	0.01457	1	7	PTGIS
GO: Biological Process	GO:0007406	negative regulation of neuroblast proliferation	0.01457	1	7	BDNF
GO: Biological Process	GO:0035932	aldosterone secretion	0.01457	1	7	AGTR1
GO: Biological Process	GO:0072038	mesenchymal stem cell maintenance involved in nephron morphogenesis	0.01457	1	7	PAX8
GO: Biological Process	GO:2000049	positive regulation of cell-cell adhesion mediated by cadherin	0.01457	1	7	FOXA2
GO: Biological Process	GO:0032415	regulation of sodium:proton antiporter activity	0.01457	1	7	PLCB1
GO: Biological Process	GO:0071670	smooth muscle cell chemotaxis	0.01457	1	7	AIF1
GO: Biological Process	GO:0060687	regulation of branching involved in prostate gland morphogenesis	0.01457	1	7	ESR1
GO: Biological Process	GO:0046323	glucose import	0.01461	2	88	LEP,ESR1
GO: Biological Process	GO:0034765	regulation of ion transmembrane transport	0.01473	4	455	NGF,PLCB1,CCL2,THBS1
GO: Biological Process	GO:0006575	cellular modified amino acid metabolic process	0.01482	3	247	PLA2G2A,PEMT,PAX8
GO: Biological Process	GO:0051091	positive regulation of DNA-binding transcription factor activity	0.01482	3	247	NGF,ESR1,BDNF
GO: Biological Process	GO:1901655	cellular response to ketone	0.01492	2	89	CCL2,AGTR1
GO: Biological Process	GO:0001708	cell fate specification	0.01492	2	89	SOX17,FOXA2
GO: Biological Process	GO:0051897	positive regulation of protein kinase B signaling	0.01492	2	89	THBS1,LEP
GO: Biological Process	GO:0014812	muscle cell migration	0.01492	2	89	AIF1,PGR
GO: Biological Process	GO:0031532	actin cytoskeleton reorganization	0.01524	2	90	CSF1R,NTF3
GO: Biological Process	GO:0098609	cell-cell adhesion	0.01541	6	980	AIF1,CCL2,CLDN3,FOXA2,LEP,TNFSF13B
GO: Biological Process	GO:0070613	regulation of protein processing	0.01556	2	91	C3,THBS1
GO: Biological Process	GO:0015908	fatty acid transport	0.01556	2	91	THBS1,LEP
GO: Biological Process	GO:0002444	myeloid leukocyte mediated immunity	0.01589	2	92	GATA2,C3
GO: Biological Process	GO:0042475	odontogenesis of dentin-containing tooth	0.01589	2	92	HTRA1,FST
GO: Biological Process	GO:1900046	regulation of hemostasis	0.01589	2	92	THBS1,FOXA2
GO: Biological Process	GO:0022617	extracellular matrix disassembly	0.01589	2	92	HTRA1,DCN
GO: Biological Process	GO:0030193	regulation of blood coagulation	0.01589	2	92	THBS1,FOXA2
GO: Biological Process	GO:0002821	positive regulation of adaptive immune response	0.01589	2	92	C3,TNFSF13B
GO: Biological Process	GO:1903317	regulation of protein maturation	0.01589	2	92	C3,THBS1
GO: Biological Process	GO:0042439	ethanolamine-containing compound metabolic process	0.01622	2	93	PLA2G2A,PEMT
GO: Biological Process	GO:0033555	multicellular organismal response to stress	0.01622	2	93	THBS1,BDNF
GO: Biological Process	GO:0008625	extrinsic apoptotic signaling pathway via death domain receptors	0.01622	2	93	NGF,THBS1
GO: Biological Process	GO:0045921	positive regulation of exocytosis	0.01622	2	93	GATA2,PLCB1
GO: Biological Process	GO:0031327	negative regulation of cellular biosynthetic process	0.01646	8	1605	GATA2,SOX17,PLCB1,FOXA2,FST,PTGIS,LEP,ESR1
GO: Biological Process	GO:0010466	negative regulation of peptidase activity	0.01647	3	257	NGF,C3,THBS1
GO: Biological Process	GO:1904396	regulation of neuromuscular junction development	0.01663	1	8	PTN
GO: Biological Process	GO:0003348	cardiac endothelial cell differentiation	0.01663	1	8	SOX17
GO: Biological Process	GO:0071447	cellular response to hydroperoxide	0.01663	1	8	AIF1
GO: Biological Process	GO:0060965	negative regulation of gene silencing by miRNA	0.01663	1	8	ESR1
GO: Biological Process	GO:0072282	metanephric nephron tubule morphogenesis	0.01663	1	8	PAX8
GO: Biological Process	GO:0002035	brain renin-angiotensin system	0.01663	1	8	AGTR1
GO: Biological Process	GO:0015911	plasma membrane long-chain fatty acid transport	0.01663	1	8	THBS1
GO: Biological Process	GO:0032278	positive regulation of gonadotropin secretion	0.01663	1	8	LEP
GO: Biological Process	GO:0072050	S-shaped body morphogenesis	0.01663	1	8	PAX8
GO: Biological Process	GO:0034351	negative regulation of glial cell apoptotic process	0.01663	1	8	CCL2
GO: Biological Process	GO:0009996	negative regulation of cell fate specification	0.01663	1	8	SOX17
GO: Biological Process	GO:2000489	regulation of hepatic stellate cell activation	0.01663	1	8	LEP
GO: Biological Process	GO:0001826	inner cell mass cell differentiation	0.01663	1	8	SOX17
GO: Biological Process	GO:0007343	egg activation	0.01663	1	8	PLCB1
GO: Biological Process	GO:0002604	regulation of dendritic cell antigen processing and presentation	0.01663	1	8	THBS1
GO: Biological Process	GO:1903960	negative regulation of anion transmembrane transport	0.01663	1	8	THBS1
GO: Biological Process	GO:0030300	regulation of intestinal cholesterol absorption	0.01663	1	8	LEP
GO: Biological Process	GO:1903431	positive regulation of cell maturation	0.01663	1	8	NGF
GO: Biological Process	GO:2000542	negative regulation of gastrulation	0.01663	1	8	SOX17
GO: Biological Process	GO:0070141	response to UV-A	0.01663	1	8	MME
GO: Biological Process	GO:0001999	renal response to blood flow involved in circulatory renin-angiotensin regulation of systemic arterial blood pressure	0.01663	1	8	AGTR1
GO: Biological Process	GO:0032229	negative regulation of synaptic transmission, GABAergic	0.01663	1	8	BDNF
GO: Biological Process	GO:0071493	cellular response to UV-B	0.01663	1	8	MME
GO: Biological Process	GO:0072201	negative regulation of mesenchymal cell proliferation	0.01663	1	8	PTN
GO: Biological Process	GO:0034392	negative regulation of smooth muscle cell apoptotic process	0.01663	1	8	AGTR1
GO: Biological Process	GO:0061009	common bile duct development	0.01663	1	8	SOX17
GO: Biological Process	GO:0048170	positive regulation of long-term neuronal synaptic plasticity	0.01663	1	8	BDNF
GO: Biological Process	GO:0045650	negative regulation of macrophage differentiation	0.01663	1	8	GATA2
GO: Biological Process	GO:1904746	negative regulation of apoptotic process involved in development	0.01663	1	8	PAX8
GO: Biological Process	GO:0033860	regulation of NAD(P)H oxidase activity	0.01663	1	8	AGTR1
GO: Biological Process	GO:0002885	positive regulation of hypersensitivity	0.01663	1	8	C3
GO: Biological Process	GO:0002692	negative regulation of cellular extravasation	0.01663	1	8	PLCB1
GO: Biological Process	GO:2000381	negative regulation of mesoderm development	0.01663	1	8	SOX17
GO: Biological Process	GO:0072205	metanephric collecting duct development	0.01663	1	8	PAX8
GO: Biological Process	GO:0034330	cell junction organization	0.01664	3	258	THBS1,CLDN3,CSF1R
GO: Biological Process	GO:0034762	regulation of transmembrane transport	0.01675	4	473	NGF,PLCB1,CCL2,THBS1
GO: Biological Process	GO:0033138	positive regulation of peptidyl-serine phosphorylation	0.01688	2	95	NTF3,BDNF
GO: Biological Process	GO:2000177	regulation of neural precursor cell proliferation	0.01688	2	95	GATA2,BDNF
GO: Biological Process	GO:0019752	carboxylic acid metabolic process	0.0171	6	1003	C3,PEMT,DCN,PAX8,PTGIS,LEP
GO: Biological Process	GO:0043154	negative regulation of cysteine-type endopeptidase activity involved in apoptotic process	0.01722	2	96	NGF,THBS1
GO: Biological Process	GO:0050818	regulation of coagulation	0.01722	2	96	THBS1,FOXA2
GO: Biological Process	GO:1901652	response to peptide	0.01723	4	477	PLCB1,CCL2,LEP,AGTR1
GO: Biological Process	GO:0015850	organic hydroxy compound transport	0.01733	3	262	MSR1,LEP,AGTR1
GO: Biological Process	GO:0072080	nephron tubule development	0.0179	2	98	PAX8,AGTR1
GO: Biological Process	GO:0048010	vascular endothelial growth factor receptor signaling pathway	0.0179	2	98	CCL2,NRP2
GO: Biological Process	GO:0032868	response to insulin	0.01803	3	266	PLCB1,CCL2,LEP
GO: Biological Process	GO:0034612	response to tumor necrosis factor	0.01821	3	267	CCL2,CXCL16,TNFSF13B
GO: Biological Process	GO:0009890	negative regulation of biosynthetic process	0.01823	8	1635	GATA2,SOX17,PLCB1,FOXA2,FST,PTGIS,LEP,ESR1
GO: Biological Process	GO:2000117	negative regulation of cysteine-type endopeptidase activity	0.01824	2	99	NGF,THBS1
GO: Biological Process	GO:0051172	negative regulation of nitrogen compound metabolic process	0.01854	8	1640	GATA2,SOX17,PLCB1,FOXA2,FST,PTGIS,LEP,ESR1
GO: Biological Process	GO:0008344	adult locomotory behavior	0.01859	2	100	NGF,FOXA2
GO: Biological Process	GO:2000501	regulation of natural killer cell chemotaxis	0.01869	1	9	CCL2
GO: Biological Process	GO:0033684	regulation of luteinizing hormone secretion	0.01869	1	9	LEP
GO: Biological Process	GO:0032905	transforming growth factor beta1 production	0.01869	1	9	THBS1
GO: Biological Process	GO:0032817	regulation of natural killer cell proliferation	0.01869	1	9	LEP
GO: Biological Process	GO:0032908	regulation of transforming growth factor beta1 production	0.01869	1	9	THBS1
GO: Biological Process	GO:2000192	negative regulation of fatty acid transport	0.01869	1	9	THBS1
GO: Biological Process	GO:0002866	positive regulation of acute inflammatory response to antigenic stimulus	0.01869	1	9	C3
GO: Biological Process	GO:0043615	astrocyte cell migration	0.01869	1	9	CCL2
GO: Biological Process	GO:1903867	extraembryonic membrane development	0.01869	1	9	HTRA1
GO: Biological Process	GO:0003339	regulation of mesenchymal to epithelial transition involved in metanephros morphogenesis	0.01869	1	9	PAX8
GO: Biological Process	GO:0072048	renal system pattern specification	0.01869	1	9	PAX8
GO: Biological Process	GO:0001714	endodermal cell fate specification	0.01869	1	9	SOX17
GO: Biological Process	GO:2000543	positive regulation of gastrulation	0.01869	1	9	FOXA2
GO: Biological Process	GO:0060717	chorion development	0.01869	1	9	HTRA1
GO: Biological Process	GO:0001547	antral ovarian follicle growth	0.01869	1	9	ESR1
GO: Biological Process	GO:0034350	regulation of glial cell apoptotic process	0.01869	1	9	CCL2
GO: Biological Process	GO:0060040	retinal bipolar neuron differentiation	0.01869	1	9	PTN
GO: Biological Process	GO:0048793	pronephros development	0.01869	1	9	PAX8
GO: Biological Process	GO:0021796	cerebral cortex regionalization	0.01869	1	9	EMX2
GO: Biological Process	GO:0070092	regulation of glucagon secretion	0.01869	1	9	LEP
GO: Biological Process	GO:0061004	pattern specification involved in kidney development	0.01869	1	9	PAX8
GO: Biological Process	GO:0061549	sympathetic ganglion development	0.01869	1	9	NRP2
GO: Biological Process	GO:2000344	positive regulation of acrosome reaction	0.01869	1	9	PLCB1
GO: Biological Process	GO:0002468	dendritic cell antigen processing and presentation	0.01869	1	9	THBS1
GO: Biological Process	GO:1903798	regulation of production of miRNAs involved in gene silencing by miRNA	0.01869	1	9	ESR1
GO: Biological Process	GO:0090209	negative regulation of triglyceride metabolic process	0.01869	1	9	ESR1
GO: Biological Process	GO:0046880	regulation of follicle-stimulating hormone secretion	0.01869	1	9	LEP
GO: Biological Process	GO:0045654	positive regulation of megakaryocyte differentiation	0.01869	1	9	GATA2
GO: Biological Process	GO:0010873	positive regulation of cholesterol esterification	0.01869	1	9	AGTR1
GO: Biological Process	GO:0038180	nerve growth factor signaling pathway	0.01869	1	9	NGF
GO: Biological Process	GO:0046666	retinal cell programmed cell death	0.01869	1	9	BDNF
GO: Biological Process	GO:1904729	regulation of intestinal lipid absorption	0.01869	1	9	LEP
GO: Biological Process	GO:0090316	positive regulation of intracellular protein transport	0.01875	3	270	CCL2,PEMT,LEP
GO: Biological Process	GO:0060993	kidney morphogenesis	0.01894	2	101	PAX8,AGTR1
GO: Biological Process	GO:0010975	regulation of neuron projection development	0.01908	4	492	NGF,PTN,LPAR3,BDNF
GO: Biological Process	GO:0061326	renal tubule development	0.0193	2	102	PAX8,AGTR1
GO: Biological Process	GO:0042310	vasoconstriction	0.0193	2	102	LEP,AGTR1
GO: Biological Process	GO:0003073	regulation of systemic arterial blood pressure	0.01965	2	103	MME,AGTR1
GO: Biological Process	GO:0001909	leukocyte mediated cytotoxicity	0.01965	2	103	CCL2,LEP
GO: Biological Process	GO:0043255	regulation of carbohydrate biosynthetic process	0.01965	2	103	LEP,PTH1R
GO: Biological Process	GO:0030516	regulation of axon extension	0.02001	2	104	NGF,BDNF
GO: Biological Process	GO:0048872	homeostasis of number of cells	0.02006	3	277	GATA2,PLCB1,TNFSF13B
GO: Biological Process	GO:0018209	peptidyl-serine modification	0.02025	3	278	DCN,NTF3,BDNF
GO: Biological Process	GO:0017015	regulation of transforming growth factor beta receptor signaling pathway	0.02037	2	105	THBS1,HTRA1
GO: Biological Process	GO:1903844	regulation of cellular response to transforming growth factor beta stimulus	0.02037	2	105	THBS1,HTRA1
GO: Biological Process	GO:0035282	segmentation	0.02037	2	105	FOXA2,NRP2
GO: Biological Process	GO:0042063	gliogenesis	0.02044	3	279	PTN,CCL2,NTF3
GO: Biological Process	GO:0018958	phenol-containing compound metabolic process	0.02074	2	106	PAX8,AGTR1
GO: Biological Process	GO:0045727	positive regulation of translation	0.02074	2	106	THBS1,ESR1
GO: Biological Process	GO:0021612	facial nerve structural organization	0.02075	1	10	NRP2
GO: Biological Process	GO:0045837	negative regulation of membrane potential	0.02075	1	10	PTN
GO: Biological Process	GO:0060872	semicircular canal development	0.02075	1	10	GATA2
GO: Biological Process	GO:0051798	positive regulation of hair follicle development	0.02075	1	10	FST
GO: Biological Process	GO:0060149	negative regulation of posttranscriptional gene silencing	0.02075	1	10	ESR1
GO: Biological Process	GO:0045217	cell-cell junction maintenance	0.02075	1	10	CSF1R
GO: Biological Process	GO:0033210	leptin-mediated signaling pathway	0.02075	1	10	LEP
GO: Biological Process	GO:0060967	negative regulation of gene silencing by RNA	0.02075	1	10	ESR1
GO: Biological Process	GO:0072217	negative regulation of metanephros development	0.02075	1	10	PAX8
GO: Biological Process	GO:0021800	cerebral cortex tangential migration	0.02075	1	10	NRP2
GO: Biological Process	GO:0060137	maternal process involved in parturition	0.02075	1	10	CCL2
GO: Biological Process	GO:0035733	hepatic stellate cell activation	0.02075	1	10	LEP
GO: Biological Process	GO:0060215	primitive hemopoiesis	0.02075	1	10	GATA2
GO: Biological Process	GO:0070920	regulation of production of small RNA involved in gene silencing by RNA	0.02075	1	10	ESR1
GO: Biological Process	GO:0070091	glucagon secretion	0.02075	1	10	LEP
GO: Biological Process	GO:0051918	negative regulation of fibrinolysis	0.02075	1	10	THBS1
GO: Biological Process	GO:0070489	T cell aggregation	0.02091	4	506	AIF1,CCL2,LEP,TNFSF13B
GO: Biological Process	GO:0042110	T cell activation	0.02091	4	506	AIF1,CCL2,LEP,TNFSF13B
GO: Biological Process	GO:0030072	peptide hormone secretion	0.02102	3	282	FOXA2,PAX8,LEP
GO: Biological Process	GO:0071593	lymphocyte aggregation	0.02104	4	507	AIF1,CCL2,LEP,TNFSF13B
GO: Biological Process	GO:0050768	negative regulation of neurogenesis	0.0216	3	285	PTN,FOXA2,BDNF
GO: Cellular Component	GO:0005615	extracellular space	4.984e-07	14	1449	MSR1,NGF,PTN,PLA2G2A,CCL2,C3,CXCL16,THBS1,HTRA1,DCN,PTGIS,LEP,TNFSF13B,BDNF
GO: Cellular Component	GO:0043204	perikaryon	1.004e-05	5	142	AIF1,CCL2,ESR1,BDNF,PGR
GO: Cellular Component	GO:0044306	neuron projection terminus	5.089e-05	5	199	CCL2,MME,ESR1,BDNF,PGR
GO: Cellular Component	GO:0030424	axon	0.0001335	7	567	CCL2,LPAR3,MME,ESR1,BDNF,PGR,NRP2
GO: Cellular Component	GO:0043679	axon terminus	0.0005529	4	186	CCL2,ESR1,BDNF,PGR
GO: Cellular Component	GO:0048471	perinuclear region of cytoplasm	0.0005896	7	724	PTN,AIF1,PLA2G2A,CCL2,TNFSF13B,ESR1,BDNF
GO: Cellular Component	GO:0031410	cytoplasmic vesicle	0.001364	9	1355	MSR1,NGF,PLA2G2A,CCL2,THBS1,MME,NTF3,BDNF,AGTR1
GO: Cellular Component	GO:0097708	intracellular vesicle	0.001378	9	1357	MSR1,NGF,PLA2G2A,CCL2,THBS1,MME,NTF3,BDNF,AGTR1
GO: Cellular Component	GO:0036477	somatodendritic compartment	0.00169	7	867	AIF1,CCL2,MME,ESR1,BDNF,PGR,AGTR1
GO: Cellular Component	GO:0044463	cell projection part	0.001855	8	1139	AIF1,CCL2,MME,PEMT,PTH1R,ESR1,BDNF,PGR
GO: Cellular Component	GO:0005903	brush border	0.002316	3	129	MME,PEMT,PTH1R
GO: Cellular Component	GO:0043005	neuron projection	0.002494	8	1194	CCL2,LPAR3,MME,ESR1,BDNF,PGR,AGTR1,NRP2
GO: Cellular Component	GO:0097458	neuron part	0.003364	9	1545	AIF1,CCL2,LPAR3,MME,ESR1,BDNF,PGR,AGTR1,NRP2
GO: Cellular Component	GO:0033267	axon part	0.003564	4	309	CCL2,ESR1,BDNF,PGR
GO: Cellular Component	GO:1990682	CSF1-CSF1R complex	0.004088	1	2	CSF1R
GO: Cellular Component	GO:0098862	cluster of actin-based cell projections	0.005455	3	175	MME,PEMT,PTH1R
GO: Cellular Component	GO:0005589	collagen type VI trimer	0.006126	1	3	DCN
GO: Cellular Component	GO:0098647	collagen beaded filament	0.006126	1	3	DCN
GO: Cellular Component	GO:0005667	transcription factor complex	0.006598	4	368	GATA2,SOX17,HOXA10,PAX8
GO: Cellular Component	GO:0030425	dendrite	0.006741	5	590	CCL2,MME,BDNF,PGR,AGTR1
Mouse Phenotype	MP:0003699	abnormal female reproductive system physiology	6.255e-12	18	717	SOX17,PTN,PLCB1,HOXA10,C3,LPAR3,RXFP1,TAGLN,CSF1R,FOXA2,DCN,FST,PAX8,NTF3,LEP,ESR1,BDNF,PGR
Mouse Phenotype	MP:0001921	reduced fertility	1.122e-10	16	623	SOX17,PLCB1,HOXA10,THBS1,RXFP1,TAGLN,CSF1R,FOXA2,DCN,FST,PAX8,LEP,ESR1,BDNF,PGR,NRP2
Mouse Phenotype	MP:0001923	reduced female fertility	1.395e-10	12	279	SOX17,PLCB1,HOXA10,RXFP1,TAGLN,FOXA2,DCN,FST,LEP,ESR1,BDNF,PGR
Mouse Phenotype	MP:0002161	abnormal fertility/fecundity	5.991e-08	19	1417	SOX17,PTN,PLCB1,HOXA10,LPAR3,THBS1,RXFP1,TAGLN,CSF1R,FOXA2,DCN,FST,PAX8,NTF3,LEP,ESR1,BDNF,PGR,NRP2
Mouse Phenotype	MP:0005389	reproductive system phenotype	7.463e-08	22	1983	GATA2,SOX17,PTN,PLCB1,HOXA10,C3,LPAR3,THBS1,RXFP1,TAGLN,CSF1R,FOXA2,EMX2,DCN,FST,PAX8,NTF3,LEP,ESR1,BDNF,PGR,NRP2
Mouse Phenotype	MP:0001919	abnormal reproductive system physiology	7.483e-08	20	1609	SOX17,PTN,PLCB1,HOXA10,C3,LPAR3,THBS1,RXFP1,TAGLN,CSF1R,FOXA2,DCN,FST,PAX8,NTF3,LEP,ESR1,BDNF,PGR,NRP2
Mouse Phenotype	MP:0002191	abnormal artery morphology	3.523e-07	12	560	MSR1,SOX17,TAGLN,FOXA2,PAX8,NTF3,PTGIS,LEP,PTH1R,ESR1,AGTR1,NRP2
Mouse Phenotype	MP:0009344	abnormal ovulation cycle	9.965e-07	6	94	C3,CSF1R,FOXA2,NTF3,LEP,ESR1
Mouse Phenotype	MP:0001927	abnormal estrous cycle	9.965e-07	6	94	C3,CSF1R,FOXA2,NTF3,LEP,ESR1
Mouse Phenotype	MP:0003279	aneurysm	1.954e-06	5	58	SOX17,HTRA1,TAGLN,NTF3,AGTR1
Mouse Phenotype	MP:0009661	abnormal pregnancy	2.295e-06	7	171	C3,LPAR3,RXFP1,CSF1R,DCN,ESR1,PGR
Mouse Phenotype	MP:0001926	female infertility	2.693e-06	9	342	PTN,HOXA10,FST,PAX8,NTF3,LEP,ESR1,BDNF,PGR
Mouse Phenotype	MP:0001614	abnormal blood vessel morphology	2.893e-06	16	1269	GATA2,MSR1,SOX17,NGF,THBS1,TAGLN,FOXA2,PAX8,NTF3,PTGIS,LEP,PTH1R,ESR1,PGR,AGTR1,NRP2
Mouse Phenotype	MP:0009209	abnormal internal female genitalia morphology	3.15e-06	10	451	GATA2,SOX17,HOXA10,RXFP1,EMX2,FST,PAX8,LEP,ESR1,PGR
Mouse Phenotype	MP:0009208	abnormal female genitalia morphology	3.688e-06	10	459	GATA2,SOX17,HOXA10,RXFP1,EMX2,FST,PAX8,LEP,ESR1,PGR
Mouse Phenotype	MP:0001119	abnormal female reproductive system morphology	3.91e-06	10	462	GATA2,SOX17,HOXA10,RXFP1,EMX2,FST,PAX8,LEP,ESR1,PGR
Mouse Phenotype	MP:0001922	reduced male fertility	4.965e-06	8	274	PLCB1,HOXA10,RXFP1,CSF1R,PAX8,LEP,ESR1,BDNF
Mouse Phenotype	MP:0004727	absent epididymis	7.287e-06	3	11	GATA2,EMX2,PAX8
Mouse Phenotype	MP:0001619	abnormal vascular permeability	8.018e-06	5	77	GATA2,SOX17,NGF,C3,PGR
Mouse Phenotype	MP:0000130	abnormal trabecular bone morphology	8.346e-06	8	294	HTRA1,CSF1R,DCN,PAX8,LEP,PTH1R,ESR1,PGR
Mouse Phenotype	MP:0003572	abnormal uterus development	1.257e-05	3	13	PAX8,ESR1,PGR
Mouse Phenotype	MP:0004728	abnormal efferent ductules of testis morphology	1.257e-05	3	13	EMX2,PAX8,ESR1
Mouse Phenotype	MP:0000907	small mesencephalic trigeminal nucleus	1.309e-05	2	2	NTF3,BDNF
Mouse Phenotype	MP:0013558	abnormal exocrine gland morphology	1.37e-05	12	793	GATA2,HOXA10,THBS1,RXFP1,CSF1R,FOXA2,EMX2,DCN,LEP,ESR1,BDNF,PGR
Mouse Phenotype	MP:0003985	renal fibrosis	1.461e-05	5	87	DCN,PAX8,PTGIS,LEP,AGTR1
Mouse Phenotype	MP:0001126	abnormal ovary morphology	1.55e-05	8	320	GATA2,SOX17,RXFP1,EMX2,FST,LEP,ESR1,PGR
Mouse Phenotype	MP:0009082	uterus cysts	1.595e-05	3	14	HOXA10,ESR1,PGR
Mouse Phenotype	MP:0000462	abnormal digestive system morphology	2.047e-05	14	1131	SOX17,HOXA10,BNC2,C3,IRF6,THBS1,TAGLN,FOXA2,DCN,FST,LEP,PTH1R,ESR1,BDNF
Mouse Phenotype	MP:0003967	abnormal follicle stimulating hormone level	2.13e-05	5	94	GATA2,FST,LEP,ESR1,PGR
Mouse Phenotype	MP:0002164	abnormal gland physiology	2.16e-05	11	690	GATA2,C3,THBS1,RXFP1,CSF1R,FOXA2,FST,PAX8,LEP,ESR1,PGR
Mouse Phenotype	MP:0001935	decreased litter size	2.508e-05	8	342	HOXA10,LPAR3,THBS1,TAGLN,DCN,FST,ESR1,PGR
Mouse Phenotype	MP:0001729	impaired embryo implantation	2.958e-05	3	17	C3,LPAR3,PGR
Mouse Phenotype	MP:0001933	abnormal litter size	3.086e-05	8	352	HOXA10,LPAR3,THBS1,TAGLN,DCN,FST,ESR1,PGR
Mouse Phenotype	MP:0013324	abnormal female reproductive gland morphology	3.346e-05	8	356	GATA2,SOX17,RXFP1,EMX2,FST,LEP,ESR1,PGR
Mouse Phenotype	MP:0003723	abnormal long bone morphology	3.455e-05	10	592	PLCB1,HOXA10,IRF6,CSF1R,DCN,PAX8,LEP,PTH1R,ESR1,PGR
Mouse Phenotype	MP:0002082	postnatal lethality	3.624e-05	15	1360	GATA2,SOX17,NGF,PLCB1,IRF6,CSF1R,PEMT,FOXA2,EMX2,PAX8,NTF3,LEP,BDNF,AGTR1,NRP2
Mouse Phenotype	MP:0005592	abnormal vascular smooth muscle morphology	3.641e-05	5	105	SOX17,THBS1,TAGLN,NTF3,PGR
Mouse Phenotype	MP:0002706	abnormal kidney size	3.846e-05	8	363	GATA2,PLCB1,EMX2,DCN,PAX8,PTGIS,LEP,AGTR1
Mouse Phenotype	MP:0009250	abnormal appendicular skeleton morphology	3.847e-05	11	734	PLCB1,HOXA10,IRF6,CSF1R,DCN,FST,PAX8,LEP,PTH1R,ESR1,PGR
Mouse Phenotype	MP:0004729	absent efferent ductules of testis	3.903e-05	2	3	EMX2,PAX8
Mouse Phenotype	MP:0009662	abnormal uterine receptivity	3.903e-05	2	3	ESR1,PGR
Mouse Phenotype	MP:0013793	abnormal large intestine goblet cell morphology	4.194e-05	3	19	LEP,ESR1,BDNF
Mouse Phenotype	MP:0013795	abnormal colon goblet cell morphology	4.194e-05	3	19	LEP,ESR1,BDNF
Mouse Phenotype	MP:0001914	hemorrhage	4.223e-05	10	606	GATA2,SOX17,THBS1,TAGLN,FST,NTF3,PTH1R,ESR1,PGR,NRP2
Mouse Phenotype	MP:0003361	abnormal circulating gonadotropin level	5.182e-05	5	113	GATA2,FST,LEP,ESR1,PGR
Mouse Phenotype	MP:0000968	abnormal sensory neuron innervation pattern	5.406e-05	5	114	NGF,PAX8,NTF3,BDNF,NRP2
Mouse Phenotype	MP:0005116	abnormal circulating pituitary hormone level	5.576e-05	6	189	GATA2,FST,PAX8,LEP,ESR1,PGR
Mouse Phenotype	MP:0005381	digestive/alimentary phenotype	5.825e-05	15	1415	SOX17,HOXA10,BNC2,C3,IRF6,THBS1,TAGLN,PEMT,FOXA2,DCN,FST,LEP,PTH1R,ESR1,BDNF
Mouse Phenotype	MP:0002828	abnormal renal glomerular capsule morphology	7.187e-05	5	121	DCN,PAX8,PTGIS,LEP,AGTR1
Mouse Phenotype	MP:0011425	abnormal kidney interstitium morphology	7.244e-05	4	62	DCN,PAX8,LEP,AGTR1
Mouse Phenotype	MP:0003363	decreased circulating gonadotropin level	7.244e-05	4	62	GATA2,LEP,ESR1,PGR
Mouse Phenotype	MP:0001544	abnormal cardiovascular system physiology	7.679e-05	16	1634	GATA2,SOX17,NGF,AIF1,C3,THBS1,TAGLN,FST,NTF3,PTGIS,LEP,PTH1R,ESR1,PGR,AGTR1,NRP2
Mouse Phenotype	MP:0009352	impaired spacing of implantation sites	7.789e-05	2	4	LPAR3,PGR
Mouse Phenotype	MP:0001727	abnormal embryo implantation	8.208e-05	4	64	C3,LPAR3,ESR1,PGR
Mouse Phenotype	MP:0001139	abnormal vagina morphology	8.208e-05	4	64	EMX2,PAX8,LEP,ESR1
Mouse Phenotype	MP:0009011	prolonged diestrus	8.651e-05	3	24	CSF1R,LEP,ESR1
Mouse Phenotype	MP:0009129	abnormal white fat cell number	9.806e-05	3	25	LEP,ESR1,AGTR1
Mouse Phenotype	MP:0000556	abnormal hindlimb morphology	0.0001078	8	420	HOXA10,IRF6,THBS1,PAX8,LEP,PTH1R,ESR1,PGR
Mouse Phenotype	MP:0003574	abnormal oviduct morphology	0.0001106	3	26	EMX2,PAX8,PGR
Mouse Phenotype	MP:0003973	increased pituitary hormone level	0.0001208	5	135	FST,PAX8,LEP,ESR1,PGR
Mouse Phenotype	MP:0008256	abnormal myometrium morphology	0.0001241	3	27	PAX8,ESR1,PGR
Mouse Phenotype	MP:0000830	abnormal diencephalon morphology	0.0001252	7	317	GATA2,EMX2,PAX8,LEP,ESR1,AGTR1,NRP2
Mouse Phenotype	MP:0005149	abnormal gubernaculum morphology	0.0001295	2	5	HOXA10,RXFP1
Mouse Phenotype	MP:0005492	exocrine pancreas hypoplasia	0.0001295	2	5	THBS1,FOXA2
Mouse Phenotype	MP:0003965	abnormal pituitary hormone level	0.0001393	6	223	GATA2,FST,PAX8,LEP,ESR1,PGR
Mouse Phenotype	MP:0001731	abnormal postnatal growth	0.0001453	12	1006	GATA2,NGF,PLCB1,CSF1R,FOXA2,PAX8,NTF3,LEP,PTH1R,ESR1,BDNF,NRP2
Mouse Phenotype	MP:0000633	abnormal pituitary gland morphology	0.0001533	5	142	GATA2,EMX2,PAX8,LEP,ESR1
Mouse Phenotype	MP:0002769	abnormal vas deferens morphology	0.0001542	3	29	HOXA10,EMX2,PAX8
Mouse Phenotype	MP:0003969	abnormal luteinizing hormone level	0.0001607	4	76	FST,LEP,ESR1,PGR
Mouse Phenotype	MP:0002114	abnormal axial skeleton morphology	0.0001645	14	1362	PLCB1,HOXA10,BNC2,IRF6,THBS1,TAGLN,CSF1R,FOXA2,EMX2,DCN,FST,PAX8,PTH1R,ESR1
Mouse Phenotype	MP:0002773	decreased circulating luteinizing hormone level	0.0001709	3	30	LEP,ESR1,PGR
Mouse Phenotype	MP:0004686	decreased length of long bones	0.0001732	7	334	HOXA10,IRF6,CSF1R,DCN,LEP,PTH1R,ESR1
Mouse Phenotype	MP:0002631	abnormal epididymis morphology	0.0001803	5	147	GATA2,RXFP1,EMX2,PAX8,ESR1
Mouse Phenotype	MP:0009010	abnormal diestrus	0.0001888	3	31	CSF1R,LEP,ESR1
Mouse Phenotype	MP:0008995	early reproductive senescence	0.0001888	3	31	FST,ESR1,PGR
Mouse Phenotype	MP:0009118	increased white fat cell size	0.0001888	3	31	LEP,ESR1,AGTR1
Mouse Phenotype	MP:0030188	round snout	0.0001938	2	6	IRF6,CSF1R
Mouse Phenotype	MP:0000964	small dorsal root ganglion	0.0002078	3	32	NGF,NTF3,BDNF
Mouse Phenotype	MP:0001422	abnormal drinking behavior	0.0002109	5	152	FOXA2,PAX8,LEP,BDNF,AGTR1
Mouse Phenotype	MP:0003953	abnormal hormone level	0.0002111	12	1046	GATA2,C3,THBS1,FOXA2,FST,PAX8,NTF3,LEP,PTH1R,ESR1,BDNF,PGR
Mouse Phenotype	MP:0005076	abnormal cell differentiation	0.0002158	10	736	GATA2,IRF6,CSF1R,FOXA2,EMX2,FST,LEP,ESR1,BDNF,NRP2
Mouse Phenotype	MP:0000628	abnormal mammary gland development	0.0002174	5	153	RXFP1,CSF1R,LEP,ESR1,PGR
Mouse Phenotype	MP:0000767	abnormal smooth muscle morphology	0.0002174	5	153	SOX17,THBS1,TAGLN,NTF3,PGR
Mouse Phenotype	MP:0002184	abnormal innervation	0.0002276	6	244	NGF,PAX8,NTF3,ESR1,BDNF,NRP2
Mouse Phenotype	MP:0009006	prolonged estrous cycle	0.000228	3	33	C3,CSF1R,LEP
Mouse Phenotype	MP:0002827	abnormal renal corpuscle morphology	0.0002436	7	353	C3,DCN,PAX8,PTGIS,LEP,ESR1,AGTR1
Mouse Phenotype	MP:0002116	abnormal craniofacial bone morphology	0.0002491	10	749	PLCB1,BNC2,IRF6,CSF1R,FOXA2,EMX2,DCN,FST,PAX8,PTH1R
Mouse Phenotype	MP:0003970	abnormal prolactin level	0.0002494	3	34	LEP,ESR1,PGR
Mouse Phenotype	MP:0002989	small kidney	0.0002595	6	250	GATA2,EMX2,DCN,PAX8,PTGIS,AGTR1
Mouse Phenotype	MP:0002128	abnormal blood circulation	0.0002602	10	753	GATA2,SOX17,THBS1,TAGLN,FST,NTF3,PTH1R,ESR1,PGR,NRP2
Mouse Phenotype	MP:0002135	abnormal kidney morphology	0.0002692	11	910	GATA2,PLCB1,C3,THBS1,EMX2,DCN,PAX8,PTGIS,LEP,ESR1,AGTR1
Mouse Phenotype	MP:0001021	small L4 dorsal root ganglion	0.0002707	2	7	NTF3,BDNF
Mouse Phenotype	MP:0013554	abnormal apocrine gland morphology	0.000295	6	256	THBS1,RXFP1,CSF1R,LEP,ESR1,PGR
Mouse Phenotype	MP:0000627	abnormal mammary gland morphology	0.000295	6	256	THBS1,RXFP1,CSF1R,LEP,ESR1,PGR
Mouse Phenotype	MP:0001290	delayed eyelid opening	0.0003214	3	37	NGF,PAX8,BDNF
Mouse Phenotype	MP:0000653	abnormal sex gland morphology	0.0003259	11	930	GATA2,SOX17,PLCB1,HOXA10,RXFP1,EMX2,FST,PAX8,LEP,ESR1,PGR
Mouse Phenotype	MP:0000783	abnormal forebrain morphology	0.0003283	12	1096	GATA2,PLCB1,C3,CSF1R,FOXA2,EMX2,PAX8,LEP,ESR1,BDNF,AGTR1,NRP2
Mouse Phenotype	MP:0005418	abnormal circulating hormone level	0.0003383	11	934	GATA2,C3,THBS1,FOXA2,FST,PAX8,LEP,PTH1R,ESR1,BDNF,PGR
Mouse Phenotype	MP:0000631	abnormal neuroendocrine gland morphology	0.0003545	5	170	GATA2,EMX2,PAX8,LEP,ESR1
Mouse Phenotype	MP:0001019	abnormal L4 dorsal root ganglion morphology	0.0003601	2	8	NTF3,BDNF
Mouse Phenotype	MP:0009251	enlarged endometrial glands	0.0003601	2	8	ESR1,PGR
Mouse Phenotype	MP:0001001	abnormal chemoreceptor morphology	0.0003762	3	39	EMX2,FST,NRP2
Mouse Phenotype	MP:0003936	abnormal reproductive system development	0.0003795	4	95	HOXA10,PAX8,ESR1,PGR
Mouse Phenotype	MP:0002113	abnormal skeleton development	0.0003875	8	506	HOXA10,BNC2,CSF1R,FST,PAX8,LEP,PTH1R,ESR1
Mouse Phenotype	MP:0000521	abnormal kidney cortex morphology	0.0003942	7	382	C3,DCN,PAX8,PTGIS,LEP,ESR1,AGTR1
Mouse Phenotype	MP:0002790	decreased circulating follicle stimulating hormone level	0.0004057	3	40	GATA2,LEP,ESR1
Mouse Phenotype	MP:0003743	abnormal facial morphology	0.0004081	10	796	BNC2,IRF6,CSF1R,FOXA2,EMX2,DCN,FST,PTH1R,BDNF,NRP2
Mouse Phenotype	MP:0003797	abnormal compact bone morphology	0.0004494	5	179	CSF1R,DCN,PAX8,ESR1,PGR
Mouse Phenotype	MP:0000432	abnormal head morphology	0.0004495	11	965	BNC2,IRF6,CSF1R,FOXA2,EMX2,DCN,FST,PAX8,PTH1R,BDNF,NRP2
Mouse Phenotype	MP:0013330	abnormal male accessory sex gland morphology	0.000461	5	180	GATA2,HOXA10,EMX2,LEP,ESR1
Mouse Phenotype	MP:0009362	abnormal primary ovarian follicle morphology	0.000462	2	9	FST,ESR1
Mouse Phenotype	MP:0000906	abnormal trigeminal V mesencephalic nucleus morphology	0.000462	2	9	NTF3,BDNF
Mouse Phenotype	MP:0009493	abnormal cystic duct morphology	0.000462	2	9	SOX17,THBS1
Mouse Phenotype	MP:0005132	decreased luteinizing hormone level	0.000469	3	42	LEP,ESR1,PGR
Mouse Phenotype	MP:0011941	increased fluid intake	0.0004792	4	101	FOXA2,PAX8,LEP,AGTR1
Mouse Phenotype	MP:0004163	abnormal adenohypophysis morphology	0.0004974	4	102	EMX2,PAX8,LEP,ESR1
Mouse Phenotype	MP:0005118	decreased circulating pituitary hormone level	0.0005162	4	103	GATA2,LEP,ESR1,PGR
Mouse Phenotype	MP:0005491	pancreatic islet hyperplasia	0.0005384	3	44	THBS1,LEP,PGR
Mouse Phenotype	MP:0005338	atherosclerotic lesions	0.0005552	4	105	MSR1,TAGLN,LEP,ESR1
Mouse Phenotype	MP:0000516	abnormal renal/urinary system morphology	0.0005604	11	990	GATA2,PLCB1,C3,THBS1,EMX2,DCN,PAX8,PTGIS,LEP,ESR1,AGTR1
Mouse Phenotype	MP:0020202	abnormal macrophage cell number	0.0005636	6	289	PTN,C3,CSF1R,FOXA2,LEP,ESR1
Mouse Phenotype	MP:0013560	abnormal endocrine gland morphology	0.0005751	11	993	GATA2,SOX17,THBS1,FOXA2,EMX2,DCN,PAX8,LEP,PTH1R,ESR1,PGR
Mouse Phenotype	MP:0005504	abnormal ligament morphology	0.0005754	3	45	HOXA10,RXFP1,DCN
Mouse Phenotype	MP:0004016	decreased bone mass	0.0005755	4	106	CSF1R,DCN,LEP,ESR1
Mouse Phenotype	MP:0008947	increased neuron number	0.0005755	4	106	C3,EMX2,FST,BDNF
Mouse Phenotype	MP:0001088	small nodose ganglion	0.0005761	2	10	NTF3,BDNF
Mouse Phenotype	MP:0009130	increased white fat cell number	0.0005761	2	10	LEP,ESR1
Mouse Phenotype	MP:0009736	abnormal prostate gland branching morphogenesis	0.0005761	2	10	HOXA10,ESR1
Mouse Phenotype	MP:0010962	decreased compact bone mass	0.0005761	2	10	DCN,ESR1
Mouse Phenotype	MP:0009097	absent endometrial glands	0.0005761	2	10	ESR1,PGR
Mouse Phenotype	MP:0004982	abnormal osteoclast morphology	0.0005762	5	189	C3,CSF1R,LEP,ESR1,PGR
Mouse Phenotype	MP:0001967	deafness	0.0006176	4	108	CSF1R,EMX2,PAX8,BDNF
Mouse Phenotype	MP:0000428	abnormal craniofacial morphology	0.0006313	12	1176	PLCB1,BNC2,IRF6,CSF1R,FOXA2,EMX2,DCN,FST,PAX8,PTH1R,BDNF,NRP2
Mouse Phenotype	MP:0005382	craniofacial phenotype	0.0006512	12	1180	PLCB1,BNC2,IRF6,CSF1R,FOXA2,EMX2,DCN,FST,PAX8,PTH1R,BDNF,NRP2
Mouse Phenotype	MP:0004166	abnormal limbic system morphology	0.000658	7	416	PLCB1,C3,EMX2,ESR1,BDNF,AGTR1,NRP2
Mouse Phenotype	MP:0003991	arteriosclerosis	0.0006619	4	110	MSR1,TAGLN,LEP,ESR1
Mouse Phenotype	MP:0000249	abnormal blood vessel physiology	0.0006771	7	418	GATA2,SOX17,NGF,C3,LEP,ESR1,PGR
Mouse Phenotype	MP:0009170	abnormal pancreatic islet size	0.0006848	4	111	THBS1,FOXA2,LEP,PGR
Mouse Phenotype	MP:0009347	increased trabecular bone thickness	0.0006961	3	48	HTRA1,LEP,PGR
Mouse Phenotype	MP:0002152	abnormal brain morphology	0.0007006	15	1758	GATA2,PLCB1,C3,CSF1R,PEMT,FOXA2,EMX2,PAX8,NTF3,LEP,PTH1R,ESR1,BDNF,AGTR1,NRP2
Mouse Phenotype	MP:0001085	small petrosal ganglion	0.0007025	2	11	NTF3,BDNF
Mouse Phenotype	MP:0003877	abnormal serotonergic neuron morphology	0.0007025	2	11	GATA2,BDNF
Mouse Phenotype	MP:0002679	abnormal corpus luteum morphology	0.0007084	4	112	FST,LEP,ESR1,PGR
Mouse Phenotype	MP:0001120	abnormal uterus morphology	0.0007969	5	203	HOXA10,EMX2,PAX8,ESR1,PGR
Mouse Phenotype	MP:0001924	infertility	0.0008049	10	867	PTN,HOXA10,DCN,FST,PAX8,NTF3,LEP,ESR1,BDNF,PGR
Mouse Phenotype	MP:0005130	decreased follicle stimulating hormone level	0.0008318	3	51	GATA2,LEP,ESR1
Mouse Phenotype	MP:0000534	abnormal ureter morphology	0.0008329	5	205	GATA2,EMX2,DCN,PAX8,AGTR1
Mouse Phenotype	MP:0005117	increased circulating pituitary hormone level	0.0008347	4	117	FST,PAX8,ESR1,PGR
Mouse Phenotype	MP:0002963	decreased urine protein level	0.0008411	2	12	C3,PAX8
Mouse Phenotype	MP:0001123	dilated uterus	0.0008411	2	12	ESR1,PGR
Mouse Phenotype	MP:0003557	absent vas deferens	0.0008411	2	12	EMX2,PAX8
Mouse Phenotype	MP:0002882	abnormal neuron morphology	0.0008432	14	1589	GATA2,MSR1,NGF,PLCB1,C3,CSF1R,FOXA2,EMX2,FST,PAX8,NTF3,LEP,BDNF,NRP2
Mouse Phenotype	MP:0003070	increased vascular permeability	0.0008805	3	52	GATA2,SOX17,NGF
Mouse Phenotype	MP:0003795	abnormal bone structure	0.0009125	10	881	C3,THBS1,HTRA1,CSF1R,DCN,PAX8,LEP,PTH1R,ESR1,PGR
Mouse Phenotype	MP:0020137	decreased bone mineralization	0.000931	3	53	CSF1R,PAX8,ESR1
Mouse Phenotype	MP:0000519	hydronephrosis	0.0009761	4	122	GATA2,DCN,PAX8,AGTR1
Mouse Phenotype	MP:0005489	vascular smooth muscle hyperplasia	0.0009918	2	13	THBS1,PGR
Mouse Phenotype	MP:0001087	abnormal nodose ganglion morphology	0.0009918	2	13	NTF3,BDNF
Mouse Phenotype	MP:0009735	abnormal prostate gland development	0.0009918	2	13	HOXA10,ESR1
Mouse Phenotype	MP:0001083	small geniculate ganglion	0.0009918	2	13	NTF3,BDNF
Mouse Phenotype	MP:0000438	abnormal cranium morphology	0.001006	9	733	PLCB1,BNC2,IRF6,CSF1R,FOXA2,DCN,FST,PAX8,PTH1R
Mouse Phenotype	MP:0000550	abnormal forelimb morphology	0.001032	5	215	HOXA10,IRF6,LEP,ESR1,PGR
Mouse Phenotype	MP:0000762	abnormal tongue morphology	0.001037	4	124	BNC2,IRF6,PTH1R,BDNF
Mouse Phenotype	MP:0003972	decreased pituitary hormone level	0.001037	4	124	GATA2,LEP,ESR1,PGR
Mouse Phenotype	MP:0003215	renal interstitial fibrosis	0.001037	3	55	DCN,PAX8,LEP
Mouse Phenotype	MP:0002016	ovary cysts	0.001037	3	55	FST,ESR1,PGR
Mouse Phenotype	MP:0005367	renal/urinary system phenotype	0.001059	12	1245	GATA2,PLCB1,C3,THBS1,TAGLN,EMX2,DCN,PAX8,PTGIS,LEP,ESR1,AGTR1
Mouse Phenotype	MP:0000134	abnormal compact bone thickness	0.001069	4	125	CSF1R,PAX8,ESR1,PGR
Mouse Phenotype	MP:0006395	abnormal epiphyseal plate morphology	0.001098	5	218	CSF1R,PAX8,LEP,PTH1R,ESR1
Mouse Phenotype	MP:0000452	abnormal mouth morphology	0.001133	8	595	BNC2,IRF6,CSF1R,FOXA2,DCN,FST,PTH1R,BDNF
Mouse Phenotype	MP:0005388	respiratory system phenotype	0.00114	13	1442	THBS1,RXFP1,FOXA2,EMX2,DCN,FST,NTF3,LEP,PTH1R,ESR1,BDNF,PGR,NRP2
Mouse Phenotype	MP:0004896	abnormal endometrium morphology	0.001151	3	57	PAX8,ESR1,PGR
Mouse Phenotype	MP:0004842	abnormal large intestine crypts of Lieberkuhn morphology	0.001151	3	57	LEP,ESR1,BDNF
Mouse Phenotype	MP:0003670	dilated renal glomerular capsule	0.001154	2	14	PAX8,PTGIS
Mouse Phenotype	MP:0002292	abnormal gestational length	0.001154	2	14	LPAR3,DCN
Mouse Phenotype	MP:0008332	decreased lactotroph cell number	0.001154	2	14	PAX8,ESR1
Mouse Phenotype	MP:0001846	increased inflammatory response	0.001162	11	1079	SOX17,AIF1,C3,THBS1,MME,TAGLN,DCN,LEP,ESR1,PGR,AGTR1
Mouse Phenotype	MP:0011947	abnormal fluid intake	0.001167	4	128	FOXA2,PAX8,LEP,AGTR1
Mouse Phenotype	MP:0011655	abnormal systemic artery morphology	0.001201	6	334	SOX17,TAGLN,PAX8,PTGIS,PTH1R,AGTR1
Mouse Phenotype	MP:0011504	abnormal limb long bone morphology	0.001206	7	461	HOXA10,IRF6,PAX8,LEP,PTH1R,ESR1,PGR
Mouse Phenotype	MP:0001257	increased body length	0.001211	3	58	LEP,ESR1,BDNF
Mouse Phenotype	MP:0000662	abnormal branching of the mammary ductal tree	0.001273	3	59	LEP,ESR1,PGR
Mouse Phenotype	MP:0004834	ovary hemorrhage	0.001329	2	15	FST,ESR1
Mouse Phenotype	MP:0009111	pancreas hypoplasia	0.001329	2	15	THBS1,FOXA2
Mouse Phenotype	MP:0010909	pulmonary alveolar hemorrhage	0.001329	2	15	THBS1,NTF3
Mouse Phenotype	MP:0010960	abnormal compact bone mass	0.001329	2	15	DCN,ESR1
Mouse Phenotype	MP:0009498	abnormal extrahepatic bile duct morphology	0.001329	2	15	SOX17,THBS1
Mouse Phenotype	MP:0004904	increased uterus weight	0.001329	2	15	ESR1,PGR
Mouse Phenotype	MP:0002780	decreased circulating testosterone level	0.001336	3	60	FST,LEP,ESR1
Mouse Phenotype	MP:0002059	abnormal seminal vesicle morphology	0.001346	4	133	GATA2,HOXA10,EMX2,LEP
Mouse Phenotype	MP:0000547	short limbs	0.001383	4	134	IRF6,CSF1R,PAX8,PTH1R
Mouse Phenotype	MP:0002083	premature death	0.00144	13	1478	GATA2,NGF,THBS1,TAGLN,CSF1R,PEMT,FOXA2,DCN,PAX8,LEP,ESR1,BDNF,PGR
Mouse Phenotype	MP:0001634	internal hemorrhage	0.001462	6	347	THBS1,TAGLN,FST,NTF3,ESR1,PGR
Mouse Phenotype	MP:0009171	enlarged pancreatic islets	0.00147	3	62	THBS1,LEP,PGR
Mouse Phenotype	MP:0002446	abnormal macrophage morphology	0.001489	7	478	PTN,C3,CSF1R,FOXA2,LEP,ESR1,PGR
Mouse Phenotype	MP:0000598	abnormal liver morphology	0.001491	11	1112	GATA2,SOX17,PTN,C3,THBS1,MME,PEMT,FOXA2,LEP,PTH1R,ESR1
Mouse Phenotype	MP:0009131	decreased white fat cell number	0.001515	2	16	LEP,AGTR1
Mouse Phenotype	MP:0001084	abnormal petrosal ganglion morphology	0.001515	2	16	NTF3,BDNF
Mouse Phenotype	MP:0008323	abnormal lactotroph morphology	0.001515	2	16	PAX8,ESR1
Mouse Phenotype	MP:0002865	increased growth rate	0.001515	2	16	LEP,ESR1
Mouse Phenotype	MP:0002115	abnormal limb bone morphology	0.0016	7	484	HOXA10,IRF6,PAX8,LEP,PTH1R,ESR1,PGR
Mouse Phenotype	MP:0001134	absent corpus luteum	0.001611	3	64	LEP,ESR1,PGR
Mouse Phenotype	MP:0004970	kidney atrophy	0.001611	3	64	DCN,PTGIS,AGTR1
Mouse Phenotype	MP:0000956	decreased spinal cord size	0.001713	2	17	FOXA2,NTF3
Mouse Phenotype	MP:0000454	abnormal jaw morphology	0.001759	7	492	BNC2,IRF6,CSF1R,FOXA2,DCN,FST,PTH1R
Mouse Phenotype	MP:0002707	abnormal kidney weight	0.001803	4	144	PLCB1,PAX8,LEP,AGTR1
Mouse Phenotype	MP:0005394	taste/olfaction phenotype	0.001803	4	144	CSF1R,EMX2,FST,BDNF
Mouse Phenotype	MP:0002160	abnormal reproductive system morphology	0.001804	12	1322	GATA2,SOX17,PLCB1,HOXA10,RXFP1,CSF1R,EMX2,FST,PAX8,LEP,ESR1,PGR
Mouse Phenotype	MP:0011086	postnatal lethality, incomplete penetrance	0.001835	9	798	GATA2,NGF,IRF6,PEMT,NTF3,LEP,BDNF,AGTR1,NRP2
Mouse Phenotype	MP:0008262	abnormal hippocampus region morphology	0.001838	3	67	C3,EMX2,BDNF
Mouse Phenotype	MP:0003362	increased circulating gonadotropin level	0.001838	3	67	FST,ESR1,PGR
Mouse Phenotype	MP:0002637	small uterus	0.001838	3	67	PAX8,ESR1,PGR
Mouse Phenotype	MP:0002108	abnormal muscle morphology	0.001869	11	1143	SOX17,NGF,C3,THBS1,TAGLN,DCN,FST,NTF3,LEP,ESR1,PGR
Mouse Phenotype	MP:0004194	abnormal kidney pelvis morphology	0.001897	4	146	GATA2,DCN,PAX8,AGTR1
Mouse Phenotype	MP:0002081	perinatal lethality	0.001914	12	1331	GATA2,SOX17,BNC2,IRF6,FOXA2,EMX2,DCN,FST,NTF3,PTH1R,BDNF,NRP2
Mouse Phenotype	MP:0003446	renal hypoplasia	0.001918	3	68	GATA2,EMX2,PAX8
Mouse Phenotype	MP:0004883	abnormal vascular wound healing	0.001918	3	68	LEP,ESR1,PGR
Mouse Phenotype	MP:0009364	abnormal mature ovarian follicle morphology	0.001918	3	68	FST,ESR1,PGR
Mouse Phenotype	MP:0004874	abnormal timing of postnatal eyelid opening	0.001918	3	68	NGF,PAX8,BDNF
Mouse Phenotype	MP:0011167	abnormal adipose tissue development	0.001923	2	18	LEP,AGTR1
Mouse Phenotype	MP:0003240	loss of hippocampal neurons	0.001923	2	18	PLCB1,C3
Mouse Phenotype	MP:0009815	decreased prostaglandin level	0.001923	2	18	LPAR3,PTGIS
Mouse Phenotype	MP:0005121	decreased circulating prolactin level	0.001923	2	18	LEP,ESR1
Mouse Phenotype	MP:0003881	abnormal nephron morphology	0.001929	7	500	C3,DCN,PAX8,PTGIS,LEP,ESR1,AGTR1
Mouse Phenotype	MP:0009937	abnormal neuron differentiation	0.001946	6	367	GATA2,FOXA2,EMX2,FST,BDNF,NRP2
Mouse Phenotype	MP:0002557	abnormal social/conspecific interaction	0.001973	6	368	CSF1R,FOXA2,LEP,ESR1,BDNF,PGR
Mouse Phenotype	MP:0003942	abnormal urinary system development	0.001994	4	148	GATA2,EMX2,PAX8,AGTR1
Mouse Phenotype	MP:0000965	abnormal sensory neuron morphology	0.001996	7	503	NGF,EMX2,FST,PAX8,NTF3,BDNF,NRP2
Mouse Phenotype	MP:0000604	amyloidosis	0.002001	3	69	MSR1,C3,MME
Mouse Phenotype	MP:0002100	abnormal tooth morphology	0.00205	5	251	IRF6,CSF1R,FOXA2,DCN,FST
Mouse Phenotype	MP:0001732	postnatal growth retardation	0.002067	10	980	GATA2,NGF,PLCB1,CSF1R,FOXA2,PAX8,NTF3,PTH1R,BDNF,NRP2
Mouse Phenotype	MP:0009106	abnormal pancreas size	0.002085	3	70	THBS1,FOXA2,LEP
Mouse Phenotype	MP:0004859	abnormal synaptic plasticity	0.002085	3	70	C3,BDNF,NRP2
Mouse Phenotype	MP:0030254	abnormal dental arch morphology	0.002086	5	252	IRF6,CSF1R,FOXA2,DCN,FST
Mouse Phenotype	MP:0009085	abnormal uterine horn morphology	0.002144	2	19	PAX8,PGR
Mouse Phenotype	MP:0001385	pup cannibalization	0.002144	2	19	FOXA2,ESR1
Mouse Phenotype	MP:0006404	abnormal lumbar dorsal root ganglion morphology	0.002144	2	19	NTF3,BDNF
Mouse Phenotype	MP:0005618	decreased urine potassium level	0.002144	2	19	PAX8,AGTR1
Mouse Phenotype	MP:0009092	endometrium hyperplasia	0.002144	2	19	ESR1,PGR
Mouse Phenotype	MP:0001121	uterus hypoplasia	0.002144	2	19	PAX8,ESR1
Mouse Phenotype	MP:0005579	absent outer ear	0.002144	2	19	IRF6,PAX8
Mouse Phenotype	MP:0008329	decreased somatotroph cell number	0.002144	2	19	PAX8,LEP
Mouse Phenotype	MP:0011085	postnatal lethality, complete penetrance	0.002161	8	658	SOX17,IRF6,CSF1R,FOXA2,EMX2,PAX8,NTF3,BDNF
Mouse Phenotype	MP:0001433	polyphagia	0.002171	3	71	C3,LEP,BDNF
Mouse Phenotype	MP:0000815	abnormal Ammon gyrus morphology	0.002171	3	71	C3,EMX2,BDNF
Mouse Phenotype	MP:0000230	abnormal systemic arterial blood pressure	0.002234	5	256	THBS1,TAGLN,PTGIS,LEP,AGTR1
Mouse Phenotype	MP:0002069	abnormal consumption behavior	0.002246	8	662	C3,TAGLN,FOXA2,PAX8,NTF3,LEP,BDNF,AGTR1
Mouse Phenotype	MP:0003786	premature aging	0.00226	3	72	FST,ESR1,PGR
Mouse Phenotype	MP:0002109	abnormal limb morphology	0.002312	9	825	HOXA10,IRF6,THBS1,CSF1R,PAX8,LEP,PTH1R,ESR1,PGR
Mouse Phenotype	MP:0001524	impaired limb coordination	0.002351	3	73	PEMT,NTF3,BDNF
Mouse Phenotype	MP:0001198	tight skin	0.002377	2	20	IRF6,FST
Mouse Phenotype	MP:0009292	increased inguinal fat pad weight	0.002377	2	20	LEP,ESR1
Mouse Phenotype	MP:0008248	abnormal mononuclear phagocyte morphology	0.002422	8	670	PTN,C3,THBS1,CSF1R,FOXA2,LEP,ESR1,PGR
Mouse Phenotype	MP:0001191	abnormal skin condition	0.002431	5	261	THBS1,MME,FOXA2,DCN,NRP2
Mouse Phenotype	MP:0003449	abnormal intestinal goblet cell morphology	0.002444	3	74	LEP,ESR1,BDNF
Mouse Phenotype	MP:0006094	increased fat cell size	0.002444	3	74	LEP,ESR1,AGTR1
Mouse Phenotype	MP:0001533	abnormal skeleton physiology	0.002445	8	671	AIF1,C3,IRF6,CSF1R,PAX8,PTH1R,ESR1,PGR
Mouse Phenotype	MP:0005416	abnormal circulating protein level	0.002461	10	1003	SOX17,PTN,C3,CXCL16,MME,CSF1R,PEMT,LEP,ESR1,AGTR1
Mouse Phenotype	MP:0002842	increased systemic arterial blood pressure	0.002473	4	157	THBS1,PTGIS,LEP,AGTR1
Mouse Phenotype	MP:0005180	abnormal circulating testosterone level	0.00254	3	75	FST,LEP,ESR1
Mouse Phenotype	MP:0020578	abnormal pancreatic beta cell number	0.00254	3	75	FOXA2,LEP,PGR
Mouse Phenotype	MP:0003703	abnormal vestibulocochlear ganglion morphology	0.002621	2	21	NTF3,BDNF
Mouse Phenotype	MP:0011501	increased glomerular capsule space	0.002621	2	21	DCN,AGTR1
Mouse Phenotype	MP:0009819	abnormal circulating androgen level	0.002638	3	76	FST,LEP,ESR1
Mouse Phenotype	MP:0009503	abnormal mammary gland duct morphology	0.002638	3	76	LEP,ESR1,PGR
Mouse Phenotype	MP:0003725	increased autoantibody level	0.002709	4	161	C3,THBS1,TNFSF13B,ESR1
Mouse Phenotype	MP:0011939	increased food intake	0.00277	4	162	C3,FOXA2,LEP,BDNF
Mouse Phenotype	MP:0001756	abnormal urination	0.002832	4	163	TAGLN,PAX8,LEP,AGTR1
Mouse Phenotype	MP:0011367	abnormal kidney apoptosis	0.00284	3	78	THBS1,DCN,PAX8
Mouse Phenotype	MP:0011385	abnormal testosterone level	0.00284	3	78	FST,LEP,ESR1
Mouse Phenotype	MP:0001007	abnormal sympathetic system morphology	0.00284	3	78	NGF,NTF3,BDNF
Mouse Phenotype	MP:0003503	decreased activity of thyroid	0.002877	2	22	PAX8,LEP
Mouse Phenotype	MP:0003662	abnormal long bone epiphyseal plate proliferative zone	0.002945	3	79	CSF1R,LEP,PTH1R
Mouse Phenotype	MP:0013561	abnormal endocrine gland physiology	0.002964	6	399	GATA2,FOXA2,PAX8,LEP,ESR1,PGR
Mouse Phenotype	MP:0002138	abnormal hepatobiliary system morphology	0.00298	11	1211	GATA2,SOX17,PTN,C3,THBS1,MME,PEMT,FOXA2,LEP,PTH1R,ESR1
Mouse Phenotype	MP:0005391	vision/eye phenotype	0.003008	13	1600	NGF,AIF1,C3,THBS1,HTRA1,FOXA2,EMX2,FST,PAX8,NTF3,LEP,PTH1R,BDNF
Mouse Phenotype	MP:0002928	abnormal bile duct morphology	0.003052	3	80	SOX17,THBS1,PTH1R
Mouse Phenotype	MP:0008487	abnormal mesonephros morphology	0.003052	3	80	EMX2,PAX8,ESR1
Mouse Phenotype	MP:0009936	abnormal dendritic spine morphology	0.003052	3	80	C3,BDNF,NRP2
Mouse Phenotype	MP:0001093	small trigeminal ganglion	0.003144	2	23	NTF3,BDNF
Mouse Phenotype	MP:0003645	increased pancreatic beta cell number	0.003144	2	23	LEP,PGR
Mouse Phenotype	MP:0002871	albuminuria	0.003161	3	81	PAX8,LEP,ESR1
Mouse Phenotype	MP:0002566	abnormal sexual interaction	0.003161	3	81	CSF1R,ESR1,PGR
Mouse Phenotype	MP:0005274	abnormal viscerocranium morphology	0.003275	7	549	BNC2,IRF6,CSF1R,FOXA2,DCN,FST,PTH1R
Mouse Phenotype	MP:0001860	liver inflammation	0.003296	4	170	SOX17,C3,LEP,ESR1
Mouse Phenotype	MP:0010678	abnormal skin adnexa morphology	0.003312	10	1044	NGF,IRF6,THBS1,RXFP1,CSF1R,DCN,FST,LEP,ESR1,PGR
Mouse Phenotype	MP:0001928	abnormal ovulation	0.003388	3	83	FST,ESR1,PGR
Mouse Phenotype	MP:0005528	decreased renal glomerular filtration rate	0.003422	2	24	PAX8,AGTR1
Mouse Phenotype	MP:0011471	decreased urine creatinine level	0.003422	2	24	PAX8,AGTR1
Mouse Phenotype	MP:0001082	abnormal geniculate ganglion morphology	0.003422	2	24	NTF3,BDNF
Mouse Phenotype	MP:0009095	abnormal endometrial gland number	0.003422	2	24	ESR1,PGR
Mouse Phenotype	MP:0005647	abnormal sex gland physiology	0.003504	3	84	CSF1R,FST,ESR1
Mouse Phenotype	MP:0010792	abnormal stomach mucosa morphology	0.003504	3	84	THBS1,DCN,ESR1
Mouse Phenotype	MP:0002068	abnormal parental behavior	0.00351	4	173	FOXA2,LEP,ESR1,BDNF
Mouse Phenotype	MP:0005502	abnormal renal/urinary system physiology	0.003631	8	715	C3,THBS1,TAGLN,DCN,PAX8,LEP,ESR1,AGTR1
Mouse Phenotype	MP:0004850	abnormal testis weight	0.003663	5	287	PLCB1,RXFP1,PAX8,LEP,ESR1
Mouse Phenotype	MP:0004660	absent thyroid follicular cells	0.003677	1	1	PAX8
Mouse Phenotype	MP:0009224	absent endometrium	0.003677	1	1	PAX8
Mouse Phenotype	MP:0009206	absent internal male genitalia	0.003677	1	1	EMX2
Mouse Phenotype	MP:0003669	periodontal ligament hypercellularity	0.003677	1	1	DCN
Mouse Phenotype	MP:0009649	delayed embryo implantation	0.003677	1	1	LPAR3
Mouse Phenotype	MP:0006266	decreased pulse pressure	0.003677	1	1	THBS1
Mouse Phenotype	MP:0011833	abnormal cremaster muscle morphology	0.003677	1	1	ESR1
Mouse Phenotype	MP:0009217	abnormal peritoneal vaginal process morphology	0.003677	1	1	HOXA10
Mouse Phenotype	MP:0010501	atrium myocardium hypoplasia	0.003677	1	1	NTF3
Mouse Phenotype	MP:0020545	decreased hippocampal fornix size	0.003677	1	1	EMX2
Mouse Phenotype	MP:0009210	absent internal female genitalia	0.003677	1	1	EMX2
Mouse Phenotype	MP:0009664	abnormal luminal closure	0.003677	1	1	PGR
Mouse Phenotype	MP:0009218	absent peritoneal vaginal process	0.003677	1	1	HOXA10
Mouse Phenotype	MP:0004662	abnormal thyroid diverticulum morphology	0.003677	1	1	PAX8
Mouse Phenotype	MP:0010558	sinus venosus hypoplasia	0.003677	1	1	NTF3
Mouse Phenotype	MP:0005414	extrahepatic cholestasis	0.003677	1	1	SOX17
Mouse Phenotype	MP:0000985	abnormal Merkel's receptor morphology	0.003677	1	1	NTF3
Mouse Phenotype	MP:0008322	abnormal somatotroph morphology	0.003711	2	25	PAX8,LEP
Mouse Phenotype	MP:0004245	genital hemorrhage	0.003711	2	25	FST,ESR1
Mouse Phenotype	MP:0011499	abnormal glomerular capsule space morphology	0.003711	2	25	DCN,AGTR1
Mouse Phenotype	MP:0008869	anovulation	0.003711	2	25	ESR1,PGR
Mouse Phenotype	MP:0005138	decreased prolactin level	0.003711	2	25	LEP,ESR1
Mouse Phenotype	MP:0009132	abnormal white fat cell size	0.003745	3	86	LEP,ESR1,AGTR1
Mouse Phenotype	MP:0001882	abnormal lactation	0.003869	3	87	RXFP1,ESR1,PGR
Mouse Phenotype	MP:0010783	abnormal stomach wall morphology	0.003996	3	88	THBS1,DCN,ESR1
Mouse Phenotype	MP:0005646	abnormal pituitary gland physiology	0.004011	2	26	GATA2,ESR1
Mouse Phenotype	MP:0003722	absent ureter	0.004011	2	26	EMX2,PAX8
Mouse Phenotype	MP:0000464	increased presacral vertebrae number	0.004011	2	26	HOXA10,FST
Mouse Phenotype	MP:0009016	abnormal estrus	0.004011	2	26	FOXA2,LEP
Mouse Phenotype	MP:0010771	integument phenotype	0.004018	14	1860	NGF,IRF6,THBS1,RXFP1,MME,CSF1R,FOXA2,DCN,FST,LEP,ESR1,BDNF,PGR,NRP2
Mouse Phenotype	MP:0002211	abnormal primary sex determination	0.004036	7	570	SOX17,HOXA10,RXFP1,EMX2,PAX8,LEP,ESR1
Mouse Phenotype	MP:0002136	abnormal kidney physiology	0.004242	6	429	C3,THBS1,DCN,PAX8,ESR1,AGTR1
Mouse Phenotype	MP:0009504	abnormal mammary gland epithelium morphology	0.004256	3	90	LEP,ESR1,PGR
Mouse Phenotype	MP:0001845	abnormal inflammatory response	0.004259	11	1267	SOX17,AIF1,C3,THBS1,MME,TAGLN,DCN,LEP,ESR1,PGR,AGTR1
Mouse Phenotype	MP:0010200	enlarged lymphatic vessel	0.004322	2	27	PTH1R,NRP2
Mouse Phenotype	MP:0003620	oliguria	0.004322	2	27	PAX8,AGTR1
Mouse Phenotype	MP:0009361	abnormal primordial ovarian follicle morphology	0.004322	2	27	FST,ESR1
Mouse Phenotype	MP:0002451	abnormal macrophage physiology	0.004389	6	432	MSR1,PTN,C3,THBS1,LEP,ESR1
Mouse Phenotype	MP:0003698	abnormal male reproductive system physiology	0.004436	9	908	PLCB1,HOXA10,RXFP1,CSF1R,DCN,PAX8,LEP,ESR1,BDNF
Mouse Phenotype	MP:0006315	abnormal urine protein level	0.004633	4	187	C3,PAX8,LEP,ESR1
Mouse Phenotype	MP:0004905	decreased uterus weight	0.004643	2	28	ESR1,PGR
Mouse Phenotype	MP:0001728	failure of embryo implantation	0.004643	2	28	ESR1,PGR
Mouse Phenotype	MP:0004910	decreased seminal vesicle weight	0.004643	2	28	GATA2,LEP
Mouse Phenotype	MP:0013570	abnormal neuroendocrine gland physiology	0.004643	2	28	GATA2,ESR1
Mouse Phenotype	MP:0004193	abnormal kidney papilla morphology	0.004643	2	28	PAX8,AGTR1
Mouse Phenotype	MP:0000135	decreased compact bone thickness	0.004666	3	93	CSF1R,PAX8,ESR1
Mouse Phenotype	MP:0003402	decreased liver weight	0.004808	3	94	SOX17,PTN,LEP
Mouse Phenotype	MP:0001262	decreased body weight	0.004818	14	1896	GATA2,NGF,PLCB1,C3,THBS1,CSF1R,DCN,FST,PAX8,NTF3,LEP,ESR1,BDNF,AGTR1
Mouse Phenotype	MP:0012322	decreased total tissue mass	0.004818	14	1896	GATA2,NGF,PLCB1,C3,THBS1,CSF1R,DCN,FST,PAX8,NTF3,LEP,ESR1,BDNF,AGTR1
Mouse Phenotype	MP:0008271	abnormal bone ossification	0.004962	6	443	IRF6,CSF1R,PAX8,PTH1R,ESR1,PGR
Mouse Phenotype	MP:0009254	disorganized pancreatic islets	0.004976	2	29	FOXA2,LEP
Mouse Phenotype	MP:0004040	altered susceptibility to kidney reperfusion injury	0.004976	2	29	THBS1,PAX8
Mouse Phenotype	MP:0002907	abnormal parturition	0.004976	2	29	RXFP1,DCN
Mouse Phenotype	MP:0012703	decreased embryonic neuroepithelium thickness	0.004976	2	29	FOXA2,LEP
Mouse Phenotype	MP:0009907	decreased tongue size	0.004976	2	29	BNC2,BDNF
Mouse Phenotype	MP:0005449	abnormal food intake	0.005017	6	444	C3,TAGLN,FOXA2,NTF3,LEP,BDNF
Mouse Phenotype	MP:0002998	abnormal bone remodeling	0.005087	4	192	CSF1R,PAX8,PTH1R,ESR1
Mouse Phenotype	MP:0010680	abnormal skin adnexa physiology	0.005087	4	192	RXFP1,ESR1,BDNF,PGR
Mouse Phenotype	MP:0002693	abnormal pancreas physiology	0.005223	5	312	C3,THBS1,FOXA2,LEP,PGR
Mouse Phenotype	MP:0004953	decreased spleen weight	0.005249	3	97	AIF1,TNFSF13B,ESR1
Mouse Phenotype	MP:0003245	abnormal GABAergic neuron morphology	0.005319	2	30	GATA2,BDNF
Mouse Phenotype	MP:0001596	hypotension	0.005319	2	30	LEP,AGTR1
Mouse Phenotype	MP:0011469	abnormal urine creatinine level	0.005319	2	30	PAX8,AGTR1
Mouse Phenotype	MP:0000559	abnormal femur morphology	0.005374	4	195	HOXA10,PAX8,LEP,ESR1
Mouse Phenotype	MP:0001859	kidney inflammation	0.005374	4	195	C3,DCN,ESR1,AGTR1
Mouse Phenotype	MP:0005605	increased bone mass	0.005402	3	98	CSF1R,LEP,PGR
Mouse Phenotype	MP:0002210	abnormal sex determination	0.005448	7	602	SOX17,HOXA10,RXFP1,EMX2,PAX8,LEP,ESR1
Mouse Phenotype	MP:0001654	hepatic necrosis	0.005556	3	99	C3,MME,ESR1
Mouse Phenotype	MP:0009489	abnormal blood vessel endothelium morphology	0.005556	3	99	GATA2,SOX17,NGF
Mouse Phenotype	MP:0004902	abnormal uterus size	0.005556	3	99	PAX8,ESR1,PGR
Mouse Phenotype	MP:0013325	abnormal male reproductive gland morphology	0.005571	8	767	GATA2,PLCB1,HOXA10,RXFP1,EMX2,PAX8,LEP,ESR1
Mouse Phenotype	MP:0005023	abnormal wound healing	0.00567	4	198	THBS1,LEP,ESR1,PGR
Mouse Phenotype	MP:0011294	renal glomerulus hypertrophy	0.005673	2	31	LEP,ESR1
Mouse Phenotype	MP:0004192	abnormal kidney pyramid morphology	0.005673	2	31	PAX8,AGTR1
Mouse Phenotype	MP:0030310	abnormal cranial foramen morphology	0.005673	2	31	PAX8,PTH1R
Mouse Phenotype	MP:0001963	abnormal hearing physiology	0.005709	6	456	GATA2,PTN,CSF1R,EMX2,PAX8,BDNF
Mouse Phenotype	MP:0003119	abnormal digestive system development	0.005714	3	100	SOX17,IRF6,FOXA2
Mouse Phenotype	MP:0003856	abnormal hindlimb stylopod morphology	0.005772	4	199	HOXA10,PAX8,LEP,ESR1
Mouse Phenotype	MP:0002060	abnormal skin morphology	0.00578	9	945	IRF6,THBS1,MME,FOXA2,DCN,FST,LEP,BDNF,NRP2
Mouse Phenotype	MP:0002006	neoplasm	0.00586	9	947	CXCL16,THBS1,TAGLN,FOXA2,DCN,LEP,PTH1R,ESR1,PGR
Mouse Phenotype	MP:0003055	abnormal long bone epiphyseal plate morphology	0.005874	4	200	CSF1R,LEP,PTH1R,ESR1
Mouse Phenotype	MP:0002896	abnormal bone mineralization	0.005978	4	201	CSF1R,PAX8,PTH1R,ESR1
Mouse Phenotype	MP:0008469	abnormal protein level	0.005989	10	1133	SOX17,PTN,C3,CXCL16,MME,CSF1R,PEMT,LEP,ESR1,AGTR1
Mouse Phenotype	MP:0009811	abnormal prostaglandin level	0.006037	2	32	LPAR3,PTGIS
Mouse Phenotype	MP:0002856	abnormal vestibular ganglion morphology	0.006037	2	32	NTF3,BDNF
Mouse Phenotype	MP:0001758	abnormal urine glucose level	0.006037	2	32	PAX8,LEP
Mouse Phenotype	MP:0005325	abnormal renal glomerulus morphology	0.006199	5	325	C3,PAX8,LEP,ESR1,AGTR1
Mouse Phenotype	MP:0001554	increased circulating free fatty acid level	0.006203	3	103	C3,FOXA2,LEP
Mouse Phenotype	MP:0001547	abnormal lipid level	0.006218	10	1139	MSR1,SOX17,C3,LPAR3,PEMT,FOXA2,PTGIS,LEP,ESR1,BDNF
Mouse Phenotype	MP:0011762	renal/urinary system inflammation	0.006297	4	204	C3,DCN,ESR1,AGTR1
Mouse Phenotype	MP:0005083	abnormal biliary tract morphology	0.006371	3	104	SOX17,THBS1,PTH1R
Mouse Phenotype	MP:0011182	decreased hematopoietic cell number	0.006398	12	1535	GATA2,SOX17,PTN,AIF1,C3,CXCL16,THBS1,CSF1R,LEP,TNFSF13B,ESR1,PGR
Mouse Phenotype	MP:0001196	shiny skin	0.006412	2	33	IRF6,FST
Mouse Phenotype	MP:0001096	abnormal glossopharyngeal ganglion morphology	0.006412	2	33	NTF3,BDNF
Mouse Phenotype	MP:0004991	decreased bone strength	0.006412	2	33	CSF1R,ESR1
Mouse Phenotype	MP:0002680	decreased corpora lutea number	0.006412	2	33	FST,ESR1
Mouse Phenotype	MP:0002823	abnormal rib development	0.006412	2	33	HOXA10,FST
Mouse Phenotype	MP:0009009	absent estrous cycle	0.006412	2	33	FOXA2,ESR1
Mouse Phenotype	MP:0002067	abnormal sensory capabilities/reflexes/nociception	0.006452	9	961	NGF,PLCB1,PEMT,FOXA2,EMX2,NTF3,LEP,ESR1,BDNF
Mouse Phenotype	MP:0002132	abnormal respiratory system morphology	0.006496	9	962	THBS1,RXFP1,FOXA2,EMX2,FST,PTH1R,ESR1,PGR,NRP2
Mouse Phenotype	MP:0001130	abnormal ovarian folliculogenesis	0.006542	3	105	FST,LEP,ESR1
Mouse Phenotype	MP:0005370	liver/biliary system phenotype	0.0066	11	1341	GATA2,SOX17,PTN,C3,THBS1,MME,PEMT,FOXA2,LEP,PTH1R,ESR1
Mouse Phenotype	MP:0006325	impaired hearing	0.006627	4	207	CSF1R,EMX2,PAX8,BDNF
Mouse Phenotype	MP:0009345	abnormal trabecular bone thickness	0.006716	3	106	HTRA1,LEP,PGR
Mouse Phenotype	MP:0013555	abnormal apocrine gland physiology	0.006716	3	106	RXFP1,ESR1,PGR
Mouse Phenotype	MP:0001881	abnormal mammary gland physiology	0.006716	3	106	RXFP1,ESR1,PGR
Mouse Phenotype	MP:0009094	abnormal endometrial gland morphology	0.006797	2	34	ESR1,PGR
Mouse Phenotype	MP:0004906	enlarged uterus	0.006797	2	34	ESR1,PGR
Mouse Phenotype	MP:0002876	abnormal thyroid physiology	0.006797	2	34	PAX8,LEP
Mouse Phenotype	MP:0005369	muscle phenotype	0.006926	12	1550	SOX17,NGF,C3,THBS1,TAGLN,DCN,FST,NTF3,LEP,ESR1,PGR,NRP2
Mouse Phenotype	MP:0001261	obese	0.007072	3	108	LEP,ESR1,BDNF
Mouse Phenotype	MP:0002058	neonatal lethality	0.007136	9	976	SOX17,BNC2,IRF6,FOXA2,EMX2,FST,NTF3,PTH1R,BDNF
Mouse Phenotype	MP:0009671	abnormal uterus physiology	0.007193	2	35	ESR1,PGR
Mouse Phenotype	MP:0005185	decreased circulating progesterone level	0.007193	2	35	ESR1,PGR
Mouse Phenotype	MP:0002847	abnormal renal glomerular filtration rate	0.007193	2	35	PAX8,AGTR1
Mouse Phenotype	MP:0010984	abnormal metanephric mesenchyme morphology	0.007193	2	35	EMX2,PAX8
Mouse Phenotype	MP:0004908	abnormal seminal vesicle weight	0.007193	2	35	GATA2,LEP
Mouse Phenotype	MP:0005084	abnormal gallbladder morphology	0.007193	2	35	SOX17,THBS1
Mouse Phenotype	MP:0002286	cryptorchism	0.007193	2	35	HOXA10,RXFP1
Mouse Phenotype	MP:0000999	abnormal golgi tendon organ morphology	0.007315	1	2	NTF3
Mouse Phenotype	MP:0009492	abnormal gallbladder epithelium morphology	0.007315	1	2	SOX17
Mouse Phenotype	MP:0009371	increased theca cell number	0.007315	1	2	ESR1
Mouse Phenotype	MP:0011678	abnormal vomeronasal sensory neuron physiology	0.007315	1	2	NRP2
Mouse Phenotype	MP:0001000	absent golgi tendon organ	0.007315	1	2	NTF3
Mouse Phenotype	MP:0011858	elongated kidney papilla	0.007315	1	2	PAX8
Mouse Phenotype	MP:0003251	gallbladder inflammation	0.007315	1	2	SOX17
Mouse Phenotype	MP:0005151	diffuse hepatic necrosis	0.007315	1	2	MME
Mouse Phenotype	MP:0009296	increased mammary fat pad weight	0.007315	1	2	ESR1
Mouse Phenotype	MP:0009663	abnormal uterine-embryonic axis	0.007315	1	2	PGR
Mouse Phenotype	MP:0009163	absent pancreatic duct	0.007315	1	2	FOXA2
Mouse Phenotype	MP:0003673	abnormal inguinal canal morphology	0.007315	1	2	HOXA10
Mouse Phenotype	MP:0030397	abnormal incus lenticular process morphology	0.007315	1	2	EMX2
Mouse Phenotype	MP:0009213	absent male inguinal canal	0.007315	1	2	HOXA10
Mouse Phenotype	MP:0010576	premature closure of the ductus arteriosus	0.007315	1	2	NTF3
Mouse Phenotype	MP:0009215	absent uterine horn	0.007315	1	2	PAX8
Mouse Phenotype	MP:0020544	abnormal hippocampal fornix size	0.007315	1	2	EMX2
Mouse Phenotype	MP:0008016	abnormal male inguinal canal morphology	0.007315	1	2	HOXA10
Mouse Phenotype	MP:0030412	absent round window	0.007315	1	2	PAX8
Mouse Phenotype	MP:0009365	abnormal theca folliculi	0.007315	1	2	ESR1
Mouse Phenotype	MP:0008459	abnormal circulating pancreatic peptide level	0.007315	1	2	LEP
Mouse Phenotype	MP:0014010	abnormal peroxisome morphology	0.007315	1	2	SOX17
Mouse Phenotype	MP:0008334	increased gonadotroph cell number	0.007315	1	2	ESR1
Mouse Phenotype	MP:0000665	decreased ductal branching in the coagulating gland	0.007315	1	2	HOXA10
Mouse Phenotype	MP:0013846	retropharyngeal edema	0.007315	1	2	PTH1R
Mouse Phenotype	MP:0009359	endometrium atrophy	0.007315	1	2	ESR1
Mouse Phenotype	MP:0010549	absent dorsal mesocardium	0.007315	1	2	FOXA2
Mouse Phenotype	MP:0013596	abnormal vomeronasal organ physiology	0.007315	1	2	NRP2
Mouse Phenotype	MP:0030396	abnormal incus long process morphology	0.007315	1	2	EMX2
Mouse Phenotype	MP:0009069	dilated oviduct	0.007315	1	2	PAX8
Mouse Phenotype	MP:0030411	small round window	0.007315	1	2	PAX8
Mouse Phenotype	MP:0005675	small gallbladder	0.007315	1	2	SOX17
Mouse Phenotype	MP:0013774	decreased KLRG1-positive T-helper cell number	0.007315	1	2	PTH1R
Mouse Phenotype	MP:0010548	abnormal dorsal mesocardium morphology	0.007315	1	2	FOXA2
Mouse Phenotype	MP:0005494	esophagogastric junction metaplasia	0.007315	1	2	THBS1
Mouse Phenotype	MP:0012334	decreased circulating homocysteine level	0.007315	1	2	PEMT
Mouse Phenotype	MP:0030398	absent incus lenticular process	0.007315	1	2	EMX2
Mouse Phenotype	MP:0001131	abnormal ovarian follicle morphology	0.007321	4	213	FST,LEP,ESR1,PGR
Mouse Phenotype	MP:0005358	abnormal incisor morphology	0.007439	3	110	IRF6,FOXA2,FST
Mouse Phenotype	MP:0006092	abnormal olfactory sensory neuron morphology	0.007598	2	36	EMX2,FST
Mouse Phenotype	MP:0009205	abnormal internal male genitalia morphology	0.007657	8	809	GATA2,PLCB1,HOXA10,RXFP1,EMX2,PAX8,LEP,ESR1
Mouse Phenotype	MP:0001944	abnormal pancreas morphology	0.007662	5	342	SOX17,THBS1,FOXA2,LEP,PGR
Mouse Phenotype	MP:0000157	abnormal sternum morphology	0.00781	4	217	HOXA10,IRF6,FST,PTH1R
Mouse Phenotype	MP:0000778	abnormal nervous system tract morphology	0.00781	4	217	CSF1R,EMX2,NTF3,NRP2
Mouse Phenotype	MP:0003638	abnormal response/metabolism to endogenous compounds	0.007817	3	112	ESR1,PGR,AGTR1
Mouse Phenotype	MP:0013559	abnormal exocrine gland physiology	0.007935	4	218	THBS1,RXFP1,ESR1,PGR
Mouse Phenotype	MP:0000116	abnormal tooth development	0.00801	3	113	IRF6,CSF1R,FST
Mouse Phenotype	MP:0009506	abnormal mammary gland alveolus morphology	0.008014	2	37	ESR1,PGR
Mouse Phenotype	MP:0004695	increased length of long bones	0.008014	2	37	PTH1R,ESR1
Mouse Phenotype	MP:0002079	increased circulating insulin level	0.00819	4	220	FOXA2,LEP,BDNF,PGR
Mouse Phenotype	MP:0002752	abnormal somatic nervous system morphology	0.008402	9	1001	NGF,HOXA10,AIF1,EMX2,FST,PAX8,NTF3,BDNF,NRP2
Mouse Phenotype	MP:0009117	abnormal white fat cell morphology	0.008405	3	115	LEP,ESR1,AGTR1
Mouse Phenotype	MP:0005296	abnormal humerus morphology	0.008405	3	115	HOXA10,LEP,PGR
Mouse Phenotype	MP:0004014	abnormal uterine environment	0.00844	2	38	ESR1,PGR
Mouse Phenotype	MP:0010352	gastrointestinal tract polyps	0.00844	2	38	THBS1,TAGLN
Mouse Phenotype	MP:0000474	abnormal foregut morphology	0.00844	2	38	SOX17,FOXA2
Mouse Phenotype	MP:0001015	small superior cervical ganglion	0.00844	2	38	NGF,NTF3
Mouse Phenotype	MP:0004774	abnormal bile salt level	0.00844	2	38	SOX17,PEMT
Mouse Phenotype	MP:0000601	small liver	0.00845	4	222	GATA2,SOX17,PTN,LEP
Mouse Phenotype	MP:0000527	abnormal kidney development	0.008606	3	116	EMX2,PAX8,AGTR1
Domain	SM00140	NGF	3.331e-08	3	4	NGF,NTF3,BDNF
Domain	IPR002072	Nerve_growth_factor-rel	3.331e-08	3	4	NGF,NTF3,BDNF
Domain	PF00243	NGF	3.331e-08	3	4	NGF,NTF3,BDNF
Domain	PS50270	NGF_2	3.331e-08	3	4	NGF,NTF3,BDNF
Domain	IPR019846	Nerve_growth_factor_CS	3.331e-08	3	4	NGF,NTF3,BDNF
Domain	PD002052	Nerve_growth_factor-rel	3.331e-08	3	4	NGF,NTF3,BDNF
Domain	PS00248	NGF_1	3.331e-08	3	4	NGF,NTF3,BDNF
Domain	IPR020408	Nerve_growth_factor-like	3.331e-08	3	4	NGF,NTF3,BDNF
Domain	3.30.50.10	-	0.0002258	3	57	GATA2,ESR1,PGR
Domain	IPR013088	Znf_NHR/GATA	0.0002377	3	58	GATA2,ESR1,PGR
Domain	2.10.90.10	-	0.0003643	3	67	NGF,NTF3,BDNF
Domain	IPR029034	Cystine-knot_cytokine	0.0003643	3	67	NGF,NTF3,BDNF
Domain	IPR020425	Nerve_growth_factor_bsu	0.002086	1	1	NGF
Domain	IPR020430	Brain-der_neurotrophic_factor	0.002086	1	1	BDNF
Domain	IPR020437	Nerve_growth_factor_bsu_mml	0.002086	1	1	NGF
Domain	IPR005385	LPA_rcpt_EDG7	0.002086	1	1	LPAR3
Domain	IPR024960	PEMT/MFAP	0.002086	1	1	PEMT
Domain	PS51599	SAM_PEMT_PEM2	0.002086	1	1	PEMT
Domain	IPR000065	Leptin	0.002086	1	1	LEP
Domain	IPR003543	Macro_scav_rcpt	0.002086	1	1	MSR1
Domain	IPR026296	CXCL16	0.002086	1	1	CXCL16
Domain	IPR030658	CSF-1_receptor	0.002086	1	1	CSF1R
Domain	IPR003549	Claudin3	0.002086	1	1	CLDN3
Domain	IPR001292	Oestr_rcpt	0.002086	1	1	ESR1
Domain	IPR028499	Thrombospondin-1	0.002086	1	1	THBS1
Domain	IPR029727	MME/CD10/NEP	0.002086	1	1	MME
Domain	IPR024736	Oestrogen-typ_rcpt_final_C_dom	0.002086	1	1	ESR1
Domain	IPR002170	GPCR_2_parathyroid_rcpt	0.002086	1	1	PTH1R
Domain	IPR015578	Neurotrophin-3	0.002086	1	1	NTF3
Domain	IPR029522	GATA-2	0.002086	1	1	GATA2
Domain	IPR028549	Decorin	0.002086	1	1	DCN
Domain	PF04191	PEMT	0.002086	1	1	PEMT
Domain	IPR000128	Progest_rcpt	0.002086	1	1	PGR
Domain	PF02159	Oest_recep	0.002086	1	1	ESR1
Domain	PD005698	Leptin	0.002086	1	1	LEP
Domain	IPR028400	PLC-beta1	0.002086	1	1	PLCB1
Domain	PF12743	ESR1_C	0.002086	1	1	ESR1
Domain	IPR027286	PTGIS	0.002086	1	1	PTGIS
Domain	IPR007318	Phopholipid_MeTrfase	0.002086	1	1	PEMT
Domain	PF02161	Prog_receptor	0.002086	1	1	PGR
Domain	PF03523	Macscav_rec	0.002086	1	1	MSR1
Domain	PF02024	Leptin	0.002086	1	1	LEP
Domain	IPR027143	Neuropilin-2	0.002086	1	1	NRP2
Domain	PF07648	Kazal_2	0.002544	2	36	HTRA1,FST
Domain	IPR001628	Znf_hrmn_rcpt	0.004125	2	46	ESR1,PGR
Domain	SM00399	ZnF_C4	0.004125	2	46	ESR1,PGR
Domain	SM00280	KAZAL	0.004125	2	46	HTRA1,FST
Domain	PS00031	NUCLEAR_REC_DBD_1	0.004125	2	46	ESR1,PGR
Domain	PF00105	zf-C4	0.004125	2	46	ESR1,PGR
Domain	PS51030	NUCLEAR_REC_DBD_2	0.004125	2	46	ESR1,PGR
Domain	IPR001723	Nuclear_hrmn_rcpt	0.004125	2	46	ESR1,PGR
Domain	PF11980	DUF3481	0.004159	1	2	NRP2
Domain	2.20.60.10	-	0.004159	1	2	PTN
Domain	PS00619	PTN_MK_1	0.004159	1	2	PTN
Domain	2.30.90.10	-	0.004159	1	2	PTN
Domain	IPR020091	PTN/MK_diS	0.004159	1	2	PTN
Domain	IPR014648	Neuropilin	0.004159	1	2	NRP2
Domain	PS00620	PTN_MK_2	0.004159	1	2	PTN
Domain	SM00193	PTN	0.004159	1	2	PTN
Domain	IPR008112	Relaxin_rcpt	0.004159	1	2	RXFP1
Domain	IPR020090	PTN/MK_C_dom	0.004159	1	2	PTN
Domain	IPR022579	Neuropilin_C	0.004159	1	2	NRP2
Domain	PF05196	PTN_MK_N	0.004159	1	2	PTN
Domain	PF01091	PTN_MK_C	0.004159	1	2	PTN
Domain	IPR020089	PTN/MK_N_dom	0.004159	1	2	PTN
Domain	IPR020092	PTN_MK_heparin-bd_GF_CS	0.004159	1	2	PTN
Domain	IPR000762	Midkine_heparin-bd_GF	0.004159	1	2	PTN
Domain	PD005592	PTN_MK_hepar_bd	0.004159	1	2	PTN
Domain	1.10.565.10	-	0.004302	2	47	ESR1,PGR
Domain	IPR000536	Nucl_hrmn_rcpt_lig-bd	0.004484	2	48	ESR1,PGR
Domain	SM00430	HOLI	0.004484	2	48	ESR1,PGR
Domain	PF00104	Hormone_recep	0.004484	2	48	ESR1,PGR
Domain	PS51465	KAZAL_2	0.004856	2	50	HTRA1,FST
Domain	IPR002350	Kazal_dom	0.005048	2	51	HTRA1,FST
Domain	IPR004065	LPA_rcpt	0.006232	1	3	LPAR3
Domain	IPR013638	Fork-head_N	0.006232	1	3	FOXA2
Domain	PF08703	PLC-beta_C	0.006232	1	3	PLCB1
Domain	PF12403	Pax2_C	0.006232	1	3	PAX8
Domain	IPR018533	Forkhead_box_C	0.006232	1	3	FOXA2
Domain	IPR033392	Sox7/17/18_central	0.006232	1	3	SOX17
Domain	PF12067	Sox17_18_mid	0.006232	1	3	SOX17
Domain	PF06631	DUF1154	0.006232	1	3	PLCB1
Domain	IPR000190	ATII_AT1_rcpt	0.006232	1	3	AGTR1
Domain	PS51516	SOX_C	0.006232	1	3	SOX17
Domain	IPR009535	PLC-beta_CS	0.006232	1	3	PLCB1
Domain	IPR022130	Pax2_C	0.006232	1	3	PAX8
Domain	PF08430	Forkhead_N	0.006232	1	3	FOXA2
Domain	IPR016352	SLRP_I_decor/aspor/byglycan	0.006232	1	3	DCN
Domain	IPR014815	PLC-beta_C	0.006232	1	3	PLCB1
Domain	PF09354	HNF_C	0.006232	1	3	FOXA2
Domain	IPR001186	Brdyknn_1_rcpt	0.006232	1	3	AGTR1
Domain	IPR016374	TF_GATA-2/3	0.006232	1	3	GATA2
Domain	IPR021934	Sox_C	0.006232	1	3	SOX17
Domain	IPR001940	Peptidase_S1C	0.008301	1	4	HTRA1
Domain	IPR008097	CX3CL1	0.008301	1	4	CCL2
Domain	1.20.91.20	-	0.008301	1	4	C3
Domain	IPR016280	PLC-beta	0.008301	1	4	PLCB1
Domain	IPR001840	Anaphylatoxn_comp_syst_dom	0.01037	1	5	C3
Domain	4.10.1080.10	-	0.01037	1	5	THBS1
Domain	IPR008859	Thrombospondin_C	0.01037	1	5	THBS1
Domain	PS51234	TSP3	0.01037	1	5	THBS1
Domain	PF05735	TSP_C	0.01037	1	5	THBS1
Domain	PF09289	FOLN	0.01037	1	5	FST
Domain	PF02412	TSP_3	0.01037	1	5	THBS1
Domain	IPR000248	ATII_rcpt	0.01037	1	5	AGTR1
Domain	PS51236	TSP_CTER	0.01037	1	5	THBS1
Domain	IPR017897	Thrombospondin_3_rpt	0.01037	1	5	THBS1
Domain	IPR028974	TSP_type-3_rpt	0.01037	1	5	THBS1
Domain	IPR015369	Follistatin/Osteonectin_EGF	0.01037	1	5	FST
Domain	IPR024178	Oest_rcpt/oest-rel_rcp	0.01037	1	5	ESR1
Domain	IPR018081	Anaphylatoxin_comp_syst	0.01037	1	5	C3
Domain	IPR024204	Cyt_P450_CYP7A1-type	0.01037	1	5	PTGIS
Domain	IPR003367	Thrombospondin_3-like_rpt	0.01037	1	5	THBS1
Domain	1.10.10.10	-	0.01044	3	218	IRF6,FOXA2,PAX8
Domain	PS01052	CALPONIN_1	0.01243	1	6	TAGLN
Domain	IPR033112	PLipase_A2_Asp_AS	0.01243	1	6	PLA2G2A
Domain	PF00402	Calponin	0.01243	1	6	TAGLN
Domain	IPR000557	Calponin_repeat	0.01243	1	6	TAGLN
Domain	PS51122	CALPONIN_2	0.01243	1	6	TAGLN
Domain	IPR016243	Tyr_kinase_CSF1/PDGF_rcpt	0.01243	1	6	CSF1R
Domain	IPR011991	WHTH_DNA-bd_dom	0.01397	3	243	IRF6,FOXA2,PAX8
Domain	PS01178	ANAPHYLATOXIN_2	0.01448	1	7	C3
Domain	IPR000718	Peptidase_M13	0.01448	1	7	MME
Domain	PF10401	IRF-3	0.01448	1	7	IRF6
Domain	IPR008753	Peptidase_M13_N	0.01448	1	7	MME
Domain	PF01821	ANATO	0.01448	1	7	C3
Domain	IPR000020	Anaphylatoxin/fibulin	0.01448	1	7	C3
Domain	SM00104	ANATO	0.01448	1	7	C3
Domain	PF01431	Peptidase_M13	0.01448	1	7	MME
Domain	IPR019471	Interferon_reg_factor-3	0.01448	1	7	IRF6
Domain	SM01243	IRF-3	0.01448	1	7	IRF6
Domain	IPR018497	Peptidase_M13_C	0.01448	1	7	MME
Domain	PF05649	Peptidase_M13_N	0.01448	1	7	MME
Domain	PS01177	ANAPHYLATOXIN_1	0.01448	1	7	C3
Domain	IPR001277	CXCR4/ACKR2	0.01448	1	7	AGTR1
Domain	IPR020479	Homeobox_metazoa	0.01507	2	90	HOXA10,EMX2
Domain	2.60.40.690	-	0.01654	1	8	C3
Domain	SM01361	A2M_recep	0.01654	1	8	C3
Domain	SM01359	A2M_N_2	0.01654	1	8	C3
Domain	PF00068	Phospholip_A2_1	0.01654	1	8	PLA2G2A
Domain	SM01360	A2M	0.01654	1	8	C3
Domain	IPR019742	MacrogloblnA2_CS	0.01654	1	8	C3
Domain	IPR001824	Tyr_kinase_rcpt_3_CS	0.01654	1	8	CSF1R
Domain	PS00240	RECEPTOR_TYR_KIN_III	0.01654	1	8	CSF1R
Domain	PF10569	Thiol-ester_cl	0.01654	1	8	C3
Domain	IPR019565	MacrogloblnA2_thiol-ester-bond	0.01654	1	8	C3
Domain	IPR000372	LRRNT	0.0177	2	98	RXFP1,DCN
Domain	SM00013	LRRNT	0.0177	2	98	RXFP1,DCN
Domain	PS51057	PAIRED_2	0.01858	1	9	PAX8
Domain	PS00034	PAIRED_1	0.01858	1	9	PAX8
Domain	PS51507	IRF_2	0.01858	1	9	IRF6
Domain	IPR019817	Interferon_reg_fac_CS	0.01858	1	9	IRF6
Domain	IPR001346	Interferon_reg_fact_DNA-bd_dom	0.01858	1	9	IRF6
Domain	PF00292	PAX	0.01858	1	9	PAX8
Domain	PF00605	IRF	0.01858	1	9	IRF6
Domain	PS00601	IRF_1	0.01858	1	9	IRF6
Domain	IPR017878	TB_dom	0.01858	1	9	FST
Domain	IPR001523	Paired_dom	0.01858	1	9	PAX8
Domain	SM00348	IRF	0.01858	1	9	IRF6
Domain	PS51364	TB	0.01858	1	9	FST
Domain	SM00351	PAX	0.01858	1	9	PAX8
Domain	SM00085	PA2c	0.01858	1	9	PLA2G2A
Domain	PS00477	ALPHA_2_MACROGLOBULIN	0.02063	1	10	C3
Domain	IPR001211	PLipase_A2	0.02063	1	10	PLA2G2A
Domain	PF07678	A2M_comp	0.02063	1	10	C3
Domain	PF07677	A2M_recep	0.02063	1	10	C3
Domain	PF07703	A2M_N_2	0.02063	1	10	C3
Domain	IPR002890	A2M_N	0.02063	1	10	C3
Domain	IPR033113	PLipase_A2_His_AS	0.02063	1	10	PLA2G2A
Domain	IPR009048	A-macroglobulin_rcpt-bd	0.02063	1	10	C3
Domain	IPR011625	A2M_N_2	0.02063	1	10	C3
Domain	PF01835	A2M_N	0.02063	1	10	C3
Domain	IPR001599	Macroglobln_a2	0.02063	1	10	C3
Domain	IPR002403	Cyt_P450_E_grp-IV	0.02063	1	10	PTGIS
Domain	PF00207	A2M	0.02063	1	10	C3
Domain	IPR011626	A2M_comp	0.02063	1	10	C3
Pathway	M5883	Genes encoding secreted soluble factors	3.034e-06	8	344	NGF,PTN,CCL2,FST,NTF3,LEP,TNFSF13B,BDNF
Pathway	M5889	Ensemble of genes encoding extracellular matrix and extracellular matrix-associated proteins	5.582e-05	11	1028	NGF,PTN,CCL2,THBS1,HTRA1,DCN,FST,NTF3,LEP,TNFSF13B,BDNF
Pathway	M5885	Ensemble of genes encoding ECM-associated proteins including ECM-affilaited proteins, ECM regulators and secreted factors	0.0001374	9	753	NGF,PTN,CCL2,HTRA1,FST,NTF3,LEP,TNFSF13B,BDNF
Pathway	SMP00098	Ketorolac Pathway	0.0001507	2	7	PLA2G2A,PTGIS
Pathway	SMP00104	Indomethacin Pathway	0.0001507	2	7	PLA2G2A,PTGIS
Pathway	SMP00094	Sulindac Pathway	0.0001507	2	7	PLA2G2A,PTGIS
Pathway	SMP00113	Oxaprozin Pathway	0.0001507	2	7	PLA2G2A,PTGIS
Pathway	SMP00085	Ketoprofen Pathway	0.0001507	2	7	PLA2G2A,PTGIS
Pathway	SMP00077	Piroxicam Pathway	0.0001507	2	7	PLA2G2A,PTGIS
Pathway	SMP00120	Naproxen Pathway	0.0001507	2	7	PLA2G2A,PTGIS
Pathway	SMP00086	Ibuprofen Pathway	0.0001507	2	7	PLA2G2A,PTGIS
Pathway	SMP00114	Nabumetone Pathway	0.0001507	2	7	PLA2G2A,PTGIS
Pathway	SMP00093	Diclofenac Pathway	0.0001507	2	7	PLA2G2A,PTGIS
Pathway	SMP00101	Suprofen Pathway	0.0001507	2	7	PLA2G2A,PTGIS
Pathway	SMP00109	Mefanamic acid Pathway	0.0001507	2	7	PLA2G2A,PTGIS
Pathway	SMP00289	Diflunisal Pathway	0.0001507	2	7	PLA2G2A,PTGIS
Pathway	SMP00102	Bromfenac Pathway	0.0002006	2	8	PLA2G2A,PTGIS
Pathway	868086	Rap1 signaling pathway	0.0002432	5	210	NGF,PLCB1,LPAR3,THBS1,CSF1R
Pathway	213307	Endocrine and other factor-regulated calcium reabsorption	0.000278	3	47	PLCB1,PTH1R,ESR1
Pathway	PW:0000244	Angiotensin II signaling	0.0003213	2	10	CCL2,AGTR1
Pathway	137977	Neurotrophic factor-mediated Trk receptor signaling	0.0004673	3	56	NGF,NTF3,BDNF
Pathway	138019	p75(NTR)-mediated signaling	0.000601	3	61	NGF,NTF3,BDNF
Pathway	PW:0000229	G protein signaling via Galphaq family	0.0006454	2	14	LPAR3,AGTR1
Pathway	PW:0000492	renin-angiotensin system signaling	0.0007434	2	15	MME,AGTR1
Pathway	83051	Cytokine-cytokine receptor interaction	0.0007684	5	270	CCL2,CXCL16,CSF1R,LEP,TNFSF13B
Pathway	83053	Neuroactive ligand-receptor interaction	0.0008764	5	278	LPAR3,RXFP1,LEP,PTH1R,AGTR1
Pathway	SMP00083	Acetylsalicylic Acid Pathway	0.0009595	2	17	PLA2G2A,PTGIS
Pathway	PW:0000485	eicosanoids metabolic	0.001078	2	18	PLA2G2A,PTGIS
Pathway	MAP00590_Prostaglandin_and_leukotriene_metabolism	MAP00590 Prostaglandin and leukotriene metabolism	0.001202	2	19	PLA2G2A,PTGIS
Pathway	1269544	GPCR ligand binding	0.001298	6	455	C3,LPAR3,CXCL16,RXFP1,PTH1R,AGTR1
Pathway	SMP00096	Celecoxib Pathway	0.001334	2	20	PLA2G2A,PTGIS
Pathway	SMP00106	Meloxicam Pathway	0.001334	2	20	PLA2G2A,PTGIS
Pathway	SMP00084	Etodolac Pathway	0.001334	2	20	PLA2G2A,PTGIS
Pathway	SMP00116	Valdecoxib Pathway	0.001334	2	20	PLA2G2A,PTGIS
Pathway	SMP00087	Rofecoxib Pathway	0.001334	2	20	PLA2G2A,PTGIS
Pathway	83064	TGF-beta signaling pathway	0.001525	3	84	THBS1,DCN,FST
Pathway	1269546	Peptide ligand-binding receptors	0.001639	4	188	C3,CXCL16,RXFP1,AGTR1
Pathway	1269545	Class A/1 (Rhodopsin-like receptors)	0.001685	5	322	C3,LPAR3,CXCL16,RXFP1,AGTR1
Pathway	83075	Renin-angiotensin system	0.001767	2	23	MME,AGTR1
Pathway	PW:0000007	mitogen activated protein kinase signaling	0.001924	2	24	PLA2G2A,BDNF
Pathway	1269499	Nuclear signaling by ERBB4	0.002088	2	25	ESR1,PGR
Pathway	138009	Plasma membrane estrogen receptor signaling	0.002258	2	26	PLCB1,ESR1
Pathway	1319988	AGE-RAGE signaling pathway in diabetic complications	0.002441	3	99	PLCB1,CCL2,AGTR1
Pathway	147809	Chagas disease (American trypanosomiasis)	0.002657	3	102	PLCB1,CCL2,C3
Pathway	695051	Phosphatidylcholine (PC) biosynthesis, PE => PC	0.002738	1	1	PEMT
Pathway	169349	Validated transcriptional targets of AP1 family members Fra1 and Fra2	0.003845	2	34	CCL2,DCN
Pathway	138062	Signaling events mediated by HDAC Class II	0.003845	2	34	GATA2,ESR1
Pathway	P05911	Angiotensin II-stimulated signaling through G proteins and beta-arrestin	0.004071	2	35	PLCB1,AGTR1
Pathway	83105	Pathways in cancer	0.004084	5	395	PLCB1,LPAR3,CSF1R,PAX8,AGTR1
[truncated: 29,864 more rows]
